# Supplementary material for: Neighbor communities in drug combination networks characterize synergistic effect
Source: Royal Society of Chemistry journal article supplement (doi:10.1039/c2mb25267h), 2012-09-05
Supplement: c2mb25267h_2.zip [file c2mb25267h_2.zip]

## Sheet: Table S6
ID	A1	A2	A3	A4	A5	A6	A7	A8	A9	A10	A11	A12	A13	A14	A15	A16	A17	A18	B1	B2	B3	B4	B5	B6	B7	B8	B9	B10	B11	B12	B13	B14	B15	B16	B17	B18	B19	B20	B21	B22	B23	B24	B25	B26	B27	B28	B29	B30	B31
DC001	-0.06	-0.36	-0.69	-0.87	-0.96	-1.2	-1.59	-1.93	-1.39	-2.17	-1.9	-2.1	-1.42	-0.98	-1.6	-1.51	-1.14	-1.2	-0.99	-1.94	-1.14	-1.17	-0.64	-1.13	-1.09	-0.83	-1	-0.98	-0.69	-0.79	-2.49	-2.12	-2.01	-2.3	-0.07	-0.16	-1.74	-1.01	-1.63	-1.3	0.28	-0.36	-1.81	-0.51	0.33	-1.64	0.85	-0.66	-2.02
DC002	1.04	-0.05	-0.02	-0.1	-0.43	-0.63	0.3	-0.53	0.02	0.19	-0.14	0.21	-0.33	-1.45	-0.87	-0.66	-0.97	-0.95	1.36	-0.17	-0.57	0.54	0.96	1	1.01	-0.17	1	1	0.23	-0.87	1.03	0.66	-0.29	1	0.98	-0.77	1.01	-0.16	-0.1	1	0.84	-0.64	0.85	0.64	1.6	1.03	0.98	0.55	0.85
DC003	1.43	-0.96	-0.37	1.2	-0.05	0.71	0.59	-0.6	-0.21	0.45	-0.27	0.42	1.55	-0.25	0.45	1.35	0.17	1.13	1.74	-0.57	0.57	0.72	0.09	0.66	0.98	0.02	1	1	-0.62	-0.49	0.59	0.62	-0.15	1	-0.37	-0.21	0.93	0.54	0.95	1	0.06	-0.15	0.61	0.5	1.31	0.65	0.68	1.14	0.33
DC004	1.32	1.4	1.08	1.17	1.14	1.3	-0.05	1.32	1.39	0.97	1.29	1.69	0.52	1.29	1.44	1.09	1.32	1.49	2.21	1.39	1.34	0.72	-0.18	0.46	0.48	-0.61	-0.67	1	-0.65	1	-1.06	-0.68	-1.39	1	-1.08	-0.34	-0.3	-0.85	-1.54	1	-0.8	0.6	0.08	0.78	0.75	0.7	0.29	1.11	-0.56
DC005	0.22	0.69	0.31	0.39	0.58	0.62	-0.3	0.49	0.66	0.76	0.66	0.82	-0.37	0.65	0.25	1.07	0.74	0.93	1.43	0.92	0.91	0.96	0.75	0.96	0.92	1.18	-0.1	1	1	-0.56	0.89	1.72	1.22	1	1	1.11	0.85	1.94	0.97	1	1	0.73	0.94	1.74	1.03	0.97	1	0.57	0.89
DC006	-0.7	-1.51	-1.39	-1.14	-1.5	-1.34	-1.26	-1.61	-1.43	-1.45	-1.84	-1.59	-1.22	-2.13	-1.87	-1.97	-2.44	-2.54	-0.68	-1.47	-2.18	-1.45	-4	-2.88	-1.14	-1.69	-1	-1	-0.98	-1.25	-3.93	-2.26	-1.55	-2.96	-1.64	-2.26	-3.03	-1.93	-1.66	-1.67	-2.5	-2.35	-1.39	-0.13	1.21	-1.61	2.17	0.35	-2.93
DC007	-0.48	-0.81	-0.92	-1.24	-0.94	-1.03	-1.37	-1.41	-1.26	-1.4	-1.4	-1.46	-1.13	-1.04	-1.21	-1.53	-1.06	-1.57	-0.21	-1.22	-1.09	-1.29	-2.55	-2.31	-1.11	-1.61	-1.01	-1	-1.29	-1.04	-3.7	-2.36	-2.14	-2.66	-1.63	-1.57	-2.77	-1.72	-1.79	-1.35	-2.09	-2.23	-1.49	-1.23	0.4	-1.2	1.58	-0.81	-2.74
DC008	-0.6	-1.15	-1	-1.11	-1.3	-1.32	-1.21	-1.53	-1.41	-1.35	-1.47	-1.15	-1.01	-2.1	-1.69	-1.36	-2.02	-2.06	-0.08	-1.16	-1.66	-1.47	-3.7	-3.14	-1.12	-1.68	-1.01	-1	-1.08	-1.2	-4.09	-2.4	-1.59	-2.77	-1.64	-1.86	-3.12	-1.78	-1.64	-1.48	-2.3	-2.08	-1.32	-0.09	0.89	-1.56	1.99	-1.37	-3.06
DC009	1.22	0.26	-0.51	0.45	0.07	-0.32	-0.55	-1.95	-1.43	-0.79	-0.92	-0.74	-0.13	-1.4	-0.9	-0.6	-0.83	-0.77	1.19	-0.16	-0.41	-0.09	-0.74	-0.36	0.99	-0.94	-0.33	1	-1	-1.15	-0.68	-0.47	0.03	1	-1.27	-1.58	0.59	-0.7	-0.41	1	-1.02	-1.68	0.32	-0.02	0.11	0.62	-0.67	-0.36	-0.18
DC010	-0.63	-1.24	-1.14	-1.39	-1.47	-1.54	-1.23	-1.29	-1.2	-1.43	-1.52	-1.16	-1.4	-1.44	-1.4	-1.57	-1.57	-1.5	-0.49	-1.34	-1.38	-1.45	-3.99	-2.47	-1.14	-1.8	-1.56	-1.4	-1.05	-1.29	-4.21	-2.3	-1.32	-3.18	-1.63	-2.25	-3.17	-1.63	-1.3	-2.07	-2.43	-1.87	-1.39	-0.07	0.79	-1.24	2.08	0.15	-2.36
DC011	-0.63	-1.24	-1.14	-1.39	-1.47	-1.54	-1.23	-1.29	-1.2	-1.43	-1.52	-1.16	-1.4	-1.44	-1.4	-1.57	-1.57	-1.5	-0.49	-1.34	-1.38	-1.45	-3.99	-2.47	-1.14	-1.8	-1.56	-1.4	-1.05	-1.29	-4.21	-2.3	-1.32	-3.18	-1.63	-2.25	-3.17	-1.63	-1.3	-2.07	-2.43	-1.87	-1.39	-0.07	0.79	-1.24	2.08	0.15	-2.36
DC012	0.15	-0.77	-0.74	-0.69	-1.19	-1.06	-0.46	-1.38	-0.86	-1.34	-1.55	-1.08	-0.61	-1.41	-0.99	-1.58	-1.97	-1.66	-0.79	-1.76	-1.5	-2.88	-4.71	-4.01	-1.12	-1.45	-1.4	-1.22	-1.78	-1.12	-3.88	-2.29	-1.03	-3.53	-1.92	-3.91	-3	-1.75	-1.1	-2.14	-2.55	-2.97	-3.31	-1.21	-0.41	-2.88	1.4	-0.61	-1.89
DC013	0.95	0.15	0.89	0.92	1.06	1.7	-1.65	-0.53	-0.55	-0.75	-0.27	-0.25	-1.73	-0.16	-0.05	-0.64	-0.07	0.56	1.65	-0.77	-0.46	-0.4	-1.1	-0.98	-1	0.07	-1	-1	-0.99	-0.38	-1.41	-0.47	-1.2	-1.04	-1.12	-1.07	-1.01	-0.24	-1.41	-1.21	-1.1	-0.75	-0.02	0.59	1.09	-0.31	0.45	-0.05	-1.04
DC014	0.18	-0.7	-0.01	-0.22	-0.78	-0.15	-0.49	-1.19	-0.45	-0.62	-1.19	-1.13	-0.06	-1.22	-0.47	-0.79	-1.33	-1.03	0.15	-1.33	-1.25	-0.89	-1.26	-0.92	-0.81	-1.18	-0.99	-1	-0.94	-1.17	-1.75	-0.52	-1.8	-1.48	-1.23	-1.11	-0.63	-0.73	-1.36	-0.92	-0.75	-1.42	-0.91	-0.48	-0.59	-1.07	-1.06	-0.86	-1.26
DC015	1.37	0.03	0.31	0.64	-0.04	0.06	0.89	-0.27	0.14	0.27	0.2	0.42	0.55	-0.48	-0.26	0.29	0.14	0.1	0.79	0.11	0.13	0.08	-0.63	-0.25	0.97	0.12	-0.12	1	-0.64	-0.75	0.18	0.79	0.19	1	-0.25	-0.58	0.94	0.74	-0.46	1	-0.08	-0.56	0.59	0.56	0.32	0.73	-0.07	0.21	0.08
DC016	-0.13	-0.43	-0.99	-0.73	-1.02	-0.86	-1.28	-1.58	-1.43	-1.45	-1.4	-1.34	-0.85	-1.31	-1.11	-1.28	-1.21	-1.24	0.18	-1.54	-1.24	-1.01	-2.13	-2.65	-1.28	0.19	-1	-1	-0.98	-1.13	-1.91	-0.67	-1.23	-1.23	-1.3	-1.92	-2	-0.39	-1.4	-1.33	-1.91	-1	-0.98	0.18	1.26	-1.1	2.18	0.97	-1.77
DC017	-0.03	-0.3	-1	-0.69	-0.06	-0.6	-0.43	-0.77	-0.91	-0.57	-0.1	-0.17	-0.01	-0.62	-1.03	-0.45	-0.13	-0.35	1.39	0.57	0.76	0.76	0.13	0.78	0.94	0.73	1	1	1.03	-0.96	0.99	1.15	1.23	1	1.21	0.21	1.04	0.28	1.07	1	1.03	-0.54	0.67	1.16	1.67	0.7	1.73	1	0.51
DC018	1.25	0.22	0.43	0.23	-0.64	-0.36	0.48	-0.55	0.17	0.34	-0.37	0.29	0.17	-0.41	-0.03	-0.23	-0.89	-0.47	-0.21	-0.47	-1.02	-1.57	-4.44	-2.06	-1	-1	-1	-1.08	-1.15	-1	-4.05	-1.12	-1.83	-0.44	-0.33	-0.18	-3.56	-1.75	-1.41	-1.47	-2.6	-0.58	-1.72	0.88	1.25	-1.41	2.29	0.74	-0.95
DC019	-0.42	-0.89	-0.78	-1.2	-0.96	-1.08	-1.68	-0.27	-0.78	-1.97	-1.43	-1.42	-2.19	-0.54	-1.07	-1.81	-1.32	-1.47	-0.43	-1.38	-1.24	-1.2	-1.87	-1.4	-0.71	-1.3	-1.14	-1	-1.31	-1.05	-2.34	-1.57	-1.68	-1.47	-1.54	-2.74	-0.86	-1.34	-1.29	-1.09	-1.64	-2.34	-1.11	-0.57	0.38	-1.05	1.39	-1.53	-1.63
DC020	0.02	-0.46	-0.69	-0.17	-1.12	-0.62	-0.55	-1.06	-1.38	-0.94	-1.24	-1.25	-0.64	-0.65	-0.6	-0.75	-1.26	-0.68	-0.24	-1.13	-1.36	-1.3	-1.43	-2.41	-1.23	-1	-1	-1.08	-1.06	0.16	-1.91	-1.38	-1.4	-1.46	-1.33	-1.21	-2.5	-1.81	-1.55	-1.16	-1.94	-0.03	-1.38	0.77	1.32	-1.24	2.32	0.93	-1.62
DC021	0.89	1.02	0.45	0.12	0.42	0.14	-1.49	0.02	-0.72	-1.85	-0.57	-1.06	-0.74	0.14	-0.62	-1.18	-0.28	-0.84	1.39	0.11	0.58	0.88	0.35	0.89	0.88	0.79	1	1	1	-0.97	0.84	1.33	0.83	1	1	-0.11	0.81	0.71	1	1	1	-0.32	0.79	0.69	0.85	0.85	0.98	0.86	0.57
DC022	-0.49	-1.68	-1.65	-1.57	-1.96	-2.16	-1.49	-1.41	-1.66	-1.39	-1.39	-1.5	-0.96	-1.34	-1.67	-1.15	-1.41	-1.55	-0.81	-1.49	-1.35	-2.14	-2.24	-1.96	-1.03	-1.26	-1.17	-1	-1.37	-1.45	-1.94	-0.76	-1.7	-1.62	-1.15	-2.22	-0.69	-1.03	-1.37	-0.95	-1.02	-2.06	-2.45	-1.26	0.27	-1.67	1.15	-1.16	-1.8
DC023	0.27	-0.15	-0.6	-1.02	-0.82	-1.04	-0.29	-0.41	-0.51	-0.79	-0.58	-0.68	-0.36	0.03	-0.12	-0.65	-0.43	-0.49	0.27	-0.65	-0.74	-1.02	-0.9	-1.77	-1	-1.16	-1	-1	-0.97	-0.44	-1.29	-1.26	-1.47	-1.19	-0.91	-0.91	-1.49	-1.58	-1.19	-1.25	-1.21	-0.51	-0.7	0.55	1.25	-0.95	2.05	0.51	-1.36
DC024	-0.32	-0.79	-0.88	-0.88	-1.05	-0.85	-2.18	-1.63	-1.53	-1.65	-0.98	-1.21	-1.93	-1.49	-1.99	-1.91	-0.96	-1.87	-0.27	-1.22	-1.09	-0.96	-1.77	-1.5	-1.18	-1.47	-1.01	-1	-0.96	-1.01	-2.79	-1.75	-1.87	-1.95	-1.55	-1.99	-2.05	-1.57	-1.63	-1.37	-1.74	-1.71	-1.2	-0.58	-1.05	-0.99	1.5	-1.3	-1.85
DC025	-0.24	-0.82	-1.04	-0.91	-1.01	-0.93	-1.17	-0.75	-0.79	-1.16	-0.74	-0.79	-1.06	-1.02	-1.16	-1.45	-0.91	-1.46	-0.08	-1.09	-1.03	-1.83	-2.86	-2.53	-1.11	-1.32	-1	-1	-1.3	-0.98	-4.13	-2.57	-2.23	-2.7	-1.7	-1.62	-2.98	-1.64	-1.68	-1.54	-2.23	-2.39	-2.28	-0.62	0.06	-1.73	1.46	-0.94	-2.87
DC026	-0.44	-0.79	-0.75	-0.78	-1.13	-0.94	-2.02	-2.44	-2.12	-1.94	-2.12	-1.94	-1.74	-2.81	-2.63	-2.42	-2.53	-3.04	-0.37	-1.51	-2.02	-1.01	-2.85	-3.07	-1.12	-1.06	-1	-1	-1.02	-1.06	-2.98	-1.51	-1.7	-2.1	-1.6	-2.49	-2.4	-1.33	-1.68	-1.3	-2.2	-1.89	-1.07	0.26	1.3	-1.22	2.27	1.07	-2.29
DC027	0.7	-0.09	0.13	0.06	-0.1	0.07	-0.94	-1.33	-1.13	-0.88	-1.11	-0.88	-1.18	-0.86	-0.57	-0.49	-0.65	-0.42	-0.18	-0.77	-0.49	0.02	-1.74	0	0.47	0.68	-1	1	0.72	1	-0.94	0.73	-1	1	-1.01	-0.34	-0.29	0.08	-1	1	-0.41	0.6	-0.03	0.34	1.38	-0.01	2.02	1.01	-1.76
DC028	-0.27	0.21	-0.6	-1.18	0.09	-0.65	-0.56	-0.57	-0.54	-0.75	-0.85	-0.78	-0.58	-0.31	-0.6	-0.95	-0.57	-0.91	1.47	-1.34	-1.19	0.88	0.52	0.66	0.55	-0.36	-1	1	0.51	1	-0.18	-0.12	-1	1	-0.91	-0.34	-0.03	-0.61	-1	1	-0.02	0.6	0.42	1.11	1.89	0.89	0.87	0.6	0.19
DC029	-0.66	-1.36	-1.61	-1.1	-1.53	-1.45	-1.33	-1.79	-1.62	-1.05	-1.84	-1.48	-1.9	-2.07	-2.22	-1.97	-2.14	-2.24	-0.66	-1.41	-1.86	-1.45	-2.58	-3.23	-1.19	-1.08	-1	-1	-1.1	-0.9	-2.5	-1.22	-0.56	-1.38	-1.54	-1.72	-2.56	-1.19	-1.14	-1.74	-2.37	-1.18	-1.5	-0.05	1.16	-1.54	2.12	0.7	-2.03
DC030	-0.75	-1.37	-1.78	-0.84	-1.4	-1.62	-1.56	-2.23	-2.55	-0.97	-1.75	-1.51	-2.42	-1.83	-2.19	-1.49	-1.39	-1.84	-0.64	-1.13	-1.02	-1.77	-2.4	-2.34	-0.98	-0.58	-1	-1	-1.34	-0.79	-2.45	-1.16	-1.76	-1.65	-1.5	-1.12	-2.05	-0.82	-1.63	-1.41	-2.21	-0.96	-1.91	-0.8	-1.44	-1.41	1.57	-0.52	-2.07
DC031	-0.66	-1.36	-1.61	-1.1	-1.53	-1.45	-1.33	-1.79	-1.62	-1.05	-1.84	-1.48	-1.9	-2.07	-2.22	-1.97	-2.14	-2.24	-0.66	-1.41	-1.86	-1.45	-2.58	-3.23	-1.19	-1.08	-1	-1	-1.1	-0.9	-2.5	-1.22	-0.56	-1.38	-1.54	-1.72	-2.56	-1.19	-1.14	-1.74	-2.37	-1.18	-1.5	-0.05	1.16	-1.54	2.12	0.7	-2.03
DC032	-0.61	-1.1	-0.99	-0.78	-1.11	-0.82	-1.27	-1.89	-1.25	-1.27	-1.98	-1.51	-0.77	-1.46	-1.05	-0.79	-1.63	-1.28	-0.07	-1.47	-1.71	-1.43	-3.83	-2.57	-1.08	-1.73	-1.07	-1.27	-1.24	-1.22	-3.89	-2.43	-0.68	-3.14	-1.66	-1.76	-3.1	-1.94	-0.9	-2.04	-2.56	-2.02	-1.4	0.01	0.97	-1.4	2.11	0.32	-2.69
DC033	-0.6	-1.27	-0.96	-1.22	-1.26	-1.17	-1.87	-2.14	-1.53	-2.04	-2.03	-1.97	-1.64	-2.52	-1.89	-2.25	-2.33	-2.54	-0.25	-1.51	-2	-1.44	-3.35	-3.18	-1.13	-1.17	-1.01	-1	-1.05	-1.13	-3.39	-2	-1.66	-2.44	-1.65	-2.3	-2.86	-1.75	-1.74	-1.4	-2.41	-2.2	-1.45	-0.09	0.99	-1.54	2.08	0.48	-2.56
DC034	0.5	-0.5	-0.71	0.14	-1.02	-0.32	-0.72	-0.78	-1.42	-0.99	-0.51	-0.82	0.02	-0.4	-1.09	-0.82	-0.38	-0.39	-0.13	-0.03	0.31	0.04	-0.47	-0.13	-0.95	-0.28	-1	-1	-0.99	-0.22	0.04	0.4	0.26	0.22	-0.05	-0.42	-0.18	0.06	0.18	-0.22	-0.7	-0.47	0.01	0.13	1.64	-0.04	-0.32	0.14	-0.23
DC035	-0.13	-0.65	-0.64	0.02	-1.11	-1.4	-1.48	-0.98	-0.85	-1.15	-0.9	-0.66	-1.33	-1.07	-1.5	-0.84	-0.93	-1.28	-0.47	-0.6	-0.37	-0.88	-1.46	-1.25	-0.77	-0.37	-1	-1	-1.06	-0.53	-0.96	-0.03	-0.45	0.03	-1.14	-1.1	-0.09	-0.08	-0.8	-0.14	-1.14	-1.06	-0.93	-0.23	0.9	-0.85	-1.09	-0.02	-0.81
DC036	-0.74	-1.02	-1.34	-1.3	-1.42	-1.41	-1.81	-1.86	-1.95	-1.76	-1.81	-1.71	-0.9	-1.31	-1.24	-1.38	-1.33	-1.79	-0.38	-1.64	-1.05	-1.34	-2.3	-2.78	-1.27	-0.15	-1	-1	-1	-0.99	-2.46	-1.12	-1.28	-1.36	-1.58	-2.47	-2.68	-0.81	-1.67	-1.13	-2.32	-1.26	-1.54	0.12	1.41	-1.05	1.92	0.13	-1.8
DC037	0.16	-0.02	-0.78	-0.96	-1.04	-0.65	-0.76	-0.85	-0.66	-0.73	-0.85	-0.31	-1.45	-0.41	-1.03	-0.74	-0.62	-0.41	-0.22	-1.29	-0.73	-1.27	-1.75	-1.45	-1.15	-1.6	-1.37	-0.87	-0.98	-1.31	-2.06	-1.24	-0.92	-0.94	-1.46	-1.97	-1.55	-1.14	-1.29	-1.04	-1.83	-1.68	-1.18	-0.62	-0.41	-1.01	-0.77	-1.34	-1.61
DC038	1.31	-0.58	-0.3	-0.11	-0.49	-0.53	-0.62	-2.16	-2.42	-1.3	-1.66	-1.53	-0.69	-1.35	-1.56	-1.1	-1.25	-1.28	0.81	-1.32	-1.33	0.02	-1.37	0.04	1.01	0.45	1	1	0.84	-1.02	-0.09	0.77	0.09	1	-0.88	-1.45	0.62	-0.15	0.37	1	-0.35	-1.71	-0.43	0.29	1.2	-0.01	2.03	0.53	-1.16
DC039	2.19	1.08	0.84	-0.02	1.11	0.38	-0.04	0.36	0.16	-0.65	0.8	0.24	0.16	0.52	0.25	-0.24	0.93	0.48	1.48	0.3	0.35	0.92	0.56	0.82	0.98	0.45	1	1	1.18	-0.85	0.85	0.88	0.25	1	0.45	0.43	0.89	0.01	0.36	1	0.67	0.08	0.87	1.21	1.38	0.92	1.17	0.65	0.7
DC040	0.13	-1.31	-1.24	-0.6	-1.71	-1.82	-1.35	-1.13	-1.37	-1.62	-1.94	-1.93	-1.62	-1.3	-1.64	-1.32	-1.9	-2.18	-0.19	-1.59	-1.52	-1.78	-2.47	-2.18	-1.05	-1.44	-1	-1	-1.18	-1.25	-2.38	-1.1	-1.69	-1.82	-1.38	-2.1	-1.08	-1.19	-1.41	-1.18	-1.31	-2.1	-1.64	-1.78	-1.32	-1.26	0.99	-1.17	-1.98
DC041	0.4	0.67	0.14	-0.42	0.13	-0.07	-1.59	-1.27	-1.2	-1.47	-1.61	-1.36	-1.71	-1.59	-1.68	-1.55	-1.63	-2.02	0.44	-1.19	-1.44	-1.3	-1.84	-1.83	-0.99	-0.17	-1	-1	-1	-0.68	-2.2	-0.54	-1.59	-1.42	-1.5	-1.65	-1.74	-0.23	-1.6	-1.19	-1.74	-1.12	-1.15	0.69	-1.2	-0.99	-1.25	-0.3	-1.43
DC042	-0.15	-0.79	-1.03	-0.9	-1.35	-1.06	-1.16	-3.52	-2.53	-1.52	-3.01	-2.47	-1.37	-1.75	-1.33	-1.62	-1.8	-1.52	0.24	-1.93	-1.7	-1.8	-3.04	-2.9	-1.21	-1	-1	-1.08	-1.02	0.49	-2.87	-2.33	-1.52	-2.51	-1.48	-0.75	-2.48	-2.36	-1.28	-1.5	-2.13	0.14	-1.46	0.83	1.18	-1.38	2.08	0.19	-2.52
DC043	0.68	-0.63	-0.87	-0.25	-0.62	-1.25	-0.51	-1.87	-1.3	-0.98	-1.45	-1.18	-0.59	-1.77	-2.02	-0.95	-1.4	-1.62	0.26	-1.33	-1.4	-1.72	-2.28	-2.46	-0.98	-0.81	-0.96	-1	-0.98	-0.76	-2.04	-0.05	-1.75	-1.82	-1.05	-0.84	-1.47	0.08	-0.65	-1.32	-1.01	-0.68	-1.64	-0.48	0.72	-1.47	-1.79	-0.62	-1.89
DC044	-0.45	-1.15	-1	-0.83	-1.25	-1.07	-2.02	-2.39	-2.09	-1.71	-1.95	-1.61	-1.54	-2.92	-2.55	-2.23	-2.67	-2.84	-0.15	-1.53	-2.23	-1.5	-3.32	-3.33	-1.19	-0.74	-1.01	-1	-1.17	-1.26	-3.17	-1.4	-1.41	-2.3	-1.63	-2.4	-2.55	-0.86	-1.42	-1.44	-2.12	-1.88	-1.39	-0.19	0.87	-1.43	1.94	0.2	-2.48
DC045	0.05	-0.76	-0.73	-0.86	-1.26	-0.89	-1.01	-3.23	-2.14	-1.47	-2.72	-2.28	0.32	-2.14	-1.57	0.11	-1.8	-1.37	0.38	-1.76	-0.86	-1.38	-2.41	-1.61	-1.33	-1	-1	-1.04	-1	0.82	-2.29	-2.15	-1.34	-2.15	-1.42	-0.18	-1.31	-2.08	-0.86	-0.91	-1.33	-0.35	-1.33	0.95	1.23	-1.11	2.11	0.27	-2.12
DC046	-0.22	-1.26	-1.08	-0.7	-1.27	-1.11	-1.3	-2.42	-1.85	-1.51	-2.1	-1.64	-1.01	-2.52	-1.77	-1.52	-2.35	-1.98	-0.61	-1.59	-1.42	-2.11	-4.08	-3.16	-1.32	-1.55	-1.01	-1	-1.26	-1.43	-3.83	-2.04	-1.36	-2.92	-1.88	-3.49	-2.76	-1.65	-1.09	-1.76	-2.66	-2.69	-2.51	-1.19	0.34	-1.71	1.64	-0.85	-2.26
DC047	0.23	-0.53	-0.62	-0.33	-0.73	-0.43	-1.47	-1.94	-1.68	-1.59	-1.74	-1.59	-1.44	-2.12	-2.08	-2.11	-2	-2.51	0.51	-1.51	-1.69	-0.96	-2.38	-2.68	-1.3	0.34	-1	-1	-0.99	-1.08	-2.53	-1.11	-1.34	-1.66	-1.53	-2.15	-2.46	-0.72	-1.72	-1.38	-2.25	-1.2	-1.01	-0.07	1.27	-1.09	2.2	-0.56	-2
DC048	-0.83	-1.44	-1.46	-1.26	-1.65	-1.44	-1.63	-2.36	-1.94	-1.85	-2.01	-1.78	-1.41	-2.74	-2.35	-2.28	-2.66	-2.97	-0.4	-1.56	-2.05	-1.43	-2.89	-3.04	-1.3	-0.74	-1	-1	-0.99	-1.89	-2.97	-1.45	-1.18	-1.86	-1.68	-2.64	-2.62	-1.26	-1.62	-1.57	-2.37	-2.08	-1.56	-0.17	0.96	-1.46	2.07	0.3	-2.24
DC049	1.52	1.2	1.85	1.37	0.62	1.17	0.73	2.22	2.37	1.54	1.9	2.33	1.17	1.42	2	1.07	1.35	1.76	1.26	1.94	1.3	0.84	0.28	0.6	1	0.18	-0.32	1	-0.56	-0.39	-0.21	0.64	0.95	1	-1.15	0.65	0.76	0.94	0.8	1	-0.42	0.51	0.77	1.23	1.15	0.84	0.54	0.8	0.63
DC050	-0.64	-1.2	-1.29	-1.78	-1.97	-1.89	-1.57	-2.02	-1.75	-1.76	-1.78	-1.72	-1.34	-2.7	-2.43	-2.14	-2.36	-2.79	-0.9	-1.6	-1.63	-1.86	-2.92	-2.74	-1.13	-1.88	-1.18	-1	-1.1	-1.38	-3.27	-1.86	-1.31	-2.46	-1.64	-2.77	-2.68	-1.72	-1.35	-1.73	-2.2	-2.35	-1.69	-1.04	0.22	-1.56	1.47	-1.3	-2.35
DC051	0.52	-0.17	-0.2	-0.85	-0.65	-0.42	-1.51	-0.95	-1.31	-1.58	-1.03	-1.42	-1.26	-1.11	-1.45	-1.75	-1	-1.81	-0.74	-1.27	-1.05	-1.88	-1.68	-2.12	-1.16	-1.6	-1	-1	-0.98	-1	-2.15	-1.17	-1.33	-1.37	-1.44	-1.77	-2.16	-1.2	-1.61	-1.29	-2.01	-1.11	-1.63	-0.56	0.72	-1.55	-1.06	-0.51	-1.62
DC052	-0.55	-0.22	-1.06	-0.83	-0.94	-1.16	-1.86	-1.2	-1.58	-1.62	-1.64	-1.7	-1.36	-1.12	-1.37	-1.65	-1.56	-2.02	-0.55	-1.4	-1.42	-1.37	-2.42	-2.96	-1.18	-1.58	-1	-1.01	-1.01	-1.11	-2.75	-1.84	-1.83	-2.01	-1.52	-1.95	-2.75	-2.07	-1.82	-1.03	-2.29	-1.5	-1.46	-0.25	1.23	-1.3	2.14	0.29	-2.27
DC053	0.56	-0.15	-0.26	-0.44	-0.64	-0.61	-0.16	-0.96	-0.35	-0.32	-0.93	-0.3	-0.34	-0.58	-0.54	-0.75	-0.84	-0.64	0.32	-0.69	-0.83	-1.82	-3.92	-2.54	-1.1	-0.98	-0.76	-1.3	-1.06	-0.97	-4.5	-2.61	-1.37	-3.42	-1.68	-1.33	-3.67	-1.39	-1.19	-2.1	-2.28	-1.02	-1.64	0.42	0.71	-1.43	1.96	0.05	-2.63
DC054	-0.53	-1	-1.18	-1.35	-1.23	-1.12	-1.53	-2.04	-1.78	-1.46	-1.68	-1.34	-1.1	-1.75	-1.68	-1.72	-1.58	-1.9	-0.1	-1.15	-1.21	-2.57	-3.68	-3.34	-1.06	-1.27	-0.99	-1	-1.5	-1.04	-4.03	-2.17	-1.68	-2.86	-1.78	-2.71	-2.96	-1.52	-1.62	-1.54	-2.42	-2.76	-2.8	-0.82	-0.05	-2	1.4	-1.05	-2.72
DC055	-0.24	-1.91	-1.3	-0.71	-1.18	-1.45	-1.79	-2.63	-2.67	-1.62	-2.29	-2.1	-2.01	-2.38	-2.74	-1.66	-2.09	-2.46	-0.8	-1.46	-1.53	-1.9	-3.26	-2.63	-0.92	-1.38	-1	-1	-1.09	-1.41	-2.85	-1.02	-1.97	-1.93	-1.43	-2.58	-1.53	-1.22	-1.53	-1.34	-1.55	-2.48	-1.62	-1.01	0.74	-1.42	-1.81	-1.1	-2.47
DC056	-0.19	-0.75	-1.13	-1.17	-1.21	-1.46	-0.52	-1.83	-1.24	-0.79	-1.64	-1.24	-0.94	-1.62	-1.6	-1.46	-1.47	-1.78	-0.26	-1.39	-1	-1.63	-3.29	-2.58	-1.07	-1.23	-1.69	-1	-1.54	-0.93	-3.9	-2.32	-2.17	-2.62	-1.69	-2.5	-2.69	-1.51	-1.35	-1.76	-1.98	-2.5	-2.11	-0.37	-0.08	-1.46	-2.41	-0.55	-2.58
DC057	-0.71	-0.82	-1.34	-1.22	-1.55	-1.82	-1.47	-1.89	-1.98	-1.63	-2.13	-2.09	-1.49	-1.39	-1.61	-1.88	-1.72	-2.13	-0.4	-1.39	-1.15	-1.16	-2.24	-1.61	-1.09	-1.43	-1.67	-1	-1.49	-1.37	-2.79	-1.38	-1.17	-1.9	-1.63	-2.25	-1.78	-1.35	-1.03	-1.32	-1.86	-2.45	-1.2	-1.14	-0.16	-0.67	1.49	-1.9	-1.95
DC058	0.38	0.68	-0.5	-0.69	-0.99	-0.65	-0.85	-1.35	-2.17	-1.99	-1.71	-1.99	-0.29	-0.86	-1.24	-1.32	-1.64	-1.72	-0.27	-1.82	-1.95	0.39	-0.94	0.2	0.96	-0.69	-1.52	1	-0.67	-1.06	-0.53	-0.1	-1.07	1	-1.15	-2.08	0.38	-0.84	-0.26	1	-0.98	-1.81	0.02	0.11	0.36	0.31	0.19	-0.6	-0.87
DC059	-0.45	-1.07	-1.06	-0.97	-1.79	-1.75	-1.4	-2.46	-2.08	-1.69	-2.3	-1.84	-1.62	-2.02	-1.86	-1.95	-2.09	-1.97	-0.46	-1.55	-1.23	-1.76	-3.26	-2.6	-1.17	-1.75	-1.2	-1.07	-1.2	-1.28	-3.56	-2.04	-1.04	-2.76	-1.69	-2.81	-2.37	-1.65	-0.36	-1.67	-2.04	-2.56	-1.56	-1.04	0.24	-1.33	1.39	-2.38	-2.43
DC060	0.56	-0.08	-0.29	-0.19	-0.19	-0.18	-0.64	-1.12	-1.18	-0.99	-1.4	-1.11	-0.61	-0.84	-0.74	-0.6	-1.09	-0.86	1.12	-1.09	-0.84	-1.42	-4.32	-2.91	-1.12	-1.25	-1.11	-1.3	-1.5	-1.06	-3.94	-1.66	-1.46	-2.76	-1.77	-2.12	-2.98	-1.39	-1.05	-1.84	-2.43	-1.69	-1.5	0.85	0.94	-1.31	2.1	0.3	-2.61
DC061	0	-0.75	-1.05	-0.55	-1.22	-0.9	-0.35	-1.31	-0.8	-0.46	-1.26	-0.5	-0.7	-1.06	-1.11	-0.61	-1.16	-0.88	0.1	-1.2	-1.01	-1.84	-3.58	-2.8	-1.11	-0.98	-1.14	-1.11	-1.12	-1	-4.22	-1.79	-2.77	-2.65	-1.52	-1.38	-3.17	-0.99	-1.39	-1.88	-2.2	-2.2	-2.25	-0.2	0.1	-1.65	1.53	0	-2.64
DC062	-0.17	0.03	-0.35	-0.79	-0.44	-0.61	-1.25	-1.35	-1.01	-1.76	-1.47	-1.45	-1.36	-1.62	-1.57	-1.94	-2.16	-2.43	0.82	-1.56	-2.25	-0.97	-3.06	-2.7	-1.28	-1	-1	-1.01	-0.99	-1.07	-3.45	-2.13	-1.51	-2.73	-1.59	-2.13	-2.76	-1.97	-1.72	-1.55	-2.36	-1.68	-0.99	0.77	1.27	-0.63	2.21	-0.56	-2.66
DC063	-0.41	-1.23	-1.23	-1.38	-1.49	-1.34	-1.32	-2.1	-1.64	-1.41	-1.59	-1.32	-1.65	-2.33	-2.25	-1.73	-1.96	-2.1	-0.42	-1.55	-1.59	-1.47	-3.31	-3.02	-1.02	-1.11	-1	-1	-1.13	-1.08	-3.2	-1.57	-1.61	-2.13	-1.57	-2.5	-1.9	-1.33	-1.32	-1.46	-1.75	-2.1	-1.41	-0.16	0.99	-1.38	1.93	-0.03	-2.49
DC064	0.43	0.09	-1	-0.72	-0.15	-0.46	-0.3	0.18	0.19	-0.08	-0.22	0.09	-0.43	0.1	-0.45	-0.23	-0.01	-0.21	1.29	0.57	0.72	0.94	0.62	0.95	0.93	0.83	-0.29	1	1	-1.02	0.9	1.4	1.18	1	1	0.29	0.86	0.99	0.86	1	1	-0.2	0.94	1.33	0.89	0.95	1	-0.2	0.78
DC065	0.43	0.09	-1	-0.72	-0.15	-0.46	-0.3	0.18	0.19	-0.08	-0.22	0.09	-0.43	0.1	-0.45	-0.23	-0.01	-0.21	1.29	0.57	0.72	0.94	0.62	0.95	0.93	0.83	-0.29	1	1	-1.02	0.9	1.4	1.18	1	1	0.29	0.86	0.99	0.86	1	1	-0.2	0.94	1.33	0.89	0.95	1	-0.2	0.78
DC066	-0.13	-0.85	-1.1	-0.85	-1.53	-1.55	-1.79	-1.84	-2.06	-1.83	-1.84	-1.86	-1.07	-1.4	-1.33	-1.52	-1.43	-1.83	-0.33	-1.63	-1.16	-1.34	-2.21	-2.75	-1.27	-0.83	-1	-1	-1	-0.99	-2.28	-1.26	-1.36	-1.47	-1.49	-2.35	-2.63	-1.72	-1.7	-1.1	-2.26	-1.27	-1.54	0.08	1.41	-0.8	1.92	0.13	-1.84
DC067	0.45	-0.65	-0.91	-0.92	-1.79	-1.56	-0.04	-0.94	-0.87	-0.53	-0.65	-0.86	-0.29	-0.34	-0.58	-0.3	-0.27	-0.27	-0.01	-0.53	-0.29	-1.49	-3.14	-2.37	-1.05	-1.02	1	-0.95	-1.15	-1.02	-4.05	-1.92	0.84	-2.42	-1.54	-1.14	-2.92	-1.01	1.71	-1.65	-2.13	-1.98	-2.11	-0.25	-0.39	-1.62	-2.1	-0.33	-2.78
DC068	-0.08	-0.43	-0.88	-1.09	-1.1	-1.13	-1.13	-0.21	-0.29	-2.1	-0.82	-0.88	-1.09	-0.4	-0.98	-1.92	-0.99	-1.03	-0.58	-1.53	-1.36	-0.36	-1.26	-0.88	-0.86	-1.14	-1.17	-1	-0.82	-1.17	-0.93	-0.15	-1.84	-1.53	0.18	-1.98	-0.82	-0.94	-1.51	-1.2	-0.16	-2.01	-0.58	-0.67	0.86	-0.57	-0.83	-1.05	-1.38
DC069	-0.15	-0.82	-0.63	-0.61	-0.55	-0.54	-1.22	-1.9	-1.56	-2.2	-1.26	-1.04	-0.87	-1.38	-0.84	-1.68	-0.93	-0.78	0.76	-1.51	-1.04	-0.24	-1.45	-0.74	-0.87	-0.42	-1.17	-1	-0.36	-1.12	-0.95	1.04	-1.87	-1.53	0.25	-2.16	-0.59	-0.69	-1.47	-1.15	0.04	-2.29	-0.51	-0.29	0.75	-0.51	-0.51	-1.11	-1.53
DC070	0.37	-1.92	-1.59	-0.48	-1.5	-1.31	-1.19	-1.98	-1.53	-0.5	-1.4	-0.77	-1.49	-1.81	-1.62	-1.19	-1.38	-1.07	0.18	-1.16	-1.1	-0.03	-0.7	-0.29	0.91	-0.05	-0.32	1	0	-1.45	0.74	0.86	0.14	1	0.65	-1.55	1.03	-0.16	0.03	1	0.67	-1.7	0.39	0.03	1.28	0.69	1.28	-1.78	-0.02
DC071	-0.63	-1	-1.07	-1.25	-1.29	-1.25	-1.8	-2.33	-2.2	-1	-1.85	-1.34	-1.12	-1.76	-1.29	-1.21	-1.78	-1.16	-0.75	-1.49	-1.13	-1.02	-2.62	-1.84	-1	-1.17	-0.92	-1	-1.51	-1.35	-1.79	-0.73	0.3	-0.55	-0.78	-3.13	-1.29	-1.08	0.17	-0.55	-1	-2.73	-0.63	-0.86	-0.59	-0.72	1.6	-2.02	-2.37
DC072	0.34	0.76	0.57	0.9	1.37	1.15	-2.1	-1.23	-2.05	-0.87	-1.54	-1.5	-0.77	-0.25	-0.92	-0.19	-0.76	-0.6	1.86	-1.36	-0.98	-1.32	-1.98	-1.18	-0.91	-0.96	1.01	-1.01	-1.26	-1.51	-1.17	-0.41	0.37	0.6	-1.22	-2.42	-0.03	-0.9	-0.19	0.5	-1.29	-2.34	-0.88	-0.53	0.89	-1.29	-1.43	-0.98	-1.48
DC073	-0.63	-0.87	-0.94	-0.89	-1.04	-0.99	-1.89	-2.33	-2.22	-1.56	-2	-1.51	-1.75	-1.69	-1.62	-1.46	-2.01	-1.46	-0.7	-1.66	-1.5	-1.71	-2.84	-2.26	-1	-0.9	-1.07	-1	-1.51	-1.33	-2.93	-0.4	-0.09	-0.55	-1.77	-2.61	-1.83	-0.42	-0.71	-0.55	-2.08	-2.5	-1.6	-0.66	-0.43	-1.55	1.43	-1.33	-1.66
DC074	-0.63	-1	-1.07	-1.25	-1.29	-1.25	-1.8	-2.33	-2.2	-1	-1.85	-1.34	-1.12	-1.76	-1.29	-1.21	-1.78	-1.16	-0.75	-1.49	-1.13	-1.02	-2.62	-1.84	-1	-1.17	-0.92	-1	-1.51	-1.35	-1.79	-0.73	0.3	-0.55	-0.78	-3.13	-1.29	-1.08	0.17	-0.55	-1	-2.73	-0.63	-0.86	-0.59	-0.72	1.6	-2.02	-2.37
DC075	-0.55	-1.04	-0.97	-1.08	-1.17	-0.98	-0.5	-1.96	-1.29	-1.21	-1.8	-1.16	-0.83	-1.63	-1.23	-1.43	-2.17	-1.46	-0.73	-1.66	-1.6	-2.28	-4.08	-3.39	-1	-1.17	-1	-1	-1.51	-1.18	-3.64	-1.07	-0.16	-2.32	-1.73	-3.03	-2.52	-1	-0.67	-1.7	-2.15	-2.77	-2.45	-0.71	-1	-2.04	1.34	-1.12	-1.89
DC076	0.51	-1.49	-1.48	-0.33	-1.45	-1.06	-1.84	-2.51	-2.85	-1.92	-2.45	-2.07	-1.39	-1.82	-1.96	-1.68	-1.93	-1.75	-0.82	-2.38	-1.9	-1.34	-3.25	-2.35	0.88	0.25	-0.9	1	-0.21	-1.15	-0.88	0.9	-0.86	1	-0.88	-2.74	0.64	0.24	-1.38	1	-1.1	-2.56	-0.9	0.14	-0.03	0.05	-1.49	-1.09	-1.57
DC077	0.37	-0.01	-0.09	-0.11	-0.26	-0.21	-1.04	-0.35	-0.29	-0.73	-1.09	-0.33	-1.23	0.08	0.05	-1.11	-0.81	-0.63	0.62	-1.82	-1.59	-1.03	-2.41	-1.83	0.91	0.33	-1.14	1	0.08	-1.18	-0.51	1.01	-0.95	1	-0.74	-1.83	0.74	0.68	-1.49	1	-0.61	-1.96	-0.49	0.54	1.23	0.28	-0.99	-0.87	-0.92
DC078	0.61	-0.52	-0.13	0.37	-0.58	0.12	0.03	-0.63	-0.08	-1.05	-0.87	-0.85	0.12	-0.24	0.14	-0.44	-0.69	-0.24	0.55	-1.35	-0.57	-0.49	-1.01	-0.71	-0.88	-0.66	-1	-0.93	-0.56	-1.26	0.2	-0.7	-0.84	-0.68	0.33	-1.39	-0.09	-1.18	-0.97	-0.22	-0.11	-1.31	-0.17	0.49	1.17	0.23	-0.45	-0.34	-0.6
DC079	-0.53	-1	-1	-1	-1.03	-1.11	-1.31	-1.57	-1.29	-1.92	-1.21	-1.39	-1.6	-1.23	-1.34	-1.83	-1.28	-1.53	-0.4	-1.23	-1.13	-0.95	-1.49	-0.88	-0.72	-1.18	-1.1	-1	-1.09	-1.08	-2.3	-1.44	-1.57	-1.3	-1.55	-2.64	-0.83	-1.21	-1.25	-0.82	-1.67	-2.27	-0.79	-0.26	0.49	-0.9	1.46	-1.35	-1.36
DC080	-0.54	-1.69	-1.54	-1.33	-1.25	-1.25	-0.99	-2.33	-1.6	-1.1	-1.76	-1.12	-1.35	-2.8	-2.44	-1.62	-2.14	-2.1	-0.47	-1.56	-1.35	-2.57	-3.9	-3.37	-1.1	-1.41	-0.93	-1	-1.28	-1.07	-3.71	-2.02	-1.44	-2.71	-1.71	-3.49	-2.58	-1.58	-0.42	-1.69	-2.08	-2.66	-3	-0.93	-0.45	-2.03	1.28	-1.64	-2.4
DC081	1.15	-0.24	-0.45	0.35	-0.26	-0.15	-0.38	-0.32	-0.77	-0.56	-0.44	-0.32	-0.13	-0.28	-0.81	-0.31	-0.23	-0.05	-0.08	-0.68	-0.51	-0.65	-1.5	-1.07	-0.87	-0.68	-1.15	-1	-0.36	-1.17	-1.38	0.24	-1.51	-1.14	-0.98	-0.43	-0.39	0.17	-1.38	-0.79	-0.78	-0.85	-0.85	-0.13	-1.17	-1.09	1.05	-1.1	-0.97
DC082	-0.53	-1	-1	-1	-1.03	-1.11	-1.31	-1.57	-1.29	-1.92	-1.21	-1.39	-1.6	-1.23	-1.34	-1.83	-1.28	-1.54	-0.4	-1.23	-1.13	-0.95	-1.49	-0.88	-0.72	-1.18	-1.1	-1	-1.09	-1.08	-2.3	-1.44	-1.57	-1.3	-1.55	-2.64	-0.83	-1.21	-1.25	-0.82	-1.67	-2.27	-0.79	-0.26	0.49	-0.9	1.46	-1.35	-1.36
DC083	0.3	0.1	-0.52	-0.26	-0.51	-0.48	-1.06	-1.57	-1.2	-1.15	-1.15	-1.15	-0.14	-0.98	-0.92	-0.63	-0.9	-1.16	-0.18	-1.46	-1.1	-1.33	-2.22	-1.7	-1.06	-1.54	-1	-1	-1.05	-1.13	-2.72	-1.39	-1.27	-2.01	-1.45	-1.93	-1.43	-1.29	-1.26	-1.04	-1.41	-1.87	-1.2	-0.79	0.8	-1.21	-0.9	-1.52	-2.14
DC084	0.29	-1.05	-0.77	-0.52	-1.1	-1.05	-1.21	-1.53	-0.96	-0.91	-1.31	-0.69	-0.19	-0.4	-0.11	-0.12	-0.42	-0.26	0.41	-1	-1	-1.06	-3.46	-1.65	-1.49	-1	-1	-1.05	-1	0.96	-2.02	-1.51	-1	-1.86	-0.9	0.72	-2.54	-1.08	-1.53	-0.84	-2.21	0.89	-1.23	1.01	1.19	-1.07	2.12	-1.01	-2.81
DC085	-0.02	-0.1	-0.15	-0.54	-0.41	-0.58	-0.54	-0.32	-0.27	-1.09	-1.09	-0.7	-0.7	-0.25	-0.44	-1.56	-1.49	-1.24	0.01	-1.49	-0.92	-2.01	-3.78	-3.03	-1.17	-1.21	-1.38	-1.55	-1.3	-0.95	-4.22	-2.72	-0.74	-3.83	-1.61	-3.39	-3.38	-1.69	-0.35	-2.49	-2.16	-2.47	-2.24	-0.77	-0.19	-1.79	1.43	-1.33	-2.25
DC086	0.14	-1.13	-1.46	-0.67	-1.24	-1.43	-0.25	-0.94	-0.47	-0.63	-0.38	-0.09	-0.88	-1.52	-1.76	-0.89	-0.95	-1.33	-0.13	-0.02	-0.65	-1.54	-2.69	-2.34	-0.78	-1.35	-1.14	-1	-1.29	-0.94	-3.06	-1.68	-0.23	0.17	-1.38	-2.65	-1.79	-1.52	0.61	-1	-1.35	-2.21	-1.79	-0.29	0.27	-1.48	-2.34	-0.65	-2.45
DC087	1.66	-0.06	0.15	0.35	0.18	0.99	1.22	1.16	1.2	1.04	1.36	1.38	-0.04	0.22	-0.02	-0.55	0.29	0.04	1.71	1.49	0.45	1.21	0.64	1.05	0.99	1.09	1	1	-0.47	0.85	1	0.59	0.11	1	1	-0.57	0.92	-0.14	0.6	1	0.66	0	1.43	1.79	2.2	1.03	1.1	1.45	1.42
DC088	0.01	0.19	-0.31	-0.1	-0.68	-1.06	-1.14	-1.58	-0.96	-1.48	-1.29	-1.23	-1.5	-1.13	-1.43	-1.89	-1.34	-2.09	-0.14	-1.43	-1.25	-1.89	-2.11	-2.22	-1.11	-0.5	-1.01	-1	-1.03	-0.6	-2.48	-1.35	-1.12	-1.48	-1.55	-2.25	-2.1	-1.11	-1.57	-1.47	-2.12	-1.42	-1.75	-0.38	1.01	-1.39	1.37	-1.2	-1.78
DC089	0.4	-1.25	-0.85	-0.39	-1.09	-0.7	-1.08	-1.28	-0.91	-1.12	-1.07	-0.89	-0.7	-0.75	-0.76	-1.33	-0.92	-0.87	-0.55	-1.56	-1.09	-1.49	-2.01	-1.67	-1.07	-1.63	-1.17	-1	-1.07	-1.05	-2.81	-2.13	-1.83	-2.22	-1.45	-2.34	-1.64	-1.65	-1.45	-1.32	-1.42	-2.04	-1.81	-0.98	0.37	-1.42	1.25	-2.04	-2.17
DC090	0.65	-0.46	-0.24	-0.64	-0.8	-0.84	-0.6	-1.38	-1.17	-1	-0.86	-0.84	-0.68	-1.19	-0.83	-0.33	-0.94	-0.92	0.28	-0.96	-0.91	-0.45	-1.52	-0.99	-0.75	-1.15	-1.01	-0.99	-1.09	-1.13	-1.02	-0.86	-0.89	-0.6	-1.06	-1.89	-0.27	-1.09	-1.02	-0.5	-0.81	-2.02	-0.12	-0.4	0.65	-0.4	-0.61	-1.23	-1.13
DC091	1.1	0.67	0.72	0.68	0.94	0.78	0.95	0.94	0.89	1.07	1.2	1.35	0.48	0.09	0.09	0.28	0.57	0.46	1.4	1.46	0.98	0.49	1.01	0.78	1.08	0.61	1	1	1	-1	1.18	0.92	0.86	1	1	-0.56	1.03	-0.1	1.16	1	1	-0.71	0.49	1.05	0.92	1.03	0.42	-0.16	1.35
DC092	0.53	-0.93	0.22	0.93	-1.36	-0.38	-0.84	-1.21	-0.84	-0.45	-1.06	-0.46	-2.07	-1.17	-0.96	-0.57	-1.07	-0.61	0.25	-1.36	-1.1	-1.13	-1.41	-1.73	-1.07	-0.12	-1	-1	-1.05	0.21	-1.69	-1.02	-1.81	-1.74	-0.92	-1.19	-1.4	-0.89	-1.56	-1.22	-1.34	-0.7	-0.8	0.1	1.16	-1.04	-1.27	0.63	-1.59
DC093	-0.27	-1	-1	-1	-1	-1	-1.5	-1.3	-0.92	-1.06	-1.27	-1.08	-1	-0.96	-1	-1	-1	-0.99	-0.13	-1.53	-1	-1.8	-2.4	-1.96	-1.07	-1.53	-0.77	-1	-0.9	-1.16	-2.79	-1.61	-1.65	-2.23	-1.43	-2.61	-1.72	-1.53	-1.08	-1.31	-1.58	-2.14	-1.76	-1.2	1.11	-1.67	1.2	-1.74	-2.5
DC094	-0.27	-1	-1	-1	-1	-1	-1.5	-1.3	-0.92	-1.06	-1.27	-1.08	-1	-0.96	-1	-1	-1	-0.99	-0.13	-1.53	-1	-1.8	-2.4	-1.96	-1.07	-1.53	-0.77	-1	-0.9	-1.16	-2.79	-1.61	-1.65	-2.23	-1.43	-2.61	-1.72	-1.53	-1.08	-1.31	-1.58	-2.14	-1.76	-1.2	1.11	-1.67	1.2	-1.74	-2.5
DC095	-1.13	-1.51	-2.23	-2.1	-1.54	-2.01	-1.53	-2.14	-1.92	-2.36	-2.26	-2.47	-1.58	-1.36	-1.92	-2.42	-1.67	-1.83	-1.17	-2.11	-1.79	-1.38	-1.7	-1.98	-1.33	-0.98	-1	-1	-0.28	-0.62	-2.99	-1.93	-1.33	-2.97	-1.02	-0.46	-2.09	-0.97	-1.44	-1.29	-0.44	-0.36	-2.17	-0.87	0.38	-2	1.13	-0.94	-2.49
DC096	-2.15	-1.09	-1.77	-0.71	-0.25	-0.93	-1.49	-0.2	-1.11	-0.61	0.18	0.07	-2.23	-0.33	-1.3	-0.88	-0.17	-0.46	0.4	0.36	-0.07	-0.33	0.03	0.18	0.99	-0.51	-0.53	1	-0.64	-1.07	-0.24	0.1	0.3	1	-1.15	-0.31	0.73	-0.2	-0.1	1	-0.43	-0.83	0.22	0.32	0.81	0.61	-0.51	-1.01	0.4
DC097	0.61	-1.05	-1.46	0.79	0.05	-0.06	0.41	-0.09	0.03	0.75	0.68	0.84	0.79	-0.08	-0.22	1.1	0.44	0.77	1.67	0.92	1.36	1.04	0.63	1.01	0.99	1.01	1	1	-0.9	0.89	0.76	0.76	0.86	1	0.35	0.51	0.78	1.51	1.04	1	-0.44	0.85	1.24	1.68	1.53	0.99	1.2	2.01	0.89
DC098	-0.47	-1	-1.26	-0.93	-0.82	-0.8	-0.94	-0.74	-1	-0.6	-0.33	-0.34	-1.14	-1.86	-1.7	-1.53	-1.19	-1.17	0.1	-0.41	-1.01	-1.46	0.17	-0.97	-1.5	-1	-1	-1.04	-1	0.99	0.45	-0.55	-0.43	-0.42	0.42	0.48	-0.37	-0.9	-0.38	-0.68	-0.36	1.11	-1.41	0.8	1.2	-1.43	2.03	-1.11	0.2
DC099	0.27	-1.11	-1.04	-0.48	-1.3	-1.14	-0.83	-2.96	-1.98	-1.32	-2.75	-2.21	-0.85	-2.15	-1.45	-1.02	-2.26	-1.55	0.22	-2.27	-1.9	-1.19	-1.71	-1.87	-1.51	-1	-1	-1.04	-1	1.03	-0.9	-2.66	-1.85	-1.65	-0.35	0.72	-1.21	-2.18	-1.17	-1.2	-1.04	1.43	-1.23	0.88	1.25	-1.17	2.1	-1.06	-2.01
DC100	0.48	0.61	-0.86	1.36	1.05	0.61	-1.1	0.39	-0.63	1.1	1.14	0.94	-1	1.21	-0.6	1.09	1.15	0.48	2.88	1.51	1.44	0.98	0.81	0.93	1.01	0.8	1.05	1	0.12	0.59	0.88	1.03	1.21	1	0.74	1.06	1.05	1.22	0.97	1	0.89	0.87	1.06	1.63	1.41	1	1.04	1.7	1.06
DC101	0.06	-1.29	-2.52	-0.29	-1.61	-2.91	-1.7	-0.5	-2.53	-1.24	-0.62	-1.37	-0.66	-1.2	-2.5	-0.24	-0.89	-1.43	0.09	-0.6	0.37	-0.79	-0.51	-1	-0.93	-0.02	-1	-1	-1.09	0.02	-0.74	0.15	-1.01	-0.89	-0.67	0.25	-1.12	0.36	-0.73	-1.2	-0.78	0.41	-0.55	0.35	1.21	-0.85	-0.67	0.23	-0.63
DC102	0.01	-1.07	-1.19	-0.59	-1.38	-1.07	-1.86	-3.18	-2.06	-1.64	-2.35	-1.81	-1.28	-2.06	-1.32	-1.08	-1.87	-1.16	0.26	-1.47	-1.71	-1.33	-1.07	-1.8	-1.38	-1	-1	-1.04	-1	0.98	-1.28	-1.8	-0.58	-1.98	-0.71	1.02	-1.54	-2	-1.22	-1.24	-1.52	1.12	-1.26	0.88	1.22	-1.22	2.08	-1.09	-1.44
DC103	-0.08	-0.37	-0.83	-0.33	-0.09	-0.69	-1.16	-1.38	-1.83	-0.85	-0.59	-0.7	-2.14	-1.31	-2.14	-0.8	-0.79	-0.86	0.32	-0.49	-0.76	-0.9	-0.39	-1.07	-1.23	0.5	-1	-1	-0.91	0.89	-0.4	-0.19	-0.46	-0.44	-0.4	-0.29	-0.77	0.04	-0.03	-0.79	-0.63	0.33	-0.91	0.08	1.19	-0.74	1.76	-0.94	-0.38
DC104	1.28	0.08	0.15	1.6	0.9	1.09	0.66	0.37	0.21	1.13	1.25	1.07	0.05	-0.71	-0.95	1.03	1.1	0.88	1.69	0.62	0.41	0.2	0.85	0.65	-0.96	1.95	-1	-0.93	-0.01	1.04	0.76	0.19	0.13	0.09	0.9	0.98	0.36	0.07	0.35	0.27	0.59	1.13	-0.48	1.51	1	0.08	0.89	1.34	0.78
DC105	1.82	1.33	1.39	1.81	1.78	2.4	0.08	0.18	0.26	0.45	0.6	0.73	0.84	0.02	0.03	1.05	0.81	1.29	2.19	0.63	1.1	0.38	0.85	0.73	-0.89	-1	-1	-0.93	-1	1.01	0.72	0.03	0.15	0.47	0.25	0.98	0.41	0	0.66	0.59	-0.5	1.2	0.12	2.46	1.17	0.52	1.83	1.62	0.83
DC106	0.35	0.16	0.05	-0.52	-0.23	-0.59	-0.85	-0.2	-0.35	-0.82	-0.44	-0.25	-0.24	-0.87	-0.56	-1.18	-1.25	-1.2	-0.27	-1.19	-1.73	-1.14	-1.63	-1.94	-0.83	-0.54	-1	-1	-0.81	-1.11	-0.89	-0.32	-1.29	-0.86	-0.8	-0.77	-0.39	-0.7	-0.55	-0.63	-0.76	-1.15	-0.97	0.1	1.18	-1.08	1.96	-1.24	-1.48
DC107	0	-0.88	-0.87	-1.03	0.08	-0.88	-1.04	-0.4	-0.24	-0.66	-0.32	-0.16	-1	-0.3	-0.21	-0.87	0.06	-0.03	0.75	-0.85	0.13	0.95	0.6	0.75	0.96	-1	1	1	-0.96	-1	0.14	-0.84	-0.49	1	-1.1	-0.78	0.46	-1.08	0.51	1	-0.77	-0.78	0.92	0.23	1.44	0.96	0.92	1.15	0.42
DC108	-0.8	-1.61	-1.86	-1.61	-1.19	-1.67	-1.75	-1.94	-1.76	-1.6	-1.78	-1.95	-1.78	-1.23	-1.83	-1.53	-1.18	-1.42	-0.88	-1.99	-1.64	-0.8	-0.33	-1	-1.19	-1.64	-1	-0.99	-0.97	-1	-1.15	-2.34	-1.59	-2	-0.49	-0.72	-1.26	-1.52	-1.26	-1.16	-0.41	-0.7	-1.27	-0.36	0.7	-1	0.66	-1.4	-1.12
DC109	-0.78	-1.64	-1.8	-1.41	-1.2	-1.62	-1.45	-1.78	-1.63	-1.45	-1.68	-1.85	-1.51	-1.19	-1.8	-1.45	-1.2	-1.58	-0.92	-1.92	-1.59	-0.8	-0.22	-0.78	-1.19	-1.64	-1	-0.99	-0.96	-1	-1.06	-2.35	-1.69	-1.97	-0.39	-0.49	-1.09	-1.65	-1.31	-1.12	-0.16	-0.6	-1.29	-0.38	0.78	-1.09	0.63	-1.38	-0.91
DC110	-0.8	-1.61	-1.86	-1.61	-1.19	-1.67	-1.75	-1.94	-1.76	-1.6	-1.78	-1.95	-1.78	-1.23	-1.83	-1.53	-1.18	-1.42	-0.88	-1.99	-1.64	-0.8	-0.33	-1	-1.19	-1.64	-1	-0.99	-0.97	-1	-1.15	-2.34	-1.59	-2	-0.49	-0.72	-1.26	-1.52	-1.26	-1.16	-0.41	-0.7	-1.27	-0.36	0.7	-1	0.66	-1.4	-1.12
DC111	-0.47	-1.33	-1.65	-1.3	-0.78	-1.32	-1.7	-1.54	-1.46	-1.44	-1.37	-1.45	-1.53	-1.04	-1.6	-1.5	-0.99	-1.32	-0.66	-1.67	-1.69	-0.36	0.02	-0.44	-1.19	-1.66	-1	-0.99	-0.97	-0.99	-0.54	-1.82	-1.25	-1.61	-0.12	-0.5	-0.85	-1.68	-1.04	-1.09	-0.34	-0.61	-0.72	-0.19	0.96	-0.3	0.76	-1.29	-0.52
DC112	-0.8	-1.61	-1.86	-1.61	-1.19	-1.67	-1.75	-1.94	-1.76	-1.6	-1.78	-1.95	-1.78	-1.23	-1.83	-1.53	-1.18	-1.42	-0.88	-1.99	-1.64	-0.8	-0.33	-1	-1.19	-1.64	-1	-0.99	-0.97	-1	-1.15	-2.34	-1.59	-2	-0.49	-0.72	-1.26	-1.52	-1.26	-1.16	-0.41	-0.7	-1.27	-0.36	0.7	-1	0.66	-1.4	-1.12
DC113	0.52	0.73	-0.42	-0.15	0.59	0	1.36	1.46	1.13	0.75	0.95	1.04	0.92	1.2	0.71	0.71	0.98	0.85	1.61	1.46	1.3	0.94	0.61	0.77	1	-0.12	1	1	-0.69	-0.5	0.41	0.48	0.93	1	-0.53	0.89	0.88	0.76	1.25	1	0.01	0.48	1.03	0.9	1.4	0.95	0.74	0.75	0.83
DC114	0.96	1.03	0.8	0.35	0.86	0.35	-0.44	-0.06	-0.4	-0.09	0.67	0.28	-0.25	0.53	-0.13	-0.03	0.72	-0.08	0.96	0.65	0.82	0.99	0.99	1	1.01	0.72	1	1	1	-0.87	1.05	1	0.83	1	1	0.52	0.96	0.56	1	1	1	0.21	1.07	1.65	1.12	1.03	1.01	0.77	1.1
DC115	0.25	-0.57	-0.79	0.03	-1.01	-0.68	-0.71	-1.54	-1.4	-0.36	-1.03	-0.79	-1.67	-0.73	-1.04	-0.22	-1.04	-0.4	-0.11	-0.52	-0.49	-1.09	0.37	-0.24	-0.87	0.38	-1	-1	-0.94	0.99	0.46	0.27	-0.31	-0.03	0.37	0.06	-0.11	-0.03	-0.2	-0.57	-0.25	0.68	-1.11	0.49	1.13	-1.17	1.73	-0.91	0.4
DC116	-0.15	0.05	-0.19	-0.13	0.26	0.24	0.59	0.76	0.97	1.03	1.17	1.37	0.17	0.52	0.58	0.46	0.9	0.76	2.31	1.47	1.13	0.98	1.03	0.94	1.01	0.73	1	1	-0.22	0.56	1.03	1.08	1.08	1	1.05	1.23	1.05	0.73	0.6	1	1.16	0.7	1.04	1.61	1.76	1	0.66	1.66	1.19
DC117	-0.15	0.05	-0.19	-0.13	0.26	0.24	0.59	0.76	0.97	1.03	1.17	1.37	0.17	0.52	0.58	0.46	0.9	0.76	2.31	1.47	1.13	0.98	1.03	0.94	1.01	0.73	1	1	-0.22	0.56	1.03	1.08	1.08	1	1.05	1.23	1.05	0.73	0.6	1	1.16	0.7	1.04	1.61	1.76	1	0.66	1.66	1.19
DC118	0.46	-0.17	0.55	0.03	-0.2	0.68	-1.41	-0.97	-0.47	-1.39	-0.7	-0.64	-0.88	-0.65	-0.03	-0.76	-0.52	-0.21	0.77	-0.59	-0.29	0.05	-0.32	0.07	-0.81	0.2	-1	-1	-0.95	0.16	-0.03	0.3	-0.12	0.09	-0.27	-0.67	0.21	-0.21	-0.21	-0.11	-0.12	-0.95	0.37	0.79	1.33	-0.02	1	1.26	-0.13
DC119	-1	-1	-1.25	-1	-1	-1	-1.27	-1	-0.91	-1	-1	-0.74	-1	-0.9	-1	-1	-1	-0.99	-0.35	-0.94	-1	-0.07	0.41	0.18	-0.98	-1	-1	-1	-0.49	-0.19	0.32	-0.46	-1	-0.28	0.02	-0.06	0.22	-1	-0.93	-0.01	0.93	-0.19	-1	0.02	0.74	-1	0.7	0.09	0.23
DC120	-1.47	-1.57	-1.58	-1.15	-1.95	-1.49	-1.25	-1.22	-1.1	-0.87	-1.02	-0.71	-1.93	-1.72	-2.09	-1.6	-1.79	-1.58	-1	-0.63	-1.18	-0.18	-0.36	-0.38	-0.87	-1.74	-1	-1	-0.71	-1.03	0.09	-0.13	-0.6	-0.46	0.28	-0.85	-0.01	-0.96	-0.81	-0.56	0.21	-1.06	-0.17	-1	1.12	-0.59	1.06	-1	-0.23
DC121	-1.28	-1.46	-1.7	-1.83	-1.49	-1.5	-1.07	-1.12	-1.25	-0.87	-1.08	-1.11	-1.44	-1.36	-1.57	-1.39	-1.4	-1.4	-1	-1.05	-1.39	-0.18	-0.29	-0.3	-0.87	-1.74	-1	-1	-0.71	-1.03	0.15	-0.06	-0.78	-0.25	0.06	-0.93	0.08	-0.93	-0.79	-0.36	0.2	-1	-0.17	-1	1.12	-0.59	1.06	-1	-0.18
DC122	-0.28	-1	-1	-1	-1.02	-1	-1	-1	-0.83	-1	-1	-0.66	-1	-0.88	-1	-1	-1	-0.97	0.05	-0.84	-1	1.04	0.4	0.83	0.99	-0.46	-0.99	1	-0.8	-0.97	0.52	0.17	-0.57	1	-0.36	-0.86	0.84	-0.53	-1	1	0.33	-0.84	1.2	0.61	1.41	1.01	1.13	-0.53	0.5
DC123	1.46	-0.02	-0.11	0.62	-0.05	-0.37	0.17	-0.52	-0.26	0.1	-0.5	-0.02	0.16	-0.85	-0.26	-0.05	-0.97	-0.64	0.22	-0.32	-0.71	-1.14	-1.78	-1.75	-1.01	-1.25	-1	-1	-0.69	-1	-3.05	-2.77	-0.8	0.02	-1.37	-0.97	-2.09	-1.62	-1.58	-0.95	-0.76	-1.1	-1.88	0	-0.04	-1.74	-1.83	-0.55	-2.83
DC124	1.68	0.12	0.54	1.32	0.43	0.87	0.65	0.06	0.29	1.32	0.15	0.68	0.74	0.31	0.52	1.35	0.17	0.45	1.75	1.12	1.26	0.93	0.71	0.85	0.99	1.01	1	1	-0.73	1.03	0.67	0.35	0.74	1	-0.2	0.84	0.9	0.84	1.07	1	0	0.82	0.94	1.95	1.4	0.94	0.73	1.42	0.88
DC125	0.69	0.24	0.37	-1	-0.76	-0.93	-2.14	-2.73	-2.88	-1.43	-2.27	-2.05	-1.65	-1.41	-1.26	-1.52	-1.77	-1.51	0.68	-1.6	-1.83	-1.14	-0.65	-2.36	-1.5	-1	-1	-1.05	-1	0.92	-0.33	-1.29	-1.26	-1.39	-0.2	0.36	-1.84	-1.96	-1.42	-1.21	-1.49	1.05	-0.8	0.73	1.35	-0.79	2.15	-0.47	-0.64
DC126	0.57	0.15	0.38	-0.07	-0.25	-0.28	-0.09	0.04	0.35	-0.11	0.34	0.63	0.07	0.4	0.15	0.52	0.34	0.58	1.55	0.45	1.06	0.34	0.12	0.12	-0.96	-0.15	-1.15	-1	-0.33	0.21	-0.7	-0.75	-1.6	-1.67	0.14	0.38	-0.64	-0.38	-1.2	-1.11	0.53	0.4	-0.43	0.8	1.44	-0.88	-0.01	0.5	-0.61
DC127	-0.5	-0.98	-1.02	-1.03	-0.99	-0.82	-0.91	-0.08	-0.01	-0.21	0.13	0.17	-1.22	-0.37	-0.57	-0.41	-0.32	-0.36	-0.91	0.16	-0.15	-0.21	0.72	0.36	-0.93	-1.75	-1	-0.99	-0.74	-0.62	0.62	0.21	-0.01	-0.05	0.77	0.63	0.33	-0.44	0.49	-0.01	0.92	0.35	-0.61	-0.78	0.92	-0.89	0.66	0.06	0.68
DC128	-0.42	-1.01	-1	-1.01	-1.18	-1	-0.37	-0.36	-0.18	0.13	-0.15	0.06	-0.53	-1.03	-1	-0.44	-1.08	-0.75	-0.32	0.28	0.06	0.16	0.65	0.36	-0.98	-1	-1	-1	-0.49	-0.19	0.76	0.36	0.09	0.33	0.77	0.46	0.44	0.14	0.38	0.13	0.57	0.69	-0.7	0.06	0.98	-0.58	0.7	0.15	0.68
DC129	-0.55	-0.91	-0.95	-0.48	-0.89	-1.03	-0.75	-0.12	-0.06	-0.38	0.12	-0.11	-0.46	-0.53	-0.63	-0.64	-0.44	-0.64	-0.74	0.38	-0.15	-0.24	0.62	0.16	-0.96	-1.44	-1	-1	-0.59	-0.62	0.76	0.5	0.44	0.42	0.71	0.6	0.49	-0.2	0.32	0.24	0.9	0.23	-0.85	-0.3	0.87	-0.71	-0.99	-0.52	0.75
DC130	-0.28	-1	-1	-1	-1.02	-1	-1	-1	-0.88	-1	-0.99	-0.66	-1	-0.88	-1	-1	-1	-0.97	0.05	-0.84	-1	1.04	0.4	0.83	0.99	-0.46	-0.99	1	-0.8	-0.97	0.52	0.17	-0.57	1	-0.36	-0.86	0.84	-0.53	-1	1	0.33	-0.84	1.2	0.61	1.41	1.01	1.13	-0.53	0.5
DC131	-0.31	-1	-1.25	-1	-1	-1	-1.27	-1	-0.91	-1	-1	-0.74	-1	-0.9	-1	-1	-1	-0.99	-0.35	-0.94	-1	-0.07	0.41	0.18	-0.98	-1	-1	-1	-0.49	-0.19	0.32	-0.46	-1	-0.28	0.02	-0.06	0.22	-1	-0.93	-0.01	0.93	-0.19	-1	0.02	0.74	-1	0.7	0.09	0.23
DC132	1.5	0.14	0.01	0.51	0.08	0.33	0.21	-0.26	-0.35	0.46	0.55	0.53	0.35	-0.2	-0.45	0.14	0.13	-0.11	1	0.71	0.27	1.06	1.06	1.13	1	-0.36	1	1	0.43	-1	1.11	0.76	1.17	1	1.18	-0.27	1.04	-0.35	1.08	1	1.18	-0.9	1.6	0.58	1.53	0.97	1.03	0.82	1.03
DC133	-0.31	-1	-1.25	-1	-1	-1	-1.27	-1	-0.91	-1	-1	-0.74	-1	-0.9	-1	-1	-1	-0.99	-0.35	-0.94	-1	-0.07	0.41	0.18	-0.98	-1	-1	-1	-0.49	-0.19	0.32	-0.46	-1	-0.28	0.02	-0.06	0.22	-1	-0.93	-0.01	0.93	-0.19	-1	0.02	0.74	-1	0.7	0.09	0.23
DC134	-0.28	-1	-1	-1	-1.02	-1	-1	-1	-0.88	-1	-1	-0.66	-1	-0.92	-0.94	-1	-1	-0.98	0.05	-0.84	-1	1.04	0.4	0.83	0.99	-0.46	-0.99	1	-0.8	-0.97	0.52	0.17	-0.57	1	-0.36	-0.86	0.84	-0.53	-1	1	0.33	-0.84	1.2	0.61	1.41	1.01	1.13	-0.61	0.5
DC135	0.28	-0.53	-0.11	-0.78	0.1	-0.4	-1.27	-1.13	-1.84	-1.83	0.4	-0.3	-1.14	-0.5	-1.1	-1.51	0.3	-0.57	1.38	0.4	0.57	0.94	0.54	0.95	0.94	0.73	-1.01	1	1	-0.7	0.88	1.39	0.13	1	1	-0.75	0.85	0.85	-0.41	1	1	-1.31	0.95	1.43	1.81	0.95	0.99	-0.86	0.72
DC136	1.52	-0.58	0.19	0.93	-0.26	-0.38	0.96	-0.05	0.52	0.4	-0.1	0.12	1.88	0.23	0.54	0.42	-0.06	0.04	-0.04	-0.49	-0.12	0.73	0.44	0.64	-0.79	-1.28	-1	-0.99	-0.77	-0.67	-0.12	-0.45	-0.94	-1	0.1	0.39	0.02	-0.7	-0.69	-0.37	0.3	-0.2	0.42	-0.2	1.28	0.21	0.63	0.44	0.27
DC137	-0.42	-1.01	-1	-1.01	-1.18	-1	-0.37	-0.36	-0.18	0.13	-0.15	0.06	-0.53	-0.97	-0.99	-0.44	-1.08	-0.73	-0.32	0.28	0.06	0.16	0.65	0.36	-0.98	-1	-1	-1	-0.49	-0.19	0.76	0.36	0.09	0.33	0.77	0.46	0.44	0.14	0.38	0.13	0.57	0.69	-0.71	0.06	0.98	-0.58	0.7	0.15	0.68
DC138	-0.28	-1	-1	-1	-1.02	-1	-1	-1	-0.88	-1	-1	-0.66	-1	-0.95	-1	-1	-1	-0.98	0.05	-0.84	-1	1.04	0.4	0.83	0.99	-0.46	-0.99	1	-0.8	-0.97	0.52	0.17	-0.57	1	-0.36	-0.86	0.84	-0.53	-1	1	0.33	-0.84	1.2	0.61	1.41	1.01	1.13	-0.53	0.5
DC139	-0.06	-0.37	-0.48	0.56	-0.2	0.1	-1.68	-0.36	-0.48	-0.79	-0.21	0.07	-1.31	-0.06	-0.59	-0.43	-0.08	-0.26	1.61	0.33	0.33	1.03	0.71	0.88	1	0.38	-0.12	1	-0.38	-0.16	0.63	0.77	-0.03	1	-0.34	0.6	0.96	0.61	-0.37	1	0.53	0.29	1.14	1.36	1.42	1.02	0.9	0.27	0.9
DC140	-1.28	-1.46	-1.7	-1.83	-1.49	-1.5	-1.07	-1.12	-1.25	-0.87	-1.08	-1.11	-1.44	-1.35	-1.52	-1.39	-1.4	-1.4	-1.69	-1.05	-1.39	-0.18	-0.29	-0.3	-0.87	-1.74	-1	-1	-0.71	-1.03	0.15	-0.06	-0.78	-0.25	0.06	-0.93	0.08	-0.93	-0.79	-0.36	0.2	-1	-0.17	-1.7	1.12	-0.59	1.06	-1	-0.18
DC141	0.29	-0.34	-0.4	0.48	-0.49	-0.68	-0.69	-1.42	-1.09	-1.33	-1.25	-1.37	-1.44	-0.67	-1.24	-0.59	-0.51	-0.47	-0.33	-1.48	-0.88	-0.51	-1	-0.98	-0.9	-1.99	-1	-0.99	-1.03	-1.07	-0.88	-0.52	-1.14	-0.65	-1.04	-1.32	-0.93	-1.29	-1.18	-1.1	-1.09	-1.24	-0.13	-1.32	1.23	-0.7	0.09	-0.18	-0.85
DC142	0.83	-0.32	-0.45	0.3	-0.58	-0.28	0.32	-0.46	-0.23	0.57	-0.05	0.2	-0.32	-0.59	-0.62	0.45	-0.36	-0.06	0.51	0.09	0.27	0.48	0.65	0.65	-0.87	-0.42	-1	-1	-0.78	0.12	0.84	0.43	0.23	0.75	0.64	-0.26	0.71	-0.01	0.44	0.53	0.44	0.17	0.4	0.89	1.35	0.27	0.84	0.55	0.7
DC143	-0.17	0.07	-0.21	-0.08	-1	-0.9	-0.84	-0.56	-0.46	-0.54	-0.37	-0.32	-0.66	-0.39	-0.37	-0.71	-0.41	-0.53	1.69	0.18	0.13	1.04	0.41	0.81	1	0.6	1	1	-0.84	0.41	0.55	0.26	0.59	1	-0.21	-0.27	0.95	-0.25	0.12	1	0.42	-0.62	1.28	1.4	1.38	1.01	1.12	1.92	0.62
DC144	-0.28	-1	-1	-1	-1.02	-1	-1	-1	-0.88	-1	-1	-0.66	-1	-0.95	-0.94	-1	-1	-0.96	0.05	-0.84	-1	1.04	0.4	0.83	0.99	-0.46	-0.99	1	-0.8	-0.97	0.52	0.17	-0.57	1	-0.36	-0.86	0.84	-0.53	-1	1	0.33	-0.84	1.2	0.61	1.41	1.01	1.13	-0.61	0.5
DC145	0.47	-0.75	-0.76	-0.32	-1.19	-1.62	-1.77	-1.05	-1.38	-1.29	-1.31	-1.22	-1.39	-0.77	-1.29	-1.17	-1.19	-1.25	-0.3	-1.14	-1.11	-0.02	0.24	0.06	-0.98	-1	-1	-1	-0.49	-0.19	0.1	-0.77	-0.95	-0.5	-0.46	0.09	0.07	-1.07	-0.72	-0.2	0.73	-0.15	-0.97	0.14	0.73	-1	0.21	0.53	0.06
DC146	-1.21	-1.32	-1.73	-0.72	-1.47	-0.95	-0.67	-0.79	-0.89	-0.35	-0.7	-0.57	-0.71	-0.83	-1.22	-0.31	-0.92	-0.48	0.14	-0.56	-0.24	-0.18	0.16	-0.05	-0.87	-0.61	-1	-1	-0.9	0.14	0.38	0.01	-0.44	0.14	0.03	-0.32	0.12	-0.42	-0.11	-0.2	0.14	-0.03	-0.17	-0.18	1.12	-0.59	-0.52	0.32	0.22
DC147	-0.31	-1	-1.25	-1	-1	-1	-1.27	-1	-0.91	-1	-1	-0.74	-1	-0.95	-1	-1	-1	-0.99	-0.35	-0.94	-1	-0.07	0.41	0.18	-0.98	-1	-1	-1	-0.49	-0.19	0.32	-0.46	-1	-0.28	0.02	-0.06	0.22	-1	-0.93	-0.01	0.93	-0.19	-1	-0.63	0.74	-1	0.7	0.08	0.23
DC148	0.87	-0.84	-0.45	0.97	-0.64	-0.12	0.3	0.64	0.65	0.21	0.56	0.66	0.27	0.28	0.17	0.3	0.27	0.29	-0.01	0.69	0.45	-1.03	0.24	-0.74	-0.89	0.81	-1	-1	-0.95	0.83	0.6	0.29	0.67	0.68	0.06	0.5	0.44	1.01	0.74	0.3	0.09	0.9	-0.97	0.74	1.15	-0.92	1.75	-0.83	0.56
DC149	1.69	0.73	1.3	0.67	-0.31	-0.3	0.44	-0.34	-0.65	0.1	-0.4	-0.05	0.54	0.44	0.34	0.1	0.1	0.13	-0.04	-0.66	-0.08	-0.16	-0.91	-0.49	-0.96	-0.39	-1	-1	-0.95	-0.06	-0.24	0.22	-0.58	-0.26	-0.19	-1.15	-0.58	-0.19	-0.97	-0.85	-0.8	-0.59	-0.05	0.14	1.51	-0.25	1.2	0.27	-0.74
DC150	0.58	-0.2	0.05	-0.53	0.3	-0.31	-1.13	-1.05	-0.88	-1.41	-1	-0.9	-0.45	-0.67	0.05	-0.84	-0.83	-0.59	-0.15	-1.1	-0.75	-0.14	-0.34	-0.01	-0.83	-0.82	-1	-1	-0.88	-0.95	0.03	0.26	-0.27	0.39	-0.45	-1.14	0.26	-0.43	-0.05	0.09	-0.32	-1.38	0.01	-0.18	1.4	0.02	1.14	-0.75	-0.13
DC151	1.1	0.02	0.11	0.03	0.34	0.18	0.54	0.25	0.37	0.33	0.64	0.84	0.6	-0.48	0.03	-0.09	0.06	-0.01	1.11	0.94	0.75	0.28	0.41	0.58	0.95	0.61	1	1	1	-1.03	1.17	0.95	1.04	1	1	-0.94	0.99	-0.1	1.1	1	1	-1.28	0.55	0.89	0.52	0.99	1.88	-0.44	0.62
DC152	0.55	-0.84	-0.71	0.22	-0.86	-0.32	-1.1	-0.73	-1.51	-1.16	-0.98	-1.4	-0.52	-0.49	-1.15	-0.74	-0.8	-0.91	-0.07	-1.21	-1.18	-1.42	-1.32	-1.84	-1.13	-1.9	-1.01	-1	-0.95	-1.09	-2.44	-1.79	-1.46	-1.93	-1.17	-1.36	-2.1	-1.75	-0.57	-1.13	-0.7	-1.07	-1.58	-0.29	1.05	-1.64	1.75	-1.03	-2.21
DC153	-0.54	-1.06	-1.17	-1	-1	-1	0.16	-0.33	-0.23	0.32	-0.17	0.03	-1	-0.94	-0.96	-0.53	-0.76	-0.78	0.08	-0.1	-0.67	0.3	0.16	0.38	-0.87	-1	-1	-1	-0.71	-1.03	0.63	0.22	-0.04	0.47	0.52	-1	0.42	-0.72	-0.42	0.2	0.58	-1	0.33	-0.36	1.36	0.65	0.89	-0.83	0.21
DC154	-0.54	-1.06	-1.17	-1	-1	-1	0.16	-0.33	-0.23	0.32	-0.17	0.03	-1	-0.94	-0.96	-0.53	-0.76	-0.78	0.08	-0.1	-0.67	0.3	0.16	0.38	-0.87	-1	-1	-1	-0.71	-1.03	0.63	0.22	-0.04	0.47	0.52	-1	0.42	-0.72	-0.42	0.2	0.58	-1	0.33	-0.36	1.36	0.65	0.89	-0.83	0.21
DC155	0.39	-0.14	-0.11	0.71	-0.27	0.3	-0.49	-0.85	-0.49	-0.34	-0.47	-0.37	-0.38	-0.6	-0.37	-0.3	-0.41	-0.3	1.76	-0.58	-0.53	0.14	0.6	0.56	0.99	0.66	1	1	-0.87	0.56	0.7	0.2	-0.42	1	-0.38	-0.02	0.83	-0.42	-0.77	1	0.7	-0.26	0.41	1.19	1.41	0.66	1	0.73	0.73
DC156	-0.22	-0.71	-1.34	-1.16	-1.6	-2.1	-1.82	-2.33	-2.19	-1.47	-1.94	-1.85	-1.97	-1.76	-1.89	-1.85	-2.02	-2.02	-0.75	-1.6	-1.42	-0.29	0.2	-0.08	-0.97	-1.68	-1	-1	-0.81	-0.65	-0.06	-0.08	-1.25	-0.97	0.16	-0.19	-0.43	-1.01	0.78	-1.01	0.35	-0.17	-0.95	-0.51	0.9	-1.12	-0.69	0	0.01
DC157	-0.17	0.23	-0.21	-0.08	-1	-0.9	-0.84	-0.56	-0.46	-0.54	-0.37	-0.32	-0.66	-0.43	-0.35	-0.7	-0.41	-0.54	1.69	0.18	0.13	1.04	0.41	0.81	1	0.6	1	1	-0.84	0.41	0.55	0.26	0.59	1	-0.21	-0.27	0.95	-0.25	0.12	1	0.42	-0.62	1.28	0.8	1.38	1.02	1.12	1.74	0.62
DC158	-0.28	-0.6	-1	-1	-1.02	-1	-1	-1	-0.88	-1	-1	-0.66	-1	-0.88	-0.95	-1	-1	-0.98	0.05	-0.84	-1	1.04	0.4	0.83	0.99	-0.46	-0.99	1	-0.8	-0.97	0.52	0.17	-0.57	1	-0.36	-0.86	0.84	-0.53	-1	1	0.33	-0.84	1.2	0.61	1.41	1.01	1.13	-0.61	0.5
DC159	-0.47	-0.37	-0.81	-0.4	-0.73	-0.53	-0.23	-0.21	0.35	-0.01	0.16	0.35	0.22	-0.04	0.01	0.05	0.05	0.02	0.2	0.04	0.36	0.34	0.75	1	-0.95	-0.68	-1	-0.99	-0.74	0.24	0.27	0.17	-0.89	-0.88	0.96	1.08	0.35	-0.25	-0.6	-0.15	1.14	0.47	-0.31	-0.4	1.44	-1.05	-0.09	1.17	0.46
DC160	-0.03	-0.29	-1	-0.69	-0.06	-0.6	-0.43	-0.77	-0.93	-0.57	-0.1	-0.16	-0.01	-0.8	-0.97	-0.45	-0.13	-0.49	1.39	0.57	0.76	0.76	0.13	0.78	0.94	0.73	1	1	1.03	-0.96	0.99	1.15	1.23	1	1.21	0.21	1.04	0.28	1.07	1	1.03	-0.54	0.67	1.16	1.67	0.7	1.73	0.36	0.51
DC161	0.94	-0.03	-0.2	1.37	0.27	0.66	0.3	-0.6	0.09	0.27	-0.4	-0.2	0.37	-0.84	-0.32	0.56	-0.42	-0.17	1.13	-0.32	-0.16	0.87	-0.07	0.7	1	0.18	1	1	0.79	-1.09	0.67	0.77	1.11	1	0.3	-0.86	1.01	-0.23	1.15	1	0.48	-1.6	0.87	0.15	1.57	0.84	1.45	0.43	0.37
DC162	-0.21	-0.57	-1.07	-1.23	-1.22	-1.3	-1.32	-1.29	-1.08	-1.55	-1.46	-1.31	-1.25	-1.2	-1.24	-1.67	-1.59	-1.71	-0.29	-1.5	-1.67	-1.37	-4.28	-2.54	-1.03	-1	-1	-1.09	-1.12	-0.38	-4.37	-2.84	-1.37	-3.37	-1.65	-1.69	-3.5	-1.89	-1.36	-1.81	-2.46	-1.5	-1.55	0.93	1.31	-1.29	2.33	-1.19	-3.12
DC163	-0.09	-0.7	-1	-1.03	-1.02	-1.02	-1.12	-0.94	-1.03	-1.36	-1.23	-0.99	-1.16	-1.03	-1.13	-1.33	-1.27	-1.35	-0.18	-1.25	-1.23	-1.43	-4.4	-1.17	-0.99	-1	-1	-1.06	-1.23	-1.56	-4.57	-2.63	-1.57	-3.08	-1.72	-1.64	-3.59	-1.71	-1.53	-1.8	-2.7	-2	-1.62	1.03	1.31	-1.29	2.34	-1.25	-2.15
DC164	0.21	-0.36	-0.76	-0.65	-0.9	-0.8	-1.23	-1.37	-0.98	-1.39	-1.23	-1.06	-1.33	-1.22	-1.21	-1.76	-1.42	-1.66	0	-1.43	-1.4	-1.77	-4.02	-3.16	-0.92	-1.61	-0.92	-1.21	-1.5	-1.24	-4.31	-2.79	-1.18	-3.52	-1.71	-1.84	-3.43	-1.65	-0.94	-2.09	-2.52	-2.07	-1.81	0.21	0.91	-1.59	2.04	-1.52	-2.95
DC165	-0.12	-0.62	-1	-1	-1	-1	-1	-1.65	-1.17	-1.51	-1.79	-1.5	-1.05	-1.17	-1.12	-1.39	-1.49	-1.49	-0.18	-1.57	-1.49	-1.43	-4.78	-2.21	-0.99	-1	-1	-1.06	-1.23	-1.56	-4.47	-2.71	-1.7	-2.98	-1.69	-1.38	-3.56	-1.91	-1.62	-1.66	-2.58	-1.88	-1.62	1.03	1.31	-1.29	2.34	-1.25	-2.69
DC166	-0.12	-0.62	-1	-1	-1	-1	-1	-1.65	-1.17	-1.51	-1.79	-1.5	-1.05	-1.17	-1.12	-1.39	-1.49	-1.49	-0.18	-1.57	-1.49	-1.43	-4.78	-2.21	-0.99	-1	-1	-1.06	-1.23	-1.56	-4.47	-2.71	-1.7	-2.98	-1.69	-1.38	-3.56	-1.91	-1.62	-1.66	-2.58	-1.88	-1.62	1.03	1.31	-1.29	2.34	-1.25	-2.69
DC167	-0.11	-0.74	-0.94	-0.92	-0.97	-0.98	-1.21	-1.18	-1.15	-1.52	-1.49	-1.25	-0.48	-0.55	-0.38	-0.61	-0.64	-0.61	-0.18	-1.41	-1.03	-1.43	-4.75	-1.01	-0.99	-1	-1	-1.06	-1.23	-1.56	-4.52	-2.68	-1.61	-3.03	-1.66	-1.62	-3.56	-1.95	-1.59	-1.45	-2.6	-1.38	-1.62	1.03	1.31	-1.29	2.34	-1.25	-2.33
DC168	0.52	0.22	0.21	0.2	0.07	0.22	-0.5	-0.54	-0.3	-0.24	-0.34	0.28	-0.36	-0.39	-0.3	-0.27	-0.21	-0.12	1.27	-0.73	-0.51	-1.76	-3.6	-2.04	-1.28	-0.98	-1.09	-0.28	-1.99	-1.17	-4.3	-2.43	-0.93	-3.52	-1.97	-2.85	-3.27	-1.17	-1.17	-2.08	-2.47	-2.34	-2.03	0.37	0.95	-0.61	1.96	-1.02	-1.4
DC169	0.52	0.99	0.5	0.67	1.01	0.98	-0.91	0.44	0.38	0.44	0.74	1.13	-1	0.33	-0.07	0.38	0.71	0.76	1.77	0.87	0.96	1	1.18	1.02	1.1	0.62	1	1	1	-0.98	1.1	1.26	0.83	1	1	0.69	1	0.36	1	1	1	0.17	1.11	1.59	1.06	1.05	1.01	0.87	1.26
DC170	1.41	1.36	0.97	0.95	0.99	0.99	0.91	0.88	0.87	0.83	0.89	1.1	0.84	0.98	0.91	0.83	1	0.96	1.29	0.81	0.96	0.88	2.21	1.82	1.07	0.92	-0.69	1	1	1	1	0.95	-0.3	1	1	-0.34	0.91	0.28	-0.69	1	1	0.6	1.36	1.05	1.4	0.67	1.23	0.74	1.04
DC171	0.52	0.99	0.5	0.67	1.01	0.98	-0.91	0.44	0.38	0.44	0.74	1.13	-1	0.33	-0.07	0.38	0.71	0.76	1.77	0.87	0.96	1	1.18	1.02	1.1	0.62	1	1	1	-0.98	1.1	1.26	0.83	1	1	0.69	1	0.36	1	1	1	0.17	1.11	1.59	1.06	1.05	1.01	0.87	1.26
DC172	1.19	0.99	0.37	0.65	0.56	0.64	-0.01	-0.19	-0.06	0.03	-0.09	0.62	0.37	0.12	0.26	0.22	-0.06	0.37	1.78	-0.35	-0.49	1.03	0.95	0.81	0.55	-0.92	-1	1	-0.09	1	-0.18	-1.45	-1	1	-0.99	-0.34	-0.03	-1.1	-1	1	-0.19	0.6	0.62	0.8	2.02	1.06	0.62	1	0.47
DC173	1.28	2.09	1.26	1.14	1.88	1.46	0.67	2.14	2.03	1.34	2.1	2.24	0.1	2.52	2.17	0.62	2.23	2.02	1.95	1.46	1.14	0.75	-0.09	0.48	0.87	-1.04	1	1	-0.94	-0.99	-0.67	-1.44	0.98	1	-1.31	-0.86	0.34	-1.19	1.3	1	-0.97	-1.91	0.5	-0.1	1.18	0.73	0.14	0.61	-0.15
DC174	0.72	1.67	0.27	1.52	0.98	0.91	0.27	0.88	0.18	0.37	0.97	0.9	0.85	0.93	-0.05	1.17	0.96	0.83	2.4	1.31	1.34	0.34	0.75	0.38	1	1	1	1	-0.71	0.91	1.03	1.06	1	1	1	1.13	1.01	2.11	1.43	1	0.6	1.03	0.97	1.29	1.41	1.02	0.9	1.79	0.94
DC175	0.32	-0.4	-0.81	0.45	-0.43	-0.54	-1.92	-0.35	-1.17	-1.36	-0.19	-0.63	-1.21	-0.92	-1.96	-1.39	-0.61	-1.53	-0.7	-0.13	-1.01	-1.35	0.21	-0.69	-1.18	-0.87	-1	-0.99	-0.95	0.07	0.2	0.17	-0.25	-0.3	0.25	0.51	-0.55	-0.08	-0.21	-1.04	0.14	0.72	-1.42	-0.98	1.05	-1.55	1.69	-1.39	0.25
DC176	0.39	0.81	0.34	-0.06	-0.24	-0.15	-1.49	-1.77	-1.34	-1.99	-1.88	-2.1	-1.45	-1.7	-1.75	-1.72	-1.98	-1.89	1.07	-1.73	-1.77	-1.51	-1.3	-2.37	-0.91	-0.74	-1	-0.99	-1.08	-0.3	-2.33	-2.22	-1.89	-2.44	-0.68	-0.32	-2.03	-1.85	-1.53	-1.3	-0.91	-0.19	-1.33	0.65	1.11	0.03	1.95	-1.27	-2.09
DC177	0.7	0.72	0.17	1.41	-1.07	0.03	0.64	0.5	0.84	0.98	0.64	1.1	0.65	0.69	0.82	1.37	0.43	0.99	1.39	0.86	1.52	1.33	0.7	1.33	-0.82	0.53	-1	-1	-0.95	0.65	0.81	0.69	0.09	0.51	0.83	0.02	0.37	0.97	0.7	0.11	0.29	0.66	1.48	1.34	2.05	1.43	1.27	1.32	0.65
DC178	1.23	-0.89	-0.74	0.01	-1.34	-0.78	0.31	-2.24	-1.01	-0.27	-1.39	-0.72	-0.16	-2.11	-1.34	-0.49	-1.64	-0.98	0.34	-0.87	-0.91	0	-0.04	0.05	-0.88	-1.63	-1	-1	-0.79	-0.92	-1.58	-1.19	-2.11	-1.54	-1.12	-0.11	-1.2	-1.23	-1.8	-1.18	-0.6	-0.58	-0.66	-0.26	-0.61	-0.98	0.89	-0.29	-0.85
DC179	0.5	0.22	-0.53	0.9	-0.15	0.27	-0.79	-1.36	-1.27	-0.73	-1.15	-0.73	-0.06	-0.59	-0.95	0.27	-0.6	-0.06	0.25	-1.23	-0.69	-0.8	-1.03	-1.1	-1.24	-1.68	-0.6	-0.71	-0.97	-1.07	-2.02	-1.81	-0.64	-0.74	-1.25	-1.55	-1.27	-1.67	-0.49	-0.39	-0.75	-1.42	-1.48	-1.35	1.05	0.31	1.11	-0.88	-1.81
DC180	1.84	1.08	0.32	0.96	0.51	0.97	1.49	1.73	1.8	1.16	1.7	1.57	1.52	1.59	1.5	1.67	1.55	1.64	2.19	2.05	1.85	1.01	1.25	1.13	1	1	1	1	-0.71	1.02	1.12	0.97	1.12	1	1.07	1.7	1.03	2.19	1.46	1	0.89	1.31	1.18	2.13	1.94	1.02	0.82	1.28	1.23
DC181	1.14	1.2	0.73	0.7	0.87	0.89	0.91	0.95	0.95	0.89	0.95	1.1	0.85	0.92	0.89	0.87	0.95	0.91	1.76	0.9	0.9	1	1.88	1.51	1.07	0.92	-0.69	1	1	1	1	0.95	-0.3	1	1	-0.34	0.91	0.28	-0.69	1	1	0.6	0.78	1.45	0.59	0.92	1	0.36	1.02
DC182	0.1	-0.62	-0.86	-0.91	0.08	-0.79	-0.79	-0.68	-0.3	-0.6	-0.56	-0.06	-0.72	-0.39	-0.22	-0.73	0.02	0	0.43	-0.96	0.19	0.93	0.49	0.7	0.96	-1	1	1	-0.97	-1	-0.09	-1.14	-0.76	1	-1.18	-1.02	0.4	-1.11	0.44	1	-0.93	-0.94	0.9	0.34	1.64	0.94	0.94	0.61	0.23
DC183	0.22	-0.69	-1.09	-0.58	-1.02	-0.62	-1.15	-0.68	-1.24	-1.16	-0.81	-0.91	-1.57	-0.75	-1.51	-1.13	-1.08	-1.31	-0.6	-0.77	-0.9	-0.44	-0.89	-1.05	-1.24	-1.89	-1	-1	-0.97	-1.02	-1.77	-1.75	-0.3	-1.28	-1.15	-1.01	-1.44	-1.71	0.19	-1.08	-0.87	-0.96	-0.92	-0.99	0.94	-0.82	-0.48	-0.43	-1.6
DC184	0.81	-0.06	-0.47	0.12	0.26	0.14	0.23	-0.78	-0.15	0.16	-0.15	0.33	-0.19	-0.86	-0.4	0.05	-0.23	-0.02	1.19	-0.13	0.39	0.4	0.53	0.54	0.98	-0.49	1	1	-0.97	-0.7	0.32	-0.43	0.07	1	-0.79	-0.25	0.66	-0.46	0.78	1	-0.79	-0.39	1.06	0.68	1.5	1.02	0.48	0.03	0.54
DC185	0.36	0.16	0.17	0.34	-0.87	-0.26	-1.5	-0.84	-0.37	-0.92	-0.6	-0.73	-1.42	-0.69	-0.19	-1.59	-1.1	-1.1	0.63	-0.56	-0.75	-0.36	0.21	-0.4	-1.16	-0.12	-1	-0.99	-0.97	0.29	-0.03	-1.03	-0.61	-0.95	0.14	0.34	-0.53	-1.43	-0.51	-0.72	-0.37	0.56	-0.44	0.9	0.96	-0.3	0.76	0.27	-0.05
DC186	1.62	0.67	0.9	1.26	0.83	0.96	-0.33	-0.34	-0.58	-0.3	-0.26	-0.32	0.16	-0.57	-1.29	0.47	-0.06	-0.21	1.75	0.17	0.4	-0.03	0.37	-0.2	-0.97	0.47	-1	-0.98	-1.02	0.94	0.35	-0.05	-0.13	0.12	-0.17	0.64	-0.43	-0.37	-0.47	-0.71	-0.65	1.06	0.27	1.69	1.32	1.34	1.94	-0.38	0.37
DC187	0.48	0.45	0.03	-0.41	-0.46	-0.69	-1.14	-1.41	-1.61	-1.13	-1.23	-1.24	-0.99	-1.21	-1.72	-1.22	-1.41	-1.27	0.83	-0.82	-0.69	-0.66	-0.73	-1.77	-1.23	-1	-1	-1.05	-1.04	0.41	-0.44	-0.28	-0.82	-0.88	-0.22	-0.12	-1.65	-1	-1.21	-1.26	-1.22	0.37	-0.78	0.61	1.36	-0.69	2.35	-0.78	-0.7
DC188	-0.04	1.99	1.16	0.46	0.44	0.43	-0.36	-0.67	-0.47	0.08	-0.77	-0.58	-0.28	-0.51	-0.51	0.46	-0.7	-0.59	1.44	-0.55	0.45	0.32	0.29	0.33	1.01	0.39	1	1	0.2	-0.47	0.42	0.8	-0.39	1	-0.74	-0.07	0.88	0.8	0.31	1	-0.18	0.09	0.79	0.5	1.74	0.94	0.28	0.63	0.63
DC189	-0.46	-0.48	-1.11	-1.28	-1.06	-0.99	-3.09	-3.03	-3.11	-3.09	-2.57	-3.09	-1.62	-1.91	-1.64	-1.71	-1.7	-1.61	0.18	-2.29	-1.94	-1.4	-0.88	-1.94	-1.5	-1	-1	-1.03	-1	1.05	-1.68	-2.41	-1.61	-2.27	-0.68	0.81	-1.68	-2.08	-1.31	-1.21	-1.53	1.3	-1.59	0.87	1.06	-1.5	2	-1.13	-1.69
DC190	-0.37	-0.45	-1.22	-0.72	-1.21	-1.11	0.28	-0.15	-0.34	0.06	-0.01	-0.01	0.02	-0.01	-0.51	-0.18	-0.6	-0.52	0.12	0.44	-0.73	-1.43	-0.11	-0.98	-1.41	-1	-1	-1.02	-1	1.04	-0.39	-0.94	-0.04	-0.49	-1.14	1.02	-0.95	-0.74	-0.38	-1.05	-0.91	1.31	-1.49	0.81	1.1	-1.53	2	-1.14	-0.14
DC191	1.51	-0.51	-0.49	0.89	-0.69	-0.38	-1.19	-1.47	-0.8	-1.13	-1.07	-1.05	-1.06	-1.02	-1.16	-0.95	-0.82	-0.78	-0.27	-1.59	-1.28	0.83	0.07	0.43	-1.35	-2.12	-1	-1	-0.92	-0.97	-2.69	-2.54	-2.22	-1.94	-1.27	-0.1	-2.04	-2.11	-1.7	-1.17	-0.69	-0.7	-0.4	-0.29	1.07	-0.5	0.59	0.49	-1.62
DC192	0.15	-0.66	-1.2	-0.95	-1.09	-1	-1.33	-2.8	-1.82	-1.86	-2.4	-2.25	-0.89	-1.35	-1.22	-1.07	-1.38	-1.22	0.35	-2.02	-1.47	-0.95	-1.82	-1.75	-1.5	-1	-1	-1.03	-1	1.05	-2.19	-2.07	-0.99	-1.85	-0.3	1.22	-2.05	-1.73	-1.48	-1.16	-1.95	1.42	-1.33	0.99	1.13	-1.21	2.09	-0.98	-2.63
DC193	0.38	-0.41	-0.69	-0.08	-0.79	-0.3	-0.09	-1.64	-0.28	-0.33	-1.47	-0.49	-0.09	-1.39	-0.66	-0.03	-1.66	-0.64	-0.19	-0.75	-0.68	-1.09	-0.84	-0.96	-0.98	-0.99	-1	-1	-1	-0.83	-1.44	-0.68	-1.42	-1.1	-1.22	-0.78	-0.8	-0.59	-0.61	-1.05	-0.88	-0.74	-1.17	-0.33	0.27	-0.97	-1.11	-0.42	-1
DC194	0.87	-0.13	-0.35	1.46	-0.23	0.03	-0.51	-0.95	-0.91	-1.19	-1.35	-1.09	0.01	-0.78	-0.62	-0.86	-0.96	-0.91	0.11	-1.36	-1.11	-0.67	-0.16	-0.45	-1.08	-1.05	-1	-0.98	-0.97	-0.13	-0.87	-1.65	-1.59	-1.28	-0.92	-0.6	-1.09	-1.9	-1.28	-1.11	-0.51	-0.16	-1.03	0.55	0.72	-0.91	-0.6	1.05	-0.81
DC195	-0.86	-0.31	-1.16	-1.15	-0.96	-1.27	-1.25	-2.32	-1.4	-1.44	-2.14	-1.62	-1.62	-1.59	-1.51	-1.47	-2.01	-1.77	-0.64	-1.6	-1.48	-1.23	-1.87	-1.83	-1.07	-1.35	-1	-1	-0.98	-0.79	-2.45	-1.26	-1.96	-2.14	-1.23	-1.04	-1.66	-1.24	-1.58	-1.32	-0.94	-0.99	-1.31	-0.66	0.65	-1.28	-1.26	-1.03	-1.94
DC196	0.49	-0.35	-0.28	-0.35	-0.67	-0.43	-0.73	-1.63	-1.17	-1.02	-1.28	-0.76	-0.77	-2.19	-1.37	-1.22	-2.26	-1.66	0.4	-0.98	-2.1	-1.04	-3.59	-1.86	-1.51	-1	-1	-1.05	-1	0.99	-2.51	-1.89	-1	-2.01	-0.72	0.57	-1.78	-2.2	-0.86	-1.35	-1.56	0.9	-1.27	1	1.18	-1.1	2.11	-1	-3.04
DC197	-0.62	-0.86	-2.07	-1.76	-1.34	-2.16	-1.68	-1.6	-1.59	-1.74	-1.59	-1.87	-1.83	-1.12	-1.73	-1.34	-1.04	-1.27	-1.24	-1.77	-1.31	-1.3	-0.84	-1.53	-1.23	-1.6	-1	-0.99	-0.89	-0.94	-1.95	-2.48	-1.94	-1.97	-0.54	-0.64	-1.85	-1.35	-1.74	-0.99	-0.13	-0.6	-1.87	-0.59	0.42	-1.6	0.56	-1.41	-1.87
DC198	0.36	2.36	1.2	0.22	1.22	0.34	1.22	-0.5	0.1	0.69	-0.35	0.09	0.48	0.56	0.56	0.48	-0.07	0	0.35	-0.41	-0.03	-0.1	-0.16	-0.22	-1.2	-0.82	-1	-1	-0.91	-0.04	-0.97	-0.42	-0.77	-1.37	-0.29	0.24	-0.93	-0.49	-0.84	-1.15	-0.18	0.36	-0.73	-0.28	0.92	-0.78	-0.27	0.24	-0.6
DC199	-0.18	-0.99	-0.74	0.47	-0.84	-0.64	0	-1.08	-0.73	-0.41	-0.64	-0.54	-1.29	-1.05	-1.22	-0.75	-0.86	-1.07	0.56	-0.77	-0.72	0.43	0.46	0.45	-0.88	-0.68	-1	-1	-0.92	-0.22	0.26	-0.15	-0.93	-0.03	-0.02	-0.51	-0.11	-0.8	-0.82	-0.48	0.4	-0.16	0.1	0.42	1.15	-0.08	0.95	0.37	0.2
DC200	-0.03	-0.45	-0.94	-0.79	-1.28	-1.17	-0.34	-0.14	0.29	-0.04	0.15	0.21	-0.9	0.06	-0.24	0.18	-0.01	0.1	0.16	0.63	0.65	-1.54	0.33	-0.14	-1.5	-1	-1	-1.05	-1	0.87	0.31	0.57	0.3	0.02	0.35	1.01	-0.24	0.67	0.08	-0.31	0.26	1.03	-1.41	0.8	1.15	-1.47	2.01	-1.11	0.44
DC201	0.05	0.6	0.05	1.12	0.36	0.4	-0.51	-1.53	-0.84	-0.07	-1.3	-0.89	-0.24	-0.92	-0.65	0.18	-0.87	-0.77	1.79	-0.67	-0.07	0.12	-0.05	0.08	1.01	0.39	-1.56	1	0.2	-0.73	0.11	0.66	-0.91	1	-1	-0.36	0.77	0.37	-1.11	1	-0.17	-0.42	0.51	0.47	1.38	0.79	0.15	-0.49	0.24
DC202	0.9	0.58	1.15	1.07	0.06	0.5	0.45	0	0.64	1.54	0.48	1.25	-0.28	-0.74	-0.07	0.67	-0.55	0	1.62	1.49	0.68	0.83	0.28	0.59	1	0.63	1	1	0.91	-0.47	0.17	0.88	1	1	-0.87	0.33	0.92	0.71	0.84	1	0.02	0.1	0.79	1.3	1.47	0.83	0.99	0.65	0.68
DC203	-0.16	-0.47	-0.93	-1.04	-1.19	-1.01	-0.91	-2.29	-1.74	-0.71	-1.95	-1.57	-2.32	-2.12	-1.84	-1.62	-2.08	-1.57	0.18	-1.11	-1.89	-1.26	-0.33	-2.18	-1.41	-1	-1	-1.02	-1	0.97	-0.44	-1.3	-1	-1.26	-0.38	0.58	-1.63	-1.96	-1.44	-1.21	-0.91	1.25	-1.19	0.86	1.29	-1.21	2.1	-1.04	-0.61
DC204	1.36	0.68	0.19	0.29	-0.12	-0.17	0.89	-0.11	0.26	0.53	-0.24	0.05	1.22	-0.08	0.23	0.3	-0.63	-0.35	1.21	0.06	-0.47	1	1.19	1.08	0.94	-0.75	1	1	-0.01	-1	0.92	0.18	-0.2	1	0.75	-0.85	0.77	-0.73	-0.38	1	0.98	-0.69	0.87	0.28	1.76	1.02	1.08	0.97	0.96
DC205	0.29	-0.88	-1.22	-0.45	-1.74	-1.3	-0.11	-1.61	-1.15	-0.47	-1.52	-1.15	0.42	-1.17	-0.76	-0.39	-1.64	-1.14	0.02	-1	-0.17	-0.14	0.25	0.21	-0.92	-0.45	-1	-1	-0.32	0.12	-0.03	0.1	-1.24	-0.78	0.04	0.22	-0.28	-0.05	-0.81	-0.78	-0.01	0.51	-0.35	-0.28	1.01	-0.7	0.88	0.91	0.02
DC206	0.61	-0.34	-0.61	0.02	-0.95	-0.7	1.1	0.41	1.02	1.21	0.65	1.09	0.79	0.24	0.44	0.79	0.14	0.48	0.41	1.2	1.24	0.52	0.96	0.97	-0.93	-0.51	-1	-1	-0.68	0.35	0.96	0.95	0.85	0.73	1.06	0.99	0.64	1.25	0.62	0.47	0.92	1.13	-0.11	0.58	1.08	-0.44	0.16	0.73	1.02
DC207	0.78	0.69	0.04	1.47	0.08	0.28	1.36	1.15	1.36	1.25	0.95	1.1	1.3	1.1	0.88	1.37	0.95	0.89	2.21	1.38	1.45	1.03	1.02	1.12	1.01	1	1	1	-0.64	0.98	1.07	1.11	1.03	1	1.08	0.97	1.04	1.19	0.91	1	0.92	1.07	1.21	1.91	1.17	1.02	1.02	1.32	1.1
DC208	0.33	-0.91	-0.62	-0.28	-1.54	-0.91	-1.48	-1.87	-1.74	-1.37	-1.89	-1.48	-0.21	-1.31	-1.09	-0.4	-1.61	-0.96	0.08	-1.44	-1.22	-0.52	-0.29	-0.21	-0.92	-0.31	-1	-1	-0.13	0.12	-0.84	-0.52	-1.31	-1.32	-0.95	-0.4	-0.29	-0.89	-0.81	-0.61	0.03	-0.54	-0.81	-0.45	0.86	-1.23	-0.69	0.2	-0.78
DC209	0.69	-0.43	-0.66	0.23	-0.63	-0.72	-0.2	-1.46	-0.64	-0.97	-1.04	-0.72	0.28	-0.87	-0.58	-0.59	-1.2	-0.78	0.39	-0.64	-0.56	0.34	-0.08	0.22	-0.9	-0.2	-1	-1	-0.34	-0.03	0.2	0.3	-0.35	0.06	-0.08	-0.31	0.44	-0.31	0.96	0.22	0.46	-0.7	0.11	0.58	1.17	-0.16	1.09	1.03	0.08
DC210	0.67	0	-0.52	0.02	0.35	0.12	0.5	0.25	0.06	-0.11	-0.15	-0.03	1.85	1.38	1.65	1.04	0.9	1.11	1.51	-0.7	0.33	0.41	-0.43	0.36	-0.68	0.42	-1	-0.99	-1.1	0.93	-1.03	-1.22	-1.46	-1	-1.08	-0.09	-0.55	-1.3	-1.16	-0.01	-0.47	-0.17	0.13	1.05	1.9	0.67	0.68	2.05	-1.14
DC211	0.37	-0.29	-0.25	-1.16	-0.26	-1	-0.3	-0.03	-0.24	0.01	-0.1	0.18	-0.69	0.49	0.07	0.37	0.05	0.28	-0.14	-0.48	0.21	0.02	-0.5	0.08	-0.88	0.31	-1	-1	-0.46	-0.57	0.29	0.91	0.21	0.58	0.3	-1.06	0.35	0.73	0.28	0.29	-0.42	-0.7	-0.2	0.37	1.7	-0.09	-0.73	-0.02	-0.07
DC212	-0.97	-0.86	-1.31	-0.99	-1.12	-0.37	-0.97	-1.03	-0.33	-0.37	-0.47	-0.02	-0.75	-0.44	-0.06	0.18	-0.12	0.58	-0.95	-0.52	0.25	-0.95	-0.77	-0.79	-0.89	-0.23	-1	-1	-0.55	-1	0.21	0.87	0.43	0.66	-0.02	-0.69	0.32	0.76	0.51	0.36	-0.52	-0.45	-1.5	-0.49	1.37	-1.14	1.32	0.28	-0.21
DC213	0.85	-0.89	-0.37	0.81	-0.77	0.32	-0.58	-0.72	-0.43	-0.16	-0.08	0.05	0.13	-0.49	-0.39	0.55	-0.13	0.43	0.87	-0.49	0.7	-1.06	-0.91	-0.89	-0.79	0.41	-1	-0.99	-1.04	-0.65	-0.17	0.49	0.29	0.54	-0.49	-0.89	-0.06	0.62	0.52	0.08	-1.24	-0.37	-0.92	0.77	1.36	-0.87	-0.56	-0.35	-0.4
DC214	1.6	0.59	0.9	1.27	0.16	0.81	-0.19	-0.14	-0.2	-0.28	-0.3	-0.12	0.12	0.03	0.53	0.59	0.24	0.74	1.37	-0.5	0.63	-0.15	-0.58	-0.06	-1.13	0.34	-1	-0.99	-1	-0.47	-0.24	0.04	-0.13	-0.01	-0.44	-0.66	-0.77	-0.32	-0.54	-0.89	-1.13	-0.12	0.24	1.3	1.63	0.44	0.49	0.96	-0.48
DC215	-0.25	0.37	-0.27	-0.44	0.05	-0.11	-0.78	0.16	-0.54	-0.18	0.5	0.13	-0.47	-0.02	-0.4	-0.41	0.4	-0.28	1.06	0.14	-0.09	-0.04	-0.75	-0.46	0.97	-0.48	1	1	-0.97	-0.7	0.16	-0.48	0.55	1	-0.62	-0.8	0.63	-0.86	0.2	1	-0.19	-0.87	0.35	-0.34	1.36	0.61	-0.03	0.39	-0.29
DC216	0.4	-0.33	-0.65	-0.64	-0.41	-1	-0.04	-0.17	0.16	-0.28	-0.31	-0.18	0.73	-0.06	-0.14	0.06	-0.22	-0.07	0.06	-0.33	-0.07	0.05	0.24	0.18	-0.94	-0.59	-1	-1	-0.36	-0.1	-0.08	0.2	-0.88	-0.8	-0.21	0.89	-0.21	0.23	-0.6	-0.78	0.2	0.62	-0.52	0.09	1.13	-0.57	-0.23	0.32	0.08
RP0001	1.05	2.67	2.35	1.92	3.66	3.55	0.88	2.03	1.94	1	1.45	1.34	-0.82	2.29	1.45	-0.32	1.61	0.89	0.55	0.68	-0.17	0.09	0.12	0.21	-1.01	0.48	-1.01	-0.99	0.23	0.52	0.7	0.32	-0.96	0.1	0.95	-0.22	0.34	-0.11	-1.06	-0.03	0.85	0.27	-0.71	0.52	-0.45	-1.11	-0.13	1.14	0.83
RP0002	2.86	3.12	1.99	1.33	1.93	1.11	1.45	2.27	1.58	1.88	1.64	1.79	1.83	2.87	2.07	2.16	2.05	2	1.76	1.15	1.72	0.91	0.56	0.81	0.99	1.11	1	1	-0.99	0.97	0.56	0.64	0.72	1	-0.06	0.63	0.72	1.32	0.92	1	-0.42	0.93	0.97	1.84	1.5	0.91	1.14	1.23	0.81
RP0003	0.92	1.56	0.17	-0.19	1.12	0.66	0.29	1.49	1.2	0.43	1.25	0.97	0.25	1.6	0.81	0.3	1.14	0.8	2.19	1.37	1.38	0.97	0.78	0.8	1.01	1	1	1	-0.68	1	1.03	0.73	0.82	1	0.85	0.84	1.02	0.81	1.12	1	0.85	1.01	1.04	1.96	1.29	1	1.01	1.22	1.14
RP0004	0.53	0.14	0.4	1.04	0	0.58	0.52	0.75	0.7	1.28	0.86	1.54	0.28	0.62	0.59	1.42	0.71	1.23	0.59	0.75	0.58	0.99	1.07	1	0.98	1.07	-0.81	1	1	-0.71	0.98	1.35	1	1	1	1.2	0.92	1.72	0.33	1	1	0.67	1.4	2.02	0.74	1.03	2.12	-0.47	1.12
RP0005	0.89	-1.14	-0.3	0.38	-1.67	-0.53	0.65	-1.05	-0.41	0.33	-1.09	-0.02	0.22	-1.61	-0.89	0.25	-1.6	-1.24	-0.87	-0.91	-1.67	-2.22	-3.6	-3.17	-0.91	0.06	-1.06	-1	-1.71	-0.82	-2.7	-0.02	-0.9	-1.04	-0.61	-1.31	-1.65	0.44	0.26	-1.06	-0.68	-1.22	-2.3	-0.01	-1.35	-1.59	-2.92	-0.45	-2.72
RP0006	2.56	0.71	1.05	2.41	1	1.74	0.94	0.73	1.08	0.8	0.6	0.73	0.58	0.34	0.96	1.03	0.77	0.85	1.13	0.62	0.9	-0.13	0.39	0.1	-0.93	0.16	-1	-0.99	-0.99	0.64	0.81	0.62	0.76	0.71	0.59	0.68	0.5	0.97	0.81	0.43	-0.15	0.71	0	1.12	1.26	-0.45	1.06	1.03	0.64
RP0007	2.6	2.52	1.87	2.35	2.06	2.25	2.62	1.79	1.94	2.59	1.91	2.24	2.64	1.69	1.68	2.05	1.56	1.66	2.29	2.37	1.55	0.94	1.22	0.95	1.02	1.73	1	1	1	1.05	1.17	1.25	1.21	1	1	1.61	1.02	1.43	1.13	1	1	1.62	0.95	2.35	1.08	0.97	1.91	1.02	1.45
RP0008	1.75	-0.05	0.27	0.49	-0.61	-0.67	1.11	0.42	0.3	1.3	0.57	0.82	0.26	-0.31	-0.75	0.33	-0.27	-0.3	1.03	0.56	-0.01	1.13	0.39	0.86	-0.91	0.43	-1	-1	-0.64	0.91	0.6	0.29	-0.63	0.33	0.58	-0.31	0.26	-0.04	0.85	-0.11	0.28	0.34	0.91	1.24	1.63	0.37	1.2	1.28	0.66
RP0009	0.27	-0.26	-0.54	-0.45	-0.65	-0.57	0.76	0.51	0.71	0.73	0.58	0.94	0.55	0.66	0.67	0.63	0.56	0.71	0.07	0.41	0.16	0.91	1.6	1.43	0.68	-0.14	-0.84	1	1	-1	0.95	0.6	-0.65	1	1	-1	0.77	-0.45	-1	1	1	-1	0.11	0.53	-0.75	0.86	0.97	-0.77	0.87
RP0010	2.35	1.52	0.89	1.03	0.78	1.06	1.24	-0.11	0.46	0.65	-0.26	0.29	1.57	0.37	0.75	0.74	-0.07	0.46	1.6	-0.16	0.05	0.44	0.68	0.63	0.97	0.5	1	1	-1	0.14	0.6	-0.49	-0.25	1	-0.36	-0.28	0.53	-0.73	-0.02	1	-0.06	0.1	0.91	1.59	1.32	1	1.17	0.58	0.7
RP0011	2.82	1.61	1.1	1.66	2.53	1.88	1.95	0.93	1.21	1.46	1.07	1.15	2.3	1.42	1.39	1.59	1.72	1.44	1.74	1.43	1.55	0.77	0.64	0.86	0.94	1.21	1	1	-1.02	0.88	0.73	0.47	0.79	1	0.09	1.27	0.71	0.68	1.2	1	-0.09	1.16	0.72	1.74	1.69	0.73	1.41	1.14	0.71
RP0012	3.17	2.86	2.72	2.57	2.16	2.36	2.71	2.36	2.04	2.47	1.97	2.33	3.26	2.49	2.4	2.78	2.02	2.2	2.3	1.99	1.69	0.91	1.55	1.16	1.02	1.73	1	1	1	1.05	1.17	1.3	1	1	1	1.8	1.02	1.23	0.87	1	1	1.57	0.92	2.38	1.09	0.93	0.99	0.95	1.27
RP0013	2.29	1.99	1.69	1.72	1.64	1.8	1.54	1.71	1.94	1.28	1.14	1.32	1.74	2.08	2.21	1.73	1.26	1.44	0.99	1.09	0.93	0.22	1.06	0.84	-1.14	0.2	-1	-1	-0.94	0.99	0.72	0.61	0.27	0.15	0.93	1.48	0.37	0.73	-0.11	0.02	0.93	1.4	-0.29	1.03	1.05	-0.52	0.87	1.02	0.87
RP0014	0.44	1.16	1.26	-0.4	0.77	0.59	0.43	0.16	0.2	0.34	-0.21	0.12	0.06	0.04	-0.11	-0.25	-0.51	-0.4	-0.58	-0.32	-1.03	0.13	0.43	0.44	-0.92	-1.29	-1	-1	-0.47	-0.96	-0.09	-0.38	-0.25	0.22	-1.07	0.02	0.38	-0.78	-0.31	0.3	-0.1	-0.62	-0.51	-0.51	0.96	-0.59	-0.21	-0.33	0.36
RP0015	1.46	0.36	-0.85	0.36	0.04	0.17	0.22	-0.4	-0.42	0.13	-0.24	-0.01	0.54	-0.02	-0.4	0.22	-0.23	-0.14	1.44	-0.19	0.08	0.81	-0.12	0.45	0.98	0.09	1	1	-0.9	-0.29	0.6	0.43	0.1	1	-0.05	-0.45	0.85	-0.2	0.43	1	0.06	-0.44	0.82	0.78	1.86	0.78	1.25	0.67	0.23
RP0016	1.93	1.57	1.25	1.7	1.5	1.61	0.28	0.25	0.46	-0.18	0.01	-0.09	0.59	0.99	1.34	0.56	0.45	0.91	1.15	-0.14	0.36	-0.2	0.04	-0.44	-0.95	0.23	-1	-1	-1.04	0.71	0.03	0.08	-0.47	-0.25	-0.12	0.26	-0.96	0.15	-1.12	-1.17	-0.83	0.67	0.38	0.87	1.27	-0.38	1.09	0.99	0
RP0017	1.57	0.92	1.06	0.03	0.63	0.82	0.47	0.72	0.95	0.38	0.36	0.65	0.21	0.72	0.84	0.06	0.18	0.24	0.96	0.19	-0.24	0.43	0.72	0.67	0.98	-0.66	1	1	-0.64	-0.84	0.9	0.16	0.91	1	0.35	-0.07	0.99	-0.66	0.58	1	0.86	-0.62	0.81	-0.43	1.26	1.03	0.82	0	0.85
RP0018	0.67	0.49	-0.21	0.47	0.55	0.83	1.17	1.55	1.19	1.13	1.58	1.65	0.97	0.89	0.59	0.77	1.37	1.07	1.51	1.67	1.16	0.89	0.65	0.82	0.98	1.45	-0.13	1	0.56	0.58	0.63	1.23	0.94	1	0.16	1.11	1	2.21	0.7	1	0.42	0.9	0.95	1.77	1.18	0.9	1.34	0.64	0.96
RP0019	0.82	2.27	1.26	0.21	1.42	0.2	0.84	0.88	0.57	-0.32	-0.02	-0.53	0.89	1.73	0.52	0.08	0.64	-0.48	-0.14	-0.77	-0.37	0.8	-0.07	0.49	-0.82	-1.55	-1	-1	-0.97	-0.96	-0.68	-0.36	-1.02	-0.82	-0.69	-0.44	-0.06	-0.59	-0.16	-0.52	-0.31	-0.81	0.4	-0.4	1.28	-0.33	1.18	0.29	-0.18
RP0020	1.43	2.26	1.74	1.09	2.22	1.91	0.95	1.18	1.03	0.73	0.88	0.8	1.91	1.72	1.79	0.99	1.71	1.61	1.61	0.49	1.12	0.12	0.46	0.16	-1.09	0.22	-1	-1	-1	0.42	0.7	0.48	0.42	0.61	0.54	0.17	-0.54	0.52	-0.49	-0.85	-0.73	0.51	0.73	1.71	1.6	0.81	1.55	1.01	0.56
RP0021	1.87	1.88	1.23	1.97	1.66	1.31	0.48	1.66	1.06	0.15	1.43	1.04	0.91	1	0.43	0.33	1.02	0.61	2.38	1.86	1.66	0.98	1.5	1.14	1.04	1.73	1	1	1	1	1.17	1.2	1.23	1	1	1.48	1.02	0.7	1.05	1	1	1.2	0.98	2.29	1.07	1	1.91	0.99	1.3
RP0022	1.34	1.22	0.32	1.46	1.07	0.6	0.99	1.47	1.14	0.98	1.41	1.49	1.35	1.46	1.17	1.42	1.34	1.29	1.51	1.2	1.09	1.01	1.44	1.22	1.02	0.29	1	1	1	-0.99	1.14	0.76	0.55	1	1	-0.81	0.98	-0.49	-0.01	1	1	-0.72	0.88	0.79	1.1	0.94	0.99	0.56	1.11
RP0023	2.4	2.21	1.44	1.62	2.19	1.36	1.24	0.49	0.67	1.39	0.57	0.95	1.45	1.24	1.09	1.26	1.07	1.11	2.25	0.69	1.36	0.73	0.89	1.02	0.98	1.97	1	1	-1	0.84	1.03	0.67	0.61	1	0.84	0.45	1	1.19	1.26	1	0.48	1.04	0.99	2.91	1.43	1.03	1.84	1.18	0.99
RP0024	1.62	2	1.75	1.26	1.07	1.13	1.89	0.33	1.13	1.46	0.38	0.94	1.86	1.14	1.68	1.39	0.85	1.32	1.35	0.66	1.26	0.24	0.01	0.29	-1.4	-1.06	0.77	-1.1	-1.02	-0.18	-0.52	-0.18	0.91	0.09	-0.62	0.12	-0.71	-0.3	0.9	-0.18	-0.95	0.13	-0.19	-0.14	1.36	0.45	1.11	0.39	-0.08
RP0025	0.86	1.35	0.95	0.62	0.96	1.29	1.57	1.51	1.26	1.79	1.42	1.73	0.25	0.9	0.34	0.46	0.69	0.58	2.46	1.84	0.8	0.99	0.9	1	1	1.2	1	1	0.23	1.04	0.78	1.11	1.07	1	0.12	1.3	0.89	2.25	0.92	1	-0.29	1.2	1.02	1.96	1.26	1.03	1.2	1.66	1.17
RP0026	1.81	2.46	1.78	1.91	3.26	3.06	0.48	1.12	0.78	0.49	0.89	0.76	0.73	1.95	1.23	0.9	1.65	1.15	1.66	0.28	0.62	-0.08	0.42	0.36	-0.81	0.47	-1	-1	-1.01	0.9	0.59	0.36	-0.07	0.51	0.3	0.02	0.22	0.45	0.19	-0.06	-0.14	0.64	0.23	1.47	1.15	-0.48	1.03	1	0.55
RP0027	0.51	-0.11	0.24	0.75	-0.36	0.28	0.55	-0.74	0.1	0.58	0.15	0.91	0.52	-0.36	0.3	0.91	0.08	0.73	0.05	0.29	0.18	0.98	0.86	0.98	1.02	0.91	-0.92	1	1	-0.89	0.92	1.37	0.81	1	1	0.61	0.92	1.44	0.07	1	1	0.08	1	1.63	0.57	1.01	2.12	-0.91	0.93
RP0028	-0.83	2.53	1.2	-0.26	0.77	0.75	0.17	2.22	1.16	0.5	0.89	0.43	-0.32	2.64	1.49	0.51	0.94	0.57	0.64	0.09	-0.21	0.75	0.03	0.47	1	-0.38	-0.77	1	-0.13	-1.13	-0.34	0.28	0.31	1	-1.16	-0.41	0.72	-0.04	0.1	1	-0.5	-0.85	0.66	0.39	1.05	0.74	0.65	-0.41	0.33
RP0029	1.7	1.63	1.55	1.48	1.44	1.23	0.69	0.63	0.41	0.75	0.7	0.77	0.87	1.22	0.65	0.58	1.23	0.58	1.51	0.31	0.6	-0.24	0.48	0.51	1	0.23	1	1	-0.48	-0.27	0.98	0.66	0.29	1	0.84	-0.34	0.97	0.73	1.35	1	0.29	0.34	0.7	0.93	1.25	0.95	0.83	0.39	0.66
RP0030	1.05	0.13	0.19	0.25	0.23	-0.45	0.17	-0.81	-0.74	-0.48	-0.91	-0.95	0.88	-0.45	-0.44	-0.47	-0.96	-1.17	-0.78	-0.99	-1.18	-0.21	-0.89	-0.63	-0.98	-1.47	-1	-1	-0.98	-1.17	-0.5	-0.02	-0.65	-0.91	0.26	-1.21	-0.94	-1	-0.85	-0.95	-0.52	-1.36	0	-1.24	1.51	-0.25	1.41	-1.56	-1.17
RP0031	2.26	2.69	3.26	1.31	2.41	2.22	2.03	1.86	1.81	1.27	1.17	1.14	2.43	2.56	2.31	0.34	1.81	1.19	-0.15	0.67	0.58	-0.48	0.48	0.27	-0.82	-0.65	-1	-1	-0.8	-0.35	0.57	0.54	0.54	0.46	0.38	0.58	0.28	0.42	0.4	0.03	-0.24	0.31	-0.36	-0.71	1	-0.82	-0.66	-0.1	0.61
RP0032	1.94	1.9	-0.24	2.13	2.89	1.77	0.72	1.71	1.23	1.19	1.8	1.63	0.59	2.22	1.03	1.3	2.36	1.75	1.77	1.9	1.23	0.4	1.1	0.81	1	1	1	1	-0.52	1.04	1.05	1.06	1.2	1	0.97	1.77	1.03	2.19	1.36	1	0.87	1.2	0.79	2.03	1.3	1.03	0.92	0.96	1.2
RP0033	2.32	1.38	2	1.27	1.29	1.58	1.11	0.89	1.5	1.02	0.76	1.15	0.13	1.26	1.44	0.79	1.35	1.42	1.52	0.58	1.22	0.05	0.03	0.17	-0.85	0.87	-1	-1	-1.01	0.76	0.08	-0.07	0.55	0.49	-0.5	0	0.16	0.57	0.26	0	-0.58	0.38	-0.05	1.46	1.12	-0.4	0.34	0.98	0.28
RP0034	1.77	2.65	1.41	0.97	2.11	1.26	0.88	1.86	1.63	1.19	1.37	1.29	-0.74	1.86	0.66	-0.08	1.28	0.48	1.99	1.19	0.82	1.03	0.57	0.87	1	1.56	1	1	-0.99	0.89	0.98	0.32	-0.03	1	0.82	-0.41	0.95	-0.06	0.77	1	0.79	0.26	1.21	2.4	1.39	1	1.52	1.99	1.05
RP0035	2.14	2.26	2.36	1.18	1.07	1.1	1.25	0.69	1.03	1.45	0.78	1.3	1.32	1.21	1.25	1.53	1.01	1.4	1.91	1.52	1.43	0.23	0.61	0.68	0.99	1.34	1	1	-0.99	0.87	0.77	0.86	1.12	1	0.31	1.12	1	1.29	1.19	1	0.56	0.86	0.57	1.94	1.54	0.71	1.16	1.02	0.89
RP0036	1.25	1.79	1.11	0.78	1.1	0.84	1.06	1.37	1.2	0.87	0.76	0.83	0.98	1.4	1.09	0.94	0.84	0.86	0.98	0.47	0.43	-0.75	0.57	-0.01	-1.34	0.31	-1	-1.05	-1.01	0.04	0.73	0.48	0.27	0.53	0.71	0.22	-0.25	0.4	-0.13	-0.59	-0.25	0.39	-0.39	0.23	1.31	-0.33	1.99	-0.68	0.57
RP0037	1.24	-0.18	-0.78	1.14	-0.36	0.46	-0.81	-0.35	-0.64	-0.77	-0.6	-0.62	-0.66	-0.81	-1.28	-0.48	-1.25	-1.43	0.14	0.14	-0.32	-0.57	0.39	-0.11	-0.96	-0.56	-1	-1	-0.55	-0.32	0.53	0.35	0.15	0.24	0.19	0.65	0.34	0.01	0.25	-0.14	0.43	0.34	-1.07	-0.34	0.65	-0.75	-0.93	-0.36	0.49
RP0038	2.31	2.42	2.73	1.26	0.88	1.42	1.94	2.69	2.83	0.82	0.92	1.46	2	2.95	3.12	1.03	1.07	1.57	1.48	1.19	1.07	0.93	0.43	0.8	0.97	-0.84	0.98	1	-1.03	-0.93	0.53	-0.35	1.23	1	-0.25	-0.24	0.91	-0.63	1.07	1	0.01	-0.66	1.66	0.22	1.22	0.95	1.31	0.43	0.67
RP0039	-0.18	-0.4	-0.49	-0.52	-0.94	-0.61	-0.21	-1.14	-0.72	-0.16	-1.13	-0.72	-0.56	-0.92	-0.57	0.14	-0.94	-0.76	0.06	-1.3	-1.04	0.65	0.44	0.54	-0.18	-1.12	-1	1	-0.85	-1	-0.52	-1.45	-1.65	1	-1.2	-1	-0.65	-1.11	-1.3	1	-0.44	-1	-0.44	-0.02	1.76	0.62	0.34	-0.2	-0.36
RP0040	3.03	2.12	2.24	1.52	1	1.17	0.8	-0.16	0.22	0.68	-0.26	0.25	1.7	0.95	0.96	1.29	0.2	0.7	1.65	0.32	0.4	0.63	0.48	0.65	0.68	1.37	1	1	-0.98	1.03	-0.28	-1.28	-0.37	1	-1.3	0.18	-0.07	-0.91	-0.47	1	-0.68	0.15	0.06	1.76	1.38	0.53	1.63	1.02	-0.03
RP0041	0.54	0.76	0.56	0.81	0.6	0.76	-0.03	0.65	0.33	0.1	0.55	0.29	0.23	0.64	0.05	0.53	0.64	0.61	0.59	0.62	0.77	0.29	0.56	0.56	-0.88	0.25	-1	-0.99	-0.79	0.97	0.24	0.37	-0.28	-0.09	-0.07	1.29	0.03	0.92	-0.26	-0.4	0.13	1.06	-0.12	0.67	0.95	-0.84	0.94	1.06	0.45
RP0042	2.19	0.82	1.92	2.1	1.15	2.25	1.58	1.32	1.45	1.31	1.19	1.48	1.8	1.06	1.54	1.22	0.91	1.11	1.91	1.62	1.3	1.01	1.2	1.17	1	1.27	1	1	0.42	1.03	1.14	1.2	1.04	1	1.17	1.34	1.05	1.72	1.08	1	1.14	1.28	1.1	1.95	1.74	1.01	1.2	1.21	1.19
RP0043	2.12	2.82	2.29	1.53	1.45	1.18	0.3	0.55	0.57	0.2	0.39	0.66	1.15	1.44	1.21	0.85	1.01	0.9	1.83	0.8	1.25	-0.04	0.14	0.26	0.96	0.37	0.98	1	-1.08	0.01	0.7	0.89	1.22	1	0.48	0.18	0.98	1.17	1	1	0.21	0.33	0.69	1.12	0.93	0.78	-0.73	0.48	0.51
RP0044	1.78	-0.47	0.19	0.85	-0.14	0.65	1.63	-0.23	0.51	1.49	0.22	0.93	1.69	-0.16	0.69	1.79	-0.03	0.89	1.61	0.88	1.18	1.03	1.03	1.21	1.01	0.51	1	1	-0.99	0.04	1.01	0.62	0.79	1	0.81	0.5	0.99	0.79	1.36	1	0.44	0.78	1.2	1.7	1.36	1.01	1.33	0.93	1.05
RP0045	0.99	2.16	1.13	-0.4	2.27	1.13	0.04	1.98	0.82	-0.15	1.24	0.51	-0.37	1.65	0.36	-0.69	0.86	-0.08	0.65	0.52	0.01	0.22	0.69	0.6	1	0.06	-0.61	1	0.74	-1.03	1.06	1.06	0.68	1	1.18	0.12	1.04	0.07	-0.13	1	1.1	-0.44	0.66	0.79	1.43	1.03	1.11	-1.11	0.89
RP0046	1.62	-0.12	-0.08	0.68	-0.97	-0.3	-0.27	0	-0.4	-1.05	-0.95	-1.15	0.13	-0.26	-0.32	-1.08	-1.29	-1.31	0.13	-1.01	-1.29	-0.97	-0.8	-0.59	-0.78	-1.09	-1	-1	-1.01	-1.09	-0.59	-0.42	-0.87	-0.36	-0.78	-1.21	0.01	-0.95	-0.91	-0.35	-0.43	-1.5	0.24	-0.64	0.94	-0.58	1.14	-1.71	-0.72
RP0047	1.67	3.7	3.37	1.05	3.6	2.58	1.3	1.39	1.48	1.44	1.17	1.38	1.07	2.28	2.2	1.58	1.98	1.93	1.97	1.15	1.23	0.53	1.04	1.01	1	1.51	1	1	-0.99	0.98	1.06	0.67	1.1	1	0.97	0.64	0.95	0.94	1.29	1	0.35	1.01	1.37	2.49	1.86	1.01	1.39	1.06	1.07
RP0048	1.11	2.87	1.26	1.34	3.92	2.61	1.12	1.28	1.4	1.06	1.32	1.35	1.29	2.37	1.79	1.42	2.29	2	2.35	1.06	1.14	0.57	0.96	1.07	1	1.02	1	1	-0.83	0.98	0.98	0.84	1.04	1	0.77	0.93	0.96	1.3	1.23	1	0.32	1.13	1.01	2.09	1.43	1.01	0.94	1.08	1.04
RP0049	0.93	0.64	0.23	0.49	0.34	0.47	-0.27	-0.59	-0.43	0.03	-0.42	0	0.16	0.03	0.16	0.6	0.23	0.44	0.5	-0.48	0.07	0.18	-0.99	-0.3	-1.76	-1.09	-0.75	-1	-1.2	-1	-3.8	-2.32	0.06	-1	-1.65	-1	-3.22	-1.2	1.07	-1.04	-1.74	-1	-2.06	-0.38	0.08	-0.82	-1.33	-0.12	-2.91
RP0050	0.83	1.74	0.66	0.32	0.67	0.47	-0.47	0.78	-0.49	0.07	0.09	-0.11	-1.22	1.17	-0.46	-0.01	-0.14	-0.57	1.48	-0.07	0.01	-0.52	-0.28	-0.37	-0.96	0.81	-1	-1	-1.03	0.7	0.07	0.13	0.02	0.39	-0.23	-0.43	0.06	0.06	0.14	0.05	-0.45	-0.58	0.73	1.46	1.25	-0.2	1.07	0.9	-0.16
RP0051	2.81	1.71	1.22	0.85	2.29	1.37	1.21	0.88	1.07	0.75	0.87	0.84	1.17	1.1	1.13	0.72	0.98	1.02	1.6	0.51	0.76	-0.13	0.33	0.04	-0.92	0.53	-1	-1	-1.03	0.85	0.25	0.24	-0.02	0.03	0.09	0.52	-0.73	0.74	-0.75	-1.06	-0.68	0.62	0.42	1.35	1.25	-0.26	0.5	0.98	0.32
RP0052	2.41	2.17	2.28	1.5	2.61	1.66	1.75	1.3	1.54	1.47	1.22	1.43	1.48	1.3	1.36	0.92	1.25	1.25	0.85	1.4	1.15	-0.05	0.65	0.42	-0.87	0.4	-1	-1	-0.86	0.78	1	0.93	0.88	0.94	0.95	0.81	0.63	1.77	1	0.72	-0.42	0.99	0.12	1.08	1.26	-0.34	0.88	1.02	0.98
RP0053	1.51	-0.27	-0.42	0.89	-0.24	0.41	0.83	0.75	0.76	1.56	1.18	1.42	0.31	0.51	0.08	1.24	0.83	0.99	1.83	1.89	1.23	0.99	1.14	1.01	1	1.02	1	1	-0.7	1.05	1.07	1.13	1.22	1	1.05	1.85	1.04	2.21	1.24	1	1.2	1.16	1	1.87	1.26	1.03	0.37	1.15	1.25
RP0054	1.75	2.39	1.21	0.94	2.41	1.48	1.69	2.18	1.95	1.03	2.03	1.67	1.92	2.16	1.81	1.33	2.16	1.64	1.58	1.46	1.3	0	0.71	0.37	1	0.13	1	1	-0.87	-0.03	0.81	0.47	0.94	1	0.05	1.26	0.95	0.96	1.29	1	0.24	1.07	0.6	1.36	1.19	1	-0.45	0.24	0.95
RP0055	1.5	0.56	1.31	0.99	0.16	0.9	0.18	-0.88	0.1	0.39	-1.18	-0.12	0.6	-0.17	0.84	0.88	-0.51	0.45	1.08	-1.02	-0.39	0.41	0.53	0.62	-0.98	-2.25	-1	-0.96	-1	-0.32	-0.32	-2.33	-1.45	-0.08	-1.3	-0.83	-0.45	-1.77	-1.14	0.45	-0.37	-0.75	-0.63	1.82	1.6	1.48	1.95	0.23	-0.2
RP0056	1.84	0.5	0.87	1.56	0.25	0.75	1.69	-0.22	0.79	1.69	-0.81	0.26	1.44	0.1	0.72	1.71	-0.45	0.26	0.88	0.03	-0.22	1.06	1.16	0.82	-0.01	-0.97	-1	1	-0.92	-1	-0.25	-1.81	-1	1	-1.12	-1	-0.37	-0.78	-1	1	-1.08	-1	-0.13	-0.15	2.08	1.07	1.03	0.38	0.17
RP0057	2.43	-0.2	1.3	1.44	0.2	1.48	1.14	-0.03	0.54	1.39	1.02	1.79	1.67	-0.22	0.62	1.08	0.66	1.41	1.54	1.26	1.02	0.97	0.79	0.87	0.99	0.16	1	1	0.1	-0.32	0.79	0.85	1.08	1	0.08	0.84	1.02	0.88	1.67	1	0.68	0.8	0.96	1.08	1.65	1	1.19	0.69	1.07
RP0058	2.06	1.13	1.24	0.95	1.02	1.2	0.78	-0.27	0.52	-0.32	0.2	0.44	1.48	0.02	0.53	0.53	0.45	0.78	1.7	0.52	0.84	0.89	0.9	0.95	0.91	1.73	1	1	1	1.01	0.99	1.37	0.55	1	1	0.7	0.93	1.74	1	1	1	1.04	0.89	1.91	0.96	0.89	1.81	1.2	0.98
RP0059	-0.26	-0.56	-1.38	-1.19	-1.57	-1.93	-0.03	-0.71	-0.92	-0.84	-0.98	-1.04	1.13	-0.6	-0.44	0.07	-0.92	-0.9	-0.74	-1.1	-1.04	-1.01	-1.34	-1.03	-0.8	-1.05	-1.18	-1	-1.03	-1.31	-1.74	-0.94	-1.7	-1.25	-1.28	-1.52	-0.8	-1.03	-1.4	-0.88	-1.09	-1.46	-0.53	-1.06	-1.28	-0.97	-1.45	-1.46	-1.57
RP0060	3.22	2.54	2.26	2.51	2.24	2.42	2.67	1.77	1.94	1.97	1.74	1.93	2.69	1.73	1.93	2.01	1.56	1.73	1.93	1.32	0.85	0.94	0.64	1	0.96	1.57	-0.85	1	-0.33	0.23	0.85	0.99	-0.28	1	0.73	0.01	0.74	0.42	-0.11	1	0.42	-0.07	0.7	1.55	-0.1	0.8	2.13	-0.51	0.56
RP0061	0.41	0.35	-0.26	-0.74	0.25	-0.33	0.12	-0.57	-0.09	-1.33	-0.22	-0.34	0.19	-0.07	0.11	-0.87	-0.16	-0.31	1.52	-0.73	-0.15	0.89	0.26	0.87	0.89	0.24	1	1	1	-1.05	0.83	1.16	0.55	1	1	-0.62	0.81	-0.03	1	1	1	-1.15	0.88	1.24	0.83	0.88	1.72	0.29	0.38
RP0062	2.11	3.14	2.59	1.23	1.76	2.01	1.09	1.43	1.28	1.06	1.01	1.01	1.31	1.98	2.25	1.32	1.08	1.15	1.46	0.41	0.56	-0.23	0.36	0.44	-0.96	0.16	-1	-0.99	-1.01	0.93	0.54	-0.24	-0.25	0.41	0.28	-0.5	-0.26	-0.69	-0.41	-0.6	-0.41	0.41	0.3	1.42	1.33	-0.15	1.17	0.9	0.47
RP0063	1.83	0.38	1.27	1.5	0.34	1.16	1.72	0.37	1.27	1.47	0.83	1.48	1.92	0.15	1.08	1.27	0.48	0.86	1.31	1.04	0.73	0.96	0.8	0.85	1	-0.02	1	1	-0.47	-0.36	0.84	0.76	1.05	1	0.4	0.8	1.03	0.21	0.72	1	0.9	0.14	1.01	0.25	1.29	0.99	0.64	0.7	1.03
RP0064	2.05	0.69	0.36	1.06	0.63	0.9	0.97	1.1	0.91	0.46	0.82	0.84	1.29	1.07	0.97	0.57	0.86	0.84	1.36	0.79	0.64	0.99	1.06	0.91	0.86	-0.41	1	1	-0.65	-0.61	0.68	-0.14	0.22	1	-0.28	0.99	0.64	-0.35	0.84	1	0.45	0.66	1.03	0.91	1.27	1.02	0.53	0.56	0.87
RP0065	2.42	1.02	1.96	0.95	0.34	0.7	1.09	0.23	0.71	0.6	-0.29	0.47	1.75	0.44	0.92	0.56	-0.22	0.2	1.02	-0.54	-0.28	0.83	0.02	0.69	0.98	0.66	-1.12	1	1.19	-1.07	0.54	1.28	0.54	1	0.35	-0.27	0.97	0.92	0	1	0.53	-0.57	0.83	1.13	1.38	0.81	1.45	-0.75	0.37
RP0066	2.24	2.63	2.24	1.96	2.08	2.15	0.51	1.13	0.82	0.48	0.95	0.72	0.51	1.62	1.44	0.59	1.32	0.91	1.72	0.62	0.43	0.52	0.57	0.42	-1.16	0.48	-1	-1	-1.02	0.73	0.73	0.57	0.31	0.42	0.75	0.46	-0.43	0.36	-0.64	-0.85	-0.17	0.68	1.26	1.86	1.59	1.38	1.3	1.12	0.6
RP0067	2.88	1.81	1.89	2.32	1.36	1.72	2.1	2.22	2.44	2.38	2.12	2.46	2.26	1.92	2.15	2.51	1.66	1.97	1.69	2.24	1.54	1.07	0.09	0.45	0.68	-0.14	-0.84	1	1	-1	0.95	0.6	-0.65	1	1	-1	0.77	-0.45	-1	1	1	-1	1.09	2.67	1.81	0.86	2.83	1.17	1.33
RP0068	2.38	3.69	3	0.45	1.32	0.78	1.78	2.66	1.79	1.08	1.25	0.96	2.21	3.34	2.65	1.86	1.74	1.45	0.59	0.26	0.81	0.9	0.49	0.71	1	-0.55	1	1	-0.75	-0.9	0.26	-0.1	0.15	1	-0.66	-0.13	0.65	0.3	0.52	1	-0.57	0.16	0.97	0.42	1.33	0.9	0.68	0.42	0.55
RP0069	0.9	0.21	-0.35	0.27	-0.14	-0.37	-0.2	0.08	0.32	0.15	0.13	0.39	0.02	0.03	-0.07	-0.62	-0.03	0.12	-0.34	-0.42	-1.17	0.81	0.32	0.49	-0.98	-1.59	-1	-1	-0.5	-0.82	-1.43	-1.77	-0.89	-1.74	-0.98	0.28	-0.92	-1.48	-1.02	-1.11	-0.6	-0.15	-0.58	-0.3	0.78	-0.88	0.4	0.33	-0.55
RP0070	2.03	2.06	1.59	1.16	0.95	1.34	1.06	2.46	1.33	0.45	0.91	0.64	1.83	2.75	1.89	0.64	0.98	0.73	1.13	-0.33	-0.31	0.83	-0.11	0.45	-0.79	-0.18	-1	-1	-1.02	-0.45	-0.47	-0.34	-0.43	0.19	-1.04	-0.47	0.25	-0.65	-0.6	0.2	-0.43	-0.86	0.52	1	1.2	-0.12	1.32	0.63	-0.18
RP0071	1.14	0.93	0.55	1.76	0.25	1.22	1.6	-0.29	0.4	2.61	0.11	1.56	1.03	-0.33	0.15	2.13	0	1.42	1.43	0.39	0.3	0.63	0.1	0.68	0.93	-0.13	0.99	1	-0.84	-1.31	0.42	0.75	1.22	1	0.19	-0.81	0.9	-0.22	1.01	1	-0.15	-1.57	0.43	0.33	1.15	0.53	2.14	-0.24	0.4
RP0072	0.1	-0.89	0.02	-0.3	-0.86	-0.17	0.89	-0.69	0.34	-0.25	-0.64	-0.24	0.35	-1.2	-0.22	-0.65	-1.07	-0.73	-0.31	-0.66	-0.8	-0.46	-0.01	0.03	-0.88	-1.1	-1	-1	-0.82	-0.94	0.01	0.24	-0.84	-0.54	0.09	0.02	0.26	-0.47	0.09	-0.2	0.6	-0.66	-0.54	-0.3	0.92	-0.62	-0.74	-0.18	0
RP0073	1.74	1.01	0.81	1.31	1.01	1.21	1.66	1.28	1.52	1.48	1.26	1.65	1.56	1.03	1.17	1.48	1.03	1.2	1.41	1.41	1.05	0.97	1.38	1.18	1.04	0.09	1	1	1	-1.01	1.16	0.79	1	1	1	-0.44	1.02	-0.46	0.87	1	1	-0.74	0.96	1.27	1.07	0.98	1.91	0.73	1.15
RP0074	1.55	1.33	1.42	1.42	1.04	1.01	0.95	0.58	0.74	0.98	1.02	1.09	1.08	0.88	1.14	1.1	0.88	0.88	1.3	0.9	0.74	1.03	0.38	1.17	1.03	-0.08	1	1	1	-0.99	1.17	0.65	1	1	1	-1.15	1.02	-0.49	0.87	1	1	-1.27	1.03	0.86	1	0.99	0.99	0.58	0.5
RP0075	1.55	0.25	0.55	0.25	-0.23	0.46	2.39	0.27	2.08	0.68	0.3	0.88	2.37	0.12	1.83	0.25	-0.03	0.56	0.38	0.08	-0.59	0.81	0.21	0.53	0.91	-1.14	-1.01	1	-0.95	-0.95	-0.72	-1.56	0.61	1	-1.48	-1.56	0.48	-1.19	0.45	1	-1.06	-1.68	1.06	-0.81	0.11	0.81	0.09	-0.1	0.15
RP0076	2.46	1.55	1.63	1.52	0.62	1.15	2.93	1.7	2.04	1.99	1.31	1.75	2.89	1.65	2.07	1.98	1.24	1.42	1.78	1.37	1.23	1	1.3	1.02	1.02	1.13	-0.07	1	1	-0.41	1.06	1.34	1.21	1	1	1.71	0.97	1.81	1.05	1	1	1.44	1.05	1.96	0.98	1.04	1	-0.18	1.31
RP0077	0.89	-0.34	0.44	0.29	-0.93	-0.47	-0.42	-1.83	-1.49	-0.23	-1.46	-1.11	0.09	-1.47	-1.1	-0.15	-1.57	-1.38	0.6	-0.64	-0.75	0.9	0.15	0.74	1	0.07	1	1	1.08	-1.05	0.86	0.72	0.22	1	0.33	-0.47	0.94	-0.41	0.84	1	0.55	-0.88	0.92	0.73	1.33	0.9	1.1	0.31	0.41
RP0078	2.79	3.1	3.54	0.75	1.04	0.96	2.25	1.61	2.23	1.01	0.74	0.88	2.4	2.07	2.39	0.58	0.68	0.53	1.03	0.63	0.75	-0.05	0.13	0.14	0.98	-0.06	1	1	-0.81	-0.58	0.38	0.73	0.76	1	-0.29	0.25	0.73	1.09	0.78	1	-0.58	0.37	0.6	0.52	1.27	0.73	1.04	0.52	0.56
RP0079	2.9	0.8	1.25	1.54	0.45	1.2	2.56	1.34	1.84	2.27	1.32	2.1	2.85	1.25	1.71	1.93	1.08	1.57	1.56	1.64	1.35	0.92	0.91	0.84	1	1.01	1	1	-0.68	1.01	0.67	0.67	1.05	1	-0.3	0.98	0.99	0.87	1.28	1	0.62	0.93	0.96	1.65	1.64	0.93	1.03	1.22	1.13
RP0080	0.96	1.02	0.77	0.89	0.71	0.73	1.94	1.03	1.51	1.22	0.79	1.14	1.47	1.02	1.12	1.18	0.66	0.93	1.31	0.52	0.58	0.99	1.02	0.99	1.02	0.36	1	1	1	-0.97	1.07	1.17	0.85	1	1	0.36	1	0.05	1.09	1	1	-0.32	1.07	1.49	0.98	1.02	1	0.53	1.1
RP0081	2.44	3.36	3.02	2.06	2.8	2.61	1.25	3.43	2.75	1.43	2.45	2.31	0.93	3.33	2.66	1.02	2.23	2.09	2.24	1.79	1.32	1.02	1.12	1.07	1.01	0.23	1	1	-0.2	-0.35	0.96	0.71	1.18	1	0.73	0.99	0.98	0.14	0.86	1	0.7	0.36	1.17	1.07	1.51	1.02	1.65	0.78	1.08
RP0082	1.28	1.57	0.5	0.17	0.93	0.82	0.46	0.21	-0.05	0.39	0.01	0.39	0.81	0.24	0.16	0.29	-0.26	-0.04	0.52	0.21	-0.56	1.06	0.8	0.9	1.01	-0.57	1	1	-0.78	-0.76	0.3	-0.26	0.36	1	-1.05	0.46	0.78	-0.61	0.2	1	-0.02	-0.25	1.17	0.45	1.82	0.97	1.08	0.62	0.71
RP0083	1.37	0.42	0.91	1.36	0.34	0.86	0.57	-0.28	0.31	0.69	-0.34	0.45	1.33	0.17	0.65	1.19	-0.09	0.25	1.44	-0.25	-0.24	1.14	1.15	1.01	-0.97	-2.05	-1	-0.96	-1	-0.12	0.71	-0.51	-0.6	0.26	0.61	-0.29	0.48	-1.23	-1.09	0.66	1.15	-0.48	0.42	2.13	1.65	1.76	1.97	0.83	0.76
RP0084	1.18	1.63	2.22	0.57	1.54	1.55	0.73	1.74	1.84	0.65	0.78	0.69	0.52	1.82	2.47	0.5	1.18	0.9	1.5	-0.11	0.06	1.02	1	1.14	1	0.37	1	1	0.54	-0.6	0.84	0.73	0.22	1	0.24	0.31	0.96	0.24	0.65	1	0.33	0.18	1.14	1.11	1.95	1.02	1.31	0.68	0.9
RP0085	1.16	-0.43	0.37	1.35	-0.23	0.98	0.79	-1.26	0.28	0.86	-1.17	0.2	0.7	-1.08	0.27	1.3	-0.89	0.36	1.01	-1.24	-1.17	0.97	0.72	0.71	-0.01	-0.78	-1	1	0.23	-1	-0.25	-0.96	-1	1	-0.99	-1	-0.37	-0.99	-1	1	-0.29	-1	-0.1	0.93	1.98	0.99	0.68	0.22	-0.04
RP0086	-0.93	-0.68	-0.98	-0.99	-0.96	-0.97	0.56	0.44	0.66	0.58	0.49	0.98	0.19	0.44	0.4	0.31	0.4	0.5	-0.03	0.26	-0.1	0.53	1.84	1.38	0.68	-0.14	-0.84	1	1	-1	0.95	0.6	-0.65	1	1	-1	0.77	-0.45	-1	1	1	-1	-0.52	0.4	0.64	0.4	0.85	-0.92	0.93
RP0087	1.62	0.86	0.73	1.19	1.58	1.46	1.51	1.34	1.4	1.8	1.65	1.79	0.94	1.37	1.17	1.39	1.72	1.58	1.92	1.45	1.26	0.43	0.98	0.85	1.01	1.15	1	1	0	1.03	1.06	1.19	1.17	1	1.15	1.39	1.05	1.79	1.22	1	1.03	1.16	0.84	1.89	1.26	1.03	0.88	1.02	1.09
RP0088	2.36	0.38	-0.31	1.17	0.43	1.1	0.31	0.55	0.32	0.35	0.53	0.5	0.49	0.52	0.28	0.41	0.76	0.69	1.38	0.59	0.92	0.14	0.36	0.21	0.92	0.2	1	1	-0.79	-0.53	0.92	0.81	1.03	1	0.79	0.06	1	0.81	1.39	1	0.16	0.29	0.48	0.52	1.43	0.62	1.21	0.57	0.65
RP0089	2.88	1.68	1.8	2.26	1.22	1.56	2.13	2.12	2.4	2.4	2.09	2.44	2.32	1.9	2.17	2.52	1.62	1.96	1.57	2.27	1.57	0.35	-0.26	0.12	0.68	-0.14	-0.84	1	1	-1	0.95	0.6	-0.65	1	1	-1	0.77	-0.45	-1	1	1	-1	0.9	2.21	1.2	0.09	2.78	0.68	1.24
RP0090	0.91	0.46	-0.11	-1.4	0.38	-0.48	0.02	0.28	0.15	-0.67	0.53	0.08	-0.21	0.28	0.04	-1.13	0.2	-0.44	0.98	0.02	-0.36	-0.67	-0.27	-0.4	1	0.06	-0.61	1	0.64	-1.1	0.93	1.02	1.09	1	1.06	-0.31	1.04	-0.1	0.47	1	0.88	-0.95	0.03	0.33	0.91	0.61	1.3	-1.68	0.34
RP0091	1.63	1.67	1.5	1.79	1.21	1.75	0.72	0.62	0.58	0.46	0.15	0.11	1	0.79	0.9	0.72	0.33	0.27	0.82	-0.44	-0.07	-0.2	-0.03	-0.17	-1.07	0.36	-1	-1	-0.81	0.79	-0.05	0.51	-0.95	-0.58	0.13	0.39	-0.22	0.68	-0.98	-0.76	0.24	0.58	-0.05	0.96	1.17	-0.35	1.07	1.01	-0.11
RP0092	1.9	1.38	0.67	0.96	1.21	0.89	1.2	1.07	1.07	0.87	1.14	1.33	1.55	1.39	1.17	1.17	1.07	0.85	1.91	1.63	1.35	0.44	1	0.81	1	1.12	1	1	-0.17	1.04	1.03	1.08	1.11	1	0.98	1.45	1.03	1.87	1.28	1	0.76	1.24	0.81	1.85	1.61	1.03	1.01	1	1.14
RP0093	0.47	0.76	0.16	-1.37	-0.25	-0.68	0.74	0.37	-0.04	-0.02	-0.06	-0.49	0.47	0.6	0.18	-0.33	-0.3	-0.7	-0.13	-0.31	-1.04	0.89	0.06	0.65	0.93	-0.81	1	1	-0.31	-0.98	0.49	-0.04	0.89	1	-0.16	-0.94	0.7	-0.88	0.71	1	0.18	-1.45	0.74	0.27	1.33	0.88	0.7	0.42	0.2
RP0094	1.69	0.83	0.11	0.45	0.61	0.22	0.34	0.76	0.5	0.57	1.11	0.66	0.16	0.63	-0.2	0.04	0.74	0.1	0.94	0.82	0.23	-0.45	-0.36	-0.45	1	-0.44	1	1	-0.24	-0.89	0.59	0.29	0.48	1	-0.4	0.54	0.85	-0.29	0.42	1	0.35	-0.12	0.27	0.47	1.15	0.8	-0.69	-0.64	0.51
RP0095	1.11	-0.43	-0.53	1.29	-1	-0.69	0.49	0.13	-0.03	0.2	-0.06	-0.01	-0.59	-1.41	-1.59	-0.85	-1.7	-1.93	0.49	0.11	-1	-0.79	0.11	-0.34	-0.95	-0.2	-1	-1	-0.05	-1.23	0.58	0.61	-0.51	-0.2	0.97	-1.3	0.06	-0.53	-0.81	-0.57	0.66	-1.48	-0.92	-0.93	1.07	-0.38	-1.33	-1.93	0
RP0096	1.97	1.21	0.82	1.87	1	1.46	1.48	1.45	1.28	1.45	1.49	1.66	1.83	1.27	0.98	1.41	1.34	1.26	1.81	2	1.51	0.97	1.28	1.05	0.99	1.21	1	1	-0.92	1.05	1.11	1.04	1.14	1	1.02	2.01	1.03	1.14	0.61	1	1.28	1.41	0.98	2.18	1.29	0.98	1.07	1.1	1.28
RP0097	0.94	-0.27	0.64	-0.51	-0.02	0.57	0.73	-0.21	0.29	0.15	-0.23	0.1	1.12	-0.05	0.78	0.07	0.16	0.71	-0.84	-0.86	-0.41	-1.06	-0.26	-0.47	-0.84	-1.05	-1	-0.99	-0.93	-0.46	-0.24	-0.04	-0.78	-0.48	-0.64	-0.01	-0.67	-0.31	-0.89	-1.01	-0.71	0.09	-0.65	-0.7	0.93	-1.35	0.79	0.13	-0.21
RP0098	1.58	1.22	0.18	1.03	1.04	0.64	0.38	0.68	0.57	0.49	0.68	0.81	0.11	0.92	0.07	0.51	0.68	0.69	0.53	0.43	0.5	0.12	0.02	0.05	-0.82	-0.52	-1	-1	-0.99	-0.45	0.56	0.4	0.62	0.78	0.19	-0.31	0.49	0.25	0.91	0.4	-0.23	0.06	0.41	0.36	1.24	-0.14	1	0.58	0.48
RP0099	1.5	1.76	1.59	0.48	1.01	0.78	0.76	0.56	0.24	-0.24	-0.12	-0.31	0.76	0.77	0.84	0.01	0.15	-0.11	-0.05	-0.55	-0.4	-1.32	-0.49	-0.76	-0.77	-1.49	-1	-1	-1.01	-0.92	-1.05	-1.01	-1	-0.74	-1.25	-0.31	-0.93	-1.12	-1.32	-1.15	-1.1	-0.55	-1.1	-0.35	0.68	-1.51	-0.84	-0.65	-0.6
RP0100	1.79	1.38	0.4	0.15	1.53	0.2	-0.17	-0.17	-0.71	-1.01	0.14	-0.65	-0.32	0.62	-0.46	-1.08	0.73	-0.67	1.8	-0.15	0.12	0.94	0.62	0.79	0.99	0.84	1	1	0.77	0.07	0.66	0.65	0.24	1	-0.39	0.44	0.89	0.04	0.79	1	0.39	0.29	0.88	1.36	1.36	0.96	1.46	1.62	0.7
RP0101	1.63	2.89	3.25	1.05	2.18	1.9	0.81	1.95	1.92	0.74	1.23	0.88	1.38	2.36	2.59	0.79	1.37	0.87	1.53	0.88	1.07	-0.25	0.46	0.32	-0.81	0.87	-1	-1	-1	0.97	0.64	0.71	0.71	0.68	0.35	0.68	0.45	1.11	0.65	0.27	-0.1	0.74	-0.26	1.5	0.91	-0.42	0.98	0.89	0.69
RP0102	1.55	2.76	3.09	-0.06	1.77	1.5	0.62	1.2	0.95	0.76	0.87	0.96	0.72	1.75	1.06	0.79	1.18	0.92	0.26	0.53	1.02	-0.24	0.28	0.4	-0.79	-1.05	-1	-1	-1.03	-0.26	0.31	0.32	0.62	0.59	-0.21	0.21	0.16	0.31	0.55	0.27	-0.82	0.45	-0.13	0.02	1.01	-0.9	1.08	0.09	0.54
RP0103	3.53	4.17	3.83	2.61	3.53	3.55	2.1	1.65	1.91	1.52	1.27	1.66	2.2	2.69	2.98	2.16	2.09	2.54	1.77	0.47	1.19	-0.13	0.47	0.32	0.99	0.73	1	1	-1	0.19	0.7	0.65	0.65	1	0.01	0.42	0.91	1.17	1.01	1	-0.1	0.74	0.58	1.73	1.24	0.79	1.03	0.49	0.8
RP0104	1.11	1.07	1.46	-0.08	0.01	-0.22	-0.06	0.2	-0.13	-0.38	-0.49	-0.58	0.86	-0.09	0.57	-0.26	-1.08	-1.23	0.17	-0.68	-0.84	-0.08	0.04	-0.01	-0.78	-1.39	-1	-1	-1.02	-1.4	0.48	-0.07	-0.36	0.35	0.23	-1.14	0.18	-1.04	-0.04	-0.13	-0.39	-1.34	0.36	-0.64	1.51	-0.29	1.42	-1.25	0.11
RP0105	0.74	1.33	0.35	0.72	1.39	0.67	0.44	1.4	0.9	0.86	1.38	1.07	-0.54	1.19	0.12	-0.11	1.17	0.22	0.82	1.34	0.96	0.95	0.8	0.86	-0.94	0.2	-1	-0.99	-0.81	0.97	0.91	0.71	0.66	0.56	1	1.14	0.54	0.73	0.36	0.31	0.77	1.2	0.05	0.8	1.02	-0.58	1.02	1.24	1.08
RP0106	1.37	0.88	0.43	0.49	0.27	1.15	1.17	0.08	0.24	1.05	0.39	0.8	0.03	0.28	-0.23	0.43	0.2	0.5	0.52	0.46	0.59	0.8	0.63	0.89	-1.12	-0.34	-1	-0.99	-0.63	0.17	0.56	0.6	0.44	0.27	0.47	0.91	0.36	0.65	0.41	0.19	0.21	0.83	-0.04	0.43	1.28	0.15	0.56	0.86	0.72
RP0107	0.73	0.56	1.17	0.8	-0.44	-0.55	1.63	0.65	1.2	0.85	0.49	0.55	1.9	0.57	1.64	0.79	0.2	0.06	0.02	-0.16	-0.22	0.05	0.09	0.21	-0.99	-0.95	-1	-1	-0.98	-0.82	0.06	0.28	-0.41	-0.26	0.17	-0.19	-0.24	0.02	-0.09	-0.66	-0.21	-0.35	0.19	-0.7	1.24	-0.04	0.98	-0.42	0.01
RP0108	1.84	1.3	0.86	1.01	0.91	1.06	2.11	1.56	2	2.24	1.66	2.12	1.63	1.25	1.74	1.4	1.08	1.39	1.56	1.95	1.13	0.3	0.47	0.52	1	0.54	1	1	0.57	-0.41	1.13	1.36	0.96	1	1.16	0.84	1.04	1	1.19	1	1.08	0.7	0.74	0.61	1.24	0.95	0.39	0.27	1.19
RP0109	1.08	-0.12	-0.37	0.53	0.2	0.04	1.11	0.53	0.51	0.81	0.89	1.1	1.31	-0.15	0.01	0.48	0.18	0.41	1.15	0.8	0.38	1.03	0.89	1.07	0.85	0.68	1	1	1	-0.9	1.06	1.21	1.23	1	1	0.46	0.91	0.66	1	1	1	0.07	0.87	1.11	1.01	0.98	0.99	0.51	0.96
RP0110	1.37	1.17	0.76	1.1	0.45	1.25	1.38	0.84	1.18	1.42	0.68	1.2	0.28	0.36	0.14	1.32	0.42	1.01	1.47	0.82	1	0.84	0.7	0.77	-0.8	0.62	-1	-0.96	-1.03	0.83	0.5	0.03	-0.18	0.09	0.24	1.36	0.14	0.16	0.07	0.02	-0.28	1.19	0.48	1.41	1.21	0.72	1.25	1.2	0.59
RP0111	0.86	1.04	0.23	0.33	1.28	0.78	1.38	1.1	1.26	0.97	1.3	1.29	1.19	1.39	0.87	0.89	1.64	1.35	2.04	1.26	1.14	0.97	0.9	0.98	1	0.72	1	1	-0.21	0.5	0.96	0.96	1.2	1	0.88	0.93	1.01	1.18	1.32	1	0.38	0.96	1.01	1.65	1.29	1	1.14	1.54	1.1
RP0112	1.26	2.99	2.59	0.96	2.35	1.39	0.56	0.24	0.41	0.17	-0.06	0.13	0.77	2.1	1.68	1.01	1.1	0.93	0.56	-0.56	-0.08	-0.67	-0.5	-0.66	-0.81	-0.12	-1	-1	-1.01	0.03	-0.55	0.13	-1.05	-0.69	-0.56	-0.08	-0.71	0.17	-0.78	-1.03	-0.93	0.07	-0.49	0.58	1.01	-0.67	0.95	0.07	-0.47
RP0113	1.73	1.01	1.33	1.35	0.88	1.29	1.64	1.3	1.52	1.87	1.32	1.68	1.55	0.63	1	1.53	0.61	0.95	1.95	1.78	1.21	1.01	0.88	0.94	1	1.45	1	1	0.8	1.03	1.13	0.97	0.75	1	1.21	0.32	1.04	0.64	1.03	1	1.09	0.73	1.09	2.02	1.33	1.02	1.34	1.23	1.2
RP0114	1.55	-0.02	0.45	0.47	-0.53	-0.06	1.25	-0.01	0.47	0.65	-0.41	-0.43	1.04	-0.26	-0.05	0.56	-0.55	-0.65	0.23	-1.45	-1.44	1.03	0.94	1.08	-0.01	-0.35	-1	1	0.99	-1	0.53	0.34	-1.74	1	0.31	-1	0.09	-0.59	-0.95	1	0.56	-1	-0.33	0.74	1.75	1.01	1.43	-0.68	0.46
RP0115	2.1	2.4	2.12	1.28	2.02	2.38	1.72	1.16	1.41	0.99	1.08	0.98	2.63	1.89	2.46	1.92	1.41	1.7	1.92	0.83	1.08	0.15	0.21	0.22	-1.03	0.81	-1	-1	-1	0.85	0.78	0.65	0.56	0.78	0.67	0.03	0.15	0.9	0.6	0.14	-0.35	0.66	0.45	1.66	1.37	0	1.33	1.03	0.68
RP0116	1.49	0.38	0.88	1.13	0.55	0.99	0.2	-0.47	-0.24	0.33	-0.2	0.21	1.1	-0.01	0.25	0.79	0.06	0.34	1.83	-0.27	-0.25	0.95	0.96	0.84	1.02	1.11	1	1	-0.89	1	0.62	-0.23	-0.51	1	-0.57	0.43	0.71	-0.57	-0.72	1	0.66	0.03	1	1.92	1.3	0.97	1.05	1.22	0.78
RP0117	1.19	1.13	0.91	0.8	1.34	0.65	0.46	0.75	0.82	0.46	0.25	0.39	0.6	1.13	1.03	0.48	0.81	0.67	0.48	0.22	0.44	0.89	0.7	0.82	-0.9	0.32	-1	-0.99	-0.61	1.03	0.37	0.21	-0.07	-0.11	-0.01	1.28	0.43	-0.2	-0.07	0.22	0.65	0.64	0.21	0.65	1.81	0.59	1.27	1.1	0.51
RP0118	0.36	2.16	0.7	0.71	1.18	0.63	0.75	1.09	1.05	1.22	1.07	1.34	-0.14	1.46	0.9	1.05	1.24	1.32	1.74	0.82	1.05	0.19	0.46	0.41	1.01	0.83	1	1	-0.42	0.57	0.66	0.69	1.04	1	0.06	0.48	0.93	0.83	1.11	1	0.16	0.63	0.72	1.42	1.25	0.89	-0.03	1.21	0.81
RP0119	2.14	1.31	1.57	2	1.56	1.7	1.5	0.72	0.53	1.12	1.52	1.4	1.84	0.48	0.45	1.16	1.14	0.96	1.71	1.04	0.74	1.02	1.04	1.04	0.99	0.74	1	1	0.61	0.06	1.08	1.06	1.08	1	1.19	0.59	1.04	0.24	0.53	1	1.13	0.11	1.01	1.44	1.95	1.02	1.28	0.86	1.11
RP0120	1.3	2.63	0.96	1.48	2.16	1.57	1.36	1.76	1.33	0.72	1.42	0.89	1.56	2.02	1.07	1.71	1.91	1.61	1.85	1.33	1.43	0.93	0.71	0.85	0.96	1.44	1	1	-0.99	1.03	0.57	-0.05	1.12	1	-0.42	0.74	0.7	0.34	1.27	1	-0.69	0.78	1.56	2.28	1.64	0.95	1.33	1.2	0.88
RP0121	0.04	1.36	0.47	0.74	1.26	0.77	-0.22	0.62	0.39	0.59	0.77	0.75	-0.25	0.98	0.53	0.44	1.02	0.59	1.77	0.48	0.59	1.03	0.83	1.14	0.97	1.1	1	1	-0.14	0.86	0.98	0.95	0.76	1	0.86	0.43	0.99	0.87	0.69	1	0.39	0.64	1.14	1.64	1.4	0.99	1.16	1.29	0.95
RP0122	0.6	1.65	0.55	0.25	1.22	0.3	-0.42	0.48	0.28	-0.2	0.7	0.64	-0.52	0.58	-0.02	-0.47	0.59	0.25	1.57	0.75	0.78	1.03	0.93	1.07	0.9	1.06	1	1	1	-0.32	1.09	1.18	1.09	1	1	0.59	0.98	0.23	1.13	1	1	-0.05	0.95	1.54	1.05	1.01	1.94	0.79	0.98
RP0123	0.91	1.5	0.88	0.07	0.19	0.91	-0.27	1.71	0.37	-0.33	1.2	0.59	-0.4	1.26	0.55	-0.25	0.66	0.5	1.03	0.7	0.09	0.88	0.55	0.64	1	-0.62	1	1	-0.57	-0.83	0.05	-0.2	0.65	1	-1.1	0.23	0.79	-0.33	1.02	1	-0.32	-0.21	0.8	0.73	1.27	0.89	0.32	0.39	0.73
RP0124	1.39	-0.37	-0.9	0.96	1.14	0.8	0.76	0.75	0.83	1.12	1.28	1.19	0.85	0.65	0.31	0.87	1.55	1.24	1.87	1.49	1.4	0.98	1.11	1.17	1	0.71	1	1	-0.23	0.55	1.04	0.97	1.01	1	0.92	1.49	1.02	1.29	1.09	1	0.88	1.36	1.07	1.48	1.48	0.91	1.05	1.02	1.11
RP0125	2.09	3.15	2.82	1.41	2.08	1.72	1.91	1.49	1.6	1.72	1.56	1.76	1.87	2.25	2.08	1.04	1.66	1.52	1.08	1.09	1.06	0.25	0.63	0.52	-1.04	0.18	-1	-0.99	-0.99	0.86	0.65	0.55	0.7	0.53	0.51	0.89	-0.14	0.81	0.23	-0.3	-0.1	0.88	0.32	0.49	1.21	-0.26	0.96	1.1	0.73
RP0126	2.31	1.85	1.55	2.01	1.61	1.79	1.75	1.62	1.56	1.6	1.43	1.84	1.97	1.52	1.45	1.62	1.47	1.42	2.06	1.24	1.09	1	1.38	1.02	1.02	1.73	1	1	1	1.05	1.06	1.2	0.55	1	1	0.88	0.97	2.47	1	1	1	1.15	1.04	2.33	1.07	1.04	2.12	1.02	1.37
RP0127	2.18	1.21	2.1	1.26	0.8	0.81	1.8	0.95	1.17	1.73	0.83	1.21	2.1	0.89	1.05	1.68	0.72	0.92	1.41	1.08	1.19	0.31	0.42	0.54	0.97	0.07	1	1	-0.96	-0.33	0.69	0.73	1.14	1	0.37	0.43	0.86	0.77	1.17	1	-0.09	0.26	0.96	1.08	1.35	0.92	1.04	0.35	0.72
RP0128	0.9	0.68	0.4	0.74	0.29	0.17	1.51	1.34	1.39	1.13	1.19	1.35	1.11	1.03	0.81	0.55	0.93	0.55	0.88	1.03	0.64	0.41	1.28	0.94	-1.03	0.31	-1	-0.96	-0.92	1.05	0.85	0.04	0.29	0.09	1.07	1.21	0.39	-0.43	0.6	0.17	1.07	1.39	-0.71	1.95	1.14	0.27	1.05	1.43	0.97
RP0129	2.53	1.37	0.59	0.94	0.89	-0.1	2.68	1.9	2.06	1.89	1.44	1.65	2.93	1.85	2.02	1.9	1.38	1.29	2.11	1.93	1.5	1.03	1.03	1.06	1	1.1	1	1	-0.36	0.97	0.99	1.11	1.22	1	0.9	1.66	1.03	1.8	1.24	1	0.77	1.16	1.19	1.75	1.36	1.01	0.87	2.1	1.16
RP0130	0.83	1.09	0.32	0.67	1.11	0.98	2.04	2	2.15	1.73	1.74	2	1.7	1.84	1.66	1.46	1.7	1.7	1.95	2	1.8	0.83	1.17	0.95	0.99	1.59	1	1	0.94	1.05	1.1	1.34	1.18	1	1.21	1.99	1.03	1.39	1.08	1	1.05	1.57	0.76	1.72	1.4	0.81	0.94	1.15	1.21
RP0131	1.47	0.71	-0.19	-0.02	-0.02	-0.46	-0.46	0.7	0.17	0.76	1.06	0.97	-0.14	0.6	-0.66	0.69	0.96	0.66	1.89	0.77	0.89	0.82	0.31	0.67	0.97	0.69	1	1	-0.87	0.44	0.35	1.04	0.37	1	-0.36	0.54	1.01	1.5	0.09	1	0.25	0.35	0.84	1.21	1.49	0.79	0.64	1.01	0.67
RP0132	1.8	1.66	1.12	1.41	0.84	0.91	1.13	0.83	1.06	0.67	0.63	0.88	1.03	0.94	0.8	0.66	0.59	0.57	1.52	0.64	0.6	-0.01	0.24	0.25	1.01	0.05	1	1	-0.32	-0.36	0.88	0.83	1.16	1	0.73	0.47	1.04	0.37	1.11	1	1.07	0.08	0.5	0.19	1.25	0.82	0.81	0.1	0.68
RP0133	1.43	0.35	0.07	0.77	-0.47	-0.45	1.08	-0.06	0.51	0.69	-0.24	0.58	1.2	0.27	0.47	1.24	-0.17	0.31	1.42	-0.22	0.08	0.87	0.74	0.75	-0.97	0.35	-1.01	-1	-0.98	0.58	-0.08	-0.37	-1.56	-1.3	0.56	0.9	-0.14	-0.48	-0.53	-0.59	0.95	0.38	-0.23	1.4	1.41	-0.42	1.23	0.27	0.08
RP0134	2.68	1.41	1.59	2.02	0.81	1.3	2.15	1.87	2.3	2.4	1.98	2.36	2.36	1.81	2.16	2.46	1.51	1.89	1.36	2.27	1.56	-1.28	-0.97	-0.59	0.68	-0.14	-0.84	1	1	-1	0.95	0.6	-0.65	1	1	-1	0.77	-0.45	-1	1	1	-1	0.14	-0.67	0.36	-1.76	2.69	-0.3	0.91
RP0135	0.69	0.15	-0.05	0.12	-0.24	-0.15	0.96	0.76	1.02	0.99	0.8	1.24	0.91	0.93	1.07	1	0.76	0.95	0.45	0.69	0.43	0.94	1.47	1.26	0.68	-0.14	-0.84	1	1	-1	0.95	0.6	-0.65	1	1	-1	0.77	-0.45	-1	1	1	-1	0.42	1.38	-0.37	0.97	1.91	-0.37	0.91
RP0136	0.53	1.77	1.63	0.42	1.44	1.08	0.45	0.85	1.17	0.67	1.21	1.29	0.24	1.1	0.95	0.53	1.15	1.16	1.56	1.02	0.92	0.97	0.9	0.92	0.99	-0.48	1	1	-0.11	-0.97	0.96	0.91	1.05	1	0.89	0.51	1.08	0.02	1.13	1	0.86	-0.16	0.96	0.43	1.39	1	0.9	1.02	1.1
RP0137	0.92	1.21	0.95	0.79	0.85	1.13	-0.07	0.27	-0.08	0.25	0.15	0.02	-0.7	0.21	-0.64	-0.55	0.28	-0.26	1.25	-0.19	-0.42	1.03	0.86	1.06	-0.91	1.15	-1	-0.96	-0.76	1.04	0.68	-0.33	-0.46	0.09	0.68	-0.12	0.21	-1.12	-0.19	0.17	0.27	0.27	0.36	1.47	1.34	1.03	0.9	1.23	0.64
RP0138	2.41	2.21	2.06	1.88	1.52	1.7	1.88	1.2	1.78	1.53	1	1.59	1.77	1.21	1.68	1.5	1.09	1.47	1.85	0.86	1.04	0.93	1.18	1	0.97	1.73	1	1	1	1.05	1.06	1.37	0.55	1	1	1.02	0.99	1.52	1	1	1	1.21	0.99	1.99	0.96	0.94	1.82	1.18	1.22
RP0139	1.68	1.89	1.17	0.83	-0.31	-0.02	1.96	0.87	0.97	1.65	0.53	0.83	2.09	1.2	1.15	1.28	0.4	0.65	1.6	0.5	0.44	0.51	0.42	0.76	0.93	0.49	1	1	-0.21	-0.69	0.76	1.08	1.09	1	0.8	0	1.02	0.5	1.01	1	0.7	-0.47	0.19	0.47	1.35	0.36	1.76	0.87	0.7
RP0140	1.77	2.69	2.87	2.11	2.36	2.52	0.65	1.97	1.66	0.88	1.27	1.27	1.76	2.76	2.46	1.59	1.93	1.84	1.82	1.15	1.21	0.14	0.8	0.65	0.98	1.07	1	1	-0.95	1.04	0.77	-0.19	0.89	1	-0.09	0.79	0.8	0.06	1.39	1	-0.12	0.62	0.66	1.93	1.22	0.97	-0.1	0.92	0.86
RP0141	2.41	1.87	1.98	2.02	1.85	1.82	0.76	1.4	1.23	0.8	1.24	1	2	1.91	2.28	1.81	1.99	1.46	1.43	0.94	1.11	0.58	0.94	1.03	-1.07	0.41	-1	-1	-1.01	0.88	0.77	0.46	0.38	0.46	0.85	0.11	0.15	0.49	0.18	-0.07	0.16	0.67	0.92	1.32	1.56	0.42	1.19	1.13	0.72
RP0142	1.54	1.3	1.25	1.01	-0.5	0.12	0.97	0.88	1.03	0.73	0.55	0.68	0.56	0.35	0.77	-0.1	-0.16	-0.14	0.45	0.38	0.05	-0.94	0.78	0.82	-0.8	-0.6	-1	-0.96	-0.99	0.23	0.78	0.06	0.27	0.43	0.69	-0.05	0.22	-0.57	0	-0.02	0.1	0.37	-0.93	0.03	1.38	-0.96	2.04	-1.15	0.73
RP0143	1.77	2.03	1.66	1.3	1.44	1.2	1.18	0.59	0.75	0.32	0.39	0.53	0.81	0.35	0.18	0.22	0.32	0.25	1.91	0.34	0.68	0.88	0.92	0.98	1.01	1.73	1	1	1	1.05	1.07	1.2	0.55	1	1	0.39	1	0.32	1	1	1	0.13	1	1.88	0.81	0.87	0.97	1.14	1.03
RP0144	0.97	0.48	0.82	-0.22	-1.11	-0.85	0.12	-0.56	-0.25	-1.02	-0.99	-1.23	1.03	0.33	0.35	-0.32	-0.27	-0.64	0.25	-1.37	-0.5	-1.51	-1.8	-1.38	-1.07	-1.39	-0.85	-0.94	-1.01	-0.63	-1.57	-1.48	-0.54	-1.31	-1.04	-1.25	-0.82	-1.59	-0.79	-0.48	-0.91	-1.35	-1.35	-0.49	0.63	-0.88	-1.03	-0.37	-1.69
RP0145	1.91	3.73	3.72	2.59	3.25	3.42	1.7	3.27	2.85	0.98	2.5	1.96	2.69	3.75	3.95	1.64	2.78	2.38	1.96	0.49	0.6	0.93	0.47	0.8	1	0.47	1	1	-0.61	0.19	0.72	1.02	0.72	1	0.6	0.3	1.02	0.97	0.22	1	0.8	0.09	1.02	1.3	1.64	0.94	1.04	0.96	0.77
RP0146	1.41	0.88	0.34	1	0.63	0.88	0.18	0.07	-0.14	0.42	-0.23	-0.18	0.26	0.03	-0.2	0.57	-0.37	-0.22	1.01	0.17	0.27	-0.91	-0.11	-0.31	-0.76	0.8	-1	-1	-1.03	0.79	0.34	0.47	-0.22	0.19	0.24	-0.03	-0.06	0.52	-0.22	-0.35	-0.58	0.11	-0.5	1.11	1.02	-0.65	-0.92	0.69	0
RP0147	0.79	1.36	1.88	1	0.43	1.37	-0.36	1.02	0.68	0.03	0.35	0.54	-0.27	1.17	0.67	0.01	0.49	0.47	0.76	-0.02	0.13	-0.51	-0.16	-0.07	-0.93	0.39	-1	-1	-0.19	-0.02	-0.36	0.73	-0.71	-0.22	-0.89	0.43	0.23	1.05	-0.7	-0.13	-0.04	0.15	-0.79	0.83	1.14	-0.69	-0.77	-0.18	0.06
RP0148	2.29	2.27	1.81	1.58	1.31	1.27	0.49	1.01	0.91	0.8	1.08	1.24	0.51	1.26	1.05	1.09	1.31	1.08	1.61	0.6	0.97	-0.15	0.15	0.27	0.72	1	1	1	-1.08	0.22	0.52	0.99	0.86	1	0.18	0.26	0.72	1.67	1.12	1	-0.51	0.31	-0.01	1.19	1.64	0.28	-0.22	1.23	0.56
RP0149	0.92	1.55	0.06	0.85	0.94	0.1	0.79	0.47	0.61	0.91	0.47	0.68	0.13	0.47	0.43	0.68	0.01	0.1	1.52	0.72	0.41	-0.02	0.62	0.23	0.99	0.38	1	1	0.15	-0.31	1.08	1.04	0.95	1	1.2	0.19	1.04	0.78	1.17	1	0.74	0.27	0.68	1.05	1.25	1	1.05	0.12	0.85
RP0150	-1.4	0.3	-1.14	-1.16	0.56	0.02	0.99	1.17	0.94	1.23	1.36	1.45	-0.14	1.08	0.32	0.5	1.21	0.97	1.55	1.72	1.4	0.97	0.79	0.81	1.01	0.47	1	1	-0.29	0.19	1.03	1.03	1.19	1	1	1.29	1.03	0.99	1.13	1	0.9	1.03	1.03	1.38	1.29	1	0.65	1.61	1.22
RP0151	1.66	1.98	1.45	0.58	0.57	0.39	0.23	0.65	0.77	-0.29	0.16	-0.23	1.48	1.36	1.55	1.29	0.63	0.55	1.45	0.4	0.67	0.29	0	0.01	1	0.1	1	1	-0.7	-0.19	0.47	0.49	0.83	1	-0.41	0.19	0.76	0.57	0.93	1	-0.41	0.36	0.78	1.15	1.25	0.92	0.92	0.69	0.49
RP0152	1.48	2.12	3	1.56	1.42	2.13	-0.34	0.63	0.56	0.42	0.35	0.51	-0.6	1.46	1.12	0.75	0.76	0.76	1.38	-0.16	-0.03	-0.31	-0.24	-0.27	0.98	0.17	1	1	-0.39	-0.59	0.56	0.91	0.68	1	-0.02	-0.15	0.91	0.61	0.8	1	-0.23	-0.22	0.47	0.53	1.25	0.71	1.07	-0.16	0.35
RP0153	0.48	0.71	0.9	0.14	0.93	1.03	1	0.91	1.38	0.81	1.25	1.62	0.37	0.79	1.14	0.56	1.21	1.36	1.45	1.31	1.26	0.93	0.62	0.76	0.99	0.1	1	1	-0.89	-0.06	0.33	0.33	0.8	1	-0.82	0.93	0.84	0.69	1.08	1	-0.13	0.73	0.94	1.06	1.64	0.94	1.07	0.8	0.82
RP0154	1.42	0.91	0.06	1.05	1.4	1.32	0.81	0.56	1.1	0.64	0.74	0.97	0.74	1.06	1.19	1.1	1.22	1.41	1.88	0.67	1	0.29	0.44	0.64	1	0.51	1	1	-0.77	0.33	0.78	0.73	1.15	1	0.42	0.35	1	0.77	1.28	1	0.43	0.39	0.79	1.32	1.25	0.92	0.02	0.71	0.75
RP0155	1.65	0.4	0.85	1.88	0.99	2.01	2.13	1.06	1.5	1.97	0.97	1.37	2.06	0.86	1.53	2	0.81	1.28	1.83	1.41	0.88	1.02	1.08	0.91	1	1.21	1	1	-0.96	1.01	1.02	0.62	1	1	0.78	1.05	0.99	-0.1	0.49	1	1.16	0.29	1.15	2.08	1.34	1.02	1.16	1.92	1.2
RP0156	2.02	2.08	1.78	0.94	1.03	1.33	0.11	1.13	0.56	-0.01	0.69	0.46	0.73	2.4	1.46	0.26	1.26	1.03	0.17	-0.08	-0.04	0.05	0.26	0.33	-1.09	-0.73	-1	-1	-0.88	-0.14	0.3	-0.08	-0.48	0.2	-0.03	-0.25	-0.21	-0.54	-0.6	-0.59	-0.32	0.22	-0.64	0.25	0.93	-0.48	-0.19	0.22	0.38
RP0157	2.11	1.23	1.1	0.78	0.78	0.57	0.58	0.97	0.71	0.64	0.99	0.91	0.72	0.67	0.36	0.41	0.65	0.47	1.92	1.4	1.06	1.03	1.11	1.06	1.01	0.67	1.02	1	0.33	-0.02	1.1	1.13	1.12	1	1.12	0.93	1.04	0.33	1.03	1	1.04	0.25	1.15	1.33	1.49	1.01	1.44	0.9	1.13
RP0158	1.64	0.39	0.89	1.8	0.26	0.26	0.51	-0.49	-0.91	0.84	-0.6	-0.36	1.83	-0.31	0	1.32	-0.49	-0.27	-0.55	-1.08	-1.11	-0.65	-1.14	-0.49	-1	-1.77	-1	-1	-1.06	-1.18	-0.47	-0.72	-0.39	-0.42	-0.49	-1.61	0.01	-1.25	0.02	-0.21	-0.31	-1.93	-0.35	-1.07	1.07	-0.8	-0.48	-1.49	-1.05
RP0159	0.37	0.16	-0.07	-0.69	0.48	0.17	0.78	0.66	0.47	0.07	-0.03	0.15	0.81	0.4	0.11	-0.24	-0.05	-0.11	-0.95	-0.4	-0.72	-1.02	-0.3	-0.2	-0.99	-1.24	-1	-1	-0.7	-0.95	-0.62	-0.26	-0.3	-0.04	-1.14	-0.35	0.09	-0.67	-0.28	0.09	-0.49	-0.91	-1.47	-0.93	0.92	-1.26	-1.22	-0.4	-0.16
RP0160	1.35	0.95	0.1	0.33	0.44	0.42	1.71	0.91	0.98	0.19	0.57	0.38	1.79	1.15	1.19	0.36	0.67	0.58	0.06	-0.34	-0.35	-0.53	-0.65	-0.37	-1.22	-1.5	-0.62	-0.92	-0.97	-1.06	-1.3	-1.16	-0.26	-0.29	-1.25	-1.15	-0.56	-1.23	-0.5	-0.16	-0.93	-1.31	-1.11	-0.61	1.02	-0.42	1.38	-0.9	-0.88
RP0161	0.61	-0.45	-0.08	0.26	-0.24	0	1.09	-0.41	0.6	0.26	0.45	0.4	0.7	-0.45	0.34	0.56	0.3	0.52	0.82	0.56	0.54	0.95	0.81	0.96	0.94	0.95	-0.54	1	1	-0.8	0.93	1.37	1.18	1	1	0.72	0.91	1.2	0.68	1	1	0.31	0.98	1.48	0.11	0.98	1	-0.62	0.9
RP0162	1.58	2.71	1.46	0.59	2.15	1.03	1.1	1.59	1.14	0.83	1.4	1.24	1.28	1.82	0.89	0.71	1.37	0.84	1.7	1.13	1.02	1.13	0.89	1.32	0.99	-0.26	1.02	1	-0.74	-0.62	0.98	0.54	0.94	1	0.67	-0.47	0.97	-0.29	1.17	1	0.23	-0.52	1.33	0.55	1.67	1.01	1.64	0.7	0.87
RP0163	0.55	0.79	1.36	0.96	1.15	1.55	0.76	0.93	1.18	1.22	1.23	1.73	0.56	0.86	0.95	1.44	1.26	1.66	1.5	1.07	1.2	0.93	0.94	0.89	1	0.15	1	1	-0.98	-0.15	0.68	-0.12	0.86	1	-0.51	0.94	0.78	0.06	1.33	1	-0.19	0.89	0.97	1.35	1.64	0.95	1.14	0.77	1.02
RP0164	1.94	1.94	1.95	0.38	0.09	0.19	1.61	1.08	1.38	1.22	0.56	1	1.23	1.15	1.56	1.25	0.31	0.81	0.81	0.53	0.8	0.4	0.12	0.3	0.96	-0.43	1	1	-1.02	-0.83	0.46	-0.06	0.91	1	-0.16	-0.55	0.77	-0.19	1.3	1	-0.49	-0.49	1.04	0.38	1.35	0.93	1.12	0.01	0.36
RP0165	0.62	-0.21	-0.48	0.65	-0.47	0.1	-0.4	-0.2	-0.2	-0.15	-0.5	-0.08	-0.09	0.23	0.26	0.33	-0.19	0.58	0.78	-1.2	-0.26	-0.43	0.22	-0.02	-0.92	-0.27	-0.99	-1	-0.87	-0.55	-0.29	-0.85	-1.39	0.08	-1.09	-0.78	-0.13	-0.54	-0.79	-0.33	-0.62	-0.53	-0.72	0.11	1.15	-0.57	-0.76	-0.79	-0.09
RP0166	1.92	2.61	2.64	1.2	2.26	2.13	0.55	1.28	1.73	-0.54	0.44	0.14	1.27	1.41	2.01	0.19	0.94	0.73	1.45	-0.33	0.14	-0.99	-0.43	-0.55	-0.98	-0.28	1	-0.78	-0.88	-0.35	0.13	0.64	0.35	0.55	-0.19	-0.09	-0.15	0.45	0.96	0.19	-0.73	-0.05	-0.71	0.17	1.22	-0.3	0.97	-0.06	-0.25
RP0167	2.32	2.33	1.4	1.52	3.09	2.4	1.61	1.84	2.01	1.54	1.52	1.76	1.73	1.69	1.69	1.47	1.79	1.84	1.8	1.31	1.14	0.95	0.85	0.93	1	1.11	1	1	-0.94	0.98	0.77	0.53	1.03	1	-0.21	1.17	0.9	1.18	1.33	1	-0.14	1	1.03	1.93	1.3	0.97	1.06	1.23	1.05
RP0168	2.17	0.17	0.78	1.3	-0.24	0.47	1.77	0.34	1.07	1.03	0.42	0.65	1.61	0.22	0.86	1.12	0.11	0.22	1.41	1.03	0.76	0.98	0.8	0.88	1	0.03	1	1	0.08	-0.55	0.75	0.81	1	1	0.05	0.84	1.01	0.63	1	1	0.58	0.51	1	1.1	1.28	1.02	1.2	0.63	1.06
RP0169	2.07	1.67	1.74	1.51	1.09	1.25	2.96	1.02	2.2	1.55	0.53	1.13	1.97	1.08	1.5	1.22	0.38	0.95	1.33	0.04	0.11	0.98	0.9	0.98	1.04	0	1	1	1	-1	1.12	0.84	0.55	1	1	-0.43	1.01	-0.47	1	1	1	-1.42	1.09	1.49	1.01	1.02	2.12	0.69	1.02
RP0170	2.26	1.87	1.54	1.81	2.02	1.85	0.34	-0.43	-0.15	0.38	-0.39	0.33	0.55	0.24	0.25	0.79	0.18	0.46	2.05	-0.11	0.29	1	1.2	0.89	0.93	1.97	1	1	-1	1.03	0.33	-1.42	-1.07	1	-1.44	0.08	0.43	-0.9	-0.87	1	-0.53	0.19	0.85	3.01	1.26	1.04	1.59	1.04	0.67
RP0171	0.54	0.04	-0.07	-0.23	-0.24	-0.16	0.26	-0.55	-0.14	0.03	-0.65	-0.09	0.27	-0.32	-0.14	0.03	-0.58	-0.47	0.82	-0.14	-0.4	1.03	0.97	0.78	-0.06	-1.06	-1	1	-0.89	-1	-0.41	-1.9	-1	1	-1.05	-1	-0.49	-0.9	-1	1	-0.96	-1	-0.2	-0.07	2.03	1.04	0.14	0.32	-0.02
RP0172	1.49	0.34	0.15	0.4	0.09	0.3	0.4	1.03	0.96	0.97	1.11	1.37	-0.68	0.31	-0.61	-0.55	-0.07	-0.14	0.44	0.49	-1.03	0.9	0.48	0.63	0.96	-0.75	-1	1	-0.14	-1.03	-0.08	-0.42	0.55	1	-1	-0.24	0.72	-0.76	0.13	1	-0.5	-0.97	0.75	0.5	1.49	0.92	0.55	-0.06	0.63
RP0173	1.56	0.01	0.3	0.64	-0.36	0.21	1.49	-1.37	0.2	0.6	-1.39	-0.3	1.5	-0.87	0.28	0.82	-1.01	-0.34	0.35	-1.09	-1.11	0.94	0.59	0.67	-0.11	-1	-0.88	1	-0.33	-1	-0.53	-1.5	-1.74	1	-1.12	-1	-0.59	-1.1	-1.68	1	-0.23	-1	-0.25	0.23	1.5	0.95	0.3	0.17	-0.29
RP0174	2.45	2.76	1.94	1.67	2.3	1.18	0.65	1.2	0.98	0.66	0.83	0.65	0.61	2.45	1.46	1.15	1.44	0.98	1.85	0.22	0.69	-0.56	0.21	-0.04	-0.74	0.83	-1	-1	-1.01	0.79	0.37	0.52	0.13	0.3	0.16	0.21	-0.03	0.73	0.07	-0.33	-0.55	0.38	0.3	1.69	1.17	-0.37	1.16	0.9	0.37
RP0175	1.6	1.78	1.29	0.84	1.7	1.38	0.81	0.86	0.65	0.51	0.36	0.39	0.18	1.18	0.81	1.33	1.1	1.14	2.09	0.03	1.19	1.15	0.48	0.79	-0.77	0.86	-1	-1	-1.04	0.65	0.58	0.21	0.15	0.85	-0.02	-0.11	0.43	0.54	0.77	0.48	-0.45	0.48	1.87	1.99	1.89	0.82	1.69	1.16	0.49
RP0176	1.68	2.32	2.09	0.6	1.85	0.97	0.96	0.94	1.1	1.24	1.49	1.51	0.68	0.89	0.73	1.84	1.97	1.95	1.75	1.37	1.48	1.02	0.78	0.96	0.97	1.15	1	1	-0.39	0.78	0.9	1.04	1.19	1	0.8	1.01	0.99	1.71	1.25	1	0.43	0.79	1.19	1.59	1.42	0.97	1.3	1.28	0.96
RP0177	1.81	2.28	1.36	0.97	3.14	2.15	0.77	0.9	1.03	0.53	0.9	0.76	1.16	1.14	0.7	0.8	1.34	0.79	1.31	0.35	0.47	-0.36	0.48	0.31	-0.84	0.66	-1	-1	-0.96	0.76	0.57	0.68	0.2	0.29	0.61	0.37	0.14	0.96	-0.1	-0.33	0.13	0.68	0.14	1.33	1.13	-0.13	0.84	0.98	0.53
RP0178	0.7	1.82	1.19	1.03	1.78	1.36	0.29	1.18	0.84	-0.17	0.41	0.08	0.62	1.72	1.69	0.53	0.85	0.7	1.53	-0.03	0.37	0.52	0.49	0.71	0.99	0.85	1	1	0.85	-0.33	0.97	0.96	0.78	1	0.92	-0.24	1.03	0.47	1.23	1	0.64	-0.08	0.89	1.28	1.34	0.99	1.34	0.45	0.73
RP0179	1.2	2.18	1.44	0.22	1.53	1.05	0.77	0.76	1.27	0.91	0.91	1.21	0.52	1.34	1.66	0.05	1.15	1.22	1.14	0.8	0.9	0.98	0.8	0.93	-1.18	-1.83	1	-0.29	-0.78	-0.62	0.5	0.22	1	0.35	0.66	0.8	0.02	-0.42	1.4	0.36	0.3	0.51	-0.37	-0.38	1.67	0.97	0.99	0.59	0.72
RP0180	1.1	1.15	1.02	-0.3	0.27	0.46	0.53	-0.41	0.03	0.21	-0.6	-0.59	1.02	0.57	0.84	0.93	0.23	0.18	0.13	-0.99	-0.38	0.81	0.23	0.72	-1.12	-2.15	-1	-0.99	-0.99	-0.99	-0.51	-1.28	-0.7	-0.8	-0.85	-0.45	-0.88	-1.73	-0.86	-1.05	-0.88	-0.66	0.2	-0.55	1.23	-0.06	1.44	0.23	-0.17
RP0181	1.71	1.59	1.29	0.37	1.72	1.04	1.4	1.63	1.73	0.87	1.33	1.04	1.24	1.77	1.75	0.78	1.41	0.87	1.53	1.02	0.9	0.99	0.93	0.92	1	0.29	1	1	0.42	-0.42	0.94	1.01	1.05	1	0.83	0.73	1.04	0.58	1.26	1	0.97	0.51	1	1.29	1.27	1.02	1.27	0.67	1.15
RP0182	1.35	1.01	0.28	0.98	0.52	0.74	1.03	1.17	1.25	1.58	1.2	1.67	0.27	0.95	0.72	1.57	1.34	1.45	1.54	0.94	1.26	-0.06	-0.09	-0.09	0.95	0.38	1	1	-0.68	-0.12	-0.07	0.51	0.78	1	-0.83	0.21	0.7	1.28	1.01	1	-0.55	0.37	0.57	0.96	1.26	0.77	-0.38	0.44	0.37
RP0183	3.22	0.41	0.82	1.25	-0.03	0.58	2.22	-0.44	0.57	0.77	-0.29	0.26	3.02	0.01	1.09	0.67	-0.35	0.2	0.9	0.2	0.61	0.3	0.27	0.22	0.99	-0.57	1	1	-0.9	-0.88	0.5	0.14	0.49	1	-0.25	-0.22	0.86	0.2	1.28	1	-0.15	0.01	0.95	0.24	1.31	0.98	0.98	-0.11	0.49
RP0184	1.67	3.02	2.24	0.63	2.06	0.97	1.45	1.94	1.75	0.57	1.48	1.25	1.41	2.74	2.33	0.85	1.82	1.52	1.47	0.98	1.06	0.91	0.28	0.55	1	0.12	1	1	-0.99	-0.5	0.47	-0.02	0.65	1	-0.42	0.25	0.9	-0.1	0.78	1	0.1	0.11	0.98	1.46	1.66	0.91	1.33	1.21	0.7
RP0185	1.66	0.9	2.03	0.12	1.43	1.93	1.89	1.63	1.87	1.75	1.79	1.77	1.16	1.53	2.16	1.06	1.54	1.56	1.8	2.25	1.53	1.03	0.77	0.89	1	1.01	1	1	-0.74	0.99	1.05	0.97	1.01	1	0.98	1.46	0.96	1.67	1.19	1	0.39	1.32	1.18	1.05	1.61	1.01	0.89	1.26	1.22
RP0186	1.2	1.07	1.05	1.18	1.43	1.09	0.99	0.86	1.05	1.09	0.91	1.08	0.83	0.59	1.01	0.89	0.85	0.88	1.95	0.97	0.94	0.12	0.84	0.59	-0.99	-1	-1	-0.98	-1	0.74	0.9	0.72	0.68	0.67	0.94	0.68	0.01	0.65	0.04	-0.35	-0.21	0.81	0.73	2.36	1.43	0.72	1.81	1.08	0.87
RP0187	2.2	2.66	2.04	1.51	3.31	2.97	0.74	1	1.11	0.41	0.71	0.68	1.71	1.48	1.83	1.39	1.46	1.61	1.37	0.33	0.76	-0.23	0.64	0.5	-1.17	0.27	-1	-1	-1.01	0.88	0.65	0.39	0.32	0.53	0.41	0.27	0.21	0.6	0.41	-0.02	-0.15	0.7	0.05	1.18	1.11	-0.39	1.11	0.98	0.65
RP0188	1.47	1.94	1.13	0.25	1.03	0.67	1.57	1.58	1.53	0.91	1.04	1.05	1.05	1.49	0.77	-0.02	0.29	0.19	1.04	0.17	-1.25	-0.46	-0.22	-0.48	-0.96	0.4	-0.94	-1	0.25	-0.88	0.42	0.52	-1.35	-0.18	0.84	-1.04	-0.05	-0.18	-1.39	-0.58	0.54	-0.99	-0.09	0.43	1.57	-0.24	1.04	-1.32	0.16
RP0189	1.17	1.22	0.98	-0.43	-0.4	0.32	0.63	0.36	0.83	-0.06	-0.11	0.02	-0.28	0.22	0.82	-0.05	-0.14	0.13	-0.75	-0.72	-0.86	-1.06	-0.91	-1.16	-1.17	-1.46	-1	-0.99	-1.03	-0.69	-0.42	-0.26	-0.63	-0.57	-0.34	-0.87	-0.93	-0.7	-1.38	-1.12	-0.81	-0.49	-0.74	-0.74	0.98	-1.06	-1	0.09	-0.7
RP0190	1.36	1.82	1.22	1.8	1.68	2.21	1.37	1.56	1.46	1.58	1.47	1.7	0.76	1.68	1.39	1.59	1.32	1.51	1.53	1.64	1.26	0.42	1.18	0.99	1.01	0.17	1	1	-0.75	0.03	1.13	1.02	1.13	1	1.14	1.29	1.04	1.45	1.22	1	1.16	1.17	0.84	1.17	1.48	1.03	0.83	0.51	1.17
RP0191	2.06	0.07	1.15	1.37	0.39	1.78	1.08	-0.21	0.64	0.81	0.02	0.55	1.02	-0.48	0.58	0.41	-0.31	0.49	1.06	0.4	-0.07	0.2	0.62	0.53	0.96	-0.65	1	1	-0.74	-0.84	0.75	0.17	0.53	1	0.08	0.22	0.72	-0.45	0.77	1	-0.08	-0.09	0.62	0.34	1.24	0.92	0.95	0.06	0.72
RP0192	1.75	2.03	1.37	1.15	1.68	1.23	2.12	1.57	1.74	1.87	1.68	1.86	1.47	1.04	0.86	0.67	1.09	0.93	2.16	2.19	1.38	0.97	0.99	0.93	0.97	1.73	1	1	1	1.05	1.17	1.24	1.18	1	1	1.31	1	1.27	1.13	1	1	1.35	0.98	2.3	1.07	0.99	1.91	1.13	1.36
RP0193	2.05	1.31	-0.09	1.05	2.01	1.15	1.53	1.92	1.57	1.64	2.07	1.82	1.22	1.78	1.03	1.16	2.12	1.45	1.81	1.83	1.55	1	0.92	0.92	1	1.07	1	1	-0.29	1.04	1.06	1.03	1.04	1	1	1.14	1.03	1.11	1.2	1	0.94	1.13	1.06	1.85	1.32	1.01	0.79	1.18	1.24
RP0194	1.12	1.77	0.84	1.52	2.22	1.39	0.8	1.03	1.04	0.59	1.05	1.03	1.02	1.3	1.15	0.68	1.26	0.89	1.91	1.17	1.17	0.58	0.97	1.06	1	1.04	1	1	-0.64	0.97	1.08	0.83	1.1	1	1.07	0.39	1.01	0.71	1.13	1	0.69	0.72	0.99	1.65	1.4	1.03	1.06	1.1	0.98
RP0195	1.48	1.33	1.57	-0.76	0.49	-0.07	-0.05	0.92	0.74	-0.04	-0.11	-0.07	0	1.43	1.79	-0.22	0.43	0.23	0.92	-0.27	0.05	0.18	0.18	0.24	-0.86	-0.15	-1	-1	-0.98	0.02	-0.19	-0.26	-0.56	-0.2	-0.57	-0.13	-0.09	-0.16	-0.44	-0.48	-0.23	0.09	0.12	0.78	1.24	-0.13	0.98	0.91	0.04
RP0196	2.01	2.08	2.13	1.5	1.08	1.28	2.07	2.36	2.91	1.98	1.78	2.32	1.47	2.41	2.23	1.6	1.81	1.81	1.8	1.29	1.18	0.95	0.59	0.83	1.01	1.26	-0.83	1	0.3	0.38	0.62	1.16	0.59	1	0.3	0.94	1	2.1	0	1	0.52	0.75	1.01	1.82	1.24	0.98	1.51	0.07	0.91
RP0197	1.19	1.48	1.29	0.3	-0.07	-0.51	0.84	0.03	0.37	0.45	-0.46	0.11	0.48	0.54	0.46	-0.39	-0.76	-0.49	0.57	-0.33	-0.15	-0.08	0.1	-0.09	-0.87	0.26	-1	-0.99	-0.8	0.76	0.03	0.09	-0.39	-0.39	-0.07	0.29	-0.51	-0.01	-0.92	-0.95	-0.25	0.56	-0.22	0.36	1.08	-0.78	1.02	0.95	0.19
RP0198	-0.29	0.29	-0.91	-1.08	-0.52	-0.62	-0.59	-0.59	-0.89	-0.44	-0.7	-0.75	0.2	0	-0.32	0.15	-0.07	-0.08	-0.3	-0.29	0.31	0.82	0.42	0.58	-0.93	-1.35	-1	-1	-0.83	-0.36	-0.16	-0.43	-0.57	0.07	-1.08	0.38	-0.1	-0.53	0.35	-0.25	-0.63	0.54	-0.4	-0.83	0.81	-0.9	0.35	1.07	0.24
RP0199	0.79	0.35	0.49	-0.49	-0.17	0.37	1.87	0.52	1.58	2	0.79	1.41	1.44	0.65	1.92	1.81	0.65	1.63	0.87	0.93	1.31	-0.37	0.15	0.17	-0.92	0.59	-1	-1	-1.06	0.55	0.2	0.43	0.18	0.26	-0.1	0.73	-0.12	0.91	0.15	-0.25	-0.75	0.53	-0.04	1.12	1.14	-0.57	-0.02	0.79	0.2
RP0200	2.08	2.2	2.05	1.81	3.55	3.27	2.57	1.06	1.56	1.49	0.95	1.24	2.82	1.49	1.43	1.22	1.53	1.42	1.09	0.88	0.99	-0.77	0.31	-0.01	-0.84	0.34	-1	-1	-0.99	0.87	0.63	0.61	0.92	0.89	0.07	0.59	0.79	0.9	1.32	0.75	0.29	0.76	-0.42	1.06	1.1	-0.7	0.89	0.82	0.7
RP0201	1.89	2.06	1.98	2.15	1.55	1.92	1.15	1.34	1.34	1.14	1.09	1.23	1.19	1.77	1.61	1.55	1.41	1.61	1.34	0.82	0.78	1.06	1.55	1.41	1.04	-0.08	1	1	1	-1	1.12	0.64	0.49	1	1	-1.17	0.98	-0.49	0.33	1	1	-0.9	0.87	0.76	1.1	0.98	0.99	0.71	1.03
RP0202	0.6	-0.05	-0.79	-1.57	-0.64	-1.02	0.77	0.87	0.91	0.66	0.64	1.02	-0.32	-0.23	-0.88	-1.17	-0.46	-0.64	0.68	1.18	-0.1	0.87	0.6	0.64	1	-0.88	1	1	-0.6	-0.97	0.03	-0.39	0.97	1	-1	0.29	0.81	-0.59	1.05	1	-0.45	-0.39	0.78	0.44	1.52	0.87	0.31	0.51	0.75
RP0203	1.75	2.31	1.19	1.46	2.46	3.11	1.59	1.25	1.34	1.49	1.28	1.51	2	1.2	1.35	1.74	1.63	1.83	2.59	1.03	1.36	-0.34	0.75	0.45	-0.8	0.71	-1	-1	-1	0.71	0.87	0.64	0.46	0.71	0.77	0.82	0.34	1.28	0.7	0.25	-0.54	0.92	0.17	2.5	1.29	-0.55	1.69	0.93	0.78
RP0204	2.27	-0.37	1.57	1.3	-0.28	1.17	3.36	0.3	1.99	2.39	1.05	1.99	3.16	0.28	2.05	1.98	0.73	1.67	1.51	1.4	1.27	0.93	0.91	0.9	0.97	0.27	1	1	-0.2	-0.21	0.87	0.98	1.14	1	0.63	0.99	1.02	0.8	1.18	1	0.74	0.78	0.87	0.42	1.64	0.94	1.26	0.7	1.11
RP0205	0.2	-0.57	-1.31	-0.63	-0.59	-0.62	0.28	-0.47	-0.15	-0.18	-0.04	-0.09	0.05	-1.11	-0.64	-0.68	-0.68	-0.87	-0.29	0.12	-0.27	-0.07	0.36	0.59	-0.92	-0.48	-1	-1	-0.03	-0.96	0.74	0.78	0.63	0.5	0.9	-0.23	0.51	0.02	0.92	0.23	0.45	-0.79	0.01	0	1.27	-0.3	1.16	0.18	0.47
RP0206	1.26	1.17	0.56	0.7	0.33	0.53	0.39	0.77	0.75	0.45	0.73	0.67	0.57	1.02	0.97	0.77	0.98	0.98	1.36	0.26	0.71	-0.74	0.4	0.01	-0.86	-1	-1	-0.96	-1	0.93	0.42	-0.07	0.02	0.41	-0.31	0.55	-0.05	-0.39	0.01	-0.21	-0.71	0.92	-0.63	1.61	0.89	-0.73	1.37	0.79	0.52
RP0207	1.8	3	2.16	1.45	2.98	3.01	1.45	1.62	1.71	0.24	0.95	0.62	2.33	2.43	2.62	1.2	1.95	1.5	0.73	-0.55	-0.25	-0.15	-0.1	0.02	-0.92	-0.84	-1	-1	-1.04	-0.81	-0.24	-0.45	-0.25	0.06	-0.77	-0.63	-0.02	-0.69	-0.34	-0.26	-0.39	-0.77	0.3	-0.45	1.29	-0.07	1.19	-0.65	-0.13
RP0208	0.73	0.5	0.56	1.02	0.55	-0.24	0.48	-0.13	0	0.63	0.19	0.53	0.4	-0.13	-0.52	0.78	0.03	0.01	1.25	0.67	0.67	0.09	0.54	0.54	-0.91	0.62	-1.01	-1	-0.57	0.91	0.49	1.09	0.08	0.06	0.94	1.09	0.48	1.5	0.32	0.13	1	0.87	-0.44	1.47	0.91	-0.58	0.94	0.77	0.61
RP0209	2.8	1.71	2.67	1.37	0.96	1.61	2.38	1.91	2.39	2.02	1.61	1.97	2.36	1.74	2.23	1.69	1.27	1.49	1.96	1.96	1.38	0.91	0.86	0.79	0.97	1.42	1	1	0.51	1.05	1.06	1.04	0.87	1	1.06	1.13	0.97	0.3	0.22	1	1	0.52	0.84	1.79	1.5	0.91	1.33	1.16	1.12
RP0210	0.74	1.21	0.77	0.08	1.36	-0.28	-0.18	-0.35	-1.25	0.13	-1.02	-0.71	0.51	-0.45	-1.03	0.19	-0.89	-0.96	0.03	-0.82	-0.72	-1.17	-1.08	-0.72	-0.86	0.04	-1	-1	-0.63	-0.86	-0.05	0.86	-0.27	0.38	-0.16	-0.74	0.56	0.49	-0.73	0.39	0.12	-1.08	-0.97	0.25	1.06	-0.73	1.15	-0.85	-0.4
RP0211	0.87	0.4	1.12	0.9	0.77	1.27	1.95	1.32	1.5	1.78	1.38	1.7	1.16	1.01	1.02	1.36	1.23	1.42	2.28	1.85	1.57	0.92	1.01	1.12	0.96	1.02	1	1	-0.99	0.79	1.06	0.98	1.14	1	1	1.42	1	1.64	1.35	1	0.56	1.13	0.81	0.9	1.83	0.77	1.23	1.11	1.04
RP0212	1.31	0.62	0.43	0.79	2.11	0.95	0.72	0.97	0.81	0.85	1.17	1.13	1.02	1.06	0.28	1.29	1.63	1.26	1.39	1.14	1.45	0.25	0.6	0.54	-0.96	0.49	-1	-1	-1.05	0.56	0.87	0.94	0.9	0.75	0.95	0.78	0.25	1.21	1.19	0.26	-0.02	0.95	1.11	1.26	1.52	0.25	1.23	1.12	0.68
RP0213	1.9	3.09	2.85	1.27	2.3	1.76	0.37	1.01	0.78	0.5	0.69	0.68	1.24	2.53	2.36	0.75	1.26	1.12	0.77	0.4	0.61	0.36	0.68	0.74	-0.98	0.2	-1	-0.99	-0.85	0.61	0.84	0.76	0.55	0.64	0.8	0.47	0.4	0.99	0.34	0.07	0.5	0.81	0.55	0.89	1.39	-0.09	1.03	1.11	0.8
RP0214	1.2	2.91	1.8	1.5	2.44	2.23	0.85	1.24	1.03	0.78	0.85	0.75	0.79	2.51	1.79	1.2	1.84	1.55	1.52	0.25	1.03	0.32	0.35	0.51	-1.02	0.25	-1	-1	-1.05	0.64	0.42	0.4	0.12	0.46	0.21	0.03	-0.44	0.52	0.53	-0.62	-0.48	0.48	1.19	1.2	1.54	0.32	1.33	1.12	0.34
RP0215	2.42	1.77	1.82	1.56	1.53	1.52	1.36	1.33	1.36	1.51	1.55	1.66	1.13	0.85	0.91	0.79	1.13	1.08	1.93	1.65	1.2	1.02	1.08	1.05	1.01	-0.27	1	1	-0.45	-0.57	1.03	0.67	1.22	1	0.79	0.99	1.03	0.06	0.87	1	0.92	0.26	1.16	0.59	1.51	1.02	1.57	0.7	1.12
RP0216	1.29	1.71	1.16	1.38	1.72	1.36	0.63	0.23	0.66	0.33	0.49	0.22	1.15	1.12	1.48	1.13	1.15	0.6	1.59	-0.04	0.64	0.21	0.26	0.39	-1.28	-0.41	1	-0.42	0.44	-0.39	0.4	0.51	0.87	0.32	0.8	0.1	0.05	0.31	1.17	0.29	0.48	0.21	-0.22	0.12	1.31	1.01	1.2	0.27	0.27
RP0217	0.69	-0.58	0.31	0.04	-1.43	-0.84	-0.09	-0.56	-0.24	-1.13	-1.04	-1.08	0.36	-0.58	0.47	-0.79	-1.24	-0.76	-1.15	-1.62	-1.85	-1.42	-0.67	-1.47	-1.18	-1.77	-1	-1	-0.83	-0.75	-0.68	-1.22	-1.33	-0.62	-1.02	-0.97	-0.89	-1.59	-0.88	-0.9	-0.66	-0.62	-1.42	0.09	1.04	-1.6	1.71	-1.53	-0.79
RP0218	2.22	1.43	0.91	1.59	1.08	0.71	1.25	-0.07	0.42	1.3	0.19	0.63	1.64	0.74	1.07	1.78	0.53	0.8	1.81	1.04	1.27	0.8	0.62	0.8	1.01	1.36	1	1	0.39	1.01	0.93	1.07	1.04	1	0.66	1.06	1.03	1.09	1.36	1	0.68	0.82	0.75	1.53	1.51	0.76	1.49	1.15	0.85
RP0219	2.19	2.24	2.17	1.85	0.81	1.2	2.83	0.98	1.6	2.19	0.88	1.54	2.96	1.44	1.65	1.87	0.91	1.41	1.83	1.15	1.51	0.17	0.4	0.61	0.98	0.65	1	1	-0.97	0.5	0.76	0.6	0.91	1	0.36	0.53	0.87	1.1	1.11	1	-0.06	0.66	0.67	1.29	1.28	0.79	1.02	0.77	0.65
RP0220	1.1	0.48	0.53	0.37	-0.01	0.3	0.3	-0.37	0.05	0.1	-0.31	0.1	0.23	-0.13	0.17	-0.01	-0.21	0.02	0.61	-0.5	-0.7	-2.26	-2.58	-1.98	-1.83	-0.87	-0.84	-0.79	-2.01	-1	-4.29	-1.65	-0.88	-2.26	-1.9	-1	-3.63	-1.2	-1.2	-1.55	-2.23	-1	-2.12	0.71	0.97	-1.32	1.9	-0.65	-1.37
RP0221	-0.37	1.61	0.39	-0.75	1.02	0.43	-0.39	2.1	0.69	-0.72	1.05	0.64	-0.75	1.97	0.69	-0.96	0.71	0.05	0.71	-1.14	-1.2	0.89	0.47	0.79	1	-0.33	-1.49	1	0.42	-1.1	0.74	0.73	-0.23	1	0.17	-0.77	1.02	-0.05	-0.77	1	0.65	-1.19	0.92	-0.16	-0.2	0.89	1.35	-0.89	0.8
RP0222	1.78	2.34	0.92	1.52	1.8	1.33	1.83	1.51	1.52	1.85	1.45	1.67	1.96	1.45	1.17	1.92	1.41	1.41	2.18	1.55	1.58	1.17	0.9	1.14	-1.21	0.04	-1	-1.02	-0.99	0.82	0.87	0.49	0.59	0.48	0.97	0.49	0.25	0.19	0.94	0.19	0.69	0.93	1.58	2.17	1.72	2.09	1.69	1.29	0.85
RP0223	0.55	-0.46	-0.11	-0.15	-0.8	-1.18	-0.82	-2.19	-2.02	-1.05	-1.96	-1.77	-0.82	-2.5	-1.97	-0.82	-2.08	-2.33	-0.77	-1.79	-1.8	-0.35	-2.2	-1.87	-1.21	-0.56	-1	-1	-1.22	-2.09	-0.86	0.35	-1.23	-1.2	0.03	-2.52	-1.05	-0.56	-0.7	-1.2	-1.16	-2.81	-1.5	-1.23	-0.97	-0.75	1.86	-2.3	-2.16
RP0224	0.21	2.24	1.62	-0.42	1.59	0.54	0.68	1.41	1.02	0.2	0.68	0.42	-0.34	1.09	0.56	0.34	0.69	0.12	0.33	-0.03	0.27	-0.26	-0.18	-0.45	-0.8	-0.04	-1	-1	-0.9	-0.33	0.38	0.36	0.32	0.38	0.12	-0.09	0.12	0.6	0.25	-0.16	-0.38	0.12	0.25	0.48	1.25	-0.16	1.04	0.57	0.13
RP0225	2.28	1.47	1.48	1.37	0.35	0.97	1.47	1.23	1.54	0.85	0.76	1.42	1.47	0.81	1.32	0.51	0.43	0.76	0.61	-0.03	-0.26	0.12	-0.22	0.08	1	-0.48	-0.88	1	-0.74	-1.18	0.17	0.41	0.35	1	-0.34	-0.8	0.88	0.03	-0.33	1	-0.11	-1.14	0.64	0.25	0.92	0.8	-0.27	-1.25	0.26
RP0226	1.06	-0.4	0.04	0.61	0.15	-0.48	0.7	0.58	0.43	0.75	0.54	0.57	0.33	-0.09	-0.18	-0.35	-0.18	-0.71	0.6	0.69	0.23	-0.02	0.34	0.15	-0.82	0.99	-1	-1	-0.48	0.68	0.56	0.95	0.04	0.08	0.85	0.88	0.29	0.86	-0.16	-0.2	0.52	0.5	0.09	1.02	1.49	-0.19	1.38	0.9	0.34
RP0227	2.04	1.78	1.4	1.68	2.61	2.71	0.85	0.64	0.85	0.34	0.81	0.75	1.78	1.21	1.47	1.57	1.59	1.37	1.54	0.33	0.75	-0.14	0.41	0.51	-1.1	0.29	-1	-1	-0.99	0.33	0.5	0.44	0.43	0.49	0.16	0.32	0.38	0.61	0.85	0.16	0.05	0.47	-0.21	1.46	1.09	-0.2	0.14	1.16	0.56
RP0228	1.12	0.62	0.6	-0.41	-0.05	-0.56	0.45	-1.2	-0.77	-0.11	-1.04	-0.67	0.59	-0.59	-0.09	-0.12	-0.39	-0.62	1.31	-0.16	0.02	-0.19	-0.81	-0.42	1.01	-0.22	1	1	-0.04	-1.09	-0.25	0.34	0.95	1	-0.86	-0.88	0.8	-0.47	1.31	1	-0.49	-1.45	0.91	-0.29	1.27	0.51	-0.15	-0.7	-0.22
RP0229	2.51	2.56	1.78	1.19	2.86	2.24	2.08	1.5	1.5	1.75	1.46	1.57	2.17	1.79	1.53	1.39	1.68	1.38	2.08	1.28	1.31	0.49	0.73	0.68	1	1	1	1	-0.84	0.97	0.9	0.64	1.07	1	0.53	0.94	0.97	0.88	1.22	1	0.46	0.88	0.82	1.47	1.38	0.9	1.06	1.1	0.92
RP0230	1.92	1	1	2.05	1.39	2.21	1.42	1.41	1.43	1.46	1.5	1.64	1.45	1.21	1.39	1.42	1.14	1.27	1.89	1.11	0.68	1.03	1.17	1.08	1.01	1.37	1	1	0.33	0.99	1.09	0.99	0.61	1	1.11	0.25	1	0	0.43	1	1.02	-0.16	1.13	1.85	2.04	1.01	1.35	1.27	1.1
RP0231	-0.56	2.02	0.44	-0.06	0.78	0.38	-0.39	0.83	0.08	-0.53	-0.49	-0.69	-0.29	1.29	0.76	0.01	0	-0.32	0.25	-1.17	-0.68	-0.15	-0.78	-0.48	-0.96	-0.86	-1	-1	-1.07	-0.82	-0.5	-0.03	-0.86	-0.49	-0.39	-1.13	-0.35	-0.27	-0.73	-0.72	-0.67	-0.88	0.43	-0.06	1.44	-0.09	1.38	-0.6	-0.82
RP0232	2.01	1.77	1.53	1.54	1.02	1.15	1.17	1.13	1.24	1.21	1.04	1.19	1.08	0.79	1.04	0.88	0.94	1.23	1.65	1.07	0.83	-0.21	0.61	0.21	-1.19	-1	-1	-1	-1	0.84	0.6	0.28	0.25	0.26	0.43	1.25	-0.42	-0.07	0.26	-0.66	-0.73	1.07	-0.04	2.15	1.19	0.42	1.61	0.98	0.7
RP0233	1.32	1.97	2.21	0.63	1.32	1.46	0.97	0.91	1.58	1.11	1.22	1.67	0.51	1.02	1.35	0.55	1.07	1.36	1.97	0.81	0.73	1.13	1.08	1.2	0.87	0.68	1	1	1	-0.84	1.1	1.19	1.15	1	1	0.65	0.97	0.18	1.13	1	1	-0.14	0.91	1.15	1.11	1.01	1.13	0.59	1.02
RP0234	1.87	1.07	1.38	0.62	0.47	0.47	0.67	0.97	0.61	0.17	1.05	0.63	1.1	1.02	0.98	0.36	1.06	0.79	1.01	0.08	0.15	0.56	0.16	0.64	0.9	0.44	1	1	1.3	-0.93	0.81	0.95	0.22	1	0.38	0.43	0.78	-0.16	0.84	1	0.5	0.06	0.36	0.38	1.66	0.44	0.47	0.03	0.35
RP0235	1.5	0.62	0.26	0.44	0.45	-0.1	1.68	1.15	1.26	1.22	1.59	1.71	1.45	0.8	0.95	0.96	0.93	1.02	1.32	1.61	1.14	0.96	0.73	0.75	0.97	0.45	1	1	1	-0.94	1.14	1.13	0.87	1	1	-0.08	1.01	-0.01	0.9	1	1	-0.47	1.02	1.3	1.41	0.99	1	0.79	1.24
RP0236	1.49	2.29	1.55	1.18	2.67	2	1.41	1.09	1.28	1.29	1.14	1.28	1.67	2.09	2.13	1.76	2.02	2.11	1.62	0.93	1.18	0.08	0.69	0.2	-1.1	0.16	-1	-0.99	-1	0.59	0.79	0.66	0.72	0.69	0.66	0.75	-0.05	1.05	0.09	-0.4	-0.5	0.8	0.59	1.53	1.55	0.27	1.45	1.03	0.79
RP0237	0.92	0.4	-0.07	0.19	0	-0.29	-0.09	-0.33	-1	-0.6	-0.35	-0.65	0.02	0.05	-0.87	-0.49	-0.19	-0.69	1.13	-0.78	-0.61	0.07	-0.4	-0.08	-0.99	-1.04	-1	-1	-0.95	-0.9	-0.85	-0.14	-1.44	-1.17	-0.41	-0.46	-0.5	-0.5	-1.26	-0.97	-0.21	-0.8	-0.18	-0.14	-0.57	-0.31	1.33	-0.29	-0.62
RP0238	0.98	1.15	0.31	1.13	1.7	1.48	0.74	1.02	1.01	0.69	1.27	1.35	0.34	1.11	0.72	0.4	1.15	1.07	1.85	1.44	1.23	0.95	1.03	0.94	1	0.75	1	1	0.7	-0.05	1.05	1.23	1.2	1	1.18	1.32	1.04	0.72	1.05	1	1.12	0.76	0.98	1.44	1.3	0.97	1.42	0.81	1.17
RP0239	0.86	1.5	0.91	-0.07	0.9	0.67	0.95	0.15	0.38	0.61	-0.12	0.13	1.88	1.19	1.17	0.55	0.52	0.54	0.86	0.07	0.69	-0.77	-0.14	-0.52	-0.9	0.17	-1	-0.99	-1.05	0.68	0.4	0.54	0.24	0.37	0.12	0.24	-0.11	0.96	0.42	-0.39	-0.56	0.73	-0.27	0.68	1	-1.05	0.42	0.76	0.18
RP0240	2.45	0.92	1.48	2.1	1.35	2.21	1.81	1.42	1.47	1.48	1.48	1.5	2.51	1.51	1.65	1.58	1.51	1.34	1.84	1.8	1.27	0.94	1.29	1.1	0.99	1.04	1	1	-0.23	1.05	1.09	1.24	1.22	1	1.15	1.84	1.04	2.21	1.19	1	1.19	1.27	0.94	2.27	1.27	0.97	0.59	1.06	1.3
RP0241	0.04	-0.05	-0.96	-1.04	-0.89	-1.43	1.52	1.07	0.71	0.81	0.54	0.34	0.38	0.06	-0.75	-0.36	-0.42	-0.9	-0.24	0.08	-0.98	1.01	0.65	1.1	-0.24	-0.52	-0.88	1	-0.14	-1	0.37	0.24	-1.15	1	0.46	-1	-0.31	-0.68	-0.81	1	0	-1	-0.54	0.25	1.42	0.94	1.91	-0.92	0.19
RP0242	2.07	2.36	2.4	1.67	2.12	1.71	0.47	0.83	0.65	0.08	0.31	0.24	0.67	1.8	1.58	0.26	0.79	0.4	1.6	0.33	0.59	0.41	0.5	0.41	-0.99	0.31	-1	-0.98	-1.01	0.72	0.67	0.42	0.36	0.45	0.53	0.25	0.12	0.25	0.25	-0.12	-0.22	0.7	0.78	1.77	1.61	1.22	1.33	1.1	0.6
RP0243	0.76	-0.49	-1.12	-0.72	-1.01	-0.84	-1.27	-0.65	-0.98	-1.27	-1.28	-0.74	-0.64	-0.99	-1.24	-1.29	-1.02	-1.05	0.33	-1.28	-1.26	-0.79	-2.24	-1.6	0.95	0.31	-1.18	1	-0.36	-1.15	-0.54	1.01	-0.58	1	-0.77	-1.3	0.69	0.87	-0.36	1	-0.67	-1.63	-0.18	0.46	-0.85	0.3	-0.87	-0.95	-0.85
RP0244	2.83	2.27	1.76	1.13	1.53	1.3	2.84	2.29	2.81	2.22	1.55	2.05	2.09	2.74	2.62	1.96	1.79	1.64	1.83	1.43	1.21	0.9	0.59	0.81	1.01	1.38	1	1	0.35	0.98	0.63	1.18	1.03	1	0.08	0.61	0.99	1.83	1.33	1	0.38	0.94	0.94	1.74	1.33	0.9	1.45	1.22	0.89
RP0245	0.7	-0.86	-0.33	0.29	-0.64	-0.11	1.35	0.23	0.87	0.94	0.26	0.54	0.89	-0.29	0.19	0.6	-0.25	-0.17	0.26	0.45	0.48	0.97	0.51	0.93	-0.93	-0.13	-1	-1	-0.19	-0.52	0.72	0.88	0.58	0.48	0.86	0.36	0.35	0.56	0.82	0.02	0.15	0.13	0.65	0.42	1.66	0.14	1.44	0.65	0.59
RP0246	0.76	-0.89	-2.12	0.79	-1.45	-0.76	0.45	-0.44	-0.51	0.87	0.19	0.51	0.75	-0.75	-0.99	1.63	-0.02	0.52	0.84	0.32	0.89	0.36	0.04	0.23	0.96	-0.4	1	1	-0.98	-0.85	0.68	0.47	0.33	1	0.27	-0.43	0.83	0.68	0.64	1	-0.23	0.01	0.95	-0.31	1.37	0.88	1.17	-0.08	0.31
RP0247	1.46	-0.37	0.27	0.45	0.39	0.84	1.23	0.56	0.99	1.04	0.75	1.08	0.7	0.48	0.96	0.71	0.82	0.84	1.64	1.02	0.99	0.44	0.81	0.77	0.99	0.64	1	1	0.02	-0.01	1.07	0.94	1.08	1	1.06	0.27	1.04	0.64	1.38	1	0.79	0.47	0.94	1.25	1.35	1.03	1.25	0.53	0.89
RP0248	1.14	1.63	0.84	1.38	1.16	1.21	0.62	0.41	0.47	1.07	0.46	0.95	0.39	1.13	0.91	1.07	1.18	1.48	1.54	0.57	0.92	0.99	1.08	1.17	0.99	0.38	1	1	-0.6	0.27	0.85	0.43	0.36	1	0.02	0.92	0.88	0.78	0.72	1	0.06	1.19	1.03	1.57	1.3	1	1	0.9	1.05
RP0249	1.31	1.42	0.58	2.06	1.65	1.26	1.34	1.32	1.17	0.74	1.36	0.97	1.33	1.72	0.94	1.72	2.08	1.63	1.59	0.89	1.52	1.2	0.47	1.06	0.9	0.55	1	1	-1.03	0.18	0.67	0.39	0.88	1	0.22	-0.09	0.65	0.42	1.08	1	-0.64	0.17	1.31	1.37	1.54	1.01	1.7	1.65	0.6
RP0250	1.77	0.92	0.81	1.35	0.75	1	0.89	0.44	0.68	1.1	0.68	0.88	0.67	-0.01	0.12	0.8	-0.21	-0.05	1.28	1.07	0.52	-0.94	0.41	-0.11	0.97	0.53	1	1	-0.9	0.22	1.04	0.91	1.12	1	1.03	0.21	1.03	0.54	1.18	1	0.74	0.26	-0.67	0.19	1.27	0.07	1.82	-0.52	0.84
RP0251	1.49	-0.59	-0.13	0.67	-0.93	-0.24	1.5	0.84	1.23	1.46	0.96	1.32	0.4	-0.55	-0.22	-0.04	-0.52	-0.41	1.11	1.14	-0.36	0.31	-0.16	0.15	0.97	-0.22	1	1	-0.75	-0.77	0.98	0.44	-0.57	1	0.96	-1.05	0.91	-0.55	-0.79	1	0.73	-0.9	0.06	-0.76	1.6	0.37	-0.22	0.36	0.9
RP0252	2.46	1.87	2.38	2.13	2.01	2.37	1.41	1.16	1.37	1.39	1.29	1.45	1.95	1.09	1.44	1.75	1.37	1.57	1.84	1.13	1.2	0.33	0.74	0.62	-0.84	0.16	-1	-0.99	-0.99	0.91	0.97	0.57	0.91	0.93	0.8	0.48	0.66	0.6	1.02	0.73	-0.24	0.9	0.67	1.73	1.41	0.09	1.3	1.07	0.98
RP0253	0.94	1.56	2.5	0.82	1.58	2.08	0.69	0.4	1.05	1	0.6	0.86	0.32	0.78	1.47	1.73	0.99	1.3	1.33	0.6	0.96	0.39	0.59	0.64	1	-0.11	1	1	-0.77	-0.34	0.73	0.53	0.65	1	0.03	0.5	0.99	0.75	1.02	1	0.28	0.57	0.92	0.22	1.33	1.03	0.85	0.32	0.84
RP0254	1.7	0.84	0.41	-0.28	0.18	0.24	1.3	0.42	0.9	-0.03	0.19	0.1	1.21	0.58	1.05	-0.17	0.28	0.11	0.66	0.08	-0.27	0.85	0.36	0.58	0.97	-0.99	-0.26	1	-0.68	-1.07	-0.44	-1.25	-0.26	1	-1.27	-0.57	0.31	-1.07	-0.32	1	-0.62	-0.77	0.71	0.33	1.21	0.85	0.33	-0.1	0
RP0255	2.02	0.87	2.26	0.97	0.83	2	1.34	1.19	1.55	0.79	1.17	1.26	1.55	1.23	2.24	0.99	1.18	1.59	1.02	-0.15	-0.3	0.95	0.46	0.81	1	-0.41	1	1	-0.05	-0.96	0.74	0.21	0.22	1	-0.03	-0.03	0.84	-0.53	0.84	1	0.43	-0.44	0.98	0.48	1.3	0.97	1.25	0.45	0.56
RP0256	1.07	0.26	0.28	0.3	0.63	0.77	1.29	0.93	1.53	1.31	1.04	1.47	0.49	0.16	0.64	0.74	0.64	1	1.29	1.13	0.92	1.02	1.18	1.1	0.94	0.59	1	1	1	-0.87	1.13	1.18	1.15	1	1	0.86	1	0.13	1.13	1	1	0	1	1.19	1.06	1.02	1.92	0.57	1.16
RP0257	1.42	1.23	0.42	-0.46	-0.52	-0.75	0.76	0.65	0.36	1.02	0.13	0.46	0.54	0.54	0.82	0.62	0.14	0.54	1.3	0.09	0.98	-0.7	-0.2	-0.24	-1.06	0.31	-1	-0.99	-1.01	-0.05	0.01	-0.36	-0.14	-0.16	-0.24	0.26	-0.39	-0.46	-0.08	-0.34	-1.12	0.41	-0.44	1.29	1.37	0.31	-0.03	0.37	-0.18
RP0258	1.37	2.54	3.25	1.04	1.81	1.28	0.53	1.24	0.82	-0.31	0.32	-0.15	0.1	1.54	1.22	0.11	0.51	0.43	0.03	-0.56	-0.61	-1.28	-0.76	-1.11	-0.87	-0.76	-1	-1	-0.87	-0.87	-0.96	-0.63	-1.12	-0.38	-1.17	-0.62	-0.36	-0.24	-0.85	-0.68	-0.82	-0.62	-1.27	-0.07	0.57	-0.94	-1.49	-1.07	-0.75
RP0259	0.62	0.9	0.62	-0.6	1.19	0.25	0.41	0.73	0.58	0.27	0.59	0.69	1.04	1.22	0.96	0.32	1.35	1.11	1.37	-0.41	0.8	1.02	0.48	0.96	0.99	1	-0.61	1	-0.82	0.4	0.75	0.46	-0.7	1	0.18	-0.35	0.87	1.39	0.41	1	-0.11	0.43	1.14	1.03	0.15	0.96	1.21	0.67	0.57
RP0260	1.18	1.52	1.29	0.84	1.18	0.76	1.36	0.99	1.06	1.25	1.03	1.24	1.61	0.83	0.97	1.28	0.74	0.77	1.87	1.27	1.14	0.29	0.81	0.58	1	1.21	1	1	-0.98	0.97	0.96	0.75	0.81	1	0.64	1.06	0.82	1.6	1.14	1	-0.42	1.15	0.79	2.03	1.25	0.93	0.96	1.06	1.01
RP0261	0.91	1.7	0.27	0.27	0.83	-0.09	0.98	0.97	0.42	0.87	0.5	0.43	0.65	0.85	-0.08	0.41	0.46	0.02	2.17	1.52	1.38	0.96	0.78	0.87	1	0.63	1.01	1	-0.45	0.53	0.79	0.73	1.21	1	0.44	0.84	1.03	0.74	1.38	1	0.75	0.61	1.01	0.76	1.42	0.99	0.75	1.04	1.02
RP0262	1.82	0.71	1.55	1.64	0.88	1.62	1.6	1.36	1.68	1.71	1.71	2.11	2.02	1.53	2	1.53	1.68	2.05	1.78	1.7	1.43	0.82	0.98	0.88	0.96	1.02	1	1	-0.78	1.05	0.92	0.69	0.77	1	0.43	1.79	0.96	0.4	0.4	1	0.95	1.16	0.7	1.52	1.49	0.79	0.61	1.13	0.99
RP0263	1.36	1.88	1.16	1.49	1.69	1.79	0.77	0.7	1.09	0.83	0.85	0.99	0.49	1.1	0.93	1.22	1.05	1.24	1.18	0.63	1.09	-0.4	0.3	0.2	-1.07	0.24	-1	-1	-1.03	0.26	0.26	0.38	0.45	0.56	-0.21	0.24	-0.17	0.95	0.79	-0.3	-0.78	0.57	0.16	1.19	1.17	-0.12	1.05	0.53	0.48
RP0264	2.14	2.12	1.8	0.29	2	1.59	1.11	1.78	1.67	0.82	1.35	1.27	0.73	1.85	1.38	1.36	1.6	1.45	0.99	1.05	1.3	-0.09	0.57	0.55	-0.98	0.31	-1	-1	-1	0.7	0.64	0.76	0.83	0.7	0.48	0.8	0.11	1.45	0.87	0.09	-0.32	0.75	0.4	0.9	1.26	-0.29	1.03	1.02	0.71
RP0265	1.41	1.87	2.01	0.46	1.09	0.97	0.64	2.24	1.51	0.69	1.64	1.53	0.94	1.96	1.6	0.34	1.39	1.21	1	0.27	0.26	0.77	-0.05	0.69	0.95	-0.37	-0.31	1	-1.46	-1.28	0.26	0.43	0.9	1	-0.21	-0.99	0.86	0.09	0.94	1	-0.26	-1.22	0.76	0.38	1.06	0.72	-0.33	-0.7	0.25
RP0266	0.68	1.3	1.54	0.23	0.53	0.52	1.18	0.86	0.93	0.77	0.81	1.08	1.04	0.67	0.67	0.07	0.64	0.49	1.24	0.33	-0.27	0.64	0.99	1.28	0.99	-0.27	1	1	-0.98	-0.51	0.89	0.04	-0.2	1	0.58	-0.84	0.86	-0.56	0.35	1	0.37	-0.61	1.14	0.79	1.59	1.01	1.11	0.31	0.76
RP0267	1.43	2.3	2.03	1.75	1.94	2.27	0.94	0.9	0.91	0.95	0.79	1	1.23	1.66	1.44	1.15	1.57	1.43	1.55	0.39	1.14	0.77	0.92	1.15	-0.89	0.85	-1	-0.96	-0.91	0.9	0.9	0.25	-0.21	0.72	0.76	-0.02	0.54	0.23	0.52	0.51	0.2	1.2	0.91	1.84	1.63	1.56	1.13	1.1	0.93
RP0268	1.35	2.44	1.78	0.85	2.07	2.03	1.39	1.21	1.4	0.95	0.75	0.96	0.43	1.78	1.71	0.64	1.29	1.35	0.83	0.46	0.99	-0.19	0.22	0.17	-1.18	0.22	-1	-1	-1.02	0.56	0.24	0.36	0.42	0.64	-0.32	0.22	-0.34	0.94	0.79	-0.44	-0.79	0.52	0.27	0.92	1.28	-0.25	1.07	1	0.37
RP0269	1.24	-0.23	0.19	0.79	-0.47	0.04	1.06	0.49	0.92	0.99	0.37	0.8	0.96	0.42	0.76	0.71	0.07	0.21	1.22	0.74	0.47	1.07	1.13	1.5	0.98	0.11	1	1	-0.2	-0.42	1.04	0.68	0.16	1	1.09	-0.05	0.92	-0.06	0.16	1	0.92	0.28	1.05	1	1.4	0.98	1.05	0.7	0.81
RP0270	0.59	1.01	1.36	0.1	0.74	0.62	1.25	1.08	1.14	1.61	1.11	1.32	1.16	0.97	1	0.83	0.5	0.63	0.95	1.14	0.47	1.02	1.25	1.18	1	0.05	1	1	0.84	-0.95	1.12	0.91	1.15	1	1.21	0.39	1.05	0.08	1.24	1	1.04	-0.19	1.05	0.31	1.34	1.02	1.35	0.54	1.18
RP0271	1.72	1.31	0.46	1.04	0.8	1.17	1.03	1.07	1.04	0.17	0.68	0.65	0.52	0.53	0.54	-0.07	0.38	0.16	0.88	-0.07	-0.23	0.51	0.43	0.65	1	-0.28	1	1	-0.69	-0.7	0.84	0.71	0.14	1	0.57	-0.4	1.03	-0.07	0.21	1	0.8	-0.74	1.05	-0.09	1.32	1.01	1.02	0.19	0.67
RP0272	1.42	1.61	1.28	1.33	1.38	1.49	1.21	0.92	1.16	1.55	1.01	1.45	0.99	1.02	1.01	1.26	1.15	1.32	1.88	0.95	0.88	0.66	-0.21	0.16	-0.94	1	-0.6	-0.96	1	-1	-1.88	0.32	0.03	0.72	1	-1	-1.29	2.02	0.72	-1.01	1	-1	-0.72	2.26	1.37	-0.57	0.94	0.27	-1.34
RP0273	0.79	0.01	-0.15	0.05	-0.36	-0.3	0.98	0.64	0.93	1	0.75	1.13	0.99	0.89	1.07	1	0.71	0.94	0.15	0.69	0.47	1.03	1.13	1.32	0.68	-0.14	-0.84	1	1	-1	0.95	0.6	-0.65	1	1	-1	0.77	-0.45	-1	1	1	-1	0.6	1.02	-0.61	0.99	0.99	-0.79	0.76
RP0274	1.41	0.67	0.68	1.63	0.04	0.98	1.81	-0.33	0.27	2.16	0.09	1.07	1.1	-0.04	-0.28	1.44	-0.34	0.26	1.35	0.65	0.26	-0.11	0.1	-0.16	0.99	0.09	1	1	0.7	-0.83	0.82	0.9	1.09	1	0.25	0.58	1.01	0.23	1.6	1	0.61	0.15	0.4	0.92	1.19	0.97	1.26	-0.43	0.65
RP0275	0.04	2.87	2.19	0.27	1.27	0.5	0.64	2.75	1.89	1.5	1.77	1.79	0.95	3.51	2.58	1.32	1.9	1.43	0.76	1.18	0.92	0.79	0.25	0.54	1	-0.07	-0.45	1	-0.82	-0.63	-0.23	0.6	0.51	1	-1.12	0.51	0.76	0.84	0.73	1	-0.38	0.17	0.71	0.29	0.88	0.79	0.39	-0.01	0.56
RP0276	1.24	0.47	0.43	0.35	0.71	0.64	-2.78	-0.82	-1.92	-2.78	-0.56	-1.31	-0.88	0.21	-0.7	-1.37	0.98	0.05	1.32	-2.41	-0.59	0.63	-0.36	0.25	-1.04	0.36	-0.97	-0.96	1.16	-1	-0.34	-1.16	-1.49	-1.62	-0.33	-0.38	-0.22	-0.27	-1.05	-0.78	0.32	-0.7	-0.54	0.9	1.38	0.18	0.79	-0.55	-0.47
RP0277	0.6	0.27	-0.02	0.13	-0.2	-0.1	0.91	0.87	1.05	0.97	0.84	1.34	0.83	0.93	0.95	0.97	0.78	0.94	0.6	0.68	0.39	0.86	1.8	1.19	0.68	-0.14	-0.84	1	1	-1	0.95	0.6	-0.65	1	1	-1	0.77	-0.45	-1	1	1	-1	0.31	1.16	0.68	0.88	1.91	-0.22	1.07
RP0278	2	2.06	1.87	1.35	1.78	1.84	0.94	1.12	1.14	0.76	0.76	0.73	1.89	1.53	1.44	1.22	1.46	1.37	0.78	0.67	0.9	-0.27	0.43	0.27	-1.05	0.25	-1	-1	-1.01	0.62	0.62	0.74	0.59	0.52	0.62	0.43	0	0.9	0.35	-0.15	-0.27	0.48	0.31	0.65	1.29	-0.32	1.09	0.96	0.56
RP0279	1.8	2.43	1.81	1.08	0.99	0.75	1.66	0.97	0.74	1.66	0.51	1.04	1.73	1.1	0.53	1.1	0.41	0.49	1.09	1.04	0.65	0.65	0.26	0.51	0.98	-0.3	1	1	-1.02	-0.67	0.07	-0.34	1.05	1	-0.95	0.19	0.77	-0.59	0.94	1	-0.13	-0.53	0.48	0.35	1.43	0.56	1.03	0.27	0.56
RP0280	2.23	0.34	0.08	0.9	-0.69	-0.44	1.92	-0.35	-0.34	1.45	-0.8	0.19	1.53	-0.6	-0.99	1.13	-0.84	-0.51	1.61	-0.14	0.11	0.83	0.04	0.69	0.93	0.73	-1.12	1	0.07	-0.74	0.4	1.1	0.23	1	0.31	-0.19	0.91	1.54	-0.5	1	0.37	-0.42	0.83	1.15	1.24	0.8	1.72	-0.59	0.39
RP0281	1.2	0.77	0.57	0.66	0.94	0.83	1.38	1.1	1.11	1.11	1.24	1.4	1.31	0.61	0.69	0.86	0.88	0.93	1.63	1.31	1.05	0.91	1.55	1.34	1.01	0.45	1	1	1	-0.93	1.17	0.99	1	1	1	0.21	1.02	-0.13	0.87	1	1	-0.18	0.82	1.1	1.1	0.86	0.97	0.53	1.17
RP0282	1.82	0.63	0.23	0.82	1.77	0.98	0.94	0.51	0.6	0.79	0.54	0.68	1.42	0.29	-0.01	1.3	0.71	0.83	1.48	0.66	1.37	0.27	0.5	0.36	-1.01	0.31	-1	-1	-1.01	0.38	0.7	0.75	0.45	0.55	0.65	0.58	-0.23	1.18	0.01	-0.46	-0.58	0.51	0.94	1.34	1.67	0.27	1.63	0.99	0.56
RP0283	1.55	0.82	1.12	0.46	0.62	0.79	0.71	1.7	1.69	-0.7	1.12	1.26	0.85	1.31	1.71	-0.93	0.63	0.46	0.34	-1.31	-1.52	0.72	-0.05	0.44	0.99	-0.7	-1.32	1	-0.31	-0.97	-0.48	-0.42	-0.46	1	-1.2	-1.84	0.63	-0.83	-1	1	-0.63	-1.86	0.59	0.54	1.37	0.7	0.52	-0.41	0.16
RP0284	1.89	0.08	0.67	1.49	0.4	0.56	0.47	0.61	0.34	1.26	0.97	1.48	1	-0.13	0.46	1.46	0.48	0.99	1.7	0.9	0.52	1.03	1.07	1.23	1.02	0.11	1	1	1	-1.01	1.17	0.81	0.7	1	1	-1.12	1	-0.42	0.81	1	1	-1.27	1	0.82	1.05	1	1	0.49	0.98
RP0285	2.15	1.33	0.58	-0.14	1.1	0.01	1.63	1.99	2.12	1.32	1.49	1.55	2.11	1.96	1.53	1.44	1.49	1.04	1.66	1.9	1.43	0.99	0.96	0.91	0.97	0.29	0.14	1	-0.68	0.01	0.73	0.74	1.09	1	-0.29	1.27	0.98	1.27	1.09	1	0.5	1.25	0.95	1.34	0.58	1.03	0.46	0.38	1.18
RP0286	0.31	0.5	-0.18	0.42	-0.65	-0.55	-0.11	0.8	0.07	-0.17	-0.47	-0.49	0.59	1.18	0.4	0.26	-0.34	-0.33	-0.24	-0.74	-0.93	-1.27	-1.4	-1.29	-0.95	-0.29	-1	-1	-1.02	-0.69	-1.19	-0.64	-0.58	-0.23	-1.18	-1.12	-0.26	-0.77	-0.33	-0.08	-0.89	-1.25	-0.94	0.3	1.11	-1.16	1.84	-1.32	-1.18
RP0287	1.97	0.68	-0.22	-0.29	0.48	0.34	1.39	1.27	1.39	0.67	0.96	1.33	1.3	1.02	0.63	0.36	0.81	0.73	0.73	0.05	-0.28	0.75	0.19	0.51	1	0.06	-1.51	1	0.1	-1.04	-0.17	0.64	-0.17	1	-1.11	-0.12	0.79	0.56	-0.03	1	-0.43	-0.56	0.66	0.79	1.62	0.74	1.37	-0.61	0.52
RP0288	2	0.24	1.49	1.83	0.13	1.51	1.72	1.19	2.13	1.44	1.18	1.85	1.25	1.02	1.73	1.03	0.64	1.32	1.82	1.28	0.71	1.18	1.17	1.12	0.96	0.69	1	1	-1	-0.57	1.13	0.44	1.21	1	0.96	0.69	1.04	-0.44	0.75	1	1.31	-0.13	1.16	2.12	1.44	1.02	2.01	0.73	1.13
RP0289	1.25	0.69	0.26	0.59	0.63	0.54	1.62	0.08	1.03	1.18	0.7	1.28	1.44	0.13	0.65	1.24	0.61	0.94	1.8	0.59	0.71	0.98	0.9	0.98	0.97	0.68	1	1	1	-0.75	0.96	1.36	0.97	1	1	0.8	0.94	1	1.11	1	1	0.58	1.27	0.93	1.01	1.02	2.12	0.56	0.98
RP0290	2.74	0.96	1.31	1.19	-0.28	0.15	1.83	-1.18	-0.37	0.97	-0.69	-0.09	1.45	-0.86	-0.27	0.66	-0.61	-0.43	1.82	0.83	0.9	0.96	0.81	0.87	0.99	0.86	1	1	0.8	0.07	0.84	0.92	0.22	1	0.27	1.29	0.84	0.59	0.84	1	0.6	1.03	0.91	1.55	1.29	0.99	1.37	0.8	0.84
RP0291	1.36	0.06	0.68	0.82	-0.31	0.55	0.41	-0.42	0.28	0.36	-0.72	-0.06	0.65	-0.43	0.38	0.56	-0.52	0.21	0.22	-1.33	-1.22	0.75	0.02	0.47	-0.06	-0.41	-1	1	0.75	-1	-0.41	-0.07	-1	1	-1.01	-1	-0.49	-0.71	-1	1	-0.48	-1	-0.2	1.21	1.81	0.74	1.59	-0.09	-0.5
RP0292	-0.1	-0.23	-0.86	-0.18	0.21	0.14	-0.9	-0.73	-0.87	-0.34	0.03	0.2	-1.25	-1.27	-1.43	-0.45	-0.21	-0.14	1.44	0.21	0.43	0.99	0.93	0.99	1.01	0.31	1	1	1	-0.99	1.03	1.22	0.55	1	1	0.26	0.95	0.15	1	1	1	-0.28	1.06	1.33	0.98	1.02	1	0.53	1.03
RP0293	2.31	0.09	0.01	0.32	-0.3	0.09	1.65	0.59	1.29	1.51	0.76	1.32	2.21	0.09	0.63	1.24	0.11	0.47	1.04	1.5	0.73	0.86	0.53	0.62	1.01	-0.15	-0.05	1	-0.68	-0.57	0.02	0.5	0.76	1	-1	0.95	0.84	0.81	0.59	1	-0.47	0.66	0.8	0.87	1.14	0.86	0.29	0.17	0.8
RP0294	3.2	2.97	3.46	1.67	2.83	2.62	0.66	1.55	1.44	0.02	0.84	0.67	2.51	2.12	2.92	1	2.07	1.75	1.91	0.16	1.09	0.95	0.73	0.82	1	1	1	1	-0.46	1	0.68	0.57	-0.12	1	-0.55	0.8	0.99	1.53	0.98	1	0.33	0.97	1.01	1.02	1.3	0.97	1.06	1.22	0.89
RP0295	1.37	0.5	-0.5	-1.15	0.12	-0.66	1.18	0.18	0.44	0.26	0.27	0.42	0.73	0.3	0.47	-0.1	0.17	-0.02	1.03	-0.1	-0.33	1.03	0.5	0.93	1	-0.15	1	1	-0.08	-0.82	0.87	0.43	0.44	1	0.55	-0.54	0.92	-0.59	-0.09	1	0.8	-0.79	1.7	0.77	1.36	1.01	1.1	0.58	0.58
RP0296	0.88	1.64	1.2	0.93	1.18	1.18	1.69	1.18	1.21	1.13	0.96	1.2	1.38	1.39	1.28	1.24	1.02	1.18	1.76	1.07	0.95	0.98	1.09	1	0.91	1.73	1	1	1	1.01	0.99	1.34	1.2	1	1	1.4	0.94	1.98	1.12	1	1	1.24	0.97	2.15	1.01	1.01	2.12	1.75	1.14
RP0297	1.75	2.43	2.14	1.76	1.83	1.92	2	2.2	2.18	1.75	2.16	2.15	1.6	2.01	1.94	1.23	1.83	1.72	2.12	2.59	1.82	1	1.09	0.83	1.03	1.73	1	1	1	1.03	1.17	1.34	1.23	1	1	2.17	1.02	1.23	1.05	1	1	1.64	1.03	2.36	1.07	1.04	2.12	0.95	1.51
RP0298	2.72	2.99	3.05	2.61	1.93	2.67	2.24	1.48	1.94	1.89	1.21	1.78	2.03	1.87	2.12	2.18	1.44	1.96	1.97	1.28	1.2	1.17	1.22	1.22	1.04	0.8	1	1	1	-0.61	1.17	0.8	1.14	1	1	-0.38	1.01	-0.43	0.77	1	1	-0.57	0.92	1.18	1.04	1.02	1.19	0.58	1.05
RP0299	0.96	0.02	0.09	0.38	0.03	0.18	2.02	1.06	1.44	2	1.22	1.77	1.99	1.04	1.06	1.65	0.92	1.18	-0.03	1.12	0.93	0.15	0.91	0.74	-0.96	-0.41	-1	-1	-0.21	0.03	0.79	0.98	0.56	0.43	1.01	1.39	0.76	0.81	0.98	0.57	1.12	0.95	0.9	0.06	1.13	-0.68	-0.22	0.52	0.98
RP0300	0.19	0.12	0.48	-0.16	-0.52	-0.63	-0.14	-1.26	-1.35	-0.97	-1.67	-1.93	-0.25	-0.89	-1.24	-1.08	-1.34	-2.01	0.2	-1.41	-1	-0.76	-1.53	-1.41	-1.08	-1.38	-1	-1	-0.96	-1.18	-1.89	-1.18	-1.41	-1.81	-1.06	-0.99	-1.64	-1.45	-1.26	-1.44	-1.69	-1.31	-0.27	-0.7	1.13	-0.63	1.86	-1.51	-1.74
RP0301	1.1	0.86	0.71	0.95	0.89	0.77	-0.08	0.08	0.18	0.28	0.29	0.72	-0.21	0.52	0.33	0.06	0.7	0.8	1.71	0.28	0.86	0.67	-0.18	0.17	-1.69	-0.66	-0.68	-0.99	-0.85	-1	-3.25	-2.8	1.5	-0.58	-0.87	-1	-2.48	-1.15	1.43	-1.01	-1.01	-1	-1.8	0.66	2	-1.27	0.02	0.28	-2.51
RP0302	-0.31	-0.89	-1.43	0.2	-0.65	-0.15	-0.27	0	-0.2	1.02	0.39	0.92	-0.16	-0.51	-0.61	0.89	0.09	0.59	0.23	0.79	0.45	1.02	1.15	1.2	0.92	0.58	-0.74	1	1	-1.07	1.17	1.05	0.25	1	1	-0.67	1.01	0.01	-0.2	1	1	-0.82	0.99	1.2	-0.15	1.02	1.92	-1.17	1.04
RP0303	3.26	1.8	1.91	1.92	1.93	1.81	1.48	0.4	0.71	1.23	0.45	0.9	2.37	0.8	1.18	1.54	0.79	1	2.23	0.4	1.25	-0.29	0.99	0.47	1.01	1.97	1	1	-1	0.96	0.88	-0.12	-0.12	1	0.08	0.63	0.93	0.21	0.94	1	0.12	1.15	0.61	3.04	1.22	0.99	1.44	0.91	0.89
RP0304	0.73	1.98	1.34	0.2	0.68	0.52	0.07	0.64	0.11	-0.63	-0.39	-0.39	0.56	1.35	1.41	-0.11	0.02	0.22	1.15	-0.71	0.51	-1.06	0.06	-0.26	-0.89	-1.78	-1	-0.98	-1.01	-0.28	-0.4	-0.77	-0.88	-0.31	-1.04	-0.03	-1	-1.53	-1.01	-1.08	-1.44	0.37	-0.68	1.2	1.16	-0.28	1.68	0.08	-0.18
RP0305	2.34	2.33	1.1	0.77	0.99	0.42	0.95	0.91	0.61	1.32	0.92	1.31	0.98	1.18	0.65	0.66	0.74	0.5	1.78	1.14	0.77	0.3	0.8	0.64	1	0.23	1	1	-0.23	-0.04	0.92	0.75	1.04	1	0.41	1.09	1.03	0.3	0.8	1	1.02	0.47	0.71	0.49	1.22	1.01	-0.17	0.88	1.04
RP0306	2.3	2.4	1.23	1.4	2.66	2.06	0.64	2.3	1.47	0.66	2.13	1.41	0.86	2.42	1.51	0.8	2.46	1.52	1.35	1.18	0.87	0.88	0.7	0.76	0.95	-0.12	1	1	-0.64	-0.31	0.41	0.13	0.69	1	-0.74	1.18	0.77	-0.09	0.61	1	0.21	0.55	0.76	0.64	1.33	0.88	0.58	0.62	0.71
RP0307	0.63	-0.6	-0.88	-0.53	-1.08	-1.44	-1.18	-0.58	-0.89	-1.15	-0.94	-1.35	-1.91	-1.05	-1.42	-1.36	-0.64	-1.14	0.29	-1.26	-1.15	-1.08	-1.86	-2.08	-1.13	-0.45	-1	-1	-1.06	-0.22	-0.96	-0.11	-0.93	-1.03	-0.52	-0.71	-1.2	-0.17	-0.92	-1.02	-1.41	-0.36	-0.85	-0.34	1.22	-1.06	2.02	-0.94	-1.55
RP0308	0.94	0.45	-0.39	-0.42	0.21	0.05	-0.04	0.52	-0.07	-0.02	0.32	0.16	-0.36	0.01	-0.82	-1.02	-0.48	-1.18	-0.39	0.03	-0.62	-0.61	0.26	0.02	-0.91	-0.77	-1	-1	-0.24	-0.74	0.61	0.42	0.35	0.34	0.62	-0.23	0.28	-0.12	0.15	-0.12	0.26	-0.34	-0.64	-0.2	1	-0.56	1.05	-0.89	0.35
RP0309	2.48	1.68	2.16	1.97	1.13	1.82	2.92	1.69	2.09	2.66	2.1	2.48	3.32	1.81	2.11	2.84	1.9	2.16	1.92	1.74	1.4	0.99	1.09	0.94	1	1.2	1	1	0.23	1.05	1.01	1.06	0.63	1	0.8	1.82	1	1.24	0.79	1	0.99	1.39	1	1.94	1.27	1.03	1.2	1.15	1.16
RP0310	2.45	0.48	1.22	2.09	-0.4	0.39	2.05	-1.06	0.76	0.56	-0.74	-0.19	1.62	-0.62	0.96	1.18	-0.96	-0.28	1.37	0.32	0.27	0.95	0.68	0.87	1	0.4	1	1	0.88	-0.72	0.88	1.14	0.9	1	0.91	0.26	1.04	0.53	0.58	1	0.91	-0.12	1	1.12	1.3	0.97	1.33	0.55	0.94
RP0311	0.76	1.27	0.79	1.1	0.67	0.96	0.88	0.19	0.52	0.67	0.2	0.6	0.56	0.39	0.23	0.64	0.25	0.4	1.44	0.2	0.69	0.89	0.83	0.87	-1.01	1.74	-1	-0.96	1.11	0.96	0.56	0.03	-0.3	-0.69	1.23	1.67	0.05	0.76	-0.73	-0.44	1.01	1.19	-0.13	1.49	1.14	0.56	1.1	1.22	0.69
RP0312	1.94	2.23	1.54	0.57	2.22	1.82	0.47	1.78	1.35	0.51	1.34	1.21	0.31	1.83	1.36	0.33	1.33	1.15	1.71	0.98	0.81	1.02	0.86	1.02	1	0.93	1	1	0.31	0.33	1.03	1.21	1.04	1	1.17	0.81	1.04	0.74	0.84	1	1.09	0.33	1.17	1.59	1.62	1.02	1.28	1.05	0.98
RP0313	0.48	0.45	-0.95	-0.02	0.66	0.44	1.08	0.86	0.85	0.84	0.84	0.98	0.89	0.79	0.68	0.41	0.76	0.63	0.54	0.99	0.75	0.49	0.84	0.76	0.99	-0.54	1	1	-0.68	-0.82	1.04	0.57	1.18	1	0.92	0.07	0.99	-0.11	1.28	1	0.55	-0.21	0.95	0.18	1.75	1.02	0.96	-0.11	0.93
RP0314	1.5	0.07	1.07	0.41	0.87	1.65	0.66	0.59	0.77	0.62	0.9	0.97	1.32	-0.08	1.04	0.21	0.42	0.48	0.13	0.67	-0.02	-0.16	0.67	0.26	-0.91	-0.42	-1	-1	-0.73	-0.72	0.98	0.76	0.8	0.79	1.07	-0.02	0.66	0.3	0.78	0.39	0.45	-0.16	-0.07	0.39	1.17	-0.12	0.86	-0.28	0.77
RP0315	2.84	0.71	1.17	1.06	-0.08	0.57	3.27	1.72	1.94	2.46	1.4	1.69	3.7	1.64	1.93	2.62	1.29	1.69	1.71	1.21	1.39	0.85	0.57	0.77	0.98	0.63	1	1	-0.97	0.46	0.62	0.51	1.21	1	0.18	0.34	0.93	0.58	1.23	1	0.16	0.28	0.87	1.3	1.26	0.83	1.2	1.01	0.84
RP0316	2.22	1.19	0.98	1.12	0.17	0.61	0.9	0.62	0.32	0.49	0.34	0.87	0.75	0.57	-0.02	-0.06	0.19	0.14	1.52	0.75	0.61	0.3	0.47	0.41	1	0.72	1	1	0.8	-0.22	0.89	1.18	1.07	1	0.9	0.71	1.04	0.9	0.81	1	0.92	0.41	0.74	1.35	1.23	0.98	1.33	0.37	0.84
RP0317	1.07	1.74	-0.01	1.38	2.73	1.92	0.72	1.16	0.93	0.18	0.76	0.65	0.34	1.28	-0.19	0.6	1.35	0.74	0.45	0.4	0.39	-0.12	0.22	0.02	-1.03	-0.47	-1	-1	-0.94	-0.04	0.39	0.65	0.19	0.33	0.09	0.62	0.27	0.77	0.17	-0.12	0.03	0.43	0.09	0.5	1.19	-0.28	0.86	0.32	0.39
RP0318	1.09	2.88	2.52	1.35	1.1	1.07	0.6	1.24	0.95	1.33	1.02	1.4	0.52	1.94	1.29	1.54	1.36	1.54	1.82	0.96	1.33	0.39	0.61	0.82	1	0.74	1	1	-0.72	0.57	0.89	0.91	1.02	1	0.77	0.43	0.97	1.51	1.21	1	0.34	0.74	0.97	1.43	1.31	0.99	0.95	0.9	0.84
RP0319	2.28	2.51	1.63	0.69	2.1	1.17	1.45	1.45	1.36	1.25	1.32	1.56	0.62	1.93	1.5	1.05	1.56	1.48	1.88	1.2	1.3	0.33	0.62	0.54	1	1.21	1	1	-1	0.97	0.63	0.25	0.79	1	-0.22	0.89	0.8	1.58	1.33	1	-0.36	1.08	0.96	2.06	1.98	1.01	1.03	1.07	0.78
RP0320	1.08	1.13	1.44	0.98	0.7	1.16	1.11	0.44	1	1.24	0.86	1.24	0.05	0.41	0.47	0.72	0.74	1.09	0.57	0.59	0.52	-0.1	0.66	0.33	-0.93	0.28	-1	-1	-0.42	1	0.71	0.82	0.4	0.29	1.01	0.92	0.31	0.99	0.68	-0.07	0.5	1.04	-0.66	-0.03	0.92	-1.03	-0.48	0.92	0.79
RP0321	1.12	2.01	1.31	1.33	0.87	1.67	0.95	0.87	0.94	1.35	0.8	1.26	0.18	1.01	0.72	1.02	0.56	1.08	1.5	0.74	0.77	0.19	0.64	0.62	1	0.2	1	1	-0.79	-0.1	0.97	0.53	0.11	1	0.77	-0.24	0.9	0.35	0.8	1	0.18	0.3	0.85	0.98	1.31	0.95	0.95	0.71	0.91
RP0322	1.27	-0.19	0.08	0.91	-0.62	-0.6	0.66	-0.45	-0.09	-0.04	-0.84	-0.39	0.32	-0.2	-0.11	0.15	-1.27	-1.11	0.1	-0.43	-0.75	-0.67	-0.96	-0.93	-1.15	-1.41	-1	-1	-0.99	-1.35	-0.35	-0.26	0.35	-0.2	-0.16	-0.8	-0.65	-1	0.76	-0.51	-0.75	-1.4	0.19	-0.21	1.26	-0.27	1.34	-1.47	-0.86
RP0323	0.4	-0.26	-0.53	-0.45	-0.65	-0.51	0.88	0.74	0.97	0.92	0.76	1.18	0.71	0.79	0.79	0.8	0.66	0.82	-0.43	0.62	0.29	0.9	1.64	1.34	0.68	-0.14	-0.84	1	1	-1	0.95	0.6	-0.65	1	1	-1	0.77	-0.45	-1	1	1	-1	0.2	0.57	0.51	0.85	0.97	-0.75	0.96
RP0324	1.06	1.06	0.76	1.35	1.01	1.11	0.58	1.01	0.82	0.48	0.82	0.87	-0.31	1.37	0.54	-0.31	1.33	0.9	1.7	0.46	0.52	1.03	1.13	1.21	-0.99	-1	-1	-0.96	-1	1.05	0.76	-0.35	-0.23	0.09	0.86	0.46	0.2	-1.32	-0.45	0.02	0.75	1.02	0.08	2.56	1.43	1.23	1.88	1.09	0.8
RP0325	1.61	1.48	0.4	0.98	0.89	0.79	1.18	1.13	1.07	1.37	1.34	1.42	1.21	1.52	0.91	1.32	1.37	1.18	1.61	1.31	1.16	0.99	1.12	1	0.99	0.16	1	1	-0.23	-0.1	1.11	0.96	1.21	1	1.15	0.95	1.05	0.79	1.19	1	1.19	0.83	0.95	1.28	1.27	1.02	0.56	1.35	1.21
RP0326	0.3	1.11	0.86	1.1	0.62	1.03	1.23	0.87	0.74	0.57	0.37	0.25	0.59	1.22	1.04	0.1	0.36	0.08	1.33	0.18	0.09	-0.94	-0.43	-0.8	0.98	-0.15	1	1	-0.92	-0.49	0.25	0.14	0.63	1	-0.59	-0.16	0.68	0.28	0.85	1	-0.79	-0.03	0.26	0.42	1.2	0.63	-1.08	-0.42	0.04
RP0327	1.52	3.02	2.91	1.86	1.89	1.81	1	1.47	1.14	1.1	0.63	0.92	1.39	2.54	2.03	1.27	0.93	0.71	1.37	0.34	0.79	0.63	0.51	0.9	-0.78	0.06	-1	-0.96	-1.04	0.37	0.8	0.06	0.06	0.31	0.74	-0.47	0.34	-0.54	-0.4	0.17	0.19	0.24	1.09	1.41	1.6	1.34	1.3	0.84	0.52
RP0328	0.9	1.45	0.73	1.03	0.56	0.61	0.44	0.16	0.33	0.22	0.1	0.1	-0.59	0.07	-0.09	-0.69	0.14	-0.26	0.88	0.07	0.01	0.82	0.59	0.94	-0.96	-0.48	-1	-0.96	-0.27	-0.61	0.66	0.11	-0.46	0.09	0.87	-0.22	0.05	-0.84	-0.4	0.02	0.28	0.22	-0.08	0.89	1.9	2.08	1.5	0.25	0.45
RP0329	1.33	0.98	0.41	1.98	-0.19	-0.06	-0.35	0.63	0.58	-0.05	0.39	0.37	1.07	1.14	0.96	1.45	0.55	1.09	0.62	-0.15	0.39	-0.73	0.39	0.12	-0.95	-0.06	-1	-1	-0.77	0.19	0.42	0.28	-0.51	0.07	0.16	0.28	0.03	0.56	-0.34	-0.33	-0.29	0.65	-1.06	0.91	0.7	-0.7	-1.18	0.33	0.41
RP0330	2.4	0.33	1.62	2	-0.02	1.38	1.85	0.62	1.35	1.91	-0.18	0.82	2.19	0.6	1.93	2.5	-0.35	0.71	1.54	1.1	1.07	0.97	0.74	0.86	1.01	0.12	1	1	-0.57	-0.09	0.73	0.37	1.06	1	-0.23	0.63	0.99	0.5	1.31	1	0.51	0.58	1.03	0.41	1.65	1	0.54	0.81	0.99
RP0331	1.58	2.3	2.72	2.12	2.46	2.65	1.23	1.3	1.68	0.71	0.93	1.02	1.69	1.49	2.14	0.9	1.3	1.2	0.98	0.57	0.82	-0.12	0.51	0.24	-0.85	0.31	-1	-1	-0.91	0.75	0.78	0.47	0.76	0.73	0.54	0.33	0.39	0.88	0.36	0.03	0.17	0.64	0.24	0.94	1.22	-0.44	0.99	1.02	0.68
RP0332	1.55	1.57	0.77	0.69	0.2	0.51	1.1	0.23	0.27	0.8	-0.49	0.09	1.67	0.25	0.67	0.98	-0.65	-0.05	0.23	0.28	-0.58	0.97	0.69	0.74	0.93	-0.98	1	1	-0.98	-1	0.1	-1.16	0.5	1	-1.2	-0.15	0.57	-1.14	0.31	1	-0.16	-0.78	0.87	0.24	1.65	1	1.08	0.51	0.58
RP0333	0.06	1.28	0.51	-0.45	-0.69	-0.36	-0.7	-0.04	-0.25	-1.32	-0.86	-0.77	-0.41	-0.19	-0.12	-0.8	-1.08	-0.95	0.04	-1.4	-1.33	-1.03	-1.24	-0.98	-0.85	-1.23	-0.97	-1	-0.81	-1.12	-1.98	-0.53	-1.62	-1.56	-1.17	-1.27	-0.86	-0.71	-0.34	-1.17	-0.65	-1.46	-1.17	-0.57	1.02	-1.22	-1.23	-0.86	-1.37
RP0334	2.01	2.61	0.56	1.91	2.83	2.21	1.74	0.85	1.35	1.26	1.23	1.16	1.71	1.33	1.32	1.58	1.74	1.51	1.97	1.02	1.15	0.28	0.46	0.53	0.98	1	1	1	-0.86	0.78	0.68	0.7	1.1	1	0.19	0.57	0.97	0.97	1.17	1	0.34	0.55	0.78	1.62	1.27	0.85	0.04	1.09	0.8
RP0335	2.14	1.5	1.89	1.7	2.08	2.6	1.86	1.45	1.77	1.82	1.31	1.82	1.73	1.53	1.58	1.32	1.2	1.44	1.92	1.22	0.96	0.09	0.46	0.35	1	0.37	1	1	-0.17	-0.14	0.95	0.87	1.17	1	0.72	1.04	1.01	0.23	1.08	1	0.91	0.4	0.62	1.1	1.55	0.9	1.12	0.56	0.79
RP0336	0.38	2.56	2.28	0.97	1.13	1.39	1.53	1.63	1.64	1.4	1.37	1.53	0.17	1.81	1.42	1.69	1.36	1.55	1.6	1.15	1.4	1.03	0.81	0.96	0.99	0.7	1	1	-0.95	0.54	0.75	0.66	0.98	1	0.09	0.91	0.96	1.44	1.65	1	0.28	0.95	1.25	1.67	1.88	1.01	1.04	1.15	1
RP0337	0.03	-0.41	-0.71	-0.82	-1.37	-0.99	1.01	0.02	0.65	0.36	-0.32	-0.03	0.64	0.06	0.96	0.03	-0.23	-0.17	-0.14	-0.31	-0.02	0.97	0.51	0.9	-0.94	-0.92	-1	-0.99	0.19	-0.79	0.53	0.43	-0.36	0.24	0.32	0.24	0.32	-0.13	0.67	0.11	0.22	0.28	0.42	-0.1	1.66	0.46	1.49	0.43	0.39
RP0338	2.34	1.95	2.69	1.73	0.68	1.52	0.71	0.53	0.84	1.24	0.81	1.28	1.57	0.94	1.16	1.3	0.7	1.14	1.91	1.28	0.97	0.83	0.81	0.87	1	0.29	1	1	-0.23	0.03	1.01	0.85	1.03	1	0.83	1.17	1	0.12	0.63	1	1.09	0.45	0.81	1.07	1.43	0.81	0.5	0.76	0.97
RP0339	1.08	0.92	0.55	0	0.7	0.06	1.33	1.25	1.65	0.73	1.33	1.35	1.03	0.79	1.08	0.24	0.9	0.63	1.44	1.46	1.1	0.96	1.37	1.18	1.04	0.13	1	1	1	-1.01	1.16	0.82	1	1	1	-0.31	1.02	-0.44	0.87	1	1	-0.64	0.95	1.29	1.08	0.97	1.91	1.14	1.14
RP0340	1.21	1.43	0.36	0.77	0.49	0.32	0.9	1.1	0.7	0.43	-0.1	0.06	0.64	1.71	0.96	0.5	0.06	0.43	0.72	-0.15	0.72	-0.42	-0.4	-0.31	-0.88	-0.58	-1	-1	-1.01	-0.66	-0.63	-0.11	-0.12	-0.09	-0.85	-0.28	-0.61	0.09	-0.04	-0.47	-1.14	-0.05	-0.06	0.29	1.15	-0.55	0.33	-0.36	-0.42
RP0341	1.82	1.83	1.83	1.37	1.3	1.57	1.76	0.44	1.03	1.19	0.23	0.82	1.53	0.62	1.05	1.19	0.28	0.87	2.51	0.5	1.4	0.62	0.52	0.63	-0.8	0.56	-1	-1	-0.96	0.61	0.74	0.62	0.25	0.75	0.4	0.47	0.32	1.09	0.37	0.1	-0.27	0.81	1.22	2.21	1.67	0.33	1.78	1.15	0.65
RP0342	0.98	2.17	1.76	0.14	1.01	0.94	0.93	2.6	1.84	1.08	1.13	1.44	0.71	2.84	1.76	1.12	1.25	1.28	0.86	0.26	0.24	0.76	0.08	0.48	1	0.16	-1.53	1	-0.5	-0.84	-0.34	0.58	-0.16	1	-1.17	-0.08	0.73	0.89	-0.6	1	-0.5	-0.37	0.67	0.98	1.07	0.74	0.39	-0.5	0.41
RP0343	2.86	2.38	3.08	1.39	1.85	1.52	2.41	2.4	2.41	2.29	1.96	2.18	2.44	2.51	2.42	2.47	1.98	1.97	2.19	1.96	1.83	1.03	1.05	0.96	0.97	1.97	1	1	-1	0.79	1.02	0.42	0.64	1	0.71	1.18	1.01	1.55	1.13	1	0.73	1.47	1.31	2.85	1.41	0.98	1.91	1.89	1.13
RP0344	1.91	0.71	1.87	0.76	0.96	1.17	0.58	0.38	0.31	0.08	0.37	0.49	1.6	0.94	1.34	0.79	0.99	1.15	1.24	0.04	0.66	-0.4	0.07	0.29	-0.78	0.82	-1.01	-1	-1.03	0.39	0.25	0.74	0.02	0.38	0.15	-0.08	0.29	1.06	-0.6	-0.01	-0.41	0.13	-0.31	1.12	1.31	-0.5	-0.33	0.21	0.3
RP0345	1.8	0.39	1.22	0.18	-0.24	0.47	1.81	1.44	1.85	1.59	1.35	1.6	0.68	0.41	0.99	-0.24	-0.02	-0.09	1.22	1.67	0.37	-0.36	-0.13	0.09	0.95	0.39	1	1	0.32	-0.68	1.12	0.89	0.22	1	1.16	-0.58	1.04	0.28	0.82	1	1.01	-0.41	0.13	0.59	1.44	0.55	1.22	0.32	0.97
RP0346	1.41	1.88	1.98	0.73	1.08	0.94	0.82	2.02	1.62	-0.22	1.22	0.4	1.22	2.2	1.73	-0.14	1.07	0.25	0.12	-0.29	-0.41	0.12	-0.15	0.14	-0.88	-0.23	-1.16	-1	-0.82	-0.63	0.11	0.48	-0.74	-0.2	0.17	-0.48	0.3	0.1	-1.11	-0.14	0.35	-0.71	0.12	-0.04	1.06	-0.16	-0.26	-0.77	-0.08
RP0347	1.79	0.89	1.08	1.53	0.79	1.27	2.18	1.14	1.62	2.17	1.23	1.79	1.84	0.8	1.1	1.62	1.08	1.45	2.05	1.57	1.51	0.9	0.65	0.81	0.99	0.53	1	1	-0.79	0.36	0.62	0.44	1.1	1	0.06	0.58	0.99	0.29	1.13	1	0.43	0.34	0.93	1.43	1.41	0.9	0.58	0.97	0.89
RP0348	0.17	0.41	-0.1	1.04	0.5	0.78	0.54	-0.47	-0.25	0.26	0.51	0.76	0.3	-0.17	-0.33	0.02	0.39	0.25	1.24	0.7	0.28	1	1.01	0.96	0.98	-0.3	1	1	-0.21	-0.72	0.84	0.47	0.82	1	0.04	0.8	0.97	-0.13	1.59	1	0.81	0.06	1.01	0.7	1.28	1.01	1.04	0.6	1.09
RP0349	1.26	2.54	2.92	0.93	1.82	1.91	-0.14	1.26	0.77	0.33	0.76	0.74	0.4	1.18	1.2	0.25	0.74	0.44	1.51	1.2	0.73	0.96	0.71	0.76	0.98	0.18	1	1	-0.27	-0.21	0.37	0.59	0.75	1	-0.91	0.98	0.91	0.59	0.71	1	0.15	0.58	0.92	0.38	1.29	0.98	1.16	0.72	0.96
RP0350	1.73	1.03	1.69	1.25	0.77	1.53	0.97	-0.24	0.48	0.12	-0.57	0.13	1.37	0.38	1.15	1.19	0.22	0.84	1.72	-1.47	-0.38	1.02	0.81	0.84	-0.96	-1	-1	-0.96	-1	1.05	0.15	-1.68	-1.65	-0.69	-0.21	-0.5	-0.03	-1.81	-1.35	0.02	0.74	-0.44	0.16	2.41	1.48	1.34	1.87	1.22	0.21
RP0351	0.71	-0.21	-0.52	-0.53	-0.8	-0.66	-0.33	0.1	-0.6	-1.04	-0.31	-0.61	-0.21	-0.2	-0.46	-0.47	-0.49	-0.74	0.32	-1.1	-0.99	0.49	-0.57	0.22	-0.11	-0.29	-0.88	1	0.48	-1	-0.53	0.23	-1.74	1	-0.7	-1	-0.59	-0.6	-1.68	1	-0.38	-1	-0.35	1.14	1.39	0.42	2.1	-0.37	-0.89
RP0352	2.17	1.62	1.55	2.32	1.57	1.83	2.22	1.86	2.24	2.57	2.06	2.27	1.76	1.42	1.47	1.67	1.59	1.78	2.27	2.48	1.71	0.87	0.29	0.51	0.99	1.01	0.99	1	-0.83	0.89	0.65	0.43	0.78	1	0.18	0.87	0.87	0.17	0.34	1	0.31	0.48	0.92	1.53	1.39	0.85	1.72	1.21	0.7
RP0353	1.03	0.37	0.13	-1.06	-0.62	-0.74	-0.54	-1.17	-1.56	-0.86	-1.06	-1.22	0.5	-0.7	-0.62	-0.4	-0.73	-0.64	-0.85	-1.61	-0.87	-0.72	-1.06	-0.92	-0.81	-1.73	-1	-0.99	-1.04	-0.92	-0.97	-0.7	-1.53	-1.21	-0.94	-1.05	-0.84	-1.23	-1.02	-1.06	-0.87	-0.96	-0.5	-0.73	1.09	-1.02	-0.52	-0.2	-1.22
RP0354	1.54	1.28	2.65	1.17	0.47	1.21	1.85	1.65	2.01	1.77	1.26	1.5	1.88	1.62	2.11	1.9	0.77	1.05	0.52	1.23	0.38	0.99	0.51	0.62	0.99	-0.02	1	1	1.26	-0.99	1.06	0.68	0.16	1	1.24	-0.99	0.88	-0.52	-0.49	1	1.07	-0.82	0.83	0.65	1.5	0.9	1.64	0.31	1.01
RP0355	2.29	3.02	2.85	2.46	2.09	2.31	1.94	1.8	1.97	2.29	1.53	2.14	1.78	2.11	2.17	1.8	1.56	1.97	2.34	1.82	1.58	1.03	0.85	0.97	0.99	0.58	1	1	-0.66	0.5	0.91	0.81	1.23	1	0.6	1.18	1.02	0.53	0.95	1	0.76	0.69	1.07	1.47	1.54	1	1.65	1.06	0.98
RP0356	1.02	1.61	1.84	0.24	0.73	0.15	0.08	0.66	0.16	-0.51	0.27	-0.08	-0.22	0.27	0.24	-1.01	-0.26	-0.92	0.44	-0.23	-0.73	-0.13	-0.18	0.21	-0.74	-0.61	-1	-0.99	-1.06	-1.01	0.3	-0.08	-0.23	0.39	0.04	-1.6	0.08	-0.75	-0.31	-0.02	-0.78	-1.67	0.56	0.04	1.36	-0.1	1.24	-0.64	-0.16
RP0357	2	2.32	2.57	0.31	2.98	1.94	0.52	1.18	0.91	0.65	1.19	0.96	1.15	1.59	1.43	1.05	1.72	1.46	1.91	0.77	1.23	0.61	0.72	0.66	1	1.21	1	1	-0.99	0.86	0.94	0.8	0.6	1	0.7	0.52	0.98	1.47	2.33	1	0.36	0.86	1.17	2.08	1.54	1.05	1.15	1.16	0.89
RP0358	1.07	0.97	0.59	0.96	1.72	1.47	1.28	1.51	1.38	1.31	1.4	1.57	1.04	1.47	1.22	1.11	1.36	1.24	1.81	1.8	1.47	0.97	1.37	1.16	0.99	1.21	1	1	-0.92	1.05	1.15	1.12	1.19	1	1.1	1.54	1.04	1.57	1.13	1	1.25	1.5	0.98	2.18	1.29	0.98	1.07	1.1	1.27
RP0359	2.29	1.37	1.92	1.71	0.67	1.39	1.42	0.16	0.51	1.39	0.37	0.83	1.17	0.46	0.81	1.2	0.27	0.55	1.64	0.66	0.41	0.41	0.59	0.69	1	0.94	1	1	1.08	-0.17	1.07	0.93	1.16	1	1.15	0.19	1.03	-0.21	1.2	1	1.06	-0.45	0.71	1.29	1.34	0.97	1.34	0.37	0.8
RP0360	1.28	1.33	0.85	1.06	0.96	0.95	1.19	1.08	1.13	1.32	1.17	1.51	1.4	1.38	1.34	1.68	1.33	1.43	1.52	1.35	1.27	1	1.37	1.2	1.04	0.29	1	1	1	-1	1.12	0.78	0.49	1	1	-0.62	0.96	-0.47	0.07	1	1	-0.57	1	1.33	1.06	1.01	1.92	0.59	1.06
RP0361	1.53	1.27	0.89	1.13	0.43	1.1	1.51	0.78	1.19	0.82	0.53	0.65	1.51	0.85	0.96	0.8	0.58	0.63	1.58	0.4	0.62	0.68	0.16	0.64	0.98	1.28	1	1	0.56	0.28	0.48	1.24	0.86	1	0.15	0.22	1.05	1.15	0.61	1	0.41	0.05	0.56	1.23	1.59	0.6	1.72	1.32	0.53
RP0362	2.04	2.58	2.13	1.56	2.06	2.34	1.07	1.24	1.34	0.84	1.04	0.95	1.31	2.05	2.1	1.73	2	2.02	2.23	0.42	0.98	-0.15	0.38	0.2	-1.11	0.81	-1	-1	-0.98	0.88	0.64	0.53	0.38	0.52	0.43	0.48	0.32	0.94	0.42	0.1	0.1	0.79	-0.31	2.23	1.18	-0.36	1.31	0.98	0.53
RP0363	1.45	-0.39	0	0.9	0.15	0.66	1.5	1.14	1.71	0.95	1.09	1.33	1.45	0.68	1.31	0.77	0.59	0.66	1.38	0.83	0.47	0.37	0.6	0.51	1	0.16	1	1	0.1	-0.4	1.08	0.86	1.22	1	1.15	0.38	1.04	-0.09	1.21	1	1.17	-0.26	0.65	0.7	1.35	0.93	1.1	0.16	0.85
RP0364	-0.33	1.98	1.48	0.56	1.64	0.77	1.71	1.02	1.36	1.04	0.99	1.13	1.32	1	1.23	1.07	1.27	1.19	1.81	0.54	1.23	0.21	0.38	0.43	0.9	1	1	1	-0.93	0.53	0.57	0.52	0.4	1	-0.13	0.28	0.79	1.56	1.5	1	-0.38	0.56	0.72	1.35	1.39	0.77	1.09	1.02	0.61
RP0365	-0.64	0.65	0.23	1.17	1.25	1.15	-0.01	-0.09	-0.27	0.42	0.24	0.31	-1.79	-0.4	-0.8	-0.13	0	-0.24	0.74	0.47	0.71	0.08	0.35	0.33	-0.81	-0.27	-1	-1	-1.01	-0.13	0.45	0.64	0.35	0.37	0.35	0.33	0.08	0.83	0.2	-0.2	-0.43	0.49	-0.01	0.17	0.99	-0.46	1.04	0.35	0.51
RP0366	1.74	0.39	1.09	0.29	-0.34	0.06	2.55	1.94	2.53	2.2	1.66	2.23	2.3	1.44	2.01	1.14	0.73	1.15	0.78	1.74	0.59	1.03	0.23	0.73	1	1.05	-0.61	1	-0.91	0.47	0.99	0.49	-0.34	1	0.87	-0.39	0.93	0.2	-0.71	1	0.79	0.02	1.15	1.87	1.44	0.99	1.15	0.2	1.04
RP0367	1.49	0.55	1.12	1.43	0.18	1.06	1.61	0.92	1.38	1.9	1.12	1.82	1.12	0.78	0.98	1.36	0.92	1.41	2.09	1.72	1.47	0.99	1.08	1	1	1	1	1	-0.65	1.03	0.97	0.72	1.17	1	0.59	1.47	1.04	1.53	1.36	1	0.68	1.28	1.03	2.07	1.27	1.02	0.53	1.86	1.19
RP0368	2.35	1.74	1.2	0.53	0.86	0.69	2.62	1.59	1.73	1.89	1.55	1.71	2.54	1.78	1.66	1.87	1.66	1.62	1.75	1.51	1.57	0.26	0.71	0.66	1	1.04	1	1	-0.64	0.87	0.88	0.98	1.16	1	0.71	1.06	0.99	1.63	1.13	1	0.49	1.02	0.69	1.47	1.29	0.79	0.03	1.05	0.97
RP0369	2.43	1.59	2.49	1.54	2.17	2.6	1.61	1.41	1.76	1.28	1.44	1.58	1.46	1.81	2.15	1.13	1.77	1.58	1.71	1.29	1.01	0.3	0.92	0.78	1.01	0.78	1	1	0.3	0.16	1	1.15	1.16	1	1.01	1.21	1.03	1.03	0.98	1	0.82	0.93	0.86	1.46	1.48	1.02	1.01	1.06	1.08
RP0370	1.13	1.48	2.02	2.01	1.81	2.16	0.16	0.64	0.74	0.48	0.85	0.87	0.05	0.51	1.01	0.31	0.29	0.48	1.59	0.7	0.12	0.16	0.66	0.58	1	0.46	1	1	1.13	-0.82	1.12	0.88	1.03	1	1.23	-0.32	1.04	-0.04	1.18	1	1.06	-0.64	0.56	0.8	1.3	0.97	1.29	-0.36	0.79
RP0371	1.21	1.51	1.02	0.74	1.2	0.88	-0.05	0.17	0.26	0.01	0.35	0.34	0.24	0.45	0.2	0.27	0.46	0.25	1.34	0.63	0.9	0.92	0.95	0.91	-0.96	1.69	-1	-0.96	0.71	0.98	0.8	0.65	0.52	0.15	1.21	1.22	0.69	0.4	0.17	0.59	1.1	0.7	-0.08	1.66	1.09	0.45	1.4	1.22	0.95
RP0372	2.15	1.07	1.13	1.61	1.68	2	0.98	0.88	0.9	1.04	1.52	1.51	0.71	1.16	0.72	0.55	1.65	1.5	1.85	1.13	1.3	0.13	0.82	0.71	1.01	1.07	1	1	-0.87	0.94	0.9	0.58	0.91	1	0.33	1.02	1	1.41	1.35	1	0.44	0.97	0.66	1.81	1.25	0.89	0.15	1.03	1.04
RP0373	2.96	2.53	3.07	2.35	1.66	2.12	0.87	0.96	1.26	0.73	0.84	0.9	0.74	0.98	1.13	0.47	0.67	0.77	2.15	1.16	0.94	0.12	0.56	0.45	1.01	0.52	1	1	0.21	-0.37	1.06	1.19	1.22	1	1.03	0.77	1.04	0.42	0.81	1	0.96	0.14	0.68	1.11	1.24	1	0.32	0.05	0.83
RP0374	2.1	0.45	1.52	2.37	1.31	1.98	1.85	1.47	1.9	1.69	1.67	1.96	1.98	1.45	1.95	1.73	1.67	1.87	1.83	1.76	1.62	0.75	0.81	0.98	1	1.67	1	1	0.74	1.02	1.09	1.28	1.18	1	1.17	1.65	1.01	0.79	0.72	1	0.95	0.98	0.35	1.59	1.62	0.49	1.84	0.93	0.91
RP0375	2.76	2.32	1.98	1.96	2.14	1.63	1.87	1.65	1.53	1.45	1.58	1.53	1.86	1.57	1.3	1.29	1.53	1.25	2.21	1.43	1.35	0.98	1.41	1.07	0.99	1.73	1	1	1	1.05	1.13	1.02	0.97	1	1	1.69	1.01	1.11	1.13	1	1	1.31	0.99	2.29	1.07	1	1.91	1.11	1.35
RP0376	2.36	1.77	1.66	2.18	1.37	1.87	1.7	0.67	1.09	1.82	0.91	1.46	1.54	1.02	1.17	2.11	1.13	1.52	1.65	1.29	1.03	1	1.26	1.15	1.03	0.09	1	1	1	-1	1.17	0.8	1.18	1	1	-0.37	1.02	-0.48	0.87	1	1	-0.86	1	1.05	1.06	1.01	1.91	0.68	1.12
RP0377	0.84	1.75	0.04	-0.51	1.21	0.57	1.2	2.2	1.91	0.68	1.68	1.33	0.59	2.47	1.64	0.56	1.71	1.06	0.83	0.18	0.05	0.79	0.15	0.51	1.01	-0.26	-1.36	1	-0.45	-1	-0.37	0.36	-0.2	1	-1.11	-0.31	0.71	0.49	-0.82	1	-0.52	-0.65	0.71	0.7	1.49	0.79	0.78	-0.59	0.43
RP0378	1.18	1.85	0.96	0.89	1.82	1.23	0.78	1	0.7	0.74	0.8	0.69	0.64	1.44	1.47	1.8	1.15	0.94	1.85	1.07	1.17	1.03	1.01	1.1	1	1.2	1	1	0.12	0.99	1.05	0.97	0.9	1	1.05	0.76	1.03	1.35	1.21	1	0.7	1.04	1.13	1.79	1.89	1.01	0.9	1.27	1.09
RP0379	-0.71	0.04	0.29	-0.42	-0.02	-0.91	1.95	0.32	0.98	1.21	0.1	0.46	1.84	0.65	1.14	1.27	0.27	0.35	0.06	0.57	1.4	0	-0.46	0.1	-0.9	0.54	-1	-0.99	-0.77	0.74	0.19	0.25	-0.03	-0.36	0.65	0.48	-0.22	0.45	0.41	-0.32	-0.12	0.67	-0.09	0.1	1.69	0.03	-0.71	1.04	-0.55
RP0380	2.11	1.87	1.98	1.84	2.03	2.77	1.55	1.5	1.73	1.48	1.58	1.69	1.84	2.03	2.45	1.71	1.76	2.04	1.76	1.44	1.13	0.31	1.03	0.68	1	0.65	1	1	-0.05	0.4	1.09	1.06	1.23	1	1.15	1.26	1.05	1.35	1.26	1	1.1	1.08	0.75	1.58	1.24	1.02	0.99	0.98	1.13
RP0381	0.5	1.24	0.21	0.58	0.6	0.34	0.4	0.7	0.42	0.45	0.61	0.41	0.96	0.97	0.52	1.02	0.64	0.4	1.49	0.07	0.61	0.44	0.41	0.64	0.97	0.37	1	1	-0.72	-0.22	0.87	0.59	0.7	1	0.66	-0.61	0.95	0.18	1.26	1	0.24	-0.48	1.01	0.92	1.37	0.92	1.15	0.54	0.61
RP0382	1.91	0.89	1.26	0.37	0.91	0.88	1.48	1.44	1.76	1.07	1.55	1.58	1.12	1.14	1.36	-0.08	1.28	1.12	1.59	1.36	0.73	0.88	0.62	0.66	0.97	0.46	1	1	0.13	-0.1	0.94	0.85	0.44	1	0.73	0.84	0.81	0.2	0.84	1	0.53	0.62	0.8	0.49	1.34	0.87	1.34	0.71	1.02
RP0383	1.98	1.58	1.27	1.08	1.79	1.49	-0.06	0.52	-0.31	-0.55	0.17	-0.29	1.92	1.93	0.79	0.76	1.69	0.88	1.43	-1.06	0.73	0.29	0.14	0.41	-0.84	0.73	-1	-1	-0.96	0.79	0.01	0.12	-1	0.49	-0.8	-0.63	0.29	0.72	-0.29	0	-0.41	0.27	0.53	1.46	1.28	-0.07	1.03	1.12	0.12
RP0384	1.42	0.65	0.97	1.1	0.59	1.13	-0.11	0.91	0.63	0.19	1.01	1.23	0.82	0.29	0.87	0.49	0.85	1.07	1.08	0.33	0.31	0.79	0.17	0.7	0.98	0.56	-1.18	1	-0.36	-0.84	0.38	1.06	0.5	1	0.18	-0.05	0.92	1.27	-0.38	1	0.05	-0.36	0.78	1.1	1.07	0.75	1.86	-0.82	0.49
RP0385	1.23	0.88	1.09	0.7	0.33	0.78	1.93	1.17	1.6	1.09	0.88	1.22	1.45	1.1	1.45	1.16	0.86	1.11	1.08	1.25	1.14	1	1.23	1.01	1.02	0.8	-0.07	1	1	-0.81	1.06	1.37	1.21	1	1	1.49	0.97	1.23	1.05	1	1	1.04	1.05	1.64	0.99	1.04	2.12	0.2	1.26
RP0386	1.29	-0.28	-0.34	0.81	-1.18	-0.59	0.48	0.92	1.12	-1.22	-0.46	-0.84	0.28	0.15	0.37	-1.13	-0.78	-1.22	-0.1	-0.75	-0.89	-0.46	-0.15	-0.22	-0.91	-0.95	-1	-1	-0.8	-0.75	-0.4	-0.07	-1.02	-0.69	-0.59	-0.08	-0.06	-0.45	-0.82	-0.57	0.11	-0.51	-0.76	-0.02	0.91	-0.6	-0.49	-0.17	-0.15
RP0387	0.92	0.24	0.4	0.62	0.36	0.42	1.12	-0.66	-0.11	0.27	0.05	0.54	0.85	-0.76	-0.11	0.16	-0.34	0.01	1.71	-0.17	0.06	0.96	0.71	0.96	1.02	0.05	1	1	1	-0.99	1.06	0.93	0.55	1	1	-0.47	0.97	-0.41	1	1	1	-1.39	1.07	1.31	0.92	0.99	1	0.93	0.85
RP0388	1.72	0.66	1.25	1.05	-0.19	0.66	2.19	-1.3	1.04	0.79	-0.72	0.57	1.99	-0.27	1.56	1.03	-0.44	0.68	0.25	-0.2	0.03	0.89	0.31	0.89	0.94	0.13	-0.54	1	1	-1.03	0.9	1.06	1.19	1	1	-1.14	0.89	-0.25	0.71	1	1	-1.66	0.93	0.96	0.01	0.9	0.98	0.11	0.45
RP0389	1.6	0.24	0.71	1.17	-0.4	0.51	0.71	0.24	0.51	0.36	-0.59	0.05	1.01	0.03	0.41	0.68	-0.53	0.09	0.24	-1.31	-1.23	0.82	0.23	0.54	-0.06	-0.52	-1	1	0.57	-1	-0.41	-0.34	-1	1	-1.01	-1	-0.49	-0.8	-1	1	-0.45	-1	-0.18	0.55	1.86	0.82	1.65	0.01	-0.39
RP0390	0.92	2.3	-0.23	1.17	1.49	0.3	0.92	0.86	0.7	0.94	0.9	0.98	0.5	1.54	0.53	0.66	1.01	0.7	1.34	0.88	0.73	1.21	0.85	1.39	0.97	0.11	1	1	-0.94	-0.2	1	0.71	0.88	1	0.91	0.04	0.99	0.15	1.01	1	0.43	0.1	1.15	0.6	1.58	0.98	1.21	0.79	0.83
RP0391	1.75	1.97	2.08	0.95	1.02	1.07	1.04	0.81	0.57	0.25	-0.04	-0.28	1.5	1.1	1.56	0.56	0.37	0.05	0.91	-0.35	0	-0.34	-0.19	-0.52	-1.12	-0.27	-1	-0.99	-1.02	0.06	-0.12	-0.31	-0.42	-0.09	-0.47	-0.28	-0.68	-0.58	-0.5	-0.83	-0.76	0.36	0.04	1.23	1.21	0.17	1.04	0.79	-0.13
RP0392	1.27	1.86	2.01	-0.02	0.03	-0.13	0.15	0.01	-0.19	-0.38	-0.69	-0.7	1.06	0.76	0.81	0.33	0	0.02	1.45	-0.78	0.46	0.87	-0.17	0.73	0.83	0.45	1	1	-0.9	-0.47	0.41	0.62	-0.18	1	-0.16	-1.01	0.7	0.42	0.95	1	-0.62	-0.54	0.65	0.65	1.48	0.68	1.62	0.54	-0.01
RP0393	1.41	0.72	1.14	0.57	0.67	1.05	1.16	0.82	0.96	1.05	0.64	0.83	0.52	0.82	1.19	1.47	0.85	0.95	0.82	0.23	0.74	0.45	0	0.18	-1.18	-0.72	-1	-1	-1.06	-0.42	0.03	-0.19	0.12	0.14	-0.18	-0.46	-0.51	0.06	0.3	-0.74	-0.94	0.05	1.27	0.4	1.67	0.63	1.51	0.18	-0.11
RP0394	2.52	1.93	1.08	0.29	0.91	0.24	0.93	0.21	0.65	0.49	-0.06	-0.17	1.34	0.88	0.89	0.48	0.3	-0.17	1.97	0.48	0.64	0.28	0.68	0.54	1	1.24	1	1	0.33	1.03	0.85	0.89	0.63	1	0.22	0.78	0.98	1.01	1	1	0.3	0.82	0.72	1.9	1.26	1.03	0.93	1.7	0.91
RP0395	1.63	2.36	1.75	0.79	1.35	1.38	1.09	1.11	0.94	0.97	0.96	1.35	1.32	1.28	1.02	0.51	0.83	1.01	2.05	1.13	0.95	0.95	1.4	1.38	1.01	1.18	1	1	1	-0.03	1.15	0.86	0.3	1	1	-0.66	1.02	-0.05	0.77	1	1	-0.23	0.87	1.84	1.1	0.9	0.98	0.78	1.09
RP0396	2.35	2.37	2.42	0.74	2.81	2.03	2.05	2.06	2.14	1.34	1.7	1.7	2.29	2.42	2.63	1.05	2.07	1.77	1.54	1.22	1.1	0.25	1.04	0.72	0.99	0.26	1	1	0	-0.21	1.06	0.83	1.19	1	1.03	0.85	1.02	0.78	1.36	1	0.83	0.89	0.66	1.1	1.25	1.03	0.86	0.24	1.14
RP0397	1.02	1.43	2.11	-0.03	0.54	0.61	-1.16	0.84	-0.66	-1.08	0.25	-0.71	-0.69	1.14	0.23	-1.13	0.3	-0.72	0.13	-0.83	-1.24	0.51	0.24	0.46	1	-0.32	1	1	0.32	-1.04	0.58	0.33	0.48	1	-0.23	-0.82	0.84	-0.68	0.42	1	0.28	-1.19	0.87	-0.33	1.32	1	1.2	-0.15	0.36
RP0398	1.32	1.29	1.24	0.8	2.12	1.45	-0.3	0.58	0.28	-0.5	0.38	0.01	0.9	1.12	1.34	1.1	0.97	0.58	1.73	-0.61	0.14	0.92	0.65	0.81	0.99	0.03	1	1	-1	-0.39	0.52	-0.52	-0.16	1	-0.73	-0.49	0.74	-0.66	0.31	1	-0.36	-0.28	1.31	1.31	1.64	0.93	1.25	1	0.69
RP0399	-0.49	0.27	-0.15	-1.34	-0.97	-1.22	-0.01	0.05	-0.26	-0.53	-0.16	-0.32	-1.32	0.31	-0.66	-1.19	-0.57	-1.05	-0.55	0	-0.5	-0.76	-0.99	-0.79	-1.1	-1.78	-1	-1	-0.95	-0.98	-1.07	-1.16	-0.77	-0.89	-0.78	-1.09	-1.21	-1.44	-1.03	-1.13	-0.75	-0.97	-1.03	-1.49	-1.25	-1.28	-1.25	-0.9	-1.03
RP0400	1.84	0.89	1.3	0.54	1.29	0.49	1.31	0.02	0.42	-0.14	0.11	0.09	2.28	1.05	1.33	1.05	0.83	0.95	0.57	-0.87	0.12	-0.35	-0.18	-0.24	-1	-0.53	-1	-1	-1.01	-0.25	-0.47	0.03	-1.16	-0.71	-0.7	-0.08	-0.54	0.18	-0.69	-0.91	-0.68	0.23	-0.4	0.49	0.92	-0.53	0.91	-0.04	-0.25
RP0401	0.87	-0.46	-0.82	1.69	0.23	0.39	0.75	-0.03	0.19	0.6	0.49	0.59	0.27	-0.62	-1.03	0.54	0.21	0.44	0.97	0.7	1.08	-0.1	0.37	0.22	-0.74	0.58	-1	-1	-1.08	0.57	0.64	0.54	0.65	0.67	0.36	0.43	0.26	0.97	0.69	0.22	-0.58	0.44	0.5	1.1	1.42	-0.25	1.27	0.93	0.5
RP0402	1.45	2.07	1.31	1.01	1.52	1.45	0.6	0.95	0.85	0.47	0.82	0.71	1.1	1.68	1.67	1.03	1.98	1.56	1.32	0.39	0.86	-0.39	0.58	0.41	-1.21	0.08	-1	-1.02	-0.99	0.71	0.63	0.31	0.14	0.47	0.38	0.34	-0.12	0.56	1.25	-0.49	-0.63	0.84	-0.03	0.74	1.36	-0.2	2.04	-0.2	0.57
RP0403	1.44	1.5	0.87	0.87	0.61	1.16	0.85	0.8	0.87	0.68	0.67	0.81	1.21	1.17	1.4	0.87	1.06	1.26	1.15	0.33	1.04	-0.46	0.43	0.15	-0.92	-1	-1	-0.98	-1	0.63	0.52	0.31	0.05	0.41	0.28	0.26	-0.17	0.58	0.11	-0.24	-0.84	0.87	-0.07	1.26	1.32	-0.17	2.18	-0.46	0.42
RP0404	1.06	0.02	-1.05	-0.25	-0.5	-0.68	0.05	-0.52	-0.63	0.23	-0.12	0.2	0.2	-0.56	-0.97	0.08	-0.32	-0.36	1.04	-0.69	-0.26	0.25	-0.09	0.39	0.98	-0.54	1	1	-0.87	-0.92	0.36	0.42	-0.23	1	-0.28	-0.91	0.69	0.2	-0.11	1	-0.62	-0.78	0.69	0.19	1.29	0.78	1.07	0.44	0.27
RP0405	3.54	1.11	2.97	1.47	1.45	1.64	1.89	0.94	1.48	1.37	1.23	1.19	2.59	1.28	1.9	1.73	1.58	1.67	2.07	1.32	1.51	0.49	0.7	0.75	0.95	1.02	1	1	-0.93	0.69	0.95	1.05	0.99	1	0.84	0.99	0.97	1.9	1.31	1	0.31	0.9	0.83	1.44	1.44	0.84	1.11	1.1	0.9
RP0406	1.9	1.33	1.24	1.65	0.36	0.82	1.98	1.04	1.42	1.64	1.04	1.33	2	0.86	1.26	1.69	0.76	1.11	1.9	1.37	1.31	1.01	0.82	1.04	0.95	1.13	1	1	-0.41	0.66	1.01	1.03	1.22	1	0.97	1	0.99	1.99	1.33	1	0.55	0.72	1.11	1.5	1.45	0.93	1.31	1.24	0.98
RP0407	1.42	2.07	-0.02	1.42	2.09	1.44	0.98	0.52	0.42	0.83	0.72	0.8	1.46	1.29	0.67	1.72	1.46	1.57	2.62	0.33	0.93	0.93	0.77	0.85	0.99	1.02	1	1	-0.88	1.03	0.58	-0.18	0.25	1	-0.55	0.48	0.75	0.32	1.29	1	-0.5	0.67	0.93	1.74	1.64	0.94	1.06	1.94	0.76
RP0408	0.01	-0.14	-0.44	-0.19	-0.99	-0.92	-0.09	-0.7	-0.98	-0.2	-0.87	-0.79	-0.36	-0.49	-0.87	0.11	-1.22	-0.94	0.44	-0.78	-0.03	-0.54	-0.67	-0.9	-1.12	0.19	-1	-1	-0.99	0.52	-0.47	-0.12	-0.7	-0.58	-0.29	-0.73	-0.67	0.19	-0.48	-0.9	-0.48	0.01	-0.38	0.59	1.36	-0.48	1.31	0.8	-0.71
RP0409	1	2.08	1.51	-0.42	1.01	0.84	-0.05	0.79	0.43	-0.69	0.5	0.15	-0.06	0.98	0.17	-0.85	0.64	-0.31	-0.3	-1.16	-1.05	-0.35	-0.5	-0.47	-1.14	-1.29	-1	-1	-0.98	-0.56	-1.5	-0.82	-1.88	-1.65	-0.93	-0.33	-1.24	-0.8	-1.63	-1.24	-0.46	-0.46	-0.57	-0.11	0.9	-0.75	-0.35	0.18	-1.05
RP0410	1.69	0.06	0.01	0.91	0.19	0.4	1.09	0.58	0.92	0.5	0.34	0.48	0.93	-0.25	0.05	0.41	0.01	0.08	1.26	0.25	0.49	-0.16	0.45	0.45	-0.79	0.31	-1	-0.96	-1.02	0.67	0.39	0.03	0.01	0.11	-0.04	0.65	-0.21	-0.18	-0.45	-0.59	-0.3	0.83	-0.02	1.19	1.2	0.21	1.15	0.89	0.5
RP0411	1.24	2.22	2.08	1.78	1.07	1.77	0.98	0.12	0.08	0.95	0.01	0.33	0.93	0.4	0.1	1.39	-0.09	0.53	1.32	0.08	0.55	0.93	0.17	0.62	0.77	-0.17	1	1	-1	-0.99	-0.15	-0.57	0.61	1	-1.06	-0.6	0.55	-0.54	1.15	1	-0.9	-0.86	0.85	0.75	1.65	0.78	1.78	0.33	0.24
RP0412	0.75	0.31	-0.1	0.08	-0.3	-0.23	0.97	0.7	0.95	1	0.78	1.22	0.95	0.91	1.09	1	0.74	0.95	0.24	0.69	0.45	1.01	1.31	1.3	0.68	-0.14	-0.84	1	1	-1	0.95	0.6	-0.65	1	1	-1	0.77	-0.45	-1	1	1	-1	0.53	1.26	-0.44	1.02	1.92	-0.58	0.84
RP0413	2.28	2.45	2.73	1.78	2.74	2.17	-1.04	0.58	0.25	-0.34	0.67	0.52	-0.14	0.92	1.05	0.09	0.97	0.63	2.38	0.91	1.09	1.03	0.85	1.06	1	0.53	1	1	-0.23	0	1.02	1.17	1.24	1	1.01	0.58	1	1.22	1.12	1	0.92	0.64	1.19	1.54	1.52	1.02	1.68	0.92	0.96
RP0414	0.79	1.43	-0.02	0.49	-0.37	-0.31	0.23	0.29	0.2	0.22	-0.12	0.43	0.84	0.61	0.5	0.31	-0.08	-0.02	0.07	-0.27	-0.41	-0.6	0.03	-0.33	-0.97	-0.5	-1	-1	-0.08	-0.64	0.53	0.85	-0.32	0.1	0.87	0.05	0.18	0.79	-0.24	-0.28	0.56	-0.02	-0.81	0.04	1.31	-0.65	0.8	-0.94	0.26
RP0415	1.88	1.73	1.09	1.1	2.02	1.53	0.87	1.11	0.97	0.99	1.27	1.24	1.46	1.73	1.45	1.2	1.43	1.34	2.27	1.26	1.2	1.02	0.92	1.13	0.99	1.04	1	1	-0.5	0.88	1.11	0.91	1.06	1	1.15	0.51	1.04	0.92	1.24	1	0.96	0.68	1.1	1.59	1.43	0.96	1.19	1.27	0.99
RP0416	1.87	2.58	2.41	1.97	3.87	3.28	1.43	1.65	1.52	1.47	1.68	1.72	0.93	1.66	1.16	0.75	1.84	1.43	2.33	1.49	0.95	1.03	0.69	1.08	1	1	1	1	-0.7	0.94	1.07	0.65	0.19	1	1.1	-0.27	1.03	0.48	0.78	1	0.86	0.64	1.16	1.92	1.39	1	1.12	1.97	1.15
RP0417	1.89	0.52	0.76	1.01	-0.07	0.28	0.9	-0.36	-0.04	0.01	-0.19	-0.11	0.71	-0.6	-0.25	-0.31	-0.29	-0.46	0.79	-0.39	-0.37	0.08	-0.39	0.02	1	-0.69	1	1	-0.56	-1.07	0.24	-0.08	0.96	1	-0.34	-1.3	0.88	-0.75	0.71	1	-0.07	-1.66	0.61	0.01	1.38	0.81	-0.08	-0.51	0.06
RP0418	1.68	1.86	1.83	1.89	1.25	1.64	2.48	1.27	1.91	2.15	1.07	1.65	2.2	1.66	2.04	2.39	1.13	1.56	1.68	0.85	0.75	0.96	0.99	0.98	0.87	1.73	1	1	1	0.97	0.91	1.2	0.88	1	1	0.75	0.89	2.47	1.09	1	1	0.86	0.92	2.1	1.41	0.99	1	1.24	1.04
RP0419	1.79	1.83	2.25	0.74	1.38	1.15	1.77	1.04	1.47	1.52	1.2	1.4	1.69	0.88	1.21	1.2	1.23	1.29	1.02	0.96	1.32	0.59	0.66	0.69	-0.8	-0.72	-1	-0.99	-1.01	0.23	0.83	0.37	0.77	0.7	0.65	0.27	0.42	0.67	0.58	0.28	-0.02	0.76	0.9	0.51	1.51	0.33	1.32	0.69	0.74
RP0420	0.48	1.1	0.49	-0.24	0.67	0.06	-0.74	0.46	-0.15	-1.71	-0.03	-0.67	0.15	0.79	0.24	-1.06	0.34	-0.43	0.61	-1.19	-0.94	-0.38	-1.14	-0.85	-0.87	-1.34	-1.14	-1	-0.86	-0.98	-2.27	-1.86	-1.67	-1.58	-1.29	-1.63	-1.42	-1.49	-0.22	-1.22	-0.89	-1.41	-1.01	-0.44	-1.13	-0.87	-0.78	-0.79	-1.95
RP0421	2.26	2.75	3.55	1.71	2.68	2.45	1.43	1.15	1.51	0.72	0.73	1.04	2.78	2.31	2.85	2.11	1.77	1.98	1.81	0.48	1.65	0.86	0.57	0.73	-0.84	0.57	-1	-1	-0.99	0.82	-0.04	-0.63	-0.44	0.48	-1.05	0.77	0.18	0.2	0.36	0.25	-0.74	1.1	0.35	1.61	1.2	-0.37	1.34	1.21	0.25
RP0422	1.48	2.02	2.46	1.45	3.35	2.85	1.33	1.78	1.62	1.48	1.81	1.67	1.3	2	2.22	1.21	1.99	1.63	1.64	1.54	1.29	1.02	0.95	1.02	0.99	-0.07	1	1	-0.88	-0.24	1.12	0.89	1.05	1	1.1	0.39	1.05	0.76	1.14	1	1.05	0.73	1.11	1.15	1.95	1.02	1.06	0.79	1.15
RP0423	1.8	-0.69	0.85	1.04	-1.75	-0.78	2.17	0.86	1.62	1.85	0.56	1.07	2.07	-0.08	0.91	1.24	-0.7	-0.08	0.22	0.83	0.15	-0.12	-0.17	0.09	-1.16	-0.82	-1	-1	-1.04	0.03	0.42	-0.06	-0.68	0.05	0.53	-0.53	0.07	-0.47	-0.72	-0.13	0.2	-0.18	-0.28	0.09	1.14	-0.56	1.07	0.63	0.48
RP0424	0.74	1.88	1.23	0.91	0.89	0.47	-0.4	2.39	1.04	0.23	1.27	0.97	-0.06	2.45	0.84	0.2	1.15	0.57	0.94	0.36	0.21	0.92	0.43	0.77	-0.83	-0.02	-1	-1	-0.78	0.17	0.33	0.46	-0.27	0.04	0.27	0.4	0.42	-0.08	0.03	0.14	0.5	-0.13	0.62	0.01	1.77	0.13	0.73	1.05	0.32
RP0425	2.03	2.7	2.58	2.7	1.96	2.41	2.33	1.23	1.47	2.29	1.41	1.88	2.44	1.36	1.61	2.3	1.28	1.74	1.78	1.66	1.28	1.03	1.02	0.94	0.8	1.61	1	1	1	0.65	1.14	1.25	1.23	1	1	1.17	1.01	0.5	0.95	1	1	0.46	0.91	2.04	1.05	1.01	1.93	1.21	1.23
RP0426	0.25	0.92	0.21	0.65	0.18	0.39	1.27	1.65	1.65	1.01	1.29	1.39	0.88	1.48	1.33	0.58	0.98	0.93	1.74	1.26	1.02	0.85	0.74	0.84	0.94	-0.06	1	1	-0.94	-0.22	0.79	0.58	1.19	1	0.43	0.57	1.02	-0.02	1.36	1	0.75	-0.05	0.74	0.22	1.45	0.84	1.19	0.66	0.96
RP0427	0.87	0.06	-0.27	0.71	0.05	-0.85	1.81	0.47	1.12	1.46	0.59	1.08	1.95	-0.02	0.55	1.06	-0.04	0.15	-0.75	0.83	0.85	-0.43	0.08	-0.25	-1.31	0.32	-1	-1	-1.1	-0.63	0.53	0.7	0.72	0.65	0.41	0.44	0.32	0.91	0.65	0.28	-0.06	0.09	-1	0.4	1.65	-0.54	-0.99	0.99	0.27
RP0428	1.08	1.36	-0.1	0.12	0.87	0.04	0.21	0.08	-0.55	-0.53	-0.36	-0.58	0.18	0.58	-0.45	0.18	0.12	-0.03	0.38	-0.96	-0.36	-0.65	-0.88	-1.26	-1.06	-1.1	-1	-1	-1.02	-0.59	-0.45	-0.11	-0.7	-0.2	-0.62	-0.94	-0.95	-0.26	-0.76	-1.1	-0.88	-0.34	0.01	0.31	1.21	-0.54	1.12	0.22	-0.69
RP0429	1.1	1.55	1.08	1.5	0.69	0.03	0.8	0.32	0.27	0.59	0.18	0.39	0.93	0.06	-0.26	0.58	-0.3	-0.28	1.14	0.31	0.66	0.64	0.06	0.15	-0.95	0.16	-1	-0.99	-1.04	0.24	0.45	0.32	0.46	0.41	0.33	-0.2	-0.28	0.26	-0.29	-0.55	-0.4	0.07	1.12	1.25	1.85	0.74	1.65	0.95	0.17
RP0430	1.78	1.61	1.09	1.34	0.98	0.64	1.36	0.74	0.88	1.07	0.53	0.83	1.31	1.11	0.83	1.58	0.92	0.96	1.7	0.39	1.27	0.35	0.44	0.32	-1.32	0.17	-1	-1.02	-1.02	0.63	0.59	0.07	0.25	0.75	0.03	0.26	0.19	0.39	0.85	0.24	-0.38	0.7	1.12	1.48	1.57	0.97	1.42	1.11	0.47
RP0431	-0.02	0.47	-0.04	-0.15	0.6	0.39	0.93	1.05	1.26	1.04	1.28	1.64	0.49	0.72	0.72	0.63	0.92	1.02	1.21	1.14	0.9	1.03	1.15	1.18	0.99	0.04	1	1	1	-0.99	1.17	0.76	1	1	1	-0.82	1.02	-0.5	0.68	1	1	-1.02	1.02	0.91	1.05	1.01	1.93	0.58	1.03
RP0432	1.44	1.39	0.02	0.51	0.47	-0.07	-0.22	0.63	0.04	0.13	0.82	0.36	0.25	0.78	0.05	-0.11	0.73	0.32	0.79	0.44	0.43	1.03	0.85	1.07	0.98	-0.46	1	1	-0.95	-0.69	0.75	0.27	0.45	1	0.15	0.2	0.75	0	1.03	1	-0.16	0.28	1.69	0.39	1.4	0.99	1.21	0.6	0.81
RP0433	1.72	0.42	0.33	1.94	0.57	1.44	1.99	1.53	1.78	1.97	1.63	1.96	1.77	1.45	1.45	1.8	1.5	1.66	2.02	1.91	1.51	1	0.88	0.94	1.02	1.08	1	1	-0.2	1	1.14	1.13	0.85	1	1.14	1.18	1.04	1.18	0.52	1	1.16	1.24	1.15	1.85	1.28	1.01	0.76	1.23	1.2
RP0434	2.84	2.68	3.37	2.88	2.04	2.46	2.16	1.04	1.43	1.89	1.05	1.47	2.24	1.03	1.77	1.92	0.71	1.37	2.17	1.26	0.95	1	1.06	1.11	1	0.37	0.98	1	-0.51	-0.76	1.1	1.06	1.22	1	0.96	0.58	1.04	0.51	1.04	1	0.78	0.11	1.03	0.86	1.46	0.92	2.04	0.5	1.1
RP0435	1.85	2.54	2.42	1.34	0.71	1.17	0.16	0.57	0.53	0.55	0.12	0.24	0.58	1.01	1.39	0.88	0.19	0.57	1.51	-0.03	0.67	0.14	0.4	0.52	0.97	0.34	1	1	-0.95	-0.05	0.46	0.28	0.09	1	-0.58	0.09	0.78	0.63	0.75	1	-0.5	0.35	0.55	0.99	1.47	0.68	0.08	0.49	0.62
RP0436	1.56	1.65	1.81	0.62	0.66	0.92	1.29	1.43	1.74	0.41	0.63	0.92	1.59	1.83	2.01	0.83	0.84	1.02	1.96	0.9	0.87	0.99	0.97	0.99	1.02	1.45	0.09	1	1	0.12	0.92	1.27	1.16	1	1	1.16	0.92	2.21	1.1	1	1	1.19	1.01	2.02	0.7	1.03	1.01	0.21	1.04
RP0437	1.07	0.6	0.25	-0.07	-0.13	-0.36	0.49	0.6	0.75	0.69	0.33	0.67	0.51	0.24	-0.15	0.49	-0.03	-0.05	0.59	-0.28	-0.61	-0.34	-0.63	-0.49	0.97	0.54	-1.51	1	0.74	-1.08	-0.02	1.09	-0.21	1	-1	-0.28	0.88	1.05	-0.08	1	-0.45	-0.67	0.11	0.89	0.67	0.52	-0.19	-0.88	0.12
RP0438	1.3	1.9	2.2	1.34	1.58	0.88	1.09	1.41	1.25	0.95	0.98	1	1	1.66	1.22	1.11	0.93	0.82	1.23	1.13	1.18	0.4	0.73	0.69	-0.83	0.42	-1	-1	-0.82	0.81	0.84	0.92	0.65	0.5	0.95	1.05	0.45	1.36	0.13	0.03	0.52	1.02	0.81	1.12	1.47	0.13	1.07	1.12	0.75
RP0439	1.23	3	1.98	1.24	1.98	1.52	1.17	1.52	1.6	0.39	0.86	0.73	1.03	2.52	2.23	0.75	1.84	1.35	1.66	0.18	0.94	0.92	0.5	0.8	-1.06	-0.49	1	-0.55	-0.65	0.23	0.27	0.44	0.83	0.46	0.18	0.2	0.05	0.33	0.8	0.29	0.37	0.44	0	0.34	1.64	0.67	0.65	1.39	0.49
RP0440	1.09	2.35	2.7	2.07	1.32	1.49	0.96	0.68	0.42	0.25	0.11	0.02	0.49	0.8	0.2	-0.29	0.1	-0.13	1.14	-0.33	0.25	-0.66	-0.56	-0.49	0.53	0.33	1	1	-1.01	-1.27	0.37	0.78	0.68	1	-0.02	-0.7	0.42	1.27	0.82	1	-1.11	-0.34	-0.64	-0.04	1.49	-0.09	-1.01	0.04	-0.07
RP0441	2.41	2.53	2.33	1.75	1.74	1.45	2.67	3.11	2.67	1.91	1.43	1.65	2.19	3.02	2.33	1.36	1.28	1.45	1.87	1.37	1.07	1.01	0.49	1	0.96	-0.34	0.98	1	-1.36	-0.99	0.81	0.59	1.01	1	0.33	0.08	0.98	-0.09	0.7	1	0.25	-0.47	1.16	0.36	1.29	0.94	2.07	0.44	0.58
RP0442	1	2.58	1.88	0.76	1.89	1.86	0.25	1.38	0.78	-0.39	0.48	-0.1	0.34	2.29	1.59	-0.05	1.09	0.24	-0.28	-0.64	-0.52	-0.78	-0.29	-0.38	-0.85	-0.86	-1	-1	-0.78	-0.59	0.12	0.2	-0.24	0.07	-0.12	-0.62	0.08	-0.3	0.37	-0.19	-0.33	-0.51	-0.74	-0.16	0.92	-0.81	0.96	-0.67	-0.03
RP0443	1.82	1.6	1.22	-0.43	0.83	-0.08	0.14	0.41	-0.11	-0.3	-0.39	-0.64	0.61	0.83	0.41	-0.71	-0.17	-0.84	-0.74	-1.05	-1.08	-0.5	-0.62	-0.57	-0.8	-1.23	-1	-1	-0.92	-1.05	0.14	0.54	-0.33	0.04	-0.01	-0.71	0.21	-0.3	-0.48	-0.17	-0.14	-1.06	0.07	-0.68	1.31	-0.56	1.17	-0.96	-0.27
RP0444	2.19	1.38	2.3	1.38	1.27	1.43	0.89	1.15	1.04	1.34	1.48	1.65	1.77	1.26	1.24	1.18	1.54	1.43	1.87	1.37	1.37	1	1.19	0.94	0.96	1	1	1	-0.46	1.05	0.83	0.35	0.22	1	-0.14	1.8	0.82	0.82	0.84	1	0.69	1.57	0.9	2.13	1.25	1.04	0.37	1.04	1.08
RP0445	1.64	0.46	0.06	0.52	0.05	-1	1.55	1.13	1.19	1.63	1.15	1.25	0.79	-0.47	-0.52	0.38	-0.54	-0.64	1.17	1.33	-0.34	-1.26	-0.54	-0.55	-0.74	0.58	-1	-1	-1.02	0.29	0.66	0.26	-0.41	0.27	0.7	-1.07	0.37	-0.53	0.03	-0.01	0.39	-0.99	-0.9	0.48	0.77	-0.8	-0.79	0.24	0.4
RP0446	0.37	-0.64	-0.6	-0.76	-1.16	-0.92	-1.06	-1.67	-2.14	-1.52	-1.78	-1.98	0.15	-0.98	-1.24	-0.68	-1.24	-1.47	-0.72	-1.59	-1.22	-0.98	-1.94	-1.26	-1.06	-1.64	-1	-1	-1.07	-1.28	-1.8	-0.66	-1.79	-1.61	-1.07	-1.8	-0.85	-1.12	-1.38	-0.99	-0.81	-1.7	-0.53	-1.71	1.08	-0.8	-0.72	-1.04	-2.05
RP0447	2.02	2.73	2.11	0.73	3.19	2.01	1.24	2.1	1.86	0.53	1.46	1.08	1.42	2.45	1.98	0.56	1.81	1.15	1.67	1.03	1.06	0.27	0.6	0.52	1.01	0.57	1	1	-0.88	0.42	0.92	0.74	1.07	1	0.73	0.49	1.03	0.5	0.93	1	0.79	0.46	0.91	1.51	1.55	1.01	0.83	0.74	0.86
RP0448	1.71	2.07	1.87	1.64	1.58	2.13	1.1	1.38	1.47	1	1.22	1.12	1.79	1.33	1.87	1.74	1.75	1.97	1.41	1.22	1.15	-0.14	0.84	0.43	-0.95	0	-1	-0.98	-0.99	0.78	0.77	0.54	0.59	0.43	0.72	1.45	-0.05	0.44	0.06	-0.34	-0.57	1.02	0.24	1.61	1.32	0.47	1.28	0.97	0.85
RP0449	2.38	1.59	1.71	1.46	1.24	1.33	2.62	1.7	1.69	1.73	1.79	1.77	2.78	1.76	1.77	1.61	1.84	1.55	1.99	2.19	1.91	0.83	1.04	0.93	0.97	1.59	1	1	0.95	1.05	1.07	1.33	1.22	1	1.18	2.19	1.03	1.82	0.9	1	1.02	1.74	0.72	1.71	1.63	0.8	1.45	1.13	1.16
RP0450	2.32	0.98	1.24	1.66	0.86	1.38	2.88	0.33	1.53	1.94	0.37	1.13	2.51	0.39	1.19	1.91	0.46	1.21	1.68	0.35	0.57	0.98	1.03	0.99	1.02	0.45	1	1	1	-0.92	1.07	1.18	0.55	1	1	0.34	1	0.17	1	1	1	-0.11	1.07	1.42	1	1.01	2.12	0.5	1.11
RP0451	1.13	1.67	0.67	0.37	0.4	0.21	-0.09	0.3	-0.62	-0.69	-0.34	-0.6	0.55	0.83	-0.05	-0.14	-0.22	-0.51	0.41	-1.16	-1.13	-0.64	-1.05	-0.81	-0.85	-1	-1.01	-1	-0.94	-1.18	-1.16	-0.89	-1.43	-0.65	-1.25	-1.23	-0.35	-0.98	-1.24	-0.59	-0.77	-1.29	-0.87	-0.18	0.83	-0.74	-0.82	-0.79	-1.01
RP0452	1.68	1.89	1.59	1.33	1.63	1.81	0.85	1.05	1.09	0.64	0.82	0.81	1.12	1.79	2.03	0.78	1.58	1.54	2.06	0.55	0.99	0.16	0.45	0.19	-1.32	-1	-1	-1.03	-1	0.38	0.64	0.48	0.4	0.6	0.37	0.36	-0.33	0.3	-0.21	-0.61	-0.76	0.73	0.76	2.4	1.56	1.01	1.89	1.08	0.61
RP0453	0.78	1.94	1.18	0.78	1.31	1.25	1.76	1.32	1.98	1.42	1.01	1.62	0.77	1.46	1.52	1	1.04	1.41	1.31	0.58	0.71	0.98	1.03	0.99	1.02	0.59	1	1	1	-0.82	1.06	1.23	0.85	1	1	0.55	0.97	0.33	1.09	1	1	0.09	1.07	0.89	1.01	1.02	2.12	0.53	1.11
RP0454	2.07	0	-0.16	1.75	1.43	1.39	0.72	0.9	0.88	0.94	1.06	1.2	0.83	0.26	0.45	0.76	0.74	0.79	1.95	1.5	1.27	1.03	1.05	1.05	1	1.5	1	1	0.92	1.02	1.14	1.17	1.23	1	1.19	1.2	1.03	0.3	0.84	1	1.11	0.46	1.07	1.92	1.38	1.01	1.43	1.25	1.08
RP0455	1.69	1.52	0.93	1.15	0.94	0.85	1.87	1.4	1.55	1.34	0.92	1.04	2.05	1.94	2.26	1.14	1.39	1.25	1.18	1.01	1.43	-0.03	0.74	0.8	-1.15	0.91	-1	-1.01	-1.02	0.81	0.79	0.59	0.68	0.52	0.82	0.64	0.3	0.8	0.49	0.24	0	0.89	0.32	1.1	1.26	0.52	1.04	1.02	0.74
RP0456	2.31	2.21	2.26	1.12	1.74	1.16	0.91	1.27	1.59	0.11	0.58	0.52	2	2.4	2.21	1.2	1.36	0.94	0.53	-0.6	0.1	0.88	0.14	0.59	-0.85	-0.97	-1.01	-1	-0.91	-0.97	-0.35	0.09	-0.6	0.06	-1.04	-0.43	-0.01	-0.03	0.22	-0.32	-0.77	-0.43	0.31	0.16	1.38	-0.22	1.15	-0.3	0.22
RP0457	0.8	-0.75	-0.47	1.14	-1.11	0.12	0.7	-0.54	-0.48	-0.21	-0.83	-0.38	0.89	-1.46	-0.99	-0.2	-1.74	-1.08	0.98	-0.9	-1.08	-0.1	-0.05	-0.03	-0.83	-0.73	-0.98	-1	-0.98	-1.02	-0.07	0.09	-1.18	-0.65	0.16	-0.68	-0.31	-0.22	-0.6	-0.89	-0.03	-0.75	0.11	-0.42	1.51	-0.13	0.96	-1.59	-0.24
RP0458	1.23	2.44	1.16	1.88	2.86	1.91	0.85	0.78	0.65	0.84	0.89	0.9	0.58	0.91	0.46	1.02	1.24	0.98	3.06	0.88	1.36	0.49	1.01	1	-1.01	1.08	-1	-1	-1	0.78	0.96	0.39	0.65	0.9	0.82	0.2	0.64	0.64	1.05	0.69	0.08	0.94	0.9	2.8	1.51	0.28	1.87	1.15	0.93
RP0459	0.4	0.28	0.73	0.03	-0.64	-0.06	-1.15	0.95	0.7	-1.34	-0.06	0.2	-1.3	0.57	1.27	-1.21	0.09	0.35	0.12	-1.36	-0.66	-1.07	-2.37	-1.96	-1.09	-0.97	-1.19	-0.75	-0.74	-1.04	-3.16	-1.05	0.02	-2.35	-1.13	-1.56	-1.78	-1.05	-0.74	-1.5	-0.81	-1.78	-1.81	-0.27	-0.51	-0.68	-1.59	-0.8	-2.41
RP0460	1.03	1.5	1.14	0.78	0.91	1.33	0.66	-0.33	0.67	0.78	-0.65	0.44	0.72	0.31	0.83	0.97	-0.16	0.57	1.11	-0.19	-0.06	0.96	0.99	0.75	-0.01	-0.13	-1	1	-1	-1	-0.25	-1.9	-1	1	-1.1	-1	-0.37	-0.63	-1	1	-1.29	-1	-0.09	1.11	1.97	0.97	1.55	0.2	0.09
RP0461	1.35	1.92	2.03	1.29	1.45	1.01	0.88	1.64	1.43	0.77	1.15	1.13	1.38	1.72	1.99	1.16	1.02	0.82	1.2	0.98	0.78	0.05	0.52	0.5	-0.85	0.72	-1	-1	-1.02	0.5	0.77	0.66	0.6	0.49	0.75	0.5	0.36	0.89	0.08	0	0.28	0.29	0.4	1.17	1.43	-0.15	1.12	0.98	0.58
RP0462	0.35	1.48	0.65	0.24	0.19	-0.27	0.83	2.16	1.3	0.55	0.97	0.83	-0.42	2.4	0.8	0.66	1.14	0.49	0.3	0.16	0.06	-0.64	-0.43	-0.58	-0.79	-0.16	-1.16	-1	-0.97	-0.44	-0.27	-0.08	-0.58	-0.21	-0.53	-0.11	-0.4	0.1	-1.1	-0.57	-1.07	-0.09	-0.39	0.77	0.77	-0.66	-0.81	-0.71	-0.3
RP0463	0.53	1.71	1.83	0.24	1.61	0.89	0.79	0.9	1.21	0.4	1.01	1.19	0.13	1.45	1.48	0.62	1.74	1.83	1.53	0.04	0.95	1.02	0.42	0.92	0.96	0.79	1	1	-0.36	0.2	0.58	0.71	0.41	1	0.01	-0.12	0.85	1.06	1.12	1	-0.18	0.25	1.23	1.3	1.42	0.97	1.29	1.07	0.66
RP0464	0.96	2.48	1.52	0.43	0.88	0.48	0.51	1.52	1.3	-0.3	0.25	0.06	1.52	2.19	1.96	0.36	0.97	0.91	0.23	-0.69	-0.03	-0.65	-0.01	-0.11	-0.84	-0.1	-1	-1	-0.73	0.06	-0.06	0.56	-1.09	-0.71	0.3	0.13	-0.44	0.78	-1.14	-1.02	-0.18	0.46	-0.53	-0.18	0.94	-0.76	1.06	0.14	-0.05
RP0465	1.75	1.4	2.08	1.27	0.49	0.94	1.54	0.5	0.92	1.31	0.35	0.84	1.59	0.1	0.76	0.94	-0.3	0.17	0.66	0.43	0.32	0.34	0.72	0.64	-0.91	0.51	-1	-1	-0.09	0.87	0.45	0.68	-0.5	-0.49	1	0.78	-0.2	0.75	-1.09	-0.82	0.63	0.76	0.39	1.01	1.43	0.04	1.03	1.09	0.37
RP0466	0.78	2.77	1.96	1.22	2.35	2.98	0.14	1.65	1.23	0.33	1.24	0.99	-0.38	2.33	1.78	0.42	1.76	1.45	0.6	0.29	-0.05	-0.2	0.27	0.08	-0.87	0.17	-1	-1	-0.76	0.33	0.58	0.66	0.02	0.3	0.6	0.19	0.12	0.44	-0.48	-0.4	0.25	0.36	0.08	0.76	1.24	-0.35	0.98	0.71	0.56
RP0467	1.01	1.98	0.88	1.12	1.96	1.57	0.09	1.23	0.06	-0.28	0.12	-0.27	0.49	1.62	0.02	0.1	0.57	-0.25	0.45	0.23	0.38	-0.04	0.24	0.19	-1.19	-0.42	-1	-1	-0.91	0.02	0.09	0.21	0.1	0.12	-0.29	0.39	0.1	0.42	-0.12	-0.28	0.09	0.41	-0.52	0.46	0.96	-0.48	-0.21	0.37	0.28
RP0468	1.41	2.07	1.74	0.86	2.27	2.17	1.71	1.13	1.25	1.31	0.87	1.06	2.03	1.65	1.92	1.27	1.28	1.36	0.5	0.53	0.82	0.21	0.45	0.19	-1.08	-0.55	-1	-1	-1.04	-0.44	0.61	0.43	0.51	0.61	0.4	0.12	-0.11	0.71	0.92	-0.41	-0.5	0.37	1.01	0.74	1.54	0.28	1.26	0.33	0.57
RP0469	1.29	1.86	0.63	0.5	1.22	0.15	0.9	1.85	1.7	0.8	1.35	1.23	0.08	1.93	1.4	0.42	1.16	0.67	1.6	1.29	1.1	1.03	1.12	1.17	1	0.63	1	1	0.42	-0.01	1.13	1.07	1.21	1	1.17	0.85	1.04	0.68	1.08	1	1.14	0.68	1.11	1.34	1.28	1.02	1.23	0.9	1.11
RP0470	1.77	1.48	2.02	1.48	0.95	1.03	0.73	1.79	2.12	1.25	1.49	1.77	0.68	2.02	2.18	1.3	1.58	1.61	1.94	1.28	1.32	1	1.05	0.92	0.99	1.15	1	1	0.1	1.05	0.84	0.68	0.22	1	0.08	1.74	0.84	0.98	0.84	1	0.68	1.51	0.94	1.95	1.26	1.03	1.15	1.1	1
RP0471	1.17	-0.03	0.87	0.22	-0.03	0.25	0.24	-0.67	0.26	0	0.32	0.43	0.05	-0.25	0.62	0.45	0.49	0.72	1.24	0.19	0.18	0.96	0.74	0.96	0.87	1.42	-0.75	1	1	-0.38	0.84	1.33	0.95	1	1	0.79	0.86	2	0.32	1	1	0.42	0.92	1.88	0.14	0.98	1	-0.54	0.8
RP0472	0.76	-0.51	0.16	1.19	-0.37	0.84	0.01	-0.65	-0.61	0.87	-0.17	0.7	-0.16	-1.07	-0.81	0.88	-0.62	0.39	0.13	-0.11	-0.24	-0.39	-0.51	-0.29	-0.82	-0.51	-1	-1	-0.92	-0.38	-0.44	-0.06	-0.96	-0.42	-0.66	-0.22	-0.02	-0.34	-0.23	-0.33	-0.21	-0.48	-0.72	0.23	0.79	-0.83	-0.52	-0.12	-0.22
RP0473	1.87	1.09	1.7	1.46	1.13	0.79	1.93	0.46	1.15	2.26	0.57	1.4	2.19	1.57	2.33	2.38	1.2	1.89	1.57	0.61	1.51	-0.23	0.13	0.25	-0.76	0.77	-1	-1	-1.02	0.78	-0.02	0.55	0.16	0.48	-0.57	0.33	0.06	1.28	-0.17	0.01	-0.89	0.58	0.07	1.42	1.05	-0.58	0.37	0.91	0.38
RP0474	1.71	2.62	2.73	1.49	1.86	2.06	1.68	1.48	1.66	1.42	1.22	1.53	1.14	1.55	1.98	1.2	1.11	1.24	1.48	1.38	1.18	0.86	0.81	0.9	0.99	0.13	1	1	-0.92	-0.26	0.81	0.91	1.12	1	0.5	0.81	0.99	1.11	1.33	1	0.38	0.7	0.91	1.04	1.34	0.85	0.79	1.06	1.06
RP0475	2.33	1.51	1.14	1.41	1.59	0.96	2.59	1.08	1.5	2.04	1.31	1.8	2.53	1.26	1.29	1.69	1.41	1.35	2.09	1.68	1.55	0.99	1.26	1.09	1	1.97	1	1	-1	1.04	1.09	0.64	0.75	1	0.88	1.41	0.99	0.83	0.43	1	1.1	1.43	1.05	2.99	1.3	1	1.71	1.16	1.2
RP0476	1.4	0.86	0.62	0.79	0.92	-0.32	0.71	0.54	0.72	0.41	0.45	0.41	0.88	0.43	0.64	0.77	0.14	0.02	0.74	0.19	0.5	-0.68	-0.02	-0.55	-1.02	0.32	-1	-1	-1.09	0.68	0.46	0.4	0.06	0.12	0.56	0.05	-0.2	0.37	-0.12	-0.54	-0.35	0.24	-0.08	0.76	1.33	-0.44	1.3	0.76	0.12
RP0477	1.66	0.16	-0.07	-0.3	-0.49	-0.41	1.14	0.37	0.17	0.23	-0.21	0.03	1.4	0.43	0.04	0.32	-0.25	-0.29	0.93	0.59	0.37	0.3	0.31	0.4	1.01	-0.14	-0.41	1	-0.65	-0.65	0.37	0.69	0.14	1	-0.87	0.87	0.9	0.59	0.46	1	0.14	0.31	0.76	0.92	0.68	0.95	-0.11	-0.41	0.62
RP0478	1.2	1.1	-0.44	0.39	0.5	0.11	0.34	0.79	-0.16	0.48	0.89	0.57	0.6	0.91	-0.05	0.2	0.8	0.28	1.79	0.77	0.68	0.9	0.29	0.71	0.99	0.03	1	1	-0.93	-0.22	0.5	0.26	0.86	1	-0.18	0.15	0.92	-0.11	0.91	1	0.28	-0.26	0.97	0.34	1.38	0.91	1.05	0.75	0.53
RP0479	2.58	1.91	2.25	1.59	2.47	2.04	1.65	1.09	1.13	1.39	0.89	1.01	1.28	0.82	1.31	1.02	0.74	0.69	1.97	0.87	1.15	0.13	0.4	0.45	-0.8	1.22	-1	-1	-0.96	0.44	0.68	0.55	0.62	0.65	0.48	0.29	0.4	0.91	0.47	0.11	-0.16	0.38	0.53	1.87	1.53	-0.14	1.6	0.92	0.52
RP0480	2.39	1.03	0.3	0.85	1.84	1.14	1.38	0.85	1.02	0.99	0.8	0.94	1.53	1.25	1.36	1.31	1.28	0.99	1.67	0.89	0.83	0.13	0.92	0.84	1	0.51	1	1	-0.42	0.19	1.05	0.81	1.13	1	1.06	0.41	1.01	0.84	1.38	1	0.57	0.55	1.15	1.32	1.14	1.01	0.79	0.58	1.03
RP0481	1.54	0.07	-0.33	0.53	-0.48	-0.58	0.35	-0.89	-1.43	-0.94	-0.73	-0.86	1.19	-0.6	-1.34	0.08	-0.65	-1.06	0.19	-1.64	-1.52	-0.85	-1.29	-1.22	-0.96	-0.05	-1.18	-1	0.2	-1.18	-0.87	0.78	-1.85	-1.47	0.49	-0.92	-0.56	0.22	-0.59	-1.19	0.32	-1.14	-1.07	0.26	0.76	-0.6	-0.74	-1.65	-1.25
RP0482	-0.36	2.31	1.15	0.63	1.66	0.77	1.67	1.91	1.92	1.59	1.51	1.74	1.28	2.38	2.18	1.66	1.64	1.59	1.84	1.8	1.58	1.03	1.09	1.13	1	1.02	1	1	-0.83	1	1.01	1.06	1.21	1	0.91	1.6	1.02	1.63	1.17	1	0.83	1.37	1.19	1.94	1.39	0.96	1.08	1.2	1.16
RP0483	1.44	3.06	1.32	1.84	1.66	1.14	1.55	1.11	1.08	1.35	0.63	0.85	1.9	1.52	1.59	1.79	0.91	0.94	1.9	0.7	1.48	0.37	0.75	0.93	-1.18	0.39	-1	-1	-0.99	0.84	0.62	0.25	0.21	0.57	0.25	0.58	-0.06	1.13	0.43	-0.16	-0.74	0.89	0.57	1.58	1.34	0.04	1.35	1.11	0.68
RP0484	1.93	2.16	2.01	1.22	1.6	1.24	1.43	0.95	1.2	1.32	0.98	1.26	1.76	1.52	2.11	1.53	1.41	1.72	1.69	1.01	1.26	0.56	0.74	0.73	-1.14	0.31	-1	-1	-1.01	0.77	0.91	0.64	0.36	0.66	0.96	0.03	0.08	0.43	0.39	-0.01	-0.36	0.83	0.84	1.84	1.68	1.53	1.4	1.1	0.77
RP0485	2.66	2.37	2.27	2.25	1.88	2.1	2.24	1.54	1.73	1.98	1.61	1.98	2.56	1.63	1.94	1.94	1.64	1.8	2.29	1.91	1.59	0.96	1.43	1.16	1.02	1.73	1	1	1	1.05	1.17	1.33	1.23	1	1	2.03	1.02	1.53	1.11	1	1	1.71	0.96	2.33	1.08	0.97	1.91	1.03	1.27
RP0486	0.56	0.7	-0.52	-0.91	0.62	-0.31	0.67	1.02	0.64	0.15	1.1	0.67	0.51	1.03	0.32	0.14	0.97	0.42	1.63	1.29	1.03	0.96	1.02	0.93	1	-0.47	1	1	-0.78	-0.65	0.82	0.34	0.78	1	0.14	1.11	0.91	0.56	1.24	1	0.19	0.87	0.99	0.69	1.29	0.99	1	0.83	1.03
RP0487	2.33	0.63	0.76	1.61	1.17	1.18	0.99	0.88	0.57	1.16	1.38	1.57	1.54	0.59	0.61	1.36	0.95	1.1	1.78	1.49	1.25	1.03	1.01	0.99	0.97	1.13	1	1	1	-0.11	1.17	0.97	0.96	1	1	-0.22	1.02	-0.27	0.89	1	1	-0.52	1.01	1.57	1.05	1	1	0.81	1.12
RP0488	2.22	1.23	1.35	1.55	1.07	1.35	1.96	0.85	1.04	1.69	0.94	1.35	1.98	0.61	0.84	1.63	0.85	0.93	1.76	1.11	1.14	1	1.38	1.02	1.03	1	1	1	1	-0.32	1.08	1.36	0.55	1	1	1.2	0.99	1.6	1	1	1	1.39	1.04	1.92	1.07	1.04	2.12	0.62	1.37
RP0489	2.26	1.98	2.29	1.03	0.55	0.7	1.85	0.56	1.21	1.2	0.88	1.43	2.26	1.11	1.52	1.03	1.22	1.32	2.05	1.39	1.74	0.77	0.57	0.77	0.88	1.63	1	1	1.02	1	0.76	1.21	0.22	1	0.28	1.96	0.71	1.2	0.84	1	0.43	1.71	0.93	1.62	2.19	0.72	0.83	1.06	0.6
RP0490	0.61	0.82	0.73	0.27	0.9	0.23	0.07	1.65	1.07	0.24	0.98	0.78	0.16	1.14	0.21	-0.39	1	-0.2	0.57	0.63	0.3	0.98	0.86	0.88	0.99	-0.69	1	1	-0.05	-0.98	0.83	0.36	0.95	1	0.03	0.31	1	-0.35	1.38	1	0.69	-0.28	0.92	0.39	1.28	1.01	0.65	0.51	1.09
RP0491	1.99	1	0.91	1.06	0.28	1.03	0.83	0.62	0.19	-0.38	-0.05	-0.09	1	0.83	0.41	0.06	-0.12	-0.01	1.64	-1.48	-1.33	0.5	0.38	0.57	-0.94	0.03	-0.87	-1	0.01	-0.91	0.02	0.25	-1.72	-0.39	0	-0.85	-0.01	-0.4	-1.32	-0.34	0.48	-1.09	0.13	0.74	1.95	-0.07	1.1	-1.49	-0.09
RP0492	1.23	0.7	0.26	0.59	0.72	0.51	0.99	1.03	0.94	1.19	1.21	1.43	1.13	0.85	0.67	1.29	1.12	0.95	1.65	1.48	1.37	0.94	1.57	1.19	1.04	0.45	1	1	1	-0.93	1.12	0.86	0.49	1	1	-0.29	0.98	-0.34	0.33	1	1	-0.27	0.93	1.34	1.08	0.96	1.91	0.55	1.16
RP0493	0.63	0.12	0.57	0.38	-0.19	0.86	-0.04	-0.23	0.71	0.41	-0.6	0.56	0.12	-0.22	0.63	0.28	-0.56	0.31	0.48	-0.82	-0.87	1.03	0.97	0.78	-0.01	-1.08	-1	1	-0.46	-1	-0.25	-1.72	-1	1	-1.02	-1	-0.37	-1.11	-1	1	-0.42	-1	-0.11	0.46	2.03	1.04	1	0.32	0.08
RP0494	0.97	1.83	0.79	0.57	0.99	1.51	1	1	1.03	0.82	0.61	0.67	1.46	1.81	1.49	1.49	1.13	1.33	1.07	0.23	0.81	-0.2	0.15	-0.18	-1.08	-0.78	-1	-0.99	-1	0.04	0.16	0.09	-0.19	0.15	-0.19	0.15	-0.41	-0.02	-0.25	-0.61	-0.68	0.56	0.4	0.66	1.26	-0.27	1.27	0.35	0.26
RP0495	1.47	0.25	0.22	1.24	0.71	0.12	0.6	0.77	0.5	0.39	0.71	0.51	1.15	0.59	0.39	0.78	0.45	0.11	0.24	0.76	0.64	0.98	1.05	1.01	-1.01	-1.24	-1	-0.96	-0.46	-0.98	0.86	0.04	0.29	0.01	1.13	0.2	0.62	-0.89	-0.27	0.51	1.18	-0.45	0.06	0.64	1.65	1.68	0.69	0.27	0.84
RP0496	1.58	0.32	1.54	0.84	0.38	0.98	-0.14	0.83	0.64	-0.08	1.24	1.26	0.56	-0.08	0.11	-0.35	0.41	0.41	1.01	0.45	-0.41	0.85	0.41	0.59	1	-0.16	1	1	0.61	-0.98	0.15	0.62	0.61	1	-0.97	0.2	0.89	0.03	0.6	1	-0.33	-0.38	0.78	0.77	1.47	0.85	1.48	0.29	0.72
RP0497	1.85	0.04	1.09	0.99	-0.35	1.11	2.41	0.31	1.68	2.09	0.53	1.63	2.65	0.2	1.98	1.96	0.51	1.83	0.63	-0.04	-0.3	0.53	-0.08	0.37	0.9	-1.14	1	1	-0.94	-1	-0.78	-1.44	1.03	1	-1.38	-1.15	0.31	-1.22	1.02	1	-1.1	-1.66	0.2	-0.46	1.06	0.47	0.01	0.37	-0.09
RP0498	1.3	1.87	1.37	1.4	2.94	1.93	0.56	1.21	0.82	0.85	1.12	1.09	0.36	1.58	0.8	0.66	1.54	1.23	2.3	1.02	1.48	0.38	0.56	0.37	-0.86	1.24	-1	-1	-0.98	0.53	0.88	0.62	0.6	0.94	0.56	0.54	0.64	1.51	0.91	0.67	-0.37	0.97	0.85	2.15	1.6	0.26	1.5	1.11	0.83
RP0499	1.49	0.09	0.15	0.82	-0.31	-0.27	0.1	-0.66	-0.85	0.22	-0.5	-0.13	-0.66	-1	-2.03	-0.25	-0.94	-1.04	1.14	0.29	-0.1	0.84	0.28	0.56	1	0.6	-1.57	1	0.88	-0.91	0.08	1.12	-0.16	1	-0.98	0.37	0.92	1.4	-0.7	1	-0.36	-0.1	0.79	0.6	1.6	0.84	1.62	-0.54	0.69
RP0500	1.62	0.87	1.79	0.69	1.39	1.01	1.35	1.12	2.02	0.56	0.82	0.95	1.24	0.47	2.11	0.11	0.69	0.55	1.28	0.23	0.07	0.45	0.42	0.59	0.99	0.33	-1.01	1	0.16	-1.1	0.97	1.06	0.33	1	0.94	-0.5	1	0.77	0.57	1	0.63	-0.53	0.92	0.37	1.13	0.99	0.73	-1.39	0.66
RP0501	1.22	0.31	0.24	-0.02	-0.85	-0.49	0.17	-0.42	0.42	-0.27	-0.85	-0.36	0.26	-0.21	0.59	-0.38	-0.85	-0.59	0.51	-0.52	-0.64	0.88	0.43	0.61	1	-0.29	-1	1	-0.08	-1.02	-0.15	-0.43	-0.75	1	-1.14	-0.29	0.53	-0.51	-0.7	1	-0.29	-0.47	0.8	0.93	1.32	0.89	0.56	-0.3	0.21
RP0502	2.11	1.74	2.03	2.16	1.66	2.09	1.75	1.07	1.49	1.75	1.13	1.58	1.81	1.33	1.64	2.01	1.1	1.51	1.65	1.28	0.81	1.02	1.27	1.12	0.95	0.66	1	1	0.88	-0.32	1.13	0.85	1.03	1	1.2	0.12	0.99	-0.37	0.39	1	1.11	-0.31	0.86	1.35	1.92	1.02	1.37	0.69	1.12
RP0503	2.07	0.87	0.67	0.77	-0.18	0.46	1.17	0.51	0.72	1.18	0.65	1.47	1.6	0.79	0.8	0.88	0.57	1.04	1.37	0.51	0.08	0.92	0.76	0.7	0.91	-0.59	1	1	-0.57	-0.77	-0.06	-0.88	-0.04	1	-1.15	0.68	0.4	-0.68	0.66	1	-0.38	0.32	0.71	0.8	1.24	0.94	0.32	0.43	0.39
RP0504	2.05	2.26	2.22	1.38	2.64	2.3	0.86	1.28	1.12	0.63	1.45	1.28	0.93	0.88	0.61	0.24	1.05	0.74	1.65	1.47	1.03	0.21	1.04	0.76	0.97	0.66	1	1	0.74	-0.31	1.14	1.03	1.21	1	1.19	0.81	1.01	-0.1	0.75	1	1.09	0.04	0.5	1.19	1.64	1	1.2	0.46	1.06
RP0505	2.29	1.57	2.52	1.43	0.66	1.59	1.83	-0.75	1.06	1.19	-0.29	0.7	2.75	0.27	1.84	1.39	0.18	1.1	1.87	0.58	1.29	0.63	0.1	0.68	0.99	1.65	1	1	0.94	1.05	0.7	1.25	1.05	1	0.24	0.63	1	1.28	1.09	1	0.34	0.88	0.46	1.42	1.38	0.53	1.78	1.35	0.43
RP0506	2.89	1.8	1.88	2.32	1.34	1.7	2.1	2.23	2.44	2.38	2.13	2.46	2.26	1.92	2.15	2.51	1.66	1.96	1.68	2.24	1.54	1.01	0.12	0.44	0.68	-0.14	-0.84	1	1	-1	0.95	0.6	-0.65	1	1	-1	0.77	-0.45	-1	1	1	-1	1.08	2.62	1.77	0.8	2.82	1.12	1.34
RP0507	2.89	1.76	1.86	2.3	1.3	1.66	2.13	2.1	2.4	2.4	2.08	2.44	2.31	1.9	2.17	2.52	1.63	1.95	1.65	2.28	1.57	0.82	-0.32	0.14	0.68	-0.14	-0.84	1	1	-1	0.95	0.6	-0.65	1	1	-1	0.77	-0.45	-1	1	1	-1	1.07	2.5	1.67	0.6	2.81	0.98	1.22
RP0508	1.22	0.05	0.33	0.74	-0.27	0.24	0.88	-0.57	0.25	0.31	-0.37	0.2	0.95	-0.14	0.12	1.14	-0.11	0.16	0.11	-0.71	-0.47	-0.82	-1.92	-1.65	-1.08	-0.19	-1.06	-1	1	-1.03	-2.08	-0.3	-1.24	-1.03	1	-0.85	-1.54	-0.36	-1.03	-1.01	1	-1.26	-2.02	0.67	0.64	-1.48	-0.03	-0.67	-2.13
RP0509	0.73	1.92	0.76	-0.68	1.03	0.38	-0.35	1.57	1.43	0.6	1.3	1.32	-0.11	1.68	1.46	0.58	1.24	1.08	1.05	1.07	0.92	0.96	0.65	0.85	0.99	-0.65	1.02	1	-0.48	-0.89	0.64	0.3	1.14	1	-0.04	0.41	0.96	-0.06	1.02	1	0.38	-0.09	0.98	0.52	1.42	0.99	1.34	0.75	0.91
RP0510	0.08	0.5	0.01	0.32	0.7	0.81	0.45	0.31	0.68	0.37	0.89	1.1	-0.03	0.19	0.21	0.33	0.61	0.85	1.55	0.82	0.71	0.96	1.05	0.97	0.94	0.8	1	1	1	-0.65	1.05	1.28	1.11	1	1	0.77	0.95	1	1	1	1	0.65	0.98	1.44	0.92	0.99	1	0.83	1.12
RP0511	0.69	0.48	-0.22	0.29	0.19	0.42	1.03	-0.59	0.05	-0.53	-0.26	-0.19	1.45	0.09	0.7	0.16	-0.01	0.21	-0.28	-1.23	-0.88	-0.39	-0.19	-0.01	-0.84	-1.77	-1	-1	-1.01	-0.81	-0.87	-1.21	-1.54	-0.96	-1.01	-1.09	-0.28	-1.34	-0.68	-0.43	-0.35	-1.07	-0.42	-0.46	0.96	-1.03	-0.09	-0.32	-0.6
RP0512	0.27	-0.59	-0.84	-0.36	-0.87	-0.54	-0.08	-1.41	-0.76	-1.02	-0.99	-0.82	1.08	-0.97	-0.06	-0.25	-0.74	-0.37	-0.16	-1.28	-1.18	-0.92	-1.22	-1.04	-0.85	-1.23	-1.16	-1	-0.83	-1.15	-1.47	-1.07	-1.67	-1.06	-1.27	-1.35	-0.73	-1.15	-1.39	-0.87	-0.89	-1.35	-1.09	-0.5	-1.34	-0.94	0.94	-1.42	-1.35
RP0513	0.88	0.51	-0.2	0.45	-0.69	0.19	0.56	-0.14	-0.03	0.22	-0.21	0.4	1.2	0.6	0.64	0.67	0.25	0.88	1.01	-1.14	-0.46	0.96	0.47	0.7	-1.1	-0.62	-0.99	-1	-0.97	-0.34	-0.7	-1.19	-1.72	-1.37	-0.52	-0.29	-0.75	-1.2	-1.23	-0.9	0.19	-0.34	-0.04	0.66	1.44	-0.48	1.06	-0.12	-0.51
RP0514	2.38	1.68	2	1.28	0.32	0.98	3.1	1.92	2.56	2.42	1.24	1.91	3.04	1.87	2.44	2.19	1.11	1.55	1.56	1.83	1.49	0.68	0.55	0.74	0.87	1.04	1	1	-0.61	0.43	0.6	1.03	1.06	1	-0.17	1.31	1	1.41	0.99	1	0.5	0.99	0.5	1.19	1.61	0.6	0.43	0.97	0.81
RP0515	1.74	1.35	0.87	0.92	0.46	0.64	0.77	0.81	1	0.14	0.62	0.4	1.3	1.14	1.33	-0.12	0.44	0.31	0.61	0.14	-0.11	-0.36	-0.39	0	-0.9	-0.83	-1	-1	-0.99	-0.76	-0.56	-0.67	0.13	0.02	-0.75	-0.79	0.09	-0.95	0.12	0.22	-0.25	-1.15	-0.17	0	1.15	-0.57	0.51	-0.53	-0.45
RP0516	0.73	0.64	1.61	0.48	0.53	0.85	-0.14	-0.05	0.75	0.11	-0.2	0.38	0.02	0.51	1.32	-0.09	0.09	0.55	0.99	-0.26	-0.17	1.03	0.37	1.01	1	0.14	1	1	0.9	-0.95	0.85	0.78	1	1	0.31	-0.12	1.01	-0.07	1.39	1	0.36	-0.79	1.05	0.8	1.39	1	1.42	0.49	0.58
RP0517	1.84	0.72	1.03	1.32	0.25	0.82	0.2	0.03	-0.97	-0.04	-0.02	-0.05	-0.26	-0.53	-1.41	-0.8	-0.81	-0.8	1.29	-0.38	-1.49	-0.01	-0.57	-0.55	0.99	-0.33	-1.49	1	0.55	-1.01	0.17	0.28	0.05	1	-1	-0.36	0.85	-0.35	-0.49	1	-0.31	-0.92	0.4	0.76	1.55	0.89	1.24	-0.64	0.16
RP0518	1.14	1.43	1.39	0.19	0.78	0.71	0.91	0.99	1.64	1.05	1.5	1.44	0.89	1.42	1.61	0.87	1.4	0.99	1.64	1.22	0.88	0.94	0.64	0.84	1	0.54	1	1	0.57	-0.42	0.69	1.17	1.06	1	0.18	0.86	1.01	1.28	1.09	1	0.51	0.67	1.01	1.28	1.65	0.96	1.43	0.69	0.94
RP0519	1.1	0.93	0.84	0.17	0.19	0.17	0.28	-0.1	-0.11	0.49	-0.04	0.2	0.09	-0.37	-0.59	0.11	-0.33	-0.24	1.3	0.06	0.23	-0.21	-0.04	-0.1	0.87	0.58	1	1	-0.21	-0.61	0.79	0.99	0.47	1	0.38	0.19	0.83	1.2	0.67	1	-0.56	0.16	0.24	0.74	0.97	0.51	-0.45	0.04	0.39
RP0520	2.12	2.11	0.76	2.25	2.25	2.74	0.77	1.53	1.52	0.82	1.24	1.39	0.38	1.22	0.9	0.96	1.46	1.59	1.83	0.54	1	0.01	0.53	0.37	0.99	1.11	1	1	-0.98	0.83	0.75	0.61	0.54	1	0.01	0.62	0.87	1.52	1.23	1	-0.29	0.82	0.66	1.77	1.25	0.81	0.04	1.01	0.78
RP0521	1.42	1.49	1.2	1.49	1.26	1.32	1.55	0.46	0.7	1.56	0.87	1.22	2.23	0.93	1.18	2.24	1.15	1.36	1.81	0.99	1.37	0.96	0.6	0.72	-1.17	0.39	1	0	0.66	-0.14	0.62	-0.08	0.67	0	1.2	0.39	0.34	-0.58	-0.03	0.63	1.13	-0.07	-0.09	1.27	1.5	1.73	1.47	0.69	0.61
RP0522	2.13	2.02	1.83	1.88	1.73	1.81	1.73	0.79	1.02	0.81	1.22	1.31	1.82	1.1	1.29	1.23	1.34	1.31	1.97	1.25	1.18	1	1.24	1.01	0.99	1.73	1	1	1	1.05	1.05	1.34	1.05	1	1	1.49	0.98	1.99	1.13	1	1	1.46	1.04	2.24	1.03	1.03	1.01	1.11	1.27
RP0523	1.34	2.37	3.06	0.73	1.35	1.42	0.51	0.93	0.58	0.52	0.55	0.58	0.05	0.98	0.62	-0.29	0.05	-0.29	-0.42	0.06	-0.9	-0.11	0.72	0.69	-1.05	-1.29	-1	-1	-0.82	-0.99	0.57	0.24	-0.18	0.37	0.77	-0.86	0.17	-0.77	-0.23	0.07	0.46	-0.83	0	-0.61	1.25	0.08	0.82	-1.07	0.38
RP0524	1.85	1.29	1.81	1.63	0.81	1.07	1.37	1.14	1.27	1.3	1.4	1.48	0.83	1.34	1.33	1.39	1.44	1.58	2.25	1.42	1.61	1.03	0.77	1.05	0.98	0.73	1	1	-1.01	0.56	0.83	0.54	0.89	1	0.38	0.84	0.87	1.12	1.24	1	-0.19	0.8	1.19	1.58	1.38	1	1.23	1.13	0.91
RP0525	2.25	1.38	1.98	1.18	1.05	0.88	1.91	1.45	1.58	1.52	1.29	1.57	1.76	1.14	1.05	0.57	1.01	0.8	1.91	2.12	1.59	1	1.28	0.96	0.95	1.04	1	1	-0.23	1.03	1.01	0.82	1.03	1	0.69	2.08	0.93	0.9	0.75	1	1.05	1.58	0.86	1.95	1.25	1.04	0.75	1.03	1.25
RP0526	2.66	1.85	2.15	2.7	1.9	2.29	2.9	1.22	1.74	2.63	1.76	2.3	2.5	1.08	1.67	2.34	1.7	2.16	2.43	2.08	1.86	0.86	0.61	0.84	1	1.5	1	1	0.36	0.93	0.97	1.24	1.05	1	0.87	1.72	1.02	1.32	0.67	1	0.65	1.2	0.89	1.73	1.43	0.85	1.93	1.21	0.82
RP0527	0.8	0.21	0.09	0.76	0.13	0.39	1.46	0.76	0.93	0.7	-0.15	0.34	1.53	0.66	1.47	1.22	0.32	0.73	0.11	-0.79	-0.53	-0.78	-0.73	-0.46	-1.08	0.16	-1.65	-1.04	-1.25	-0.74	-0.43	0.26	-0.29	-0.2	-0.24	-1.45	-0.55	0.32	-1.07	-0.62	-0.93	-1.07	-0.38	0.59	-1.19	-0.43	-1.17	-0.67	-0.66
RP0528	2.58	1.95	2.11	1.79	0.8	1.42	2.1	0.94	1.68	1.77	0.65	1.25	1.73	1.5	2.06	1.63	0.58	1.08	1.96	0.56	0.41	0.35	0.56	0.54	0.99	1.49	1	1	0.9	0.95	1.01	1.06	1.02	1	1.06	0.36	1.04	0.24	0.53	1	1.04	-0.08	0.78	1.9	1.44	1	1.24	1.09	0.83
RP0529	2.32	1.21	2.27	1.87	1.35	1.42	-0.5	0.39	-0.08	0.03	0.17	-0.14	0.14	1.15	0.96	0.46	0.74	0.17	0.96	-0.05	0.47	-0.43	0.49	0.28	-0.99	0.75	-1	-1	-0.38	0.84	0.76	0.89	0	0.63	0.56	0.34	0.49	1.18	0.02	0.21	-0.04	0.83	-0.62	1.35	1.08	-0.3	0.71	0.94	0.65
RP0530	1.08	2.29	1.85	0	1.82	1.26	0.43	0.94	0.61	0.25	0.66	0.69	0.71	1.55	0.99	0.47	1.16	0.88	1.22	0.54	1.05	-0.1	0.71	0.54	-1	0.16	-1	-0.99	-1.01	0.98	0.56	0.15	0.34	0.61	-0.14	0.9	0.06	0.46	0.8	0.19	-0.64	1.14	-0.01	1.16	1.19	-0.41	1.06	1.28	0.69
RP0531	1.11	0.56	0.36	0.7	0.4	0.68	0.02	0.31	0.64	0.12	0.38	0.55	0.73	0.87	1.06	0.58	1.15	1.35	0.89	-0.66	0.09	-0.43	0.35	0.06	-0.93	0.16	-1	-0.99	-0.98	0.99	0.29	-0.23	-0.66	-0.11	-0.37	0.32	0.08	-0.64	-0.54	-0.22	0.11	0.51	-0.78	0.89	0.85	-1.24	-0.43	0.83	0.41
RP0532	0.87	-0.48	-0.26	0.46	-1.17	-1.18	-1.46	-0.68	-0.71	-1.34	-1.27	-1.18	-1.21	-0.83	-0.59	-1.22	-1.54	-1.57	-0.42	-1.28	-1.29	0.47	0.76	0.76	-1	-0.74	-1	-1	0.08	-0.61	-0.04	0.16	-1.49	-1.14	0.75	0.5	-0.24	-0.49	-1.24	-0.84	0.92	0.06	-0.38	0.35	1.39	0.1	0.2	-0.04	-0.09
RP0533	0.71	1.73	1.47	-0.31	1.61	0.48	1.06	1.43	1.1	0.95	1.08	1.04	1.29	1.86	1.42	0.83	1.24	0.84	1.45	1	1.22	0.16	0.89	0.85	-0.86	0.4	-1	-1	-0.98	0.98	0.87	0.45	0.44	0.65	0.77	0.43	0.46	0.45	0.36	0.32	0.25	0.94	0.34	1.33	1.25	-0.17	0.91	1.36	0.82
RP0534	0.62	1.09	0.86	-0.3	0.92	1.05	1.27	1.2	1.38	1.58	1.34	1.42	-0.27	0.06	-0.38	-0.07	0.15	0.05	1.02	1.75	0.66	0.89	0.64	0.81	-0.98	0.16	-1	-0.99	-0.92	0.99	0.83	0.71	0.11	0.16	1.16	1.27	0.07	0.81	-0.78	-0.47	1.16	1.41	-0.17	1.16	1.14	-0.39	1.15	1.21	1.05
RP0535	1.1	0.79	0.41	0.34	0.37	0.6	1.03	0.6	0.59	0.53	0.25	0.23	0.71	0.42	0.73	0.78	0.43	0.57	0.86	-0.1	0.07	-0.63	-0.35	-0.6	-1.2	-0.7	-1	-1	-0.97	-0.3	-0.39	-0.22	-1.16	-0.93	-0.11	0.03	-1.03	-0.29	-1.24	-1.19	-0.69	0.54	-0.45	0.51	1.02	-0.73	1.3	0.27	-0.42
RP0536	1.8	0.54	0.97	1.32	0.56	1.35	1.06	0.74	0.88	1.05	0.84	1.12	1.44	0.93	1.33	1.05	0.87	1.21	1.26	0.58	0.56	0.98	1.19	1.75	0.99	0.54	1	1	0.23	-0.34	1.1	0.85	0.69	1	1.11	-0.32	1.04	0.2	1.08	1	0.88	-0.07	1.07	1.27	1.47	0.62	1.27	0.66	0.93
RP0537	-0.09	1.76	0.78	0.84	1.49	1.84	-1.03	0.2	-0.43	0.06	0.6	0.48	-1.87	0.74	0.04	0.49	1	0.96	1.3	0.58	1.13	-0.34	0.19	0.02	-0.79	0.8	-1	-0.99	-1.03	0.82	0.42	0.86	0.19	0.64	0.06	0.52	0.23	1.61	0.21	0.2	-0.67	0.69	-0.11	1.27	1.01	-0.48	0.92	0.89	0.48
RP0538	1.88	1.78	1.9	0.16	1.94	1.71	0.26	0.95	0.53	0.23	0.86	0.62	0.24	1.07	0.74	-0.45	0.79	0.23	0.59	0.2	-0.29	0.61	0.89	1.02	1.01	-0.23	1	1	-0.2	-0.88	1.01	0.51	0.14	1	0.94	-0.91	1	-0.42	0.69	1	0.69	-0.85	1.07	0.39	1.7	1.03	0.98	0.04	0.82
RP0539	1.62	1.09	1.37	0.26	1.77	2.16	0.63	1.08	1.11	0.48	0.85	0.92	0.84	0.59	0.88	0.39	0.82	1.11	1.44	0.3	0.24	1.03	0.83	1.02	-0.96	0.66	-1	-1	-0.9	1.03	0.18	-0.3	-0.62	-0.21	0.16	0.1	-0.2	-0.36	-0.41	-0.57	0	0.39	0.05	1.5	1.36	0.06	1.03	1.14	0.29
RP0540	2.37	2.33	2.28	0.62	1.35	0.87	2.13	1.61	1.67	1.75	1.3	1.45	3.14	2.37	2.59	1.88	1.67	1.63	1.6	0.71	1.51	1.03	0.74	1.08	0.97	1.09	1	1	-1.03	0.92	0.84	0.42	0.56	1	0.43	0.15	0.91	1.3	0.91	1	0.05	0.96	1.21	1.77	1.41	0.98	1.31	1.28	0.81
RP0541	2.33	2.34	2.84	2.49	2.44	2.57	4.06	2.35	3.17	2.72	1.85	2.18	4.04	2.76	3.45	2.72	2.21	2.44	2.24	1.59	1.69	1.02	1.03	1.09	0.97	1.01	1.02	1	-0.51	1.05	0.99	0.84	1.22	1	0.83	1.11	1.02	1.33	1.2	1	0.72	1.11	1.32	1.13	1.52	1.02	1.37	1.2	1.13
RP0542	0.89	1.74	1.24	1.41	2.17	1.55	1.08	1.4	1.43	0.78	1.15	1.02	1.61	1.62	1.32	1.24	1.7	1.38	1.98	1.02	1.24	1.03	0.71	0.97	0.97	1	1	1	-0.78	1.04	0.77	0.6	0.94	1	0.18	0.81	0.85	1.09	1.17	1	-0.14	0.98	1.02	1.64	1.4	0.99	1.1	1.23	0.87
RP0543	0.97	2.41	1.63	0.4	1.44	0.97	0.51	0.98	0.76	0.53	0.59	0.53	0.75	1.21	0.89	0.25	0.39	-0.01	0.19	0.38	0.38	-0.34	0.14	-0.14	-0.8	-0.22	-1	-0.99	-0.96	-0.65	0.65	0.84	0.6	0.54	0.73	0.02	0.28	0.7	0.18	-0.02	-0.12	0.04	0.18	-0.17	1.28	-0.13	1.09	0.06	0.4
RP0544	1.16	0.72	1.06	-0.34	-0.78	-0.4	1.16	0.02	0.92	0.08	-0.68	-0.2	1.78	0.61	2.13	1.15	-0.09	0.64	0.24	-1.34	-0.09	0.28	0.17	0.34	-1.06	-1.85	-1	-0.98	-0.99	-0.67	-0.44	-1.49	-1.28	-0.55	-1.1	-0.66	-0.5	-2.06	-0.64	-0.59	-1.1	-0.34	-0.08	0.62	1.02	0.14	1.21	0.14	-0.18
RP0545	2.46	1.57	1.5	1.77	1.59	1.69	0.74	0.43	0.43	0.42	0.74	0.9	1.34	0.76	0.75	0.93	1.13	1	1.83	0.84	1.07	0.97	1.15	0.99	1.02	1.73	1	1	1	1.04	1.07	1.34	0.73	1	1	1.02	0.95	1.81	1	1	1	1.29	1	2.11	1.07	1	1	1.19	1.21
RP0546	1.25	1.5	1.08	1.13	1.02	1.05	-0.02	-0.35	-0.31	0.64	-0.36	0.1	0.09	0.97	0.65	0.92	0.71	0.85	1.55	-0.83	0.48	0.47	-0.13	0.24	-1.99	-0.24	-0.69	-0.9	-0.69	-1	-2.46	-2.48	-1.14	-2.25	-1.22	-1	-2.39	-1.07	-0.02	-1.23	-0.66	-1	-2.06	0.5	2.14	0.05	0.14	-0.39	-2.05
RP0547	1.72	1.85	1.46	1.56	2.87	1.89	1.29	1.58	1.55	0.91	1.43	1.18	2.06	2.11	1.55	1.78	2.32	2.07	0.94	1.26	1.83	-0.11	0.45	0.36	-1.08	0.44	-1	-1	-1.08	0.86	0.52	0.6	0.8	0.69	0.17	1.03	-0.16	1.4	0.84	0.12	-0.85	0.94	0.27	0.86	1.49	-0.04	1.41	0.84	0.52
RP0548	2.26	2.61	3.03	1.58	1.98	2.74	2.04	1.7	2.07	1.48	1.18	1.35	1.44	1.61	1.93	1.16	1.09	1.34	1.7	0.79	0.63	0.81	0.44	0.62	0.97	1.43	1	1	0.54	0.8	0.79	1.07	0.82	1	0.41	0.57	1.03	0.49	0.9	1	0.73	0.07	0.78	1.58	1.46	0.77	0.77	1.16	0.91
RP0549	1.41	-0.36	-1.43	0.95	0.16	-0.29	1.97	0.72	0.99	1.97	0.92	1.28	1.76	0.39	0.72	1.79	0.53	0.67	1.97	1.35	0.72	1.03	0.59	0.67	0.97	1.02	1	1	-0.89	1.04	0.83	0.23	-0.07	1	0.42	0.46	0.75	-0.33	-0.66	1	0.87	0.07	1.03	1.91	1.39	1	1.12	1.23	0.86
RP0550	1.73	1.34	0.42	1.1	1.86	1.33	0.84	0.35	0.78	0.57	0.56	0.56	0.93	0.59	0.71	0.89	0.75	0.66	2.11	0.75	0.97	0.92	0.76	0.91	0.99	0.37	1	1	-0.46	0.14	0.97	1.05	0.94	1	0.93	0.66	1.03	1.18	1.18	1	0.8	0.71	0.97	1.15	1.64	0.93	1.07	1.54	0.99
RP0551	1.46	-0.53	0.34	2.03	1.46	2.32	0.34	-1.06	-0.6	-0.6	-0.8	-0.6	0.7	-0.32	0.16	0.03	-0.08	0.04	2.1	-1	-0.81	0.81	0.3	0.67	0.98	0.09	1	1	-0.66	-0.12	0.32	-0.07	-0.73	1	-0.68	-0.39	0.5	-0.75	-0.78	1	0.23	-0.39	1.04	0.76	1.46	0.77	1.05	1.07	0.15
RP0552	2.49	0.93	1.29	2.1	1.26	1.65	0.98	1.11	1.25	1.22	1.45	1.64	1.41	1.35	1.31	1.51	1.48	1.6	1.89	1.85	1.34	0.99	1.17	1	1	1.15	1	1	0.1	1.04	1.05	1.23	1.2	1	1.13	1.73	1.06	2.16	1.26	1	1.09	1.27	1.01	1.89	1.27	1.02	0.75	1.17	1.28
RP0553	1.51	1.27	0.62	1.35	1.19	1.39	1	1.08	1.04	1.13	1.04	1.31	1.23	1.28	1.11	1.57	1.23	1.4	1.88	1.02	1.07	0.84	1.66	1.3	1.03	0.65	1	1	1	-0.77	1.07	0.74	-0.12	1	1	-0.8	0.95	-0.41	0.29	1	1	-0.47	0.73	1.42	1.11	0.79	0.96	0.48	1.09
RP0554	2.63	1.57	1.65	1.97	1.37	1.62	1.66	0.28	0.57	1.78	0.8	1.3	1.85	0.29	0.71	1.92	0.8	1.29	1.75	0.9	0.9	0.94	0.98	0.99	0.92	1.73	1	1	1	1.02	0.99	1.37	1.22	1	1	1.14	0.91	1.37	1.08	1	1	0.89	0.95	2.03	0.95	0.96	0.99	1.21	1.06
RP0555	1.23	0.89	0.89	1.13	0.68	1.04	1.48	0.68	0.91	1.61	0.62	1.19	1.26	1.06	1.15	1.64	0.92	1.29	1.18	0.7	1.11	-0.09	-0.65	-0.65	-0.94	0.46	-0.6	-0.99	1	-1	-0.48	-0.65	-1	-1.81	1	-1	-0.59	-0.35	-0.42	-1.09	1	-1	-2.19	0.86	0.9	-0.38	-0.41	-1.22	-1.01
RP0556	-0.79	0.14	0.38	0.02	0.45	-0.22	-1.11	-0.19	-1.03	-1.55	-0.46	-1.18	-1.07	0.01	-0.3	-0.66	0.11	-0.66	-0.33	-0.68	-0.47	-0.46	-0.11	-0.08	-0.77	-1.19	-1	-1	-1.03	-0.74	-0.14	-0.07	-0.99	-0.42	-0.19	-0.65	-0.3	-0.54	-0.69	-0.65	-0.82	-0.6	-0.03	-0.39	1.21	-0.43	1.05	-0.51	-0.3
RP0557	0.83	2.76	2.12	0.75	1.8	1.49	1.07	1.28	1.2	0.92	1.17	1.07	1.93	1.48	1.96	1.75	1.39	1.49	0.93	0.86	0.87	-0.38	0.5	0.24	-0.92	0.22	-1	-1	-1.05	0.8	0.63	0.68	0.42	0.4	0.61	0.76	-0.01	1.04	0.02	-0.43	-0.31	0.6	0.2	1	1.27	-0.46	1.1	0.91	0.56
RP0558	1.92	1.89	0.72	0.62	1.2	0.16	1.47	1.01	0.89	1.19	1.06	0.91	1.26	1.24	0.81	0.79	1.09	0.72	1.93	1.34	1.12	0.95	0.92	0.88	0.87	0.08	1.02	1	0.3	-0.61	0.72	0.51	0.44	1	0.3	0.99	0.67	-0.05	0.4	1	0.52	0.66	0.73	0.95	1.42	0.98	1.51	0.55	0.8
RP0559	2.17	3.76	3.79	1.14	4.04	3.59	1.78	2.99	2.29	1.44	2.18	1.83	1.96	3.51	2.94	1.05	2.14	1.74	1.79	1.62	1.17	1.03	0.81	0.92	0.99	1.19	1	1	-0.2	0.87	1.08	0.96	1.18	1	1.03	0.62	1.04	0.46	1.14	1	0.86	0.26	1.24	1.74	1.55	1.01	1.24	1.3	1.07
RP0560	0.81	1.65	0.75	0.79	0.95	0.78	1.13	1.15	1.13	1.29	1.04	1.39	0.38	0.75	0.57	0.74	0.41	0.77	1.58	1.36	0.69	1.02	1.19	1.19	0.93	0.91	1	1	1	-0.5	1.16	1.06	1.12	1	1	0.28	0.99	0.53	1.13	1	1	0.22	0.99	1.52	1.05	1.02	1.93	0.7	1.12
RP0561	2.71	2.32	2.52	1.41	2.43	1.95	0.74	0.03	0.02	-0.01	-0.11	-0.27	1.86	0.64	0.95	0.33	0.64	0.26	2.15	-0.22	0.66	1.02	0.85	0.96	1	1.97	1	1	-1	1.01	0.71	-0.41	0.21	1	-0.37	-0.08	0.9	-0.42	1.02	1	0.06	0.15	1.04	2.84	1.42	0.97	1.86	1.25	0.81
RP0562	2.69	1.37	1.92	2.17	1.45	1.77	1.9	1.17	1.2	2.07	1.56	1.83	2.22	0.91	1.07	1.94	1.2	1.22	2.1	1.93	1.34	1.02	1.37	1.05	0.99	1.97	1	1	-1	1.05	1.12	0.36	1.18	1	0.8	1.59	1	0.01	0.72	1	1.29	0.92	0.98	2.96	1.34	1.02	1.76	1.17	1.29
RP0563	2.31	1.3	2.88	2.21	2.01	2.68	2.12	1.19	1.92	1.82	1.39	1.58	2.05	1.49	2.26	1.82	1.31	1.44	1.89	1.57	1.24	0.98	1.03	0.92	1.02	1.02	1	1	-0.75	1.01	0.98	0.78	1.15	1	0.66	1.39	1.03	0.57	1.28	1	1.11	0.88	1.24	1.95	1.28	1.01	0.98	1.75	1.17
RP0564	1.8	2.23	1.84	1.1	1.57	1.17	1.82	1.88	1.82	1.5	1.29	1.27	1.68	2.03	1.95	1.5	1.31	1.23	1.91	1.49	1.27	1.03	0.87	0.98	1.01	1.41	1	1	0.49	1	0.94	1.2	1.14	1	0.92	1.28	1.04	1.1	0.73	1	0.91	0.87	1.12	1.89	1.94	1.01	1.37	1.26	1.02
RP0565	0.05	1.63	0.56	-0.2	0.51	0.84	-1.16	0.52	-0.32	-0.87	1.03	0.34	-0.72	0.79	-0.16	-0.58	1.15	0.53	-0.26	-0.8	-0.65	-0.2	-0.32	0.02	-0.89	-1.22	-1	-1	-0.41	-1.04	-0.37	-0.02	-0.85	-0.35	-0.63	-0.42	0.22	-0.44	-1.03	-0.07	-0.13	-0.84	-0.36	-0.58	1.21	-0.97	1.02	-1.06	-0.23
RP0566	1.88	1.06	1.01	0.7	-0.63	0.07	0.67	0.2	0.13	0.24	-0.46	0.05	1.7	0.83	1.13	0.84	-0.48	0.31	0.35	-0.74	-0.78	0.85	0.28	0.59	-0.88	-1.14	-1	-1	-0.99	-0.99	-0.57	-1.3	-1.22	-0.2	-1.09	-0.98	-0.23	-1.25	-1.18	-0.15	-0.32	-0.94	0.17	0.01	1.22	-0.17	1.2	0.77	-0.27
RP0567	0.74	0.58	0.45	-0.16	0.53	0.32	1.1	0.83	1.25	0.91	1.42	1.56	0.24	0.05	-0.4	-0.56	0.65	0.12	1.32	1.29	0.01	0.97	0.72	0.71	0.96	-0.48	1	1	0.23	-0.97	0.17	0.11	1	1	-0.99	0.48	0.82	-0.24	1.2	1	-0.29	-0.02	0.82	0.92	1.91	0.99	0.68	0.6	0.9
RP0568	0.73	0.69	1.39	0.11	1	1.39	1.29	0.3	1.3	0.52	0.42	0.73	1.16	0.67	1.13	0.33	0.62	0.54	0.19	-0.13	0.05	-0.05	-0.23	-0.01	-0.84	-0.82	-1	-1	-0.91	-0.33	-0.61	-0.02	-0.94	-0.78	-0.53	0.04	-0.05	-0.12	-0.3	-0.53	-0.29	-0.19	-0.65	-0.79	1.57	-0.93	-0.56	0.28	-0.17
RP0569	1.3	0.33	1.85	0.75	-0.18	0.18	0.79	0.59	0.77	1	0.52	0.86	0.52	0.29	0.57	0.64	0.21	0.19	1.16	0.42	0.33	1.18	0.98	1.32	0.97	0.21	1	1	-0.93	-0.14	1.01	0.52	-0.01	1	0.85	-0.54	1	0.21	0.14	1	0.6	-0.19	2.19	0.97	1.53	1.02	1.37	0.91	0.9
RP0570	1.12	2.86	2.26	1.47	1.33	1.12	1.02	1.42	0.89	1.51	1.33	1.55	1.01	1.76	1.06	1.29	1.24	1.15	1.71	1.24	1	0.2	0.36	0.39	1	0.71	1	1	-0.42	0.45	0.74	0.94	0.8	1	0.01	1.25	1.06	1.05	0.54	1	0.72	0.8	0.72	1.39	1.25	0.9	0.89	0.78	0.74
RP0571	1.22	1.68	0.84	0.62	1.74	0.96	-0.65	0.34	-0.06	-1.56	-0.18	-0.94	-0.69	0.44	0.12	-1.2	-0.02	-0.81	1.02	-1.62	-1.47	-0.16	-0.08	0.14	-0.87	-1.18	-0.94	-1	-0.77	-1.1	-0.04	-0.16	-1.42	-0.2	-0.33	-1.48	0.21	-0.87	-1.39	-0.14	0.22	-1.37	-0.4	-0.33	1.48	-0.51	1	-1.41	-0.17
RP0572	0.7	-0.18	-0.53	1.04	0.88	1.01	0.61	0.72	0.54	1.21	1.37	1.32	0.49	0.65	0.17	0.97	1.45	1.1	1.88	1.34	1.34	1.02	1.04	1.07	1	1	1	1	-0.57	1.04	1	0.7	0.98	1	0.79	1.03	0.99	0.82	1.13	1	0.7	1.03	1.08	2.03	1.92	1.02	1.02	1.22	1.08
RP0573	0.79	2.47	2.56	1.19	1.91	1.35	1.33	1.17	1.38	0.84	0.48	0.71	0.51	1.72	1.74	0.87	1.02	1.03	0.32	-0.01	0.4	-0.04	0.2	0.04	-1.05	-0.66	-1	-0.99	-0.93	0.17	0.28	0.18	0.25	0.45	-0.31	0.12	-0.01	0.15	0.79	-0.19	-0.43	0.64	0.04	0.12	1.13	-0.46	1.01	0.52	0.4
RP0574	1.12	1.28	2.03	1.99	0.69	1.35	0.87	1	1.13	0.97	1	1.12	-0.07	0.72	0.82	0.01	0.56	0.19	0.85	0.9	0.33	0.29	0.94	0.84	-1	0.32	-1	-1	-0.52	0.86	1	0.81	0.35	0.75	1.12	0.31	0.66	0.35	0.04	0.48	0.86	0.64	-0.19	1.02	1.28	-0.28	0.97	1.1	1.02
RP0575	-0.4	0.4	-0.21	-0.01	0.45	0.28	1.14	0.71	0.55	1.07	0.86	1.17	0.92	0.59	0.47	0.84	0.57	0.83	1.11	1.14	0.92	1.03	1.07	1.09	0.93	0.45	1	1	1	-0.97	1.15	1.06	1.14	1	1	0.02	1.02	-0.19	0.73	1	1	-0.61	0.99	0.68	1.05	1.01	1.93	0.51	1.06
RP0576	2.41	0.3	1.9	1.12	-0.32	0.83	3.19	1.16	2.38	1.26	0.66	1.24	3.33	0.73	2.31	1.15	0.29	0.81	1.5	0.24	0.22	0.93	0.49	0.74	1.01	0.12	1	1	-0.27	-0.38	0.48	0.55	0.39	1	-0.35	0.06	0.98	0.28	0.58	1	0.43	-0.3	1.01	0.97	1.64	0.95	1.18	0.7	0.79
RP0577	2.88	2.08	2.49	1.49	1.43	1.52	1.67	1.32	1.76	1.24	1	1.19	1.99	1.66	2	1.25	1.22	1.13	2.01	0.62	0.55	1.03	0.99	0.98	0.92	1.42	1	1	0.37	1.05	0.84	0.81	-0.05	1	0.6	0.67	0.72	0.06	-0.4	1	0.78	0.42	0.84	1.79	1.41	0.98	1.43	1.18	0.83
RP0578	1.07	1.7	0.84	0.73	1.3	0.46	1.28	1.33	1.2	1.39	1.31	1.46	0.99	0.69	0.08	0.92	0.87	0.43	0.61	1.24	0.51	0.34	1.19	0.91	-0.99	0.44	-1	-0.96	0.1	0.19	0.94	0.38	-0.18	0.38	1.12	-0.48	0.47	-0.7	-0.09	0.28	1.17	0.03	-0.62	0.79	1.12	0.2	0.04	0.97	0.99
RP0579	1.66	-1.68	0.51	1.27	-1.65	0	-0.45	-2.02	-2	-0.62	-1.7	-1.6	0.16	-2.45	-1.53	-0.39	-2.07	-1.87	-0.26	-1.34	-1.26	-1.04	-0.88	-0.55	-0.79	-0.74	-1	-1	-0.94	-1.16	0.14	0.58	-0.64	-0.16	0.3	-1.06	0.31	-0.4	-0.83	-0.17	0.42	-1.4	-0.59	-0.5	0.97	-0.59	1.2	-1.47	-0.57
RP0580	0.88	0.07	0.46	0.55	-0.43	-0.08	0.31	-0.25	-0.36	-0.34	-0.53	-0.56	-0.01	-1.08	-0.35	-0.91	-0.94	-1.2	0.17	-0.82	-1.26	-0.97	-0.56	-1.49	-0.99	0.85	-1	-0.98	-1.01	0.77	-0.12	-0.57	-0.45	-0.35	-0.19	-0.66	-0.79	-1.06	-0.2	-0.8	-0.6	0.17	-0.67	0.01	1.17	-0.75	1.83	-0.78	-0.52
RP0581	1.59	0.92	0.83	0.67	0.98	0.7	1.01	0.31	0.6	0.23	0.33	0.26	0.86	0.13	0.39	-0.3	0.5	-0.08	1.04	-0.25	0.05	0.84	0.47	1	-0.82	0.04	-1	-0.96	-0.87	-0.36	0.62	0.29	-0.41	0.23	0.67	-0.79	-0.01	-0.48	-0.76	-0.45	-0.04	-0.1	1.25	1.03	1.82	1.69	1.31	0.32	0.35
RP0582	1	0.8	1.92	0.64	0.52	0.41	0.46	0.65	0.72	0.12	0.53	0.51	0.37	0.79	0.82	0.11	0.58	0.09	1.8	-0.05	0.02	0.2	0.48	0.49	0.99	0.15	1	1	-0.73	-0.28	0.86	0.48	-0.03	1	0.44	-0.28	0.97	0.09	0.64	1	0.48	-0.2	0.98	1.01	1.27	0.98	0.87	0.34	0.68
RP0583	1.83	0.4	0.75	0.04	0.01	0.11	2.01	1.08	1.61	1.75	1.24	1.65	1.43	-0.14	0.37	0.42	-0.12	0.07	0.41	1.16	-0.42	0.84	-0.01	0.5	0.99	-0.22	-1.49	1	-0.46	-0.95	1.09	0.41	-0.55	1	1.09	-1.02	1.02	-0.41	-0.13	1	1.18	-0.93	0.84	0.52	1.03	0.82	0.49	-0.93	1.02
RP0584	2.06	1.68	2.19	1.24	0.65	1.24	0.5	1.17	1.11	0.07	0.27	0.37	1.23	1.91	2.18	1.11	0.65	0.88	1.17	0.1	0.78	-0.59	-0.09	-0.05	-0.77	0.19	-1	-1	-0.98	-0.23	-0.31	0.17	-0.15	0.38	-0.95	-0.12	0.15	0.49	-0.3	-0.01	-0.58	0.01	-0.49	0.97	1.14	-0.56	1.23	-0.2	0.13
RP0585	2.52	1.88	2.68	2.09	2.13	2.78	-0.04	1.9	1.58	0.08	1.26	1.09	0.9	1.58	1.33	0.44	1.21	0.99	1.47	0.71	0.74	-0.37	0.51	0.3	-0.84	0.65	-1	-1	-1.01	0.88	0.68	0.59	0.4	0.43	0.61	0.72	0.48	0.77	0.17	0.14	0.64	0.66	-0.35	1.4	0.98	-0.73	-0.04	0.89	0.66
RP0586	0.24	1.16	0.23	-0.49	0.52	-0.38	0.87	0.7	0.58	0.88	0.9	0.85	0.49	1.18	0.6	0.5	1.03	0.58	1.07	1.12	1	1.02	0.89	0.98	0.98	-0.28	1	1	-0.77	-0.48	0.94	0.76	1.16	1	0.7	0.79	1.02	0.52	1.24	1	0.74	0.5	1.1	0.84	1.34	1.02	0.85	0.69	1.05
RP0587	0.66	0.82	0.38	0.02	1.22	0.26	1.23	0.87	0.86	0.96	1.27	1.08	1.1	0.7	0.21	0.49	1.02	0.29	0.93	0.94	0.84	0.27	1.05	0.76	-0.99	0.16	-1	-0.99	-0.94	1.04	0.77	0.46	0.34	0.29	0.72	1.32	0.7	0.17	0.53	0.53	1.2	0.94	-0.66	0.94	1.03	-0.73	1	0.98	1.05
RP0588	1.88	0.6	0.87	1.23	0.67	1.23	1.32	0.75	0.67	1.22	0.67	0.86	2.05	0.19	0.64	1.77	0.14	0.49	1.34	0.55	0.64	0.41	0.41	0.49	-0.94	0.48	-1	-1	-1	0.82	0.58	0.42	0.05	0.35	0.52	-0.23	0.06	0.32	-0.1	-0.24	-0.22	0.11	0.94	1.21	1.53	0.3	1.17	1.11	0.38
RP0589	2.87	2.14	3.28	1.79	0.58	1.82	0.99	0.81	1.06	1.32	0.95	1.66	1.11	0.97	1.31	1.42	0.77	1.38	1.73	1.07	0.85	0.82	0.73	0.88	0.95	0.46	1	1	-0.34	-0.21	0.86	1.18	1.16	1	0.94	0.79	1.02	1.08	0.65	1	0.96	0.36	0.82	1.01	1.67	0.79	1.21	0.97	0.95
RP0590	1.2	0.91	-0.1	0.56	-0.12	0.57	0.89	1.08	0.48	0.33	1	0.86	0.7	0.88	0.14	-0.02	0.75	0.48	0.75	0.48	0.07	0.63	0.26	0.53	0.99	-0.55	1	1	-1	-0.8	-0.34	-0.79	0.57	1	-1.19	-0.39	0.52	-0.87	0.25	1	-0.58	-0.83	0.47	0.42	1.25	0.59	0.56	0.56	0.25
RP0591	1.02	0.64	0.14	0.8	-0.58	-0.22	0.91	-0.93	-0.48	0.44	-0.38	-0.15	0.94	-0.71	-0.19	0.42	-0.44	-0.43	1.4	-0.42	-0.34	-0.5	-0.32	-0.15	0.99	0.04	1	1	-0.63	-0.45	0.55	0.69	0.17	1	-0.25	-0.18	0.99	0.11	-0.17	1	0.46	-0.58	0.49	0.78	1.2	0.8	0.81	0.92	0.25
RP0592	1.68	0.91	0.34	0.26	1.34	1.2	0.76	1.38	1.36	0.63	1.82	1.63	-0.07	1.11	0.68	-0.14	1.24	0.82	0.93	0.73	0.17	0	0.15	0.13	1	0.38	-1	1	0.02	-0.79	0.87	0.92	0.41	1	0.67	0.01	1.01	0.2	-0.37	1	0.72	-0.42	0.5	0.72	1.41	0.76	1.25	-0.91	0.81
RP0593	2.62	2.36	1.06	0.22	1.82	0.9	0.03	1.69	0.74	-0.35	0.81	0.54	0.29	2.03	0.76	-0.43	1.14	0.74	0.84	-1.63	-1.79	-0.01	-0.19	-0.18	1	-0.05	-1.59	1	0.7	-1.02	0.14	0.29	-0.86	1	-0.99	-1.17	0.71	-0.42	-1.1	1	-0.34	-1.26	0.4	0.77	-0.59	0.75	0.08	-0.76	0
RP0594	1.26	1.39	0.36	1.31	0.99	0.98	0.03	0.51	0.22	0.28	0.58	0.68	-0.36	0.2	-0.15	0.37	0.28	0.34	1.34	0.16	0.37	0.26	0.76	0.75	1	0.21	1	1	-1	-0.92	0.93	0.18	0.36	1	0.57	-0.54	0.98	-0.43	1.19	1	0.36	-0.57	0.75	1.77	1.32	0.95	1.63	-0.28	0.85
RP0595	1.54	1.06	0.78	0.93	1.69	1.44	1.94	1.14	1.66	1.95	1.65	2.12	1.36	1.67	1.3	1.46	1.88	1.77	1.53	1.38	1.23	0.94	0.87	0.87	1	0.38	1	1	-0.32	-0.02	0.85	1.02	1.14	1	0.58	0.94	1.03	1.2	1.36	1	0.72	0.87	1.01	1.25	1.36	0.96	1.18	0.84	1.1
RP0596	1.5	-0.18	-2.23	0.74	-0.78	-0.54	1.44	0.92	0.96	1.8	1.19	1.48	0.77	0.73	-0.14	1.49	0.43	0.75	0.98	1.49	1.08	1.01	0.31	0.82	0.98	-0.39	1	1	-0.89	-0.78	1.01	0.4	0.4	1	0.84	-0.6	0.98	0.05	0.8	1	0.56	0.04	1.1	0.42	1.44	0.94	1.21	0.55	0.91
RP0597	1.51	-0.16	0.22	1.55	1.23	1.7	1.31	0.66	1.32	1.17	1.01	1.42	1.49	1.24	1.68	1.59	1.49	1.75	1.85	1.09	1.29	0.97	0.93	0.98	1	1.1	1	1	-0.05	1.03	0.99	1.22	1.18	1	1.16	1.04	1.03	1.76	1.16	1	1.17	1.17	1.02	2.08	1.65	1	0.66	1.2	1.08
RP0598	2.02	1.77	1.77	2.43	1.75	1.79	0.32	0.34	0.5	0.57	0.4	0.49	0	0.04	0.48	0.65	0.05	0.09	1.98	0.68	0.62	1.03	0.88	1.08	1	1.15	1	1	-1	-0.05	1.05	0.22	1.08	1	0.82	0.17	1.01	-0.26	1	1	0.62	0.13	1.09	2.45	1.39	1	1.82	0.89	1.01
RP0599	1.75	0.71	0.42	-0.04	0.11	0.19	0.42	0.29	-0.01	-0.15	0.05	-0.28	0.57	1.04	0.54	0.73	0.51	0.23	0.39	-1	-0.08	-0.73	-0.67	-0.79	-0.85	-0.61	-1.01	-1	-1.01	-0.32	-1.03	-0.7	-1.19	-0.74	-1.02	-1.01	-1.5	-0.72	-1.28	-1.23	-1.53	-0.47	-0.35	0.13	0.92	-0.92	-0.04	0.23	-0.85
RP0600	1.6	2.15	1.91	1.34	1.3	1.18	1.05	2.26	2.02	1.2	1.84	1.93	1.1	2.3	2	1.32	1.65	1.7	1.44	1.46	1.1	0.96	1.41	1.18	1.04	0.13	1	1	1	-1.01	1.16	0.82	1	1	1	-0.31	1.02	-0.44	0.87	1	1	-0.64	0.95	1.29	1.08	0.98	1.91	1.14	1.16
RP0601	2.14	0.36	0.7	1	-0.04	0.69	0.96	0.36	1.04	1.22	0.46	0.7	1.34	0.04	0.83	1.12	0.25	0.66	0.2	-0.44	-0.68	0.68	-0.14	0.4	1	-0.36	-1.2	1	-0.75	-1.08	-0.59	0.3	-0.26	1	-1.07	-1.11	0.65	0.12	-1	1	-0.77	-1.45	0.57	-0.17	1.11	0.66	0.03	-0.68	0.17
RP0602	2.8	1.57	1.42	1.36	0.66	0.86	2.01	1.76	1.54	2.13	1.59	1.83	2.21	1.7	1.62	2.2	1.43	1.44	1.85	1.96	1.47	1	1.28	0.94	0.96	1.21	1	1	-0.92	1.05	0.86	0.14	1	1	-0.42	1.97	0.91	0.45	0.9	1	0.75	1.44	0.89	2.26	1.24	1.04	1.04	1.02	1.26
RP0603	2.87	1.83	1.9	2.32	1.38	1.75	2.08	2.26	2.45	2.37	2.13	2.47	2.23	1.93	2.14	2.5	1.67	1.96	1.71	2.22	1.52	1.17	0.27	0.57	0.68	-0.14	-0.84	1	1	-1	0.95	0.6	-0.65	1	1	-1	0.77	-0.45	-1	1	1	-1	1.07	2.73	1.87	0.95	2.84	1.23	1.37
RP0604	0.31	-0.34	-0.92	-0.58	-0.48	-0.59	-0.49	-0.27	-0.55	-0.65	0	0.02	-0.49	-0.67	-1.3	-1.09	-0.41	-0.63	0.85	0.32	0.4	0.96	0.68	0.95	0.98	0.22	-0.26	1	1	-1.05	0.98	1.14	1.23	1	1	-0.28	0.92	-0.08	0.94	1	1	-1.02	1.03	1.15	0.49	0.98	1	-0.27	0.8
RP0605	0.53	-0.15	-0.04	-0.12	-0.54	-0.14	-0.1	-1.68	-0.95	-0.68	-1.01	-0.83	-0.07	-1.13	-0.62	-0.53	-1.03	-0.65	0.27	-1.38	-1.14	0.53	-0.5	0.25	-0.01	-0.21	-1	1	1.22	-1	-0.25	0.39	-1	1	-0.99	-1	-0.37	-0.54	-1	1	-0.44	-1	-0.18	1.22	1.69	0.47	1.89	-0.33	-0.68
RP0606	0.86	3.36	2.48	1.47	2.22	1.75	1.38	0.7	0.97	1.31	0.77	1.1	0.55	1.17	0.71	1.26	0.97	1.12	1.94	0.98	1.09	0.4	0.85	0.88	1	1.05	1	1	-0.93	0.99	0.76	0.32	0.73	1	-0.02	0.89	0.83	1.19	1.26	1	-0.31	1.06	0.96	2.08	1.75	1.02	0.87	1.07	0.93
RP0607	1.81	1.81	2.07	1.01	2.94	2.4	0.79	0.86	0.73	0.14	0.5	0.22	1.48	1.06	0.97	0.62	1.32	0.61	1.19	0.17	1.01	-0.43	0.46	0.2	-0.78	0.55	-1	-1	-1.03	0.79	0.64	0.53	0.26	0.69	0.24	0.15	0.31	0.9	0.58	0.21	-0.51	0.62	0.19	1.13	1.22	-0.38	0.99	0.92	0.6
RP0608	0.81	2.17	1.33	1.78	1.77	1.55	1.2	1.34	1.18	1.31	1.37	1.57	0.84	1.51	1.02	1.21	1.4	1.25	2.11	1.31	1.15	1.08	1.29	1.32	1	1.12	1	1	-0.09	0.97	1.15	1.03	0.71	1	1.16	0.42	1.03	1.25	1.15	1	1.13	0.99	1.19	1.18	1.43	0.98	0.91	1.25	1.13
RP0609	1.73	2.76	3.06	1.66	2.81	2.71	1.15	1.4	1.49	0.72	0.99	0.8	1.69	1.65	2.2	0.8	1.27	1.01	1.89	1.29	1.29	0.15	0.94	0.85	-0.93	0.62	-1	-1	-0.99	1.03	0.88	0.71	0.8	0.74	0.71	1.22	0.56	1.41	0.7	0.39	0.25	1.22	-0.26	1.92	1	-0.59	1.07	0.93	1.02
RP0610	1.23	2.42	2.15	0.61	1.63	1.22	0.33	0.99	0.82	0.14	0.53	0.19	1.16	1.43	1.51	0.81	1.25	1.02	1.04	-0.58	0.21	0.9	0.43	0.69	-0.86	-0.38	-1	-1	-1.01	0.16	-0.62	-0.92	-1.49	-1.11	-0.79	0.46	-0.68	-0.65	-1.21	-1.06	-0.45	0.45	0.16	0.82	1.12	-0.36	1.22	0.86	-0.17
RP0611	0.65	0.25	0.79	1.01	-0.02	0.89	0.42	0.61	0.99	0.5	0.78	0.91	1.1	0.54	1.33	1.02	0.74	1.04	1.1	0.59	0.8	1.02	0.97	1.2	1	-0.36	1	1	-0.5	-0.76	0.93	0.62	0.45	1	0.66	0.14	1.01	0.45	1.04	1	0.47	0.2	1.14	0.56	1.62	1.02	1.04	0.6	0.94
RP0612	1.35	0.98	1	1.12	1.31	1.72	2.42	2.01	2.49	1.76	1.69	1.83	2.38	1.98	2.71	1.84	1.99	2.19	1.78	1.62	1.53	-0.38	0.44	-0.01	0.96	1.26	1	1	-0.08	0.73	0.96	1.15	1.21	1	0.89	1.32	0.98	1.79	1.34	1	0.29	1.01	0.3	1.41	1.37	0.62	1.15	0.88	0.76
RP0613	1.41	1.13	-0.16	-0.22	0.98	0.38	0.26	1.68	0.94	0.68	1.57	1.14	0.02	1.66	0.66	0.2	1.66	0.86	1.97	1.87	1.7	0.89	0.91	0.89	0.89	1.35	1	1	0.23	1.03	0.94	1	1.03	1	0.74	1.73	0.86	0.77	0.75	1	0.73	1.34	0.69	1.7	1.33	0.88	1.44	1.11	0.96
RP0614	1.2	0.98	0.63	1.16	0.16	0.71	1.87	0.76	1.27	1.65	0.55	1.23	1.51	0.61	0.89	1.72	0.23	1.12	2.31	0.48	0.6	0.97	0.54	0.67	-0.91	0.94	-1	-1	-0.98	1.05	0.31	-0.97	-1.15	0.12	-0.1	-0.2	-0.26	-0.98	-1.08	-0.29	0.01	0.6	0.39	2.28	0.99	-0.5	1.42	1.15	0.49
RP0615	1.6	2.1	2.26	0.7	0.6	0.21	1.06	0.85	0.62	0.68	0.3	0.4	1.44	1.2	1.27	1.37	0.3	0.33	1.42	0	0.32	0.45	0.28	0.56	0.92	0.19	1	1	-1.02	-0.24	0.78	0.07	0.39	1	0.37	-1.21	0.82	-0.53	0.98	1	-0.2	-0.94	0.89	0.98	1.37	0.84	1.46	0.76	0.44
RP0616	1.18	3.24	2.25	1.32	2	1.49	2.13	1.54	1.91	2.07	1.57	2.13	0.69	1.95	1.25	1.51	1.69	1.98	2.26	1.18	1.39	1.03	0.57	0.85	1	1	1	1	-0.77	0.92	0.28	-0.05	0.87	1	-0.72	0.58	0.83	0.55	1.31	1	-0.26	0.6	1.23	1.05	1.94	1.01	1.01	1.29	0.67
RP0617	2.64	2.4	2.74	2.45	2.34	2.33	2.26	1.44	1.6	1.94	1.5	1.67	2.65	1.28	1.85	2.49	1.66	1.95	1.89	1.5	1.53	0.86	0.91	1.05	0.94	1.14	1	1	-1.03	0.79	1.03	0.72	1.21	1	0.82	0.75	1.02	1.26	1.22	1	0.49	0.57	1.33	1.81	1.47	1.02	1.47	1.2	0.96
RP0618	1.58	2.31	1.52	1.14	1.73	1.41	0.97	1.51	1.24	0.91	1.25	1.16	0.42	2.6	2.12	1.2	2.35	2.03	2.08	0.86	1.35	0.06	0.63	0.53	-0.97	-1	-1	-0.99	-1.02	0.59	0.66	0.44	0.57	0.7	0.24	0.74	-0.24	0.69	0.22	-0.36	-0.81	0.72	0.77	2.27	1.44	0.84	1.94	0.98	0.73
RP0619	2.29	2.12	1.01	1.98	3.36	2.89	1.95	1.58	1.55	1.96	1.72	1.9	1.82	1.86	1.44	1.65	2.05	1.86	2.19	1.84	1.6	0.49	0.95	0.79	1.01	1.97	1	1	-1	0.96	1.09	0.86	1.04	1	1.04	1.23	1	1.4	1.14	1	0.69	1.39	1.24	2.98	1.3	1.02	1.65	1.13	1.22
RP0620	1.01	0.66	0.54	0.39	0.15	0.24	0	0.05	0.29	-0.16	-0.19	-0.27	0.29	0.15	0.37	0.38	-0.67	-0.33	-0.44	-0.86	-0.83	-1.92	-1.44	-2.14	-0.93	-1.12	-1	-1	-1.06	-1.11	-0.54	-0.1	-0.31	-0.77	0.01	-0.59	-0.76	-0.29	-0.61	-0.94	-0.46	-0.45	-1.17	-0.34	1.16	-1.1	-1.86	-1.71	-1.16
RP0621	0.42	1.35	0.62	0.51	0.65	-0.12	0.97	1.38	1.06	1.48	1.26	1.27	0.09	0.63	-0.13	0.55	0.09	-0.12	0.52	1.1	-0.32	0.06	-0.12	-0.02	-1.12	-1.26	-1	-1	-1.02	-1.06	0.33	-0.11	-0.29	-0.14	0.48	-0.94	-0.29	-0.93	0.01	-0.63	0.14	-0.74	0.38	-0.28	1.28	0.03	1.17	-0.62	0.22
RP0622	2.83	0.35	-0.4	0.97	0.26	-0.06	1.32	0.53	0.5	1.29	0.78	1	2.05	0.66	0.65	1.69	0.98	1.03	1.88	0.87	1.45	0.11	0.5	0.43	0.98	1.15	1	1	-0.55	0.85	0.95	0.79	0.69	1	0.79	0.11	0.97	1.58	1.1	1	0.33	0.81	0.78	1.48	1.35	0.85	1.15	1.03	0.71
RP0623	2.12	2.19	1.37	1.49	2.46	2.46	0.17	1	0.83	0.46	0.72	0.7	0.63	1.48	1.21	0.7	1.33	1.25	0.45	-0.72	-0.83	1.03	0.87	1.14	1	0.22	-1	1	-0.36	-0.57	0.78	0.38	-0.72	1	0.22	-0.55	0.73	-0.18	-0.89	1	0.12	-0.39	1.14	1.03	0.81	1.02	1.07	-0.64	0.78
RP0624	0.61	-1.06	-0.87	0.31	-0.91	-0.43	1.48	0.35	0.78	1.47	0.55	1.18	0.49	-0.44	0.07	0.49	-0.05	0.35	-0.12	0.59	0.24	-0.75	0.09	-0.32	-0.81	-0.69	-1	-0.99	-0.95	-1.06	0.57	0.41	0.46	0.39	0.47	-0.04	0.23	-0.08	-0.19	-0.17	-0.23	-0.36	-0.4	-0.78	0.96	-0.51	-0.96	-0.27	0.31
RP0625	0.02	0.59	-0.79	0.22	0.86	0.2	0.06	0.02	-0.18	-0.76	-0.1	-0.42	-0.37	0.01	-0.69	-0.9	0.24	-0.64	-0.95	-0.79	-0.96	-1.13	-0.75	-0.82	-0.88	-1.23	-1	-1	-0.56	-0.81	-0.19	0.1	-0.38	-0.11	-0.7	-0.32	-0.22	-0.3	-0.7	-0.67	-0.25	-0.34	-0.38	-0.71	0.81	-1.34	0.95	-0.15	-0.28
RP0626	2.49	2.58	1.88	1.65	2.07	2.03	1.41	0.79	1.08	1.35	1.17	1.42	1.85	1.3	1.14	1.41	1.43	1.6	1.83	1.02	1.15	0.36	0.58	0.58	1	1.03	1	1	-0.61	0.9	0.92	0.62	0.97	1	0.66	0.49	0.87	1.03	1.38	1	-0.04	0.78	0.86	1.55	1.34	0.94	0.96	1.1	0.77
RP0627	1.81	1.7	2.29	0.64	1.15	0.7	0.64	0.26	0.73	0.74	0.14	0.55	-0.05	0.8	0.89	0.26	0.61	0.56	0.53	0.33	0.48	-0.28	-0.17	-0.15	-0.97	-0.39	-1	-1	-1.01	0.07	-0.6	-0.51	0.31	0.3	-1.15	-0.19	-0.17	-0.36	0.22	-0.04	-1.03	-0.27	-0.25	-0.16	1.02	-0.65	1.07	0.33	-0.04
RP0628	1.18	0.83	0.51	0.88	0.68	0.89	-0.35	0.12	0.21	0.41	0.26	0.56	-0.34	0.71	0.04	0.59	0.31	0.7	1.72	0.66	0.74	0.97	0.83	0.97	0.91	1.2	1	1	1	-0.05	0.91	1.37	1.22	1	1	1.01	0.85	1.62	1.14	1	1	0.88	0.96	1.76	1.07	1	1	1.29	0.91
RP0629	1.24	0.21	-0.46	0.16	1.06	1.29	0.08	0.75	0.46	0.17	0.7	0.6	0.25	0.15	0	0.01	0.41	0.12	1.43	0.42	0.37	-0.19	0.56	0.49	-0.82	0.74	-1	-1	-0.97	0.96	0.69	0.43	0.02	0.37	0.76	-0.35	0.3	0.3	-0.03	-0.15	0.47	0.3	0.02	1.43	1.15	-0.21	0.97	0.93	0.48
RP0630	0.73	0.64	0.52	0.46	0.76	0.51	0.63	-0.01	0.24	0.84	0.44	0.9	0.69	-0.11	-0.08	1.01	0.33	0.35	1.28	1.31	1.02	0.94	0.8	0.89	1.01	0.12	1	1	-0.21	-0.33	0.81	1.07	1.12	1	0.51	0.98	0.96	1.17	1.28	1	0.23	0.74	0.99	0.32	1.64	0.95	1.17	0.71	1.07
RP0631	2.31	1.99	1.34	1.22	1.83	1.69	1.71	1.31	1.56	1.73	1.39	1.54	1.63	2.13	1.77	2.16	1.91	1.96	1.4	1.06	1.4	0.05	0.65	0.58	-1.05	0.48	-1	-1	-1	0.98	0.54	0.22	0.5	0.59	-0.03	0.88	0.31	0.78	0.33	0.19	-0.09	1.11	-0.38	1.32	0.88	-0.66	0.13	0.97	0.72
RP0632	1.67	1.95	1.76	0.91	1.59	1.36	0.82	1.68	1.52	0.74	1.38	1	0.67	2.23	2.09	0.57	1.74	1.14	2.05	1.17	1.25	0.68	1.04	0.9	-0.95	-1	-1	-0.96	-1	0.65	1	0.68	0.83	0.85	0.91	1.06	0.84	0.68	1.24	0.83	0.8	1.15	0.75	2.49	1.59	1.38	1.86	1.2	1.05
RP0633	0.87	0.49	0.21	0.41	1.06	1.28	1.36	0.08	0.94	1.35	0.83	1.56	0.7	0.19	0.12	0.68	0.92	1.15	1.15	0.68	0.48	0.94	0.5	0.76	1	0.47	-1.26	1	0.28	-0.7	0.5	1.13	0.21	1	-0.48	0.77	0.99	1.51	0.37	1	0.35	0.37	1.02	1.25	1.48	0.96	1.31	-0.58	0.86
RP0634	3.36	3.29	3.42	3.09	2.15	3.08	3.34	1.33	2.08	2.62	0.98	1.73	3.61	2.22	2.98	3.42	1.54	2.29	1.98	0.89	1.07	1	1.23	1.01	0.99	1.73	1	1	1	1.05	1.07	1.37	0.55	1	1	1.06	0.97	1.72	1	1	1	1.31	1.03	2.28	1.03	1.04	2.12	1.09	1.26
RP0635	2.32	0.72	1.58	1.97	1.51	1.49	1.72	0.61	1.07	1.39	0.66	1.04	2.41	0.57	1.22	2.05	0.87	1.23	2.21	0.8	1.8	0.66	0.64	0.82	-0.77	1.22	-1	-1	-0.98	0.57	0.81	0.16	0.15	0.86	0.47	-0.09	0.53	1.08	0.8	0.48	-0.22	0.89	1.28	1.99	1.71	0.35	1.63	1.13	0.8
RP0636	1.3	1.9	1.45	1.37	1.18	1.35	1.46	1.21	1.35	1.53	1.28	1.74	1.53	1.45	1.48	1.71	1.32	1.61	1.74	1.43	1.27	1	1.53	1.2	0.94	1.11	1	1	1	-0.2	1.15	1.02	0.49	1	1	0.01	1.02	0.06	0.33	1	1	0.02	0.99	1.76	1.06	1.01	1.92	0.79	1.19
RP0637	0.75	2.6	2.3	1.72	2.02	1.55	1.45	1.47	1.42	1.22	1.28	1.16	1.2	1.93	1.9	1.09	1.62	1.15	1.87	1.45	1.32	1.01	1.13	1.12	1	1.24	1	1	0.33	0.99	1.1	1.22	1.18	1	1.19	1.35	1.05	1.38	0.95	1	1.09	1.21	1.14	1.92	1.6	1.02	0.94	1.24	1.17
RP0638	2.01	1.11	2.04	0.45	0.69	0.39	0.87	0.88	0.55	0.79	0.46	0.6	1.51	1.35	1.38	1.15	0.29	0.58	1.4	0.54	1.1	-0.09	0.21	0.18	-0.91	0.66	-1	-1	-1.05	0.66	0.28	0.25	0.28	0.41	-0.08	0.33	-0.19	0.58	0.51	-0.37	-0.84	0.49	0.53	1.25	1.38	-0.14	1.27	0.96	0.24
RP0639	3.15	2.49	2.72	1.1	1.84	1.57	0.95	0.99	0.97	0.61	1.02	0.92	1.48	1.4	1.1	0.81	1.44	1.04	1.79	0.56	0.88	-0.31	0.38	0.21	0.99	1.02	1	1	-0.64	0.83	0.73	0.9	0.61	1	0.08	0.68	0.95	1.37	1.1	1	0.11	0.79	0.75	1.42	1.25	0.69	-0.66	0.91	0.77
RP0640	0.24	0.03	-0.16	0.51	-0.49	0.1	0.42	0.09	0.27	1.1	0.03	0.56	0.19	-0.32	-0.16	0.61	-0.32	0.06	0.64	0.83	0.33	-0.27	0.41	0.28	0.97	-0.51	1	1	-0.52	-0.84	0.78	0.33	1.08	1	0.09	0.42	0.97	-0.41	0.9	1	0.73	-0.37	0.42	0.36	1.2	0.89	0.83	-0.59	0.87
RP0641	2.4	0.88	1.71	2.06	1.89	2.2	1.3	0.41	0.52	1.31	0.93	1.17	1.63	0.25	0.46	1.22	0.63	0.8	1.34	0.74	0.46	0.29	0.6	0.58	0.99	0.39	1	1	0.33	-0.33	1.02	0.92	1.16	1	1.08	0.42	1.04	0.02	0.74	1	1.13	-0.24	0.72	1.07	1.25	0.93	1.14	0.75	0.89
RP0642	2.53	2.59	2.67	1.56	2.59	2.59	1.73	1.38	1.39	1.34	1.53	1.65	2.17	1.63	1.73	1.47	1.43	1.45	1.89	1.43	1.01	1.03	1.09	0.98	1	1.26	1	1	0.11	1.03	0.97	0.96	0.52	1	0.83	1.4	0.88	0.22	-0.11	1	1.02	0.58	1.05	1.74	1.39	1	1.29	1.24	1.01
RP0643	2.22	0.91	0.06	2.26	1.76	1.99	1.51	1.33	1.29	1.66	1.51	1.72	1.46	1.44	1.27	1.54	1.62	1.62	1.85	1.75	1.49	1.03	1.25	1.12	1	1.31	1	1	0.15	0.97	1.14	1.29	1.24	1	1.06	1.72	1.04	1.72	1.13	1	1	1.33	1.15	1.78	1.72	1	1.32	1.28	1.22
RP0644	1.2	1.9	1.58	0.18	0.81	0.57	1.26	1.65	1.37	0.9	0.75	0.87	0.87	1.67	1.2	0.23	0.15	0.05	1.13	0.58	0.25	-0.48	-0.32	-0.27	-0.96	0.53	-1	-1	-1.05	0.53	0.56	0.15	-0.29	0.6	0.35	-1.16	0	-0.03	-0.22	-0.01	-0.53	-0.33	0.21	1.11	1.27	-0.34	1.11	0.91	0.3
RP0645	2.01	2.37	2.69	1.82	2.09	1.47	0.71	1.15	1.14	0.94	1.09	0.97	1.15	1.66	2.15	1.55	1.53	1.41	1.93	0.95	1.31	0.67	0.88	0.98	0.97	1.19	1	1	-1.01	0.8	1.03	0.57	0.6	1	0.86	-0.18	0.99	0.76	1.15	1	0.42	0.48	1.23	1.97	1.41	1.03	1.25	1.18	0.86
RP0646	2.61	2.54	2.27	1.54	2.92	2.61	0.83	1.39	1.23	0.57	1.21	0.91	1.53	1.89	1.45	0.81	1.85	1.48	2.65	1.01	1.16	0.16	0.72	0.45	-0.88	0.71	-1	-1	-1	0.91	0.82	0.83	0.73	0.74	0.62	1.06	0.32	1.47	0.45	0.05	-0.17	0.94	0.14	2.64	1.11	-0.53	1.59	1.06	0.91
RP0647	0.95	2.7	2.12	2.13	2.66	2.2	0.57	1.28	1.51	0.28	1.22	1.34	0.79	1.46	1.47	0.49	1.52	1.17	2.57	1.41	1.58	0.91	0.94	0.91	0.99	1.35	1	1	0.07	1.04	0.95	1.21	0.98	1	0.92	1.01	1.05	1.24	1.13	1	0.79	1.04	0.89	1.75	1.41	0.91	1.82	1.19	1.13
RP0648	2.57	0.47	0.77	1	1.44	1.24	1.94	1.11	1.37	1.54	1.27	1.52	2.46	1.5	1.81	1.56	1.68	1.69	2.22	1.31	1.51	1.01	1.14	1.05	1	1.04	1	1	-0.38	1.04	0.92	0.7	0.44	1	0.59	1.34	0.91	1.19	1	1	0.57	1.57	1.06	1.05	1.74	1.01	1.01	1.19	1.03
RP0649	0.64	1.7	1.53	-0.27	-0.51	-0.26	1.84	1.87	1.92	1.87	1.54	1.76	1.33	1.87	1.53	1.36	0.66	0.82	-0.3	1.69	0.57	0.48	0.29	0.41	-0.95	-1.34	-1	-0.99	-0.04	-0.83	0.77	0.3	-0.4	0.1	1.04	-0.65	0.29	-0.77	-0.82	-0.03	0.95	-0.36	-0.06	-1.17	1.2	-0.4	1.35	0.04	0.76
RP0650	2.64	2.38	2.82	2.78	2.61	3.48	1.7	2.13	2.33	1.46	1.96	2.09	2.1	2.09	2.33	1.69	2.3	2.6	1.62	0.82	1.21	0.78	0.2	0.7	0.94	1.12	1	1	-0.52	0.62	0.37	0.88	1.04	1	0.03	0.14	0.81	1.33	1.17	1	-0.28	0.25	0.75	1.37	1.48	0.73	0.54	1.12	0.54
RP0651	2.72	0.36	0.82	1.69	-0.07	0.63	1.8	0.13	0.85	1.44	0.73	1.25	2.61	0.5	1.31	1.72	0.9	1.38	2.04	1.08	1.64	1.03	0.67	0.98	1.01	1.06	1	1	-0.94	0.94	0.82	0.59	0.66	1	0.4	0.58	0.9	1.16	0.84	1	0.14	0.94	1.22	2.01	1.72	1.01	1.13	1.65	0.83
RP0652	2.15	0.67	0.97	1.52	0.16	0.99	1.76	0.52	0.73	1.49	0.1	0.6	1.71	0.48	0.93	1.7	0.21	0.81	1.36	0.69	0.73	0.98	0.83	0.97	0.92	1.32	0.02	1	1	-0.15	0.86	1.3	1.18	1	1	1.02	0.91	2.06	1.08	1	1	1.03	0.97	1.88	0.46	1.01	2.12	0.08	0.89
RP0653	0.49	1.99	1.55	0.4	1.36	1.47	-0.37	2.01	1.73	1.18	1.31	1.72	-0.29	2.16	1.76	0.8	1.38	1.53	1.11	1.17	0.8	0.97	0.82	0.88	1	0.21	1	1	0.7	-0.75	0.78	1.11	0.95	1	0.25	0.61	1.02	0.82	1.38	1	0.61	0.56	1	1.2	1.65	1	1.4	0.55	1.09
RP0654	1.77	1.17	1.14	0.59	1.81	1.28	1.8	1.58	1.71	1.46	1.46	1.47	2.18	1.89	1.93	1.8	2.07	1.91	2.41	1.41	1.43	1.03	1.09	1.2	1	1	1	1	-0.67	1.02	1.03	0.81	0.87	1	0.96	0.87	0.89	1.4	1.38	1	0.13	1.2	1.1	1.76	1.38	1	0.85	1.25	1.05
RP0655	2.52	1.58	1.73	1.15	0.57	1.05	1.8	0.02	0.22	1.4	-0.37	0.27	2.35	0.79	0.96	2.31	0.16	0.91	1.19	-0.13	0.64	0.92	0.67	0.76	0.99	-0.29	1	1	-1.01	-0.6	0.36	-0.11	-0.28	1	-0.74	0.27	0.54	0.16	0.4	1	-0.63	0.79	0.99	0.89	1.64	0.92	1.17	0.59	0.51
RP0656	1.77	2.95	1.4	0.85	2.27	1.71	0.81	1.54	1.31	1.1	1.32	1.33	0.81	2	1.31	1.04	1.54	1.38	1.82	0.87	1.25	1.03	0.57	0.99	0.99	0.02	1	1	-1	-0.25	0.62	0.32	0.71	1	-0.16	0.57	0.86	0.93	1.2	1	-0.31	0.63	1.12	1.06	1.94	1.01	1.19	0.83	0.72
RP0657	0.86	0.09	0.54	0.29	-0.17	0.29	0.85	-0.66	-0.03	0.22	-0.99	-0.48	0.82	-0.51	0.06	0.38	-0.68	-0.25	-0.1	-1.82	-1.48	1.03	0.53	0.92	-0.16	-0.49	-1	1	0.37	-1	0.18	0.07	-1.75	1	-0.49	-1	-0.18	-0.69	-1.44	1	0.17	-1	-0.49	0.17	1.67	0.98	1.43	-0.83	0.05
RP0658	0.89	1.2	0.09	0.89	0.49	0.66	1.45	0.63	1.03	0.98	0.6	0.86	1.86	0.65	1.14	1.25	0.44	0.74	1.86	0.62	0.98	0.42	0.79	0.84	1	1.1	1	1	-0.21	0.92	0.96	0.91	0.53	1	0.75	0.52	1.01	1.22	1.02	1	0.51	0.75	1.14	1.73	1.82	1.01	0.89	1.13	0.92
RP0659	1.92	0.16	0.33	1.17	-0.22	0.11	1.79	1.41	1.49	1.65	1.44	1.6	1.78	1.02	1.05	1.13	0.9	0.83	1.88	1.8	1.26	1.02	1.1	1.05	0.96	1.03	1	1	-0.5	0.77	1.15	0.89	0.94	1	1.1	0.45	1.04	0.5	1	1	1.14	0.66	1.09	1.72	1.44	0.95	1.17	1.26	1.17
RP0660	1.65	0.97	1.2	1.3	0.7	1.12	1.15	0.74	1.73	0.18	0.43	0.45	1.72	0.8	1.64	0.74	0.65	0.62	0.92	-1.07	-0.94	-1.63	-2.07	-1.97	-0.9	-0.03	-0.9	-1	-0.36	-1.15	-1.65	0.8	-1.41	-1.43	-1.09	-0.82	-0.82	0.97	-0.21	-1.2	-0.61	-1.13	-1.54	0.19	0.86	-0.98	-1.7	-1.03	-1.42
RP0661	1.21	1.37	0.43	1.11	0.42	0.34	-0.21	-0.22	-0.57	-0.8	-0.77	-1.01	1.24	0.22	-0.09	0.52	0.13	-0.15	1.56	-1.36	-0.27	-0.23	-0.65	-0.56	-1.02	0	-1	-1	-0.97	0.59	-0.19	-0.56	-0.86	-0.51	-0.42	-0.64	-0.4	-1.37	-0.21	-0.45	-0.59	-0.61	0.27	1.64	1.5	0.71	1.59	0.79	-0.71
RP0662	1.86	1.72	1.77	1.27	1.04	1.86	2.16	1.72	2.15	1.81	1.11	1.73	1.8	1.43	2.04	1.59	1.04	1.5	1.62	1.28	1.17	0.82	0.63	0.82	0.99	0.74	1	1	-0.55	0.45	0.76	1.04	1.19	1	0.61	0.78	1.04	0.86	1.3	1	0.77	0.46	0.78	1.25	1.49	0.79	1.25	0.95	0.9
RP0663	2.1	3.12	2.81	1.19	3.02	2.52	1.13	2.32	2.26	1.21	1.7	1.62	2.01	3.03	3.02	1.71	2.18	1.93	1.87	1.37	1.38	1.11	0.93	1.06	1	1.22	1	1	-0.13	1	1.01	0.93	0.9	1	0.91	0.9	1.03	1.13	0.97	1	0.81	1	1.21	1.85	1.75	1	1.24	1.24	1.02
RP0664	1.58	2.16	1.72	1.06	0.93	0.56	0.88	0.8	0.99	0.77	0.75	0.84	2.11	1.63	1.58	1.61	1.12	1.31	1.98	0.57	1.23	-0.01	0.29	0.02	-1.15	-1	-1	-1.02	-1.01	0.7	0.64	0.28	0.08	0.6	0.26	0.23	-0.26	0.07	-0.08	-0.41	-0.85	0.88	0.72	2.22	1.32	0.66	1.84	1.02	0.65
RP0665	1.48	3.75	2.96	0.67	4.45	3.64	2.38	3.13	3.08	1.58	2.25	2	2.19	3.29	3.55	1.57	2.79	2.15	1.23	0.16	-0.16	0.2	-0.03	0.15	1	-0.26	1	1	-0.47	-0.71	0.3	0.57	0.53	1	-0.91	0.15	0.93	0.16	0.47	1	0.03	-0.32	0.72	0.52	1.25	0.9	0.93	0.09	0.46
RP0666	1.28	0.22	0.75	0.6	0.01	0.68	1.26	0.15	0.79	0.31	-0.3	0.04	0.84	-0.19	0.4	0.36	-0.4	-0.07	-0.27	-1.48	-1.51	1.01	1.1	1.09	-0.06	-0.61	-1	1	0.41	-1	0.48	0	-1.74	1	0.14	-1	0.16	-0.75	-0.95	1	0.54	-1	-0.44	0.58	1.79	1.02	1.25	-0.58	0.5
RP0667	1.42	0.66	0.73	0.84	0.63	0.39	1.77	1.35	1.69	1.52	1.49	1.66	1.8	1.14	1.45	1.59	1.1	1.23	1.54	1.7	1.34	1.02	0.72	0.85	1.01	0.38	1	1	1	-0.97	1.17	0.81	0.64	1	1	-0.83	1.02	-0.42	0.33	1	1	-0.74	1.02	1.12	1.06	1.02	1.92	0.82	1.11
RP0668	1.73	2.92	1.79	1.55	3.01	2.38	1.17	1.56	1.4	0.97	1.32	1.15	2.38	2.58	2.58	1.61	2.16	2.27	2.27	0.99	1.26	0.2	0.67	0.56	-1.04	0.17	-1	-1	-0.97	0.75	0.73	0.46	0.52	0.64	0.48	0.67	-0.27	0.6	-0.17	-0.58	-0.66	0.9	0.96	2.04	1.44	0.26	1.54	1.1	0.8
RP0669	1.58	1.03	0.37	0.3	1.11	0.98	-0.96	0.13	-0.18	-1.48	-0.16	-0.42	0.07	0.44	0.31	-0.9	0.15	0.24	1.31	-1.75	-1.46	-0.64	-0.89	-0.84	-0.88	-0.95	-0.94	-1	-0.46	-1.03	-1.08	-0.67	-1.58	-1.05	-1.08	-1.58	-0.64	-1.06	-1.05	-0.88	-0.45	-1.4	-1.17	-0.01	1.15	-0.83	-0.78	-1.15	-1.1
RP0670	1.48	3.57	2.6	1.28	3.27	1.82	1	2.05	1.57	0.19	1.01	0.36	0.76	1.97	1.37	-0.1	1	0.11	1.02	-0.09	-0.41	-0.06	0.26	0.42	0.99	-0.47	1	1	-0.98	-0.67	0.39	-0.31	0.53	1	-0.64	-0.41	0.82	-0.8	0.16	1	0.24	-0.87	0.64	0.46	1.22	0.9	-0.12	-0.21	0.46
RP0671	1.33	2.47	1.79	1.01	1.5	1.48	0.24	-0.53	-0.43	0.3	-0.36	-0.16	-0.19	0.28	0.75	0.2	0.32	0.32	1.96	-0.56	0.35	1	0.54	1.05	-0.86	-1.81	-1	-0.96	-1	-0.27	0.53	-0.67	-0.27	0.17	0.08	-0.41	0.04	-1.59	0.23	0.02	-0.62	0.16	0.95	2.13	1.58	1.53	1.97	0.85	0.46
RP0672	1.89	1.74	-0.03	0.46	2.02	0.68	2.09	2.05	1.79	2.08	2.24	2.18	2.02	2.31	1.7	1.55	2.33	1.69	1.87	2.24	1.46	0.94	1.48	1.1	0.95	1.04	1	1	-0.23	1.03	1.13	1.21	1.23	1	1.15	2.29	1.04	2.11	1.19	1	1.19	1.52	0.8	2.27	1.27	0.97	0.58	0.97	1.38
RP0673	2.28	0.92	1.8	0.77	0.63	0.69	0.45	0.84	0.99	0.54	0.28	0.4	0.55	1.05	1.6	0.51	0.36	0.31	1.75	0.36	0.46	0.92	0.69	0.93	1	1.01	-1	1	1.03	-0.47	0.89	1.3	0.68	1	1.14	0.4	1.04	1.34	0.65	1	0.88	0.32	0.96	0.94	1.15	0.92	1.12	-0.33	0.92
RP0674	1.58	1.09	0.85	1.36	1.13	0.93	0.56	0.67	0.74	0.45	0.73	0.62	1.74	0.35	1.13	0.7	0.81	0.67	2.08	0.76	0.91	0.12	0.69	0.47	-0.73	-1	-1	-0.96	-1.01	0.59	0.67	0.21	0.2	0.32	0.45	0.99	-0.01	-0.42	0.03	-0.18	-0.41	1.06	0.64	2.29	1.48	0.85	1.91	0.97	0.71
RP0675	0.02	-0.12	-0.11	-0.46	-0.55	-0.55	-0.44	-0.75	-0.03	-0.66	-0.73	-0.37	-1.08	-0.69	-0.75	-1.7	-0.46	-0.85	-0.21	-2.19	-0.98	-1.94	-3.79	-2.93	-1.12	-0.53	-1.62	-0.76	-1.31	-1.04	-3.68	-1.87	-1.57	-3.23	-1.43	-3.49	-2.35	-1.11	-0.61	-1.7	-1.68	-2.84	-2.67	-0.42	-1.14	-1.74	-2.19	-1.48	-2.79
RP0676	1.36	0.75	0.6	0.93	0.49	0.73	0.84	0.58	1.04	0.3	0.3	0.78	0.94	0.25	0.61	0.61	0.13	0.46	1.64	0.46	0.6	0.98	1.11	1	1.01	0.45	1	1	1	-0.93	1.08	1.22	0.55	1	1	0.5	0.97	0.25	1	1	1	0.01	1.06	1.42	1	1.01	2.12	0.5	1.17
RP0677	1.52	1.54	1.62	1.55	1.76	1.4	2.29	1.29	1.44	2.04	1.51	1.61	2.34	1.8	1.51	1.76	2.04	1.71	1.93	1.38	1.69	1.03	0.65	1.07	-1.05	0.3	1	-0.5	-0.65	0.94	0.7	0.56	1.02	0.7	0.74	0.74	0.26	0.52	0.96	0.49	0.34	0.84	0.63	1.12	1.41	1	1.19	1.27	0.59
RP0678	2.41	2.37	1.93	2.6	2.69	2.97	1.68	0.93	1.1	2.04	1.22	1.72	1.73	1.8	1.74	2.72	2	2.6	2.26	1.17	1.45	0.46	0.73	0.73	0.98	1	1.02	1	-0.45	1.05	0.95	0.41	1.2	1	0.67	0.48	1.02	0.67	1.19	1	0.62	0.77	0.8	1.92	1.39	1.03	1.13	1.27	0.9
RP0679	2.25	0.72	0.69	1.62	1.34	2.28	0.94	0.59	1.06	1.17	1.38	1.57	1.31	0.18	0.64	1.42	1.22	1.76	1.81	1.32	1.22	0.29	0.62	0.61	1	1.07	1	1	-0.95	1.01	0.54	0.42	0.92	1	-0.42	0.98	0.74	1.32	1.19	1	-0.59	1.02	0.74	1.83	1.25	0.92	0.13	1.03	0.84
RP0680	2.03	2.22	1.78	1.76	1.89	1.54	2.44	1.26	1.85	1.79	1.25	1.66	1.99	1.86	1.92	1.84	1.57	1.62	1.86	0.88	0.95	0.98	1.09	0.99	1.01	1.73	1	1	1	1.04	1.02	1.37	0.9	1	1	1.1	0.92	2.1	1	1	1	1.19	1.01	2.16	1.01	1.02	2.12	1.17	1.15
RP0681	2.02	2.05	2.1	1.51	1.76	1.41	1.57	2.46	2.01	2.1	2.01	2.08	1.53	2.23	2.03	1.92	2.27	2.19	1.83	1.6	1.78	-0.45	0.26	0.16	-1.06	0.53	1	-0.67	-1	0.73	0.18	0.39	0.84	0.74	-0.25	0.91	0.13	1.29	1.11	0.44	-0.31	0.81	-0.63	0.99	1.71	-0.08	-0.33	0.82	0.3
RP0682	1.16	2.11	0.96	0.6	1.02	0.7	0.05	0.47	0.03	0.19	0.63	0.35	0.91	0.54	-0.05	0.3	0.74	0.24	1.02	0.45	1.05	-0.23	0.54	0.68	-0.76	0.77	-1	-0.96	-1.06	0.66	0.64	0.47	-0.06	0.22	0.71	0.24	0.21	0.61	0.68	-0.03	-0.07	0.74	0.48	0.95	1.32	0.34	1.17	0.96	0.46
RP0683	2.43	2.19	2.5	1.16	2.24	1.42	1.65	1.96	1.67	1.14	1.28	1.41	2.27	1.8	2	1.41	1.5	1.64	1.3	0.63	1.22	-0.61	0.32	0.31	-0.81	0.91	-1	-1	-1.01	0.75	0.39	0.64	0.18	0.66	-0.29	0.73	0.49	1.48	0.83	0.39	-0.21	0.62	-0.29	1.37	0.96	-0.47	0.92	0.83	0.48
RP0684	2.86	3.78	3.68	1.69	4.44	3.8	1.16	1.56	1.51	1.05	1.26	1.3	1.31	2.34	2.65	0.94	2.28	2.07	2.14	1.01	1.22	0.35	0.8	0.87	-0.83	0.85	-1	-1	-1.01	0.92	0.86	0.66	0.85	0.88	0.64	0.55	0.41	1.46	0.78	0.32	-0.4	0.87	0.75	1.91	1.36	0.11	1.17	1.07	0.91
RP0685	2.03	0.48	0.2	1.22	1.44	0.86	1.08	0.99	0.79	1.34	1.24	1.37	1.22	0.56	0.2	1.16	0.85	0.61	1.46	1.41	0.91	1	1.34	1.2	0.95	0.08	1	1	-0.05	-0.32	1.13	0.74	0.9	1	1.15	0.18	1	-0.11	0.72	1	1.18	0.32	0.85	1.09	1.31	1.01	1.01	1.21	1.15
RP0686	1.06	1.13	0.79	0.54	0.86	0.68	2.17	1.02	1.22	1.16	1	1.18	2.06	1.1	1.16	1.32	0.96	1.11	1.92	1.11	1.07	1	1.3	1.01	0.99	1	1	1	1	-0.32	1.07	1.37	0.78	1	1	1.3	0.97	1.48	1.07	1	1	1.24	1.04	1.14	1.03	1.04	1.01	1.04	1.31
RP0687	1.34	-0.25	0.36	0.48	-0.39	-0.08	1	-0.36	0.19	0.55	-0.57	-0.3	0.96	-0.47	0.05	0.63	-0.59	-0.5	0.53	-1.43	-1.36	1.01	0.51	1.03	-0.01	-0.22	-1	1	1.22	-1	0.53	0.5	-1.74	1	0.36	-1	0.09	-0.51	-0.95	1	0.52	-1	-0.27	0.98	1.63	0.94	1.6	-0.93	0.24
RP0688	1.88	1.03	1.56	1.18	0.32	0.9	1.9	0.88	1.34	1.66	0.68	1.4	1.99	0.74	1.29	1.66	0.53	0.92	1.78	0.56	0.64	0.91	0.63	0.88	0.98	1.45	1	1	0.8	0.89	0.89	1.28	1	1	1.18	0.59	0.99	1.27	0.46	1	1.09	0.38	0.95	1.79	1.66	0.91	0.99	1.24	0.84
RP0689	0.91	0.3	0.4	-0.07	-0.2	-0.1	1.23	0.6	0.97	1.03	0.58	1.09	1.58	0	0.25	0.97	-0.15	0.44	1.7	0.79	0.67	0.97	0.59	0.96	0.82	0.47	1	1	-0.88	-0.42	0.86	0.9	1.07	1	0.66	0.4	0.84	0.94	1.26	1	-0.28	0.03	1.01	1.02	1.49	0.85	1.46	0.76	0.78
RP0690	1.28	0.96	0.93	0.08	0.76	0.57	0.48	0.37	0.56	0.23	0.56	0.46	-0.22	0.17	0.09	-0.9	0.48	-0.07	1.3	0.39	0.1	1.01	0.94	1.01	-1.01	1.15	-1	-0.96	-0.46	0.96	0.72	-0.08	0.08	-0.08	0.91	1.02	0.3	-0.34	0.25	0.02	0.55	0.92	0.19	1.57	1.55	1.48	0.72	1.25	0.78
RP0691	0.73	-0.66	-0.09	0.3	-0.03	0.22	-0.97	-1.09	-1.11	-0.3	-0.25	-0.13	0.16	-0.7	-0.29	0.69	0.02	0.08	-0.04	-0.22	0.17	-0.52	-0.27	-0.03	-0.96	-0.23	-1	-1	-0.89	-0.51	0.24	0.83	0.22	0.21	0.46	-0.46	0.08	0.68	0.33	-0.22	-0.24	-0.36	-0.39	0.04	1.2	-0.55	1.19	-0.24	-0.05
RP0692	2.07	1.08	0.94	0.88	1.38	1.3	0.18	0.83	0.72	0.52	1.05	0.83	0.48	0.81	0.09	0.25	0.9	0.48	1.48	1.05	1.04	0.16	0.73	0.7	-0.89	0.49	-1	-1	-0.98	0.93	0.85	0.86	0.85	0.67	0.89	0.82	0.57	1.23	0.29	0.24	0.75	0.81	0.13	1.39	1.14	-0.36	0.96	1.05	0.88
RP0693	1.67	-0.62	-0.14	0.99	-0.23	0.8	0.96	0.48	0.49	1.3	0.86	1.28	0.81	0.21	0.3	0.79	0.5	0.77	0.93	0.45	0.24	0.69	0.65	0.8	0.97	-0.28	1	1	-0.3	-1.14	0.8	0.81	1.13	1	0.48	0.18	1.03	-0.05	1.02	1	0.71	-0.6	0.56	0.07	1.61	0.61	0.92	0.02	0.91
RP0694	1.16	1.87	1.94	1.08	1.11	0.92	0.16	0.24	0.21	-0.54	0.01	-0.71	0.52	0.61	0.51	-0.09	0.41	-0.43	1.13	-1.53	-1.28	-1.39	-1.38	-1.13	-1.05	-0.66	1	-0.8	-0.58	-1.1	-0.8	0.05	-0.36	0.3	-1.08	-1.52	-0.2	-0.7	-0.4	0.17	-0.49	-1.49	-1.49	-0.25	0.73	-0.69	-1.54	-1.38	-1.09
RP0695	1.31	1.64	1.15	1.47	1.73	1.38	0.64	1.13	1.06	0.26	0.99	0.7	1.75	1.6	1.75	1.34	1.61	1.56	0.52	0.37	1.08	0.08	0.39	0.37	-0.8	0.21	-1	-1	-1.07	0.39	0.71	0.65	0.22	0.63	0.56	0.08	0.43	1.25	0.82	0.15	-0.22	0.74	0.68	0.74	1.46	-0.28	1.29	0.96	0.65
RP0696	1.55	3.09	2.36	1.09	2.8	2.11	1.58	1.51	1.68	1.5	1.1	1.31	1.27	1.87	1.69	1.23	1.19	1.17	1.91	1.47	1.54	0.2	0.65	0.44	1	1.21	1	1	-1	0.91	0.99	0.76	0.82	1	0.79	0.89	0.92	1.47	1.14	1	0.17	1.18	0.91	2.01	1.39	0.97	1.02	1.07	0.99
RP0697	1.37	1.34	1.35	1.23	1.12	1.52	1.2	0.91	1.19	1.02	0.71	1.19	0.61	0.93	0.98	0.68	0.67	1.04	1.36	0.98	0.69	1	1.37	1.38	1.04	-0.05	1	1	1	-1	1.16	0.68	1	1	1	-0.92	1.02	-0.5	0.87	1	1	-1.09	0.84	0.63	1.1	0.93	1.51	0.74	1.03
RP0698	1.57	1.75	1.15	0.57	0.93	0.59	0.59	0.15	0.2	0.61	0.13	0.37	0.45	0.03	0.14	-0.05	0.03	0.04	1.55	0.01	0.48	1.03	0.63	0.98	-1.04	1.08	-1	-0.98	-0.88	0.88	0.34	-0.24	-0.48	-0.09	0.27	-0.07	-0.19	-0.66	-0.54	-0.35	-0.27	0.51	0.76	1.5	1.39	1.2	1.02	1.86	0.36
RP0699	2.6	2.18	2.89	2.01	3.44	3.19	0.91	2.05	1.51	0.83	1.07	0.96	2.33	3.79	3.56	1.57	2.5	1.94	2.08	0.45	1.17	0.79	0.85	1.27	-1.14	0.31	-1	-1	-1.01	0.93	0.64	0.13	0.17	0.47	0.46	0.18	-0.07	0.35	-0.08	-0.45	-0.15	0.96	1.13	1.92	1.74	1.16	1.51	0.91	0.65
RP0700	1.13	1.44	0.48	1	1.27	1.31	1.1	0.4	0.66	0.8	0.43	0.62	0.38	0.62	0.55	1.42	0.79	0.93	1.66	0.41	1.06	0.62	0.49	0.5	-1.24	0.14	-1	-1	-1	0.45	0.6	0.45	0.37	0.41	0.53	0.23	-0.28	0.53	0.07	-0.58	-0.72	0.48	1.07	1.48	1.8	1.03	1.6	1.04	0.51
RP0701	2.36	0.92	0.55	0.4	0.44	0.15	1.82	0.84	1.06	1.75	0.72	1.16	2.25	1.22	1.09	2.3	0.87	1.2	1.39	1.04	1.46	1.01	0.97	1.11	0.93	0.24	1	1	-1	-0.1	0.89	0.05	0.52	1	0.36	0.72	0.94	0.38	1.36	1	0.39	0.79	0.98	1.51	1.7	1.02	1.26	0.79	0.9
RP0702	1.99	1.33	-0.79	-0.22	0.9	-0.51	0.22	0.54	0.34	0.31	0.61	0.4	0.42	1.13	-0.18	0.34	0.75	0.22	1.51	0.7	0.42	0.76	0.39	0.78	1	0.42	1	1	0.35	-0.65	0.77	0.88	0.78	1	0.29	0.67	0.84	0.23	1.17	1	-0.06	0.22	0.66	0.68	1.34	0.7	1.71	0.36	0.57
RP0703	0.5	0.86	0.49	-0.98	-0.67	-0.48	-1.56	0.36	-0.65	-1.35	-0.46	-1.14	-1.31	0.96	-0.37	-0.88	-0.08	-0.86	-0.73	-1.82	-1.67	-1.6	-2.13	-1.84	-1.02	-1.8	-1.02	-1	-1.02	-1.2	-1.76	-0.94	-1.28	-1.23	-1.24	-1.92	-0.72	-1.26	-1.14	-0.53	-1	-1.84	-1.46	0.69	1.04	-1.65	1.82	-1.46	-1.86
RP0704	0.7	0.34	0.38	0.12	-1.13	-0.44	0.23	-0.43	0.36	0.23	-0.71	0.02	0.31	0.08	0.42	0.4	-0.41	0.23	-0.78	-1.41	-0.97	-1.42	-3.04	-2.37	-1.14	-1.16	-0.37	-1.03	-1.27	-0.99	-4.12	-2.47	-0.69	-3.3	-1.75	-1.59	-2.33	-1.39	0.17	-1.99	-1.94	-2.28	-2.05	-0.42	-0.24	-1.33	-2.37	-0.59	-2.89
RP0705	0.79	-0.41	-0.74	-0.2	-0.91	-0.74	-0.25	-1.36	-1.53	-0.26	-1.41	-1.11	-0.58	-1.65	-2.1	-0.47	-1.9	-1.95	0.74	0.04	-1.09	-0.69	-1.59	-1.29	1	-0.34	1	1	0.18	-1.05	-0.16	0.41	0.75	1	-1.02	-0.66	0.79	-0.37	0.75	1	-0.6	-1.23	0.05	0.28	1.61	0.55	-0.64	-0.74	-0.52
RP0706	-0.31	0.25	-0.12	-0.72	-0.12	-0.33	0.2	1.09	0.72	0.28	0.94	1.07	-0.03	1.18	0.61	-0.11	0.75	0.78	0.74	0.89	0.6	1.01	0.98	1.2	0.94	0.67	-0.67	1	1	-1.01	1.17	1.08	0.31	1	1	-0.43	1.02	0.11	0.28	1	1	-0.6	0.99	1.31	1.01	1.02	1.92	-1.09	0.92
RP0707	1.46	0.71	0.05	0.34	0.64	1	-0.57	0.48	0.24	-0.38	0.97	0.29	0.37	0.58	0.42	0.06	1.06	0.39	0.32	-0.19	-0.14	-0.41	-0.26	-0.03	0.97	0.27	-0.94	1	-0.78	-0.61	-0.44	0.22	-0.07	1	-1.18	-0.6	0.65	0.21	-0.47	1	-0.64	-0.81	-0.04	0.68	0.3	0.3	-0.64	-0.53	0.14
RP0708	1.4	0.92	0.63	0.85	0.92	1.05	1.13	1.01	1.03	1.2	1.18	1.49	1.23	1.18	1.13	1.49	1.28	1.45	1.4	1.24	1.16	0.97	1.3	1.21	1.04	0.06	1	1	1	-1.01	1.12	0.71	0.49	1	1	-0.87	0.98	-0.5	0.33	1	1	-0.72	0.97	0.98	1.07	0.99	1.91	0.74	1.02
RP0709	1.08	0.38	0.2	0.71	0.39	0.64	0.86	0.46	0.33	0.82	0.93	1.08	0.85	0.27	0.22	0.95	0.9	0.95	1.13	1	0.94	0.99	1.07	1	0.99	0.8	-0.07	1	1	-0.82	1.01	1.37	1.21	1	1	1.25	0.96	1.23	1.05	1	1	0.85	1.05	1.71	0.65	1.03	2.12	-0.25	1.13
RP0710	1.71	1.33	1.37	1.46	1.45	0.33	0.25	0.61	0.51	0.13	0.39	0.31	0.81	1.55	1.35	0.74	1.06	1.03	0.84	0.46	1.33	0.37	0.38	0.35	-0.77	0.6	-1	-1	-1.09	0.39	0.64	0.61	0.37	0.7	0.25	0.45	0.08	0.93	0.82	-0.05	-0.68	0.71	0.96	1.12	1.72	0.16	1.53	0.98	0.49
RP0711	1.38	1.51	1.02	1.33	1.15	1.15	0.93	0.84	0.98	0.94	0.82	1.2	0.97	1.17	1.09	1.19	1	1.09	1.77	0.74	0.68	0.79	1.58	1.32	1.04	0.03	1	1	1	-1	1.03	0.63	-0.38	1	1	-1.06	0.85	-0.48	-0.77	1	1	-0.8	0.46	0.46	1.2	0.63	0.9	0.6	0.97
RP0712	1.35	1.09	-0.02	0.82	0.53	0.37	0.02	1.1	0.35	0.12	1.18	0.78	0.17	0.82	0.03	0.74	0.92	0.69	1.76	1.43	1.08	0.97	0.84	0.88	1	0.83	1	1	0.74	0.05	0.79	1.16	1.08	1	0.25	1.11	1.02	1.34	1.17	1	0.61	1.04	0.97	1.55	1.29	1	1.42	0.83	1.11
RP0713	0.95	-0.22	-0.51	0.76	-0.92	0	0.02	-0.51	-0.52	0.29	-0.55	0.16	0.46	0.08	-0.45	0.63	-0.22	0.23	1.06	-0.21	0.14	0.7	-0.09	0.42	0.99	0.24	-0.47	1	-0.54	-0.61	-0.23	0.22	-0.5	1	-1.13	0.15	0.57	0.21	0.24	1	-0.57	-0.07	0.6	0.97	0.96	0.68	0.36	-0.01	-0.11
RP0714	0.48	1.96	1.49	-0.39	0.92	0.41	1.03	1.14	0.85	0.61	0.78	0.67	0.61	1.92	1.75	0.88	1.28	1.07	0.56	0.6	0.81	-0.74	0.37	0.2	-0.79	0.57	-1	-1	-0.99	0.77	0.49	0.16	0.66	0.76	-0.08	0.11	0.19	0.55	1.12	0.16	-0.9	0.57	-0.47	0.24	1.37	-0.75	2.02	-0.89	0.56
RP0715	2.4	2.66	2.26	1.51	1.93	1.46	2.53	2.09	2.09	1.5	1.55	1.44	2.64	2.42	2.46	1.86	1.81	1.52	2.06	1.24	1.09	1	1.38	1.02	1.02	1.73	1	1	1	1.05	1.06	1.2	0.55	1	1	0.88	0.97	2.47	1	1	1	1.15	1.03	2.33	1.07	1.04	2.12	1.02	1.37
RP0716	1.08	1.61	0.92	1.16	0.84	0.66	-0.34	0.25	0.66	-0.37	0.66	0.61	-0.03	0.43	0.23	-0.17	0.29	0.24	1.54	0.7	0.65	0.97	0.95	0.98	0.99	1	1	1	1	-0.32	1.07	1.15	1.13	1	1	0.33	0.98	0.54	1	1	1	0.28	1.04	1.7	1	1	1	0.68	1.05
RP0717	2.13	1.61	1.35	1.94	1.49	1.82	1.96	1.86	1.61	2.02	1.56	1.94	2.23	1.83	1.5	2.41	1.79	1.98	1.45	1.23	1.07	1	1.2	1.01	0.99	1.73	-0.07	1	1	0.58	1.01	1.26	1.23	1	1	1.59	0.96	2.34	0.98	1	1	1.36	1.04	2.26	0.66	1.04	1	0.19	1.23
RP0718	1.26	0.54	0.43	0.29	-0.49	-0.42	0.69	-0.6	-0.36	-1.14	-0.54	-0.75	1.86	-0.18	0.19	-0.49	-0.45	-0.41	-0.02	-1.22	-0.99	-1.48	-1.94	-1.29	-0.93	-1.14	-1	-1	-1.28	-1.42	-1.02	-0.33	-1.1	-0.56	-0.9	-2.36	-0.13	-0.92	-1.18	-0.26	-0.85	-2.08	-0.82	-0.48	-1.72	-0.82	-1.92	-2.03	-1.49
RP0719	0.14	0.23	-0.19	-0.37	0.31	-0.23	0.34	1.38	1.12	0.57	1.47	1.32	0.08	0.7	0.47	0.11	1.03	0.63	1.4	1.34	1.07	0.99	1.32	1.19	1.01	0.38	0.27	1	1	-1.03	1.17	0.96	0.77	1	1	-0.22	1.02	-0.22	0.88	1	1	-0.47	0.99	1.3	0.99	1	1.91	-0.07	1.13
RP0720	2.21	1.45	0.49	1.08	0.89	0.45	0.24	0.89	1.28	0.42	0.89	1.11	-0.47	0.77	0.79	-0.27	0.63	0.48	1.42	0.86	0.63	1.03	0.91	1.01	0.99	0.87	1	1	1.11	-0.37	1.07	1.16	1.21	1	1.21	0.39	1.03	0.17	0.74	1	1.1	-0.27	1.09	1.33	1.4	0.99	1.51	0.76	1.03
RP0721	0.23	0.08	-0.1	-0.36	0.17	-0.4	-0.66	0.06	-0.16	-1.27	-0.33	-0.94	-0.16	0.31	0.12	-0.79	-0.35	-0.69	-0.33	-1.46	-1.14	-0.7	-1.72	-1.1	-1.1	-1.29	-1.45	-1.15	-1.04	-0.99	-3	-1.92	-1.48	-1.75	-1.51	-2.26	-2.17	-1.49	-0.76	-1.29	-1.8	-1.79	-1	-0.61	0.78	-0.81	1.37	-1.13	-2.55
RP0722	2.22	1.64	1.83	1.74	0.9	1.7	1.81	1.54	1.91	1.88	1.54	2	2.2	1.18	1.5	1.88	1.07	1.32	1.94	2	1.28	0.99	0.95	0.9	1	1.27	1	1	0.42	1.05	0.78	1.17	1.05	1	0.17	1.39	1.02	2.18	1.07	1	0.65	1.31	0.99	1.96	1.27	1.03	1.27	1.16	1.2
RP0723	0.69	0.23	-0.04	0.12	-0.23	-0.14	0.95	0.78	1.02	0.99	0.81	1.25	0.89	0.93	1.12	1	0.77	0.95	0.31	0.69	0.43	0.93	1.53	1.25	0.68	-0.14	-0.84	1	1	-1	0.95	0.6	-0.65	1	1	-1	0.77	-0.45	-1	1	1	-1	0.4	1.14	-0.22	0.95	1.91	-0.34	0.94
RP0724	1.56	2.66	1.92	1.32	1.91	1.62	1.48	1.8	1.26	1.01	1.58	1.24	1.87	2.13	1.59	1.57	1.82	1.38	2.12	1.34	1.15	1	1.48	1.03	1.03	1.73	1	1	1	1.03	1.08	1.2	0.55	1	1	1.02	0.99	2.47	1	1	1	1.22	1.02	2.36	1.07	1.03	2.12	0.95	1.44
RP0725	2.34	2.02	2.02	1.9	0.77	1.32	2.4	1.15	1.37	2.23	0.82	1.52	2.28	1.09	1.24	1.93	0.62	1.06	1.88	1.34	1.21	0.94	0.59	0.83	1.01	-0.08	1	1	-0.12	-0.79	0.65	0.88	1.2	1	0.37	0.59	0.99	0.6	1.02	1	0.4	0.19	1	0.7	1.4	0.96	1.72	0.52	0.89
RP0726	1.79	2.5	2.62	1.04	1.94	1.7	0.29	0.56	0.8	0.35	0.74	1.06	0.51	1.56	1.54	0.76	1.33	1.2	2.07	0.79	1.15	0.92	0.66	0.96	1	0.67	1.02	1	0.26	-0.11	0.88	1.26	1.15	1	1.05	0.65	1.02	1.68	1.14	1	0.86	0.73	1	1.37	1.44	0.93	1.66	1.32	0.85
RP0727	-0.14	1.29	0.09	-0.94	0.71	-0.07	1.24	1.71	1.71	1.18	1.51	1.62	1.18	1.61	1.39	0.92	1.33	1.13	1.3	1.78	1.4	1.03	0.96	0.83	1.03	0.01	1	1	1	-0.99	1.15	0.67	0.81	1	1	-1.04	0.99	-0.5	0.33	1	1	-0.88	1.03	0.92	1.01	1	0.99	0.56	1.24
RP0728	1.83	1.87	2.09	0.3	0.79	0.45	0.14	0.82	0.52	-1.34	-0.71	-1.21	0.68	1.45	1	-1.24	-0.09	-0.81	-0.05	-1.51	-1.13	0.92	0.11	0.6	-0.91	-1.06	-1	-1	-0.15	-0.83	-0.53	-0.28	-1.54	-1.22	-0.24	-0.26	-0.21	-0.69	-0.95	-0.82	0.21	-0.69	0.08	-0.02	1.09	-0.44	1.29	0.48	-0.21
RP0729	0.08	0.99	-0.43	-0.2	0.9	-0.04	0.76	1.29	0.83	0.8	1.35	1.32	0.82	1.17	0.58	0.58	1.23	0.78	1.73	1.5	1.39	0.94	1.54	1.19	1.03	0.65	1	1	1	-0.77	1.13	0.91	0.49	1	1	-0.14	0.99	-0.22	0.33	1	1	-0.13	0.94	1.56	1.08	0.97	1.91	0.94	1.16
RP0730	1.48	1.47	1.16	2.02	0.08	1.05	0.14	-0.49	-0.74	1	0.21	0.77	0.35	0.01	-0.52	1.15	0.13	0.45	1.88	0.56	0.68	0.2	0.33	0.48	1	1.24	1	1	-1	0.91	0.63	0.75	0.24	1	-0.19	0.64	1	0.77	-0.13	1	0.57	0.3	0.83	2.07	1.24	0.93	1.04	1.06	0.68
RP0731	2.09	0.01	-0.46	1.64	0.62	0.51	1.1	0.8	0.53	1.58	0.53	0.84	1.89	0.8	0.52	1.6	0.66	0.62	0.37	0.28	0.35	-0.35	0.16	0.35	-0.86	-0.23	-1	-1	-1.04	0.24	-0.28	-0.34	-0.1	-0.05	-0.81	0.23	0.32	-0.53	0.57	0.25	-0.13	-0.38	-0.29	0.25	1.25	-0.67	0.17	0.23	0.11
RP0732	1.23	1.87	1.62	0.59	0.39	0.36	-0.64	-0.57	-1.09	-1.51	-1.16	-1.43	0.01	0.04	-0.24	-0.47	-0.5	-0.78	0.93	-1.1	-0.3	-0.77	-1.21	-1.15	-0.7	-0.55	-1	-1	-0.96	-0.31	-1.93	-1.3	-2.2	-1.54	-1.35	-0.34	-1.41	-1.17	-1.57	-1.2	-1.62	-0.18	-0.89	0.86	0.92	-1.19	0.29	-0.45	-1.43
RP0733	1.55	0.85	0.36	1.33	0.53	0.83	1.34	-0.55	0.08	0.8	-0.11	0.66	0.8	-0.42	-0.26	0.54	-0.3	0.14	1.59	-0.48	-0.12	0.92	0.43	0.91	0.99	0.03	1	1	1	-0.99	1.01	0.9	0.55	1	1	-0.75	0.96	-0.43	1	1	1	-1.66	1.02	0.38	0.93	0.93	0.98	1.09	0.6
RP0734	0.6	0.22	0.33	-0.12	-0.64	0.03	1.14	0.26	0.64	0.39	-0.37	0.31	0.76	-0.16	0.35	-0.28	-0.75	-0.36	0.06	-0.04	-0.83	0.98	1.07	1.1	0.87	-1.06	1.02	1	-0.36	-1	0.72	-0.67	0.44	1	0.01	-0.61	0.67	-1.13	0.4	1	0.56	-0.87	0.73	-0.02	1.46	1	1.21	0.75	0.78
RP0735	-0.06	-0.12	-0.99	-0.8	-1.22	-1.09	0.48	-0.13	-0.17	-0.88	-0.66	-1.03	-0.36	0.52	-0.21	-0.04	-0.27	-0.75	-0.86	-1.08	-0.51	-1.33	-1.1	-1.34	-1.17	-1.96	-1	-1	-1.08	-1.31	-1.32	-0.92	-0.63	-0.38	-1.33	-1.17	-0.94	-1.26	-0.28	-0.69	-1.37	-1.12	-1.4	-1.45	0.91	-1.35	1.45	-0.8	-0.92
RP0736	1.51	1.26	1.47	0.73	1.85	0.88	1.38	0.95	1.22	0.96	0.95	0.82	1.78	1.07	1.42	0.85	1.06	0.65	1.81	0.94	1.11	-0.04	0.31	0.05	-1.19	0.08	1	-0.9	-0.7	0.36	0.64	0.55	0.7	0.69	0.72	-0.09	0.09	0.44	1.22	0.32	0.08	0.4	0.09	0.49	1.33	0.34	1.07	0.68	0.5
RP0737	1.99	1.2	0.45	0.32	0.74	0.53	0.39	0.93	0.39	0.8	0.79	0.53	0.73	0.82	0.41	0.72	0.84	0.46	1.81	0.56	0.47	0.94	0.92	0.93	0.96	1.04	1	1	-0.38	1.05	0.86	0.6	0.03	1	0.44	0.75	0.83	-0.12	-0.4	1	0.92	0.32	0.67	1.14	1.52	0.79	0.64	1.45	0.84
RP0738	1.47	1.74	2.29	0.22	0.41	0.24	0.35	0.69	1.21	-0.04	0.03	0.21	0.35	1.34	1.57	-0.28	-0.14	-0.26	1.31	0.48	0.53	0.96	0.77	0.9	1	0.4	1	1	0.61	-0.48	0.99	0.94	1.09	1	1.09	0.25	1.05	0.1	1.19	1	1.06	-0.21	1.02	1.25	1.29	0.99	1.37	1.06	0.99
RP0739	2	3.06	2.62	1.83	2.47	2.44	-0.86	1.41	0.81	-1.13	0.73	-0.03	0.99	2.39	2.08	0.77	2.26	1.53	1.24	-0.62	0.89	0.87	0.57	0.77	-0.91	0.45	-1	-0.96	-0.98	0.96	0.31	-0.69	-0.73	0.38	-0.71	0.04	0.47	-0.37	0.58	0.45	-0.37	0.69	0.11	1.47	1.19	0.66	1.16	1.2	0.45
RP0740	1.34	1.26	0.84	-0.64	0.54	-0.08	0.17	0.18	-0.21	-0.78	-0.02	-0.59	-0.02	0.06	-0.3	-0.71	0	-0.49	-0.67	-1.1	-0.8	-0.72	-0.79	-1.13	-1.05	-1.29	-1	-1	-0.99	-0.85	-0.85	-0.07	-1.51	-1.14	-0.52	-0.56	-1.08	-0.15	0.48	-1.24	-0.85	-0.32	-0.45	-1.35	1.01	-0.82	1.04	-0.21	-0.8
RP0741	1.46	1.02	0.89	0.25	0.75	0.53	1.38	1.95	1.39	0.86	1.7	1.6	1.39	1.5	1.08	0.44	1.2	0.97	1.5	2.32	1.54	1	0.91	0.78	1.01	1.73	-0.07	1	1	0.58	1.16	1.36	0.93	1	1	1.74	1.02	1.42	0.77	1	1	1.24	1.04	2.28	0.99	1.04	2.12	0.17	1.44
RP0742	0.84	0.63	1.22	-0.33	0.36	0.04	0.72	0.9	1.12	-1.08	-0.51	-0.95	0.68	0.95	1.23	-1.04	-0.41	-0.96	-0.36	-1.47	-1.88	-0.48	-0.85	-0.45	0.99	-0.63	-1.42	1	-0.26	-1.02	-0.52	-0.33	-0.55	1	-1.13	-1.93	0.4	-0.93	-0.92	1	-0.72	-1.66	-0.02	0.17	0.18	0.38	-0.6	-0.55	-0.68
RP0743	2.2	0.87	1.12	2.13	0.53	1.39	0.79	-0.13	0.62	1.28	0.35	1.2	0.64	0.44	1.01	1.47	0.69	1.25	1.78	0.79	1.06	0.97	0.82	0.97	1	0.94	1	1	0.42	0.47	0.94	1.27	0.95	1	1.18	0.83	1.02	1.87	0.63	1	1.09	0.96	1.03	1.65	1.29	1	1.3	1.03	1
RP0744	1.5	0.21	-0.13	0.76	-0.45	-0.42	-0.12	-0.12	-0.28	-0.79	-0.51	-0.84	0.47	0.01	-0.41	-0.14	-0.26	-0.43	0.33	-1.04	-0.67	-0.54	-0.65	-0.49	-0.93	-0.52	-1	-1	-1.03	0.19	-1.37	-1.2	-1.87	-1.46	-1.04	-0.52	-0.63	-1.16	-0.54	-0.89	-0.57	-0.79	-0.37	0.15	0.97	-0.85	-0.54	0.21	-1.05
RP0745	0.01	0.5	-0.21	1.49	1.05	1.3	0.49	0.67	0.76	0.63	0.99	0.84	0.76	0.51	1.3	1.06	1.11	1.12	1.88	1	1.23	0.76	0.66	0.93	0.98	1.06	1	1	-0.65	0.83	1.03	0.8	0.95	1	0.92	-0.09	1	0.72	1.14	1	0.44	0.25	1.13	1.23	1.45	1.01	1.17	1.17	0.78
RP0746	2.37	2.43	3.07	1.91	3.29	4.01	1.23	1.58	1.48	0.89	1.08	0.97	2.67	2.12	3.01	1.75	1.95	2.03	3.09	0.93	1.47	0.04	0.69	0.66	-0.82	1.8	-1	-1	-1	0.92	0.75	0.61	0.62	0.79	0.32	0.85	0.47	1.26	0.79	0.39	-0.48	0.93	0.27	2.9	1.17	-0.1	1.64	1.03	0.85
RP0747	1.44	0.86	0.64	0.33	0.24	-0.42	1.63	0.65	1.08	1.48	0.63	0.79	2.15	0.15	0.7	1.53	-0.07	0.2	1	0.74	0.61	0.53	0.5	0.67	1	-0.15	1	1	-0.6	-0.62	0.73	0.58	0.82	1	0.32	0.15	0.88	0.4	1.17	1	-0.07	-0.06	1	0.54	1.34	0.99	1.04	0.24	0.7
RP0748	1.72	0.55	0.88	0.18	0.26	0.24	0.72	0.01	0.86	0.41	0.41	0.88	0.7	0.12	0.86	0.21	0.26	0.59	1.15	0.55	0.63	0.95	0.85	0.97	0.92	0.7	1	1	1	-0.77	0.95	1.35	1.07	1	1	0.74	0.92	0.93	1.13	1	1	0.41	0.95	0.85	0.92	0.97	0.99	0.53	0.93
RP0749	1.95	1.56	2.1	1.57	1.98	1.74	1.39	0.5	0.8	1.08	0.83	1.1	1.83	1.16	1.18	1.8	1.42	1.56	2.16	0.93	1.53	1.01	0.78	0.98	1.01	1.97	1	1	-1	0.98	0.8	0.56	0.29	1	0.19	1.18	0.84	1.15	1.17	1	0.02	1.34	1.03	2.8	1.44	0.95	1.9	1.25	0.76
RP0750	2.21	1	1.17	0.87	1.03	0.88	1.37	0.91	1.07	1.33	0.76	1.04	1.57	0.99	1.2	1.16	0.85	0.98	2.32	0.74	1	0.3	1.01	0.9	1	1.02	1	1	-0.83	1.01	0.95	0.4	0.69	1	0.58	0.49	0.89	0.53	1.15	1	0.21	0.92	0.85	1.26	1.48	1.02	0.84	1.03	1.01
RP0751	0.57	3.21	2.14	0.83	2.96	2.33	0.74	1.51	1.14	0.94	1.44	1.28	0.33	2.23	1.51	0.95	2.28	1.61	1.83	0.96	1.18	0.12	0.88	0.76	0.99	1.09	1	1	-0.94	1.04	0.94	0.4	0.91	1	0.47	0.73	0.92	1.15	1.37	1	0.06	1.06	0.76	2.04	1.56	1.03	-0.09	0.89	1
RP0752	2.62	-0.19	0.19	1.47	0.16	1.14	1.25	0.84	1.1	1.2	0.78	1.24	1.32	0.43	0.89	1	0.75	1.03	1.93	0.58	0.84	1	1.44	1.25	1	1.33	1	1	0.55	1.03	1.03	0.7	-0.4	1	1.19	-0.5	0.98	0.67	0.12	1	1.04	0.84	1.08	2	1.32	1.01	1.23	1.2	1.07
RP0753	2.27	1.34	2.23	1.96	1.88	2.02	0.28	0.63	1	0.41	0.7	0.83	1.16	0.55	1.83	0.91	1.02	0.97	2.05	1.06	1.04	-0.16	0.74	0.53	0.92	1.37	1	1	-0.97	0.69	0.99	1.02	1.17	1	1.04	0.92	1.01	1.46	1.28	1	0.58	0.8	0.41	2.11	1.31	0.83	1.03	1.01	0.97
RP0754	0.73	0.16	0.87	0.18	-0.25	0.13	0.2	-0.18	0	0.34	0.03	0.23	-0.17	-0.46	0.06	-0.17	-0.42	-0.45	1.22	-0.02	-0.16	0.42	0.7	0.73	1.01	-0.04	1	1	0.03	-0.76	0.97	0.6	0.49	1	0.78	-0.5	0.99	-0.23	0.83	1	0.57	-0.52	0.88	0.77	1.3	1.01	1.1	0.57	0.85
RP0755	1.62	0.84	0.06	0.54	-0.07	0.61	1.35	0.89	0.54	0.39	0.45	0.63	1.61	1.42	0.93	0.77	0.48	0.68	0.01	-0.59	-0.45	-0.15	0.07	0	1	-0.63	-1.29	1	-0.8	-1.12	-0.38	-0.69	-0.84	1	-1.23	-0.92	0.61	-0.48	-0.89	1	-0.69	-0.85	0.31	0.2	1.6	0.61	-0.46	-0.95	0.07
RP0756	1.9	1.52	1.92	0.67	1.72	1.43	-0.67	1.28	0.14	-0.68	0.18	-0.44	0.47	1.73	0.75	-0.03	0.52	-0.43	0.2	-0.42	0.05	-0.22	0.11	0.23	-0.85	-0.25	-1	-1	-0.8	-0.79	0.41	0.6	-0.32	0.38	0.27	-0.61	0.14	0.47	-0.06	-0.16	-0.34	-0.32	0.16	0.24	1.29	-0.13	0.98	-0.35	0.22
RP0757	1.98	1.51	1.79	2.05	2.22	2.5	0.01	0.93	0.83	-0.04	0.97	0.49	0.51	1.04	1.23	0.54	1.47	1.14	1.22	0.29	-0.11	0.29	0.59	0.39	-0.93	0.79	-1	-1	-0.17	1	0.56	0.57	-0.02	0.06	0.71	0.6	0.17	0.5	0.57	-0.32	0.46	0.69	-0.1	1.38	1.14	-0.2	1.01	1.04	0.5
RP0758	0.9	2.93	2.91	-0.48	2.21	1.95	0.23	1.27	1.13	0.52	0.94	1.05	0.28	2.32	2.36	0.18	1.23	0.91	-0.03	0.36	0.15	0.16	0.63	0.54	-0.95	-0.3	-1	-1	0.27	-0.03	0.82	0.83	0.24	0.29	1.17	0.39	0.38	0.43	0.26	-0.07	0.94	0.63	-0.26	0.32	1.12	-0.52	1.09	0.7	0.62
RP0759	0.41	0.54	-0.46	0.36	-0.43	-0.12	-0.96	-0.07	-0.35	-0.3	-0.4	-0.1	-0.83	0.27	0.11	-0.33	-0.26	0.05	0.29	-0.43	-0.19	0.02	0.68	0.48	-0.94	-2.46	-1	-0.96	-1	-0.69	0.49	-0.64	-0.08	0.31	-0.5	0.29	0.17	-1.7	0.17	0.17	-0.68	0.3	-0.52	1.21	0.84	-0.35	1.45	0.13	0.68
RP0760	1.4	1.1	1.25	1.06	0.67	0.88	1.02	0.38	0.79	0.5	0.28	0.5	1.06	0.69	0.81	0.28	0.41	0.53	0.59	0.12	0.56	0.19	0.29	0.36	-0.89	0.23	-1	-0.96	-0.73	0.26	0.19	-0.48	-0.35	-0.48	0.16	0.3	-0.2	-0.77	-0.84	-0.53	-0.25	0.67	-0.25	0.55	0.88	-0.07	-0.08	0.59	0.24
RP0761	2.47	2.64	2.71	1.71	2.23	1.95	1.94	1.66	1.7	1.81	1.83	1.98	2.21	2.15	2.02	1.57	1.99	1.85	2.14	1.6	1.38	0.96	1.01	0.92	1	1.04	1	1	-0.23	1.03	0.96	1.03	1.11	1	0.68	1.5	1.02	1.81	1.6	1	0.67	1.33	1	2.06	1.29	0.99	0.56	1.2	1.17
RP0762	1.26	0.95	0.75	0.66	0.84	0.81	1.42	1.38	1.42	1.47	1.46	1.74	1.29	1.04	1.1	1.15	1.11	1.19	1.59	1.64	1.3	0.94	1.4	1.18	1.03	0.45	1	1	1	-0.92	1.17	0.99	1	1	1	0.34	1.02	-0.13	0.87	1	1	-0.04	0.94	1.34	1.08	0.97	1.91	0.75	1.17
RP0763	1.47	1.13	0.73	0.47	-0.08	0.16	0.78	1.06	0.9	0.54	0.62	0.49	1.32	1.19	1.25	0.76	0.63	0.69	0.43	-0.09	-0.1	-0.88	-0.02	-0.65	-1.28	0.16	-1	-1	-1.03	0.67	0.23	0.16	-0.14	0.07	0.01	0.1	-0.46	0.36	-0.28	-0.74	-0.7	0.41	-0.6	0.3	1.23	-0.89	1.88	-0.8	0.07
RP0764	0.77	1.51	0.56	-0.81	1.5	-0.12	0.6	1.26	0.85	0.63	0.93	0.82	0.22	1.11	0.33	0.28	0.88	0.26	1.8	0.98	0.82	0.88	0.74	0.85	1.01	0.56	1	1	0.37	-0.23	0.85	1.16	1.14	1	0.73	0.81	1.04	0.86	0.94	1	0.98	0.42	0.91	0.56	1.33	0.88	1.39	0.73	1.01
RP0765	0.93	1.94	0.56	0.58	1.14	0.54	1.4	1.8	1.64	1.49	1.36	1.4	0.84	1.71	1.24	0.79	1.12	0.86	1.89	1.53	1.1	1.01	1.06	1.02	0.94	1.27	1	1	-0.24	1.05	1.03	0.9	0.87	1	0.97	0.86	0.94	0.09	0.21	1	0.92	0.31	0.85	1.56	1.45	0.92	1.44	1.2	1.03
RP0766	0.5	1.52	1.38	0.81	1.54	1	-0.16	0.42	0.11	0.31	0.39	0.23	-0.28	1.03	0.52	0.1	0.49	0.04	-0.19	0.06	0.08	0	0.08	-0.06	-0.85	-0.73	-1	-1	-0.7	-0.27	0.52	0.41	0.16	0.48	0.1	0.01	0.5	-0.03	0.27	0.25	0.32	0.06	-0.18	-0.08	1.05	-0.72	1.08	0.19	0.51
RP0767	1.76	1.17	0.19	1.35	0.89	0.91	0.84	0.56	0.51	0.71	0.61	0.68	1.03	0.74	0.46	0.65	0.6	0.56	1.05	0.93	0.69	1.02	0.75	0.91	0.96	-0.02	1	1	-0.64	-0.33	0.75	0.43	1.06	1	0.13	0.66	0.93	-0.19	0.82	1	0.62	0	0.96	0.71	1.41	0.97	1.22	0.7	0.85
RP0768	1.47	3.05	2.08	0.87	1.87	0.86	1.06	1.61	1.07	1.17	1.52	1.26	1.06	2	0.97	1.12	1.52	0.78	2.03	1.62	1.26	0.93	0.89	0.91	1.01	1.02	1	1	-0.59	0.93	0.95	1.14	1.2	1	0.91	1.35	1.03	1.83	1.24	1	0.73	1.02	1.03	1.89	1.64	0.95	1.05	1.24	1.09
RP0769	1.35	0.78	1.97	0.08	0.23	1.08	2.34	1.5	1.81	1.19	0.93	0.95	2.65	1.54	2.02	0.76	1.13	0.66	0.97	1.14	1.51	1.03	0.77	0.97	-0.87	0.22	-1	-0.99	-0.9	0.98	0.61	0.46	0.18	0.24	0.5	1.38	0.27	0.72	0.1	0.11	0.19	1.36	0.63	0.39	1.36	0.06	1.03	1.27	0.7
RP0770	1.37	1.94	0.66	0.62	0.17	0.16	-0.5	0.58	0.4	-0.04	0.03	0.36	-0.31	0.66	0.2	0.07	0.1	0.2	1.67	-0.09	0.1	0.04	-0.07	0.22	0.98	0.93	1	1	0.23	0.18	0.28	0.87	-0.05	1	-0.72	0.17	0.94	0.63	-0.2	1	0.06	-0.14	0.61	1.35	1.25	0.83	1.08	0.97	0.33
RP0771	1.71	1.22	1.09	0.91	0.04	0.66	1.52	0.47	0.75	1.73	-0.48	0.7	1.19	0.17	0.72	0.85	-0.44	0.4	0.65	-0.02	-0.08	0.58	-0.14	0.57	0.88	0.32	-0.86	1	-1.24	-1.38	0.2	1.08	0.68	1	0.05	-0.7	0.82	0.89	-0.03	1	-0.29	-1.11	0.29	0.32	-0.42	0.45	0.02	-0.45	0.18
RP0772	0.81	2.23	0.71	-0.03	1.77	0.96	1.4	2.24	1.57	1.01	1.09	0.86	1.43	3	2.22	0.39	1.87	1.06	-0.03	-0.07	0.01	1.03	0.91	1.01	-0.92	-1.5	-1	-0.99	-0.87	-0.49	0.61	0.03	-0.21	0.1	0.5	0.3	0.25	-0.46	-0.05	-0.03	0.36	0.48	0.56	-0.11	1.42	0.16	1.13	0.73	0.72
RP0773	1.56	2.17	0.7	1.45	1.52	0.8	0.91	0.61	0.3	0.19	-0.13	-0.01	1.3	2.1	1.28	1.39	0.98	1.33	1.62	-0.47	0.62	-0.58	-0.35	-0.74	-1.04	0.5	-1	-1	-1	0.65	-0.14	0.21	-0.55	-0.13	-0.45	-0.07	-0.81	0.49	-0.54	-0.96	-1.09	0.52	0.18	1.46	1.19	-0.43	1.17	0.92	-0.18
RP0774	1.36	0.88	-0.06	0.16	0.54	-0.18	-0.92	-0.99	-0.27	-0.58	-0.1	-0.28	-0.65	-0.89	-0.84	-0.51	0.05	-0.41	1.77	0.62	0.86	0.89	0.14	0.73	1	-0.19	0.98	1	-0.71	-0.92	0.5	0.64	1.22	1	0.22	-0.32	0.96	0.14	1.01	1	0.15	-0.63	0.95	0.68	1.31	0.89	1.89	0.4	0.47
RP0775	1.87	2.66	1.35	1.2	1.92	1.45	0.56	0.6	0.58	0.64	0.53	0.62	1.56	1.4	0.96	0.93	0.79	0.77	1.26	0.61	1.07	0.29	0.62	0.67	-0.93	0.41	-1	-1	-0.96	1	0.5	0.4	0.33	0.48	-0.13	0.77	0.4	0.69	0.37	0.25	-0.12	0.95	-0.34	1.27	0.95	-0.73	0.19	1.04	0.78
RP0776	2.5	1.88	2.19	1.77	0.82	1.35	1.51	1.2	1.24	1.89	1.17	1.4	1.87	1.55	1.42	2.01	1.19	1.47	1.81	0.99	1.2	0.18	0.14	0.18	0.91	1.13	1	1	-0.43	0.56	0.79	0.77	1.12	1	0.56	0.17	0.96	0.95	1.2	1	0.07	0.29	0.71	1.4	1.37	0.82	1.1	1.05	0.5
RP0777	2.03	1.78	1.21	1.88	1.84	2.07	1.53	1.36	1.54	0.76	0.94	0.73	2.43	2.34	2.39	1.81	1.92	1.98	0.14	-0.24	0.62	-0.17	-0.16	-0.15	-0.95	0.29	-1	-1	-0.99	0.53	-0.18	0.17	0.07	0.34	-0.9	-0.16	0.07	0.52	0.7	0.13	-0.74	0.26	-0.15	0.42	1.29	-0.58	1.42	0.74	0.13
RP0778	1.38	2.46	2.42	-0.19	1.43	0.58	0.74	1.22	1.35	0.23	0.56	0.53	0.59	1.62	1.54	-0.2	0.65	0.37	0.96	0.16	-0.2	0.72	0.21	0.58	0.96	-0.57	1	1	-0.97	-0.81	0.37	-0.22	0.72	1	-0.47	-0.26	0.77	-0.76	0.35	1	0.09	-0.75	1.15	0.12	1.42	1.03	1.2	0.01	0.26
RP0779	0.19	1.06	0.84	0.55	0.36	0.01	0.05	-0.48	-0.74	-0.47	-0.75	-0.91	0.7	0.22	0	0.28	-0.62	-0.56	0.16	-1.01	-1	-0.96	-1.06	-0.7	-0.75	-1.14	-1	-1	-1.01	-1.04	-0.9	-1.17	-1.53	-1.05	-0.8	-1.57	-0.4	-1.28	-1.36	-0.67	-0.4	-1.38	-0.37	-0.25	0.92	-0.78	-0.26	-1.33	-1.29
RP0780	1.09	-0.42	0.68	1.17	-0.89	0.63	0.77	-0.12	0.66	1.02	0.22	0.87	0.71	0.13	0.82	1.05	-0.03	0.56	1.45	0.09	-0.15	1.01	0.67	0.94	0.94	-0.36	1	1	-0.81	-0.87	0.96	0.67	0.06	1	0.74	-0.24	1.03	-0.11	-0.5	1	0.98	-0.59	1.04	0.34	1.45	0.92	1.18	0.52	0.83
RP0781	0.66	1.23	-0.05	0.06	0.92	0.55	0.45	1.54	0.85	-0.06	0.94	0.59	0.42	1.08	0.69	-0.32	0.75	0.33	1.21	0.28	0.08	1.03	0.58	0.84	1	0.48	1	1	0.56	-0.64	0.61	0.94	0.74	1	-0.31	0.46	0.99	0.25	0.61	1	0.42	-0.17	1.12	1.01	1.41	0.98	1.43	0.64	0.8
RP0782	2.67	1.24	-0.05	1.99	0.78	0.9	0.45	1.03	-0.12	1.34	1.22	1.36	1.1	1.08	-0.01	1.45	1.05	1	1.41	0.78	0.45	0.18	0.54	0.46	0.93	0.08	1	1	-0.5	-0.32	0.55	0.2	0.53	1	-0.45	0.85	0.76	-0.23	0.27	1	0.38	0.21	0.49	0.18	1.27	0.84	1.07	0.56	0.64
RP0783	1.28	1.51	1.21	1.27	1.38	1.46	0.98	1.02	1.23	1.58	1.14	1.58	0.73	1.07	1	1.23	1.23	1.38	1.87	1.04	1.1	0.49	-0.51	-0.01	-1.47	1	-0.76	-0.93	1	-1	-3.05	0.32	-0.25	0.44	1	-1	-2.2	2.02	-0.11	-1.18	1	-1	-1.49	2.24	1.29	-0.08	0.9	0.13	-2.2
RP0784	1.83	0.96	1.26	1.5	0.99	0.99	1.32	0.77	0.79	1.36	1	1.1	1.9	0.4	0.8	1.53	0.65	0.65	1.6	1	0.53	1.03	1.04	1.05	0.99	0.78	1	1	1.07	-0.32	1.06	0.93	0.67	1	1.14	0.39	0.93	-0.09	0.16	1	1.01	0.06	0.96	1.34	1.55	1.01	1.47	0.72	1
RP0785	1.55	2.64	2.76	1.62	2.2	2.06	0.91	1.19	1.55	1.45	0.95	1.15	1.37	1.62	1.91	1.91	1.08	1.4	1.43	0.89	1.16	0.49	0.47	0.6	0.94	0.25	1	1	-0.93	-0.25	0.76	0.61	1.18	1	0.47	0.16	0.94	0.44	1.33	1	0.2	0.11	0.94	0.82	1.28	0.86	1.25	0.49	0.71
RP0786	2.16	2.05	2.01	2.56	1.67	2.14	2.41	1.88	2.08	2.43	1.76	2.3	2.44	2.06	2.04	2.71	1.79	2.15	1.96	1.72	1.43	0.99	1.21	0.97	0.99	1.27	1	1	0.42	1.05	1.02	1.27	1.12	1	1.18	1.43	1.04	2.02	1.13	1	1.14	1.45	0.96	1.96	1.27	1.03	1.27	1.13	1.31
RP0787	1.91	1.81	0.69	0.35	1.25	0.59	1.34	1.55	1.26	1.5	1.15	1.37	1.36	1.32	0.78	1.05	0.57	0.57	1.19	1.12	0.43	1.03	0.6	0.85	1	0.33	-0.88	1	-0.83	-0.75	1.08	0.85	0.04	1	0.85	-0.59	1	-0.11	-0.65	1	0.8	-0.8	1.17	1.1	1.16	0.99	1.91	0.24	0.9
RP0788	1.95	2.24	2.03	1.12	1.44	1.81	1.93	1.95	2.07	1.62	1.13	1.54	1.1	2.2	2.08	0.92	1.49	1.71	1.67	0.97	1.18	0.76	0.42	0.78	0.99	0.13	1	1	-0.93	-0.13	0.54	0.21	1.13	1	-0.15	0.31	0.65	0.23	1.26	1	-0.58	0.24	0.68	0.84	1.34	0.7	0.68	0.66	0.65
RP0789	1.15	0.54	0.33	0.98	0.61	0.79	1.09	0.1	0.4	0.84	-0.14	0.02	1.16	-0.34	0.22	0.78	-0.51	-0.15	1.29	0.2	0.06	-0.49	-0.59	-1.23	-1.23	0.77	-1	-1.07	-1.12	0.08	-0.07	0.1	0.06	-0.15	0.19	-0.16	-1.3	-0.32	-0.16	-0.94	-1.34	0.1	-0.52	1.66	1.38	0.12	2.27	1.43	-0.7
RP0790	2.03	2.95	2.32	1.91	1.74	1.79	0.73	1.29	1.16	0.42	0.59	0.61	1.2	2.31	2.03	1.16	0.98	0.87	1.19	0.23	0.13	0.47	0.52	0.6	-0.81	-0.35	-1	-0.96	-1	-0.1	0.54	0.16	0.1	0.18	0.41	0.28	-0.07	-0.54	-0.12	-0.3	-0.36	0.39	0.58	0.61	1.33	0.78	1.11	0.53	0.55
RP0791	2.19	0.95	1.25	0.81	0.25	0.5	1.36	-0.01	0.73	0.81	-0.19	0.47	1.76	0.35	1.14	1.27	0.1	0.55	1.82	-0.42	-0.28	1	0.96	0.95	0.87	1	1	1	-0.57	1	0.67	0.51	-0.93	1	0.2	0.12	0.59	-0.42	-1.15	1	0.82	-0.12	0.67	1.56	1.46	0.91	1.18	1.13	0.66
RP0792	0.56	1.24	0.28	0.67	1.57	0.84	-0.38	0.74	0.35	-0.49	0.49	-0.04	-0.57	0.63	0.18	-0.53	0.37	-0.22	0.61	-0.95	-1.1	-0.22	0.1	0.16	-0.91	-0.69	-1.01	-1	-0.42	-1.04	0.01	-0.06	-1.09	-0.2	-0.26	-0.73	0.16	-0.67	-0.4	-0.15	0.33	-0.92	-0.52	0.07	1.1	-0.52	-0.47	-1.07	-0.01
RP0793	2.4	0.45	1.56	1.38	-0.12	1.11	1.34	-0.85	0.36	1.19	-0.48	0.52	2.3	-0.56	1.03	1.59	-0.57	0.46	1.77	0.55	0.38	0.89	0.74	0.8	1	0.69	1	1	-1	-0.39	0.62	-0.48	0.44	1	-0.6	0.53	0.78	-0.75	0.67	1	0.36	-0.04	0.92	2.25	1.33	0.89	1.72	0.93	0.75
RP0794	0.31	0.89	-0.24	2.26	1.73	2.15	0.87	1.69	1.41	0.78	1.53	1.43	1.35	1.54	1.12	1.14	1.5	1.18	1.89	1.73	1.29	0.98	1.35	1.19	1	1	1	1	-0.46	1.05	1.16	1.06	1.2	1	1.1	1.2	1.03	1.54	1.12	1	1.21	1.3	1.02	2.06	1.3	1	0.94	1.14	1.24
RP0795	2.4	1.53	1.9	2.05	1.39	1.85	2.24	2.37	2.66	1.95	2	2.13	1.75	2.02	2.26	1.4	1.58	1.57	1.94	2.02	1.38	0.97	1.14	0.91	0.99	1.2	1	1	0.23	1.05	1.12	1.04	1.1	1	1.16	1.41	1.01	0.45	0.55	1	1.16	0.82	0.93	1.98	1.29	0.99	0.87	1.08	1.33
RP0796	1.49	-0.04	0.01	1.55	0.58	0.2	2.58	0.86	1.45	1.8	0.91	1.14	3.48	0.74	1.42	1.93	0.67	1.09	0.96	1.04	1.28	-0.41	0.11	-0.25	-1.04	0.65	-1	-1	-1.07	0.67	0.55	0.71	0.21	0.4	0.61	0.45	-0.1	0.91	0.24	-0.25	-0.46	0.75	0.16	1.01	1.47	-0.15	1.54	1.24	0.35
RP0797	2.69	2.52	2.83	2.05	1.91	1.4	0.67	0.9	0.85	1.08	1.11	1.13	1.16	1.37	0.9	0.94	1.17	1.01	1.77	0.92	0.93	-0.14	0.28	0.18	0.98	1.04	1	1	-0.7	0.82	0.89	0.79	0.61	1	0.59	0.41	0.92	1.02	0.95	1	0.04	0.7	0.54	1.42	1.26	0.72	1.05	0.95	0.83
RP0798	1.66	3.26	2.9	2.78	3.41	3.37	1.46	2.35	2.14	1.29	1.73	1.69	1.23	2.4	2.18	1.05	1.49	1.29	1.88	1.59	1.03	0.99	1.34	1.21	0.95	-0.14	1.02	1	-0.45	-0.31	1.14	0.76	1.08	1	1.03	0.38	1.04	0.15	1.12	1	1.07	0.32	0.94	0.92	1.49	1	1.33	0.7	1.17
RP0799	0.31	0.47	-0.82	0.03	0.49	0.21	1.19	0.64	0.95	1.02	0.73	0.97	-0.42	0.02	-0.47	-0.4	0.2	0.25	1.22	0.76	0.42	0.89	0.29	0.51	-0.93	0.72	-1	-1	-0.02	1.02	0.44	0.65	-0.72	-0.25	0.78	0.85	-0.03	0.63	-0.72	-0.54	0.54	1.15	-0.02	1.1	1.16	-0.31	1.36	1.2	0.54
RP0800	0.68	3.08	0.98	0.22	1	0.68	0.64	1.99	0.72	0.29	0.82	0.57	0.97	2.71	0.94	0.76	1.21	0.92	1.52	0.56	1.05	0.85	0.68	0.81	0.97	-0.06	1	1	-1.01	-0.42	0.6	-0.12	0.54	1	-0.29	0.29	0.59	-0.24	0.91	1	-0.6	0.37	0.84	0.96	1.45	0.84	1.3	0.6	0.71
RP0801	1.23	1.9	1.32	0.96	1.05	1.28	1.28	2.1	1.9	0.71	1.48	1.26	1.7	3.47	2.71	1.68	2.32	1.76	0.86	0.24	0.97	-0.3	-0.12	-0.02	-1.14	-0.27	-1.01	-1	-0.99	-0.27	-0.9	-0.12	-0.26	0	-1.25	0	-0.28	0.15	0.28	-0.3	-1	0.11	-0.74	0.6	0.93	-0.86	0.3	-0.18	-0.09
RP0802	1.1	2.18	0.81	1.51	1.12	0.96	1.86	1.54	1.07	1.88	0.89	1.19	1.77	1.91	0.94	2.09	1.19	1.39	1.14	0.92	1.27	0.62	0.55	0.7	0.97	-0.47	1	1	-1	-0.69	0.3	-0.19	0.48	1	-0.63	0.63	0.59	-0.04	1.13	1	-0.43	0.52	0.39	0	1.42	0.52	1.25	0.62	0.44
RP0803	1.75	0.48	2.12	1.1	0.89	2.25	1.64	1.34	1.8	1.48	1.29	1.68	1.72	1.19	1.73	1.18	1.02	1.26	1.86	1.41	0.98	0.94	0.95	0.89	1.01	1.21	1	1	-0.95	0.97	0.95	0.48	0.84	1	0.39	1.38	0.99	0.03	0.34	1	1.1	0.56	1.03	2.04	1.65	0.96	1.11	1.24	1.04
RP0804	1.86	1	0.72	0.22	0.41	0.25	0.79	0.07	0.16	0.19	-0.24	-0.06	1.11	0.29	0.81	0.68	-0.13	0.17	1.12	-0.33	0.32	-0.12	-0.15	-0.01	-0.99	-0.72	-1	-1	-0.99	-0.35	-0.12	-0.27	0.1	0.18	-0.41	-0.71	-0.5	-0.59	-0.19	-0.58	-0.94	-0.43	0.54	0.57	1.42	-0.14	1.53	0.43	-0.18
RP0805	1.99	2.4	2.06	2.01	1.75	2	1.24	1.18	1.3	1.4	1.28	1.7	1.53	1.48	1.51	1.58	1.36	1.67	1.95	1.55	1.41	1.03	1.23	1.16	1.01	1.23	1	1	1	0.07	1.16	0.93	1	1	1	0.09	1.01	-0.28	0.88	1	1	-0.24	1.03	1.71	1.05	1.01	1.93	0.84	1.07
RP0806	2.25	2.07	2.37	1.67	2.26	2.13	2.76	2.13	2.3	2.62	2.28	2.48	2.88	2.24	2.28	2.18	2.15	2.1	2.04	2.58	1.98	0.9	1.07	0.82	0.96	1.58	1	1	1.08	1.05	1.12	1.33	1.18	1	1.22	2.39	0.99	1.26	0.72	1	1.09	1.68	0.81	1.85	1.38	0.9	1.58	1.13	1.32
RP0807	1.37	0.53	0.02	0.57	0.22	0.5	0.11	-0.07	-0.03	-0.2	0.11	0.04	0.27	-0.2	-0.11	-0.22	0.01	-0.22	0.9	-0.09	-0.07	1.03	1.2	0.98	-1	-2.53	-1	-0.96	-1	-0.75	0.65	-0.9	-0.62	-0.32	0.81	-0.1	0.41	-1.5	-1.04	0.28	1.27	-0.39	-0.04	1.12	1.3	0.9	1.78	0.58	0.77
RP0808	2	2.17	1.83	0.97	2.23	2.34	1.69	1.88	1.85	1.02	2.2	1.74	1.67	1.95	1.77	1	2.29	1.73	1.24	0.63	0.44	-0.17	-0.1	0.08	1	-0.09	1	1	-0.66	-0.49	-0.21	0.27	0.32	1	-1.14	0.37	0.77	0.13	0.21	1	-0.39	-0.1	0.35	0.14	1.06	0.67	-0.53	-0.03	0.17
RP0809	0.68	0.7	0.27	0.82	0.04	0.47	0.19	0.96	0.42	1.02	0.59	1.19	0.38	1.03	0.31	1.06	0.45	0.93	0.95	0.74	0.52	1.03	1.23	1.4	0.89	0.83	-0.4	1	1	-0.91	1.17	1.13	0.48	1	1	-0.14	1.01	0.29	0.11	1	1	-0.34	0.9	1.44	0.03	0.96	0.99	-0.26	0.96
RP0810	1.69	2.5	2.06	0.28	2.72	1.86	1.48	2.1	2.07	0.99	1.66	1.36	1.81	2.59	3.08	0.87	1.93	1.61	1.14	1.1	0.87	0.52	1.03	1	-0.92	0.41	-1	-1	-0.7	0.92	0.88	0.73	0.59	0.46	1.03	0.95	0.43	1.03	0.76	0.03	0.83	0.95	0.23	1.15	1.25	-0.21	0.94	1.47	0.88
RP0811	1.11	0.78	1.56	-1.06	0.46	0.31	0.01	0.61	0.83	-0.43	0.09	-0.1	-0.61	0.91	0.93	-0.84	0.2	-0.31	-0.35	-0.84	-0.79	-1.61	-1.1	-1.38	-0.87	-0.58	-1	-1	-1.02	-1.13	-1.34	-0.34	-1.32	-0.89	-1.25	-0.7	-0.72	-0.2	-1.19	-1.05	-0.97	-0.83	-1.54	-0.09	0.8	-1.14	-1.41	0.18	-0.83
RP0812	1.33	2.39	1.08	0.19	0.89	0.64	1.08	0.56	0.5	0.56	0.15	0.18	1.18	1.01	0.57	0.51	0.38	0.24	1.22	-0.21	0.14	0.19	0.58	0.73	-0.8	0.85	-1	-0.96	-0.99	0.87	0.3	-0.71	-0.77	-0.46	0.33	-0.43	-0.23	-1.54	-1	-0.53	0.04	0.2	0.7	1.6	1.39	0.66	1.09	1.05	0.2
RP0813	2.82	0.78	1.31	0.07	1.1	0.51	2.34	1.02	1.57	1.84	1.19	1.52	2.59	1.16	1.63	1.51	1.28	1.05	1.86	1.29	1.41	0.96	1.29	1.14	0.99	1.11	1	1	-0.89	1.05	1.04	0.4	0.4	1	0.8	0.89	0.98	0.81	0.71	1	0.96	1.37	0.98	2.07	1.28	0.98	0.97	1.09	1.14
RP0814	2.97	1.5	1.17	1.46	1.67	1.22	1.86	1.39	1.73	1.07	1.37	1.38	2.34	1.51	1.78	1.38	1.72	1.68	2.09	1.16	1.45	0.19	0.72	0.67	0.98	1.01	1.02	1	-0.52	1.04	0.89	0.46	0.99	1	0.55	0.44	0.96	0.73	1.19	1	0.39	0.73	0.73	1.92	1.34	1.02	0.97	0.93	0.84
RP0815	1.45	1.67	0.83	-0.35	-0.19	0.22	1.92	1.86	1.41	0.91	0.38	0.46	0.87	1.94	0.88	0.01	-0.25	-0.65	-0.89	0.06	-1	-1.8	-1.25	-1.57	-1.05	-1.46	-1	-1	-1.03	-0.79	-0.31	-0.55	-0.62	-0.33	-0.36	-1.19	-0.7	-1.05	-0.26	-0.92	-0.86	-1	0.94	-0.75	0.79	-1.57	-1.64	-0.95	-0.59
RP0816	2.06	2.23	2.25	2.42	1.74	1.92	1.49	2.28	1.88	1.89	2.62	2.58	1.98	2.46	2.31	2.51	2.45	2.59	1.65	1.52	1.17	0.94	1.36	1.18	1.04	0.19	1	1	1	-1.01	1.16	0.86	1	1	1	-0.15	1.02	-0.39	0.87	1	1	-0.5	0.93	1.32	1.08	0.97	1.91	0.67	1.14
RP0817	1.35	0.8	0.95	0.34	0.55	0.86	-1.02	-0.12	-0.52	-0.22	1.08	0.74	-1.33	-0.35	-0.98	-0.91	0.08	-0.1	0.25	0.02	-1.2	0.95	0.63	0.68	0.95	-0.73	-1.49	1	-0.09	-1	0.03	-0.36	0.05	1	-1	-0.36	0.78	-0.66	-0.49	1	-0.41	-0.92	0.78	0.86	1.6	0.96	0.54	-0.13	0.77
RP0818	2.17	2.72	1.76	1.19	2.32	1.05	-0.72	1.31	0.56	0.36	1.18	0.52	-0.83	1.32	0.06	-0.04	1.08	0.3	2.5	1.3	1.19	1.03	0.79	1.03	1	0.72	1	1	-0.15	0.19	1.01	0.91	1.11	1	0.88	0.53	1.03	0.27	0.69	1	0.78	0.17	1.11	1.38	1.53	1.01	1.73	0.96	0.89
RP0819	2.25	1.29	0.62	0.15	0.72	0.04	2.78	1.18	2.06	2.02	1.42	1.45	2.68	1.38	1.48	1.65	1.67	1.18	1.49	1.89	1.61	0.87	0.36	0.59	1	-0.46	-0.05	1	-0.66	-0.91	-0.37	0.22	1.13	1	-1.21	0.65	0.7	0.44	0.95	1	-0.54	0.37	0.78	0.01	1.03	0.87	0	-0.05	0.57
RP0820	2.41	2.58	2.85	2.18	1.5	2.23	3.48	1.67	2.7	2.32	1.26	2.03	3.13	2.31	3.2	2.82	1.55	2.47	1.8	0.81	0.93	1	1.17	1.01	1.01	0.91	1	1	1	-0.45	1.03	1.37	0.55	1	1	0.92	0.95	1.44	1	1	1	1.13	1.05	1.8	1.03	1.04	1	0.63	1.21
RP0821	0.83	0.03	0.09	0.24	-0.53	0.22	0	0	0.15	-0.04	-0.68	-0.09	0.23	-0.24	0.13	0.18	-0.68	-0.24	0.36	-1.18	-1.13	0.98	0.77	0.72	-0.01	-0.84	-1	1	0.1	-1	-0.25	-1.11	-1	1	-1	-1	-0.37	-1.03	-1	1	-0.29	-1	-0.1	0.69	1.99	1	0.61	0.24	-0.01
RP0822	2.03	2.87	3.02	2.08	2.91	3.01	1.53	1.27	1.51	1.28	1.16	1.36	1.21	1.62	2.32	0.65	1.38	1.3	1.86	0.67	0.11	0.3	0.17	0.64	-1	0.07	1	-0.73	-1.01	0.08	0.88	0.44	-0.24	0.88	0.88	-1.05	0.49	-0.24	0.78	0.62	0.33	-0.52	0.59	1.18	1.41	0.48	1.28	0.5	0.57
RP0823	2.74	0.59	0.08	0.69	0.95	0.67	1.5	1.16	1.31	1.49	1.32	1.52	1.07	1.11	0.62	1.34	1.15	1.4	2.4	1.48	1.43	0.55	0.87	0.95	0.95	1.01	1	1	-0.9	0.77	0.99	0.88	1.04	1	0.85	0.98	0.95	1.81	1.35	1	0.03	0.94	1.04	1.47	1.39	0.91	1.18	1.15	0.97
RP0824	0.96	1.41	0.18	0.72	2.16	1.33	1.78	1.55	1.7	1.81	1.78	1.83	1.12	1.82	1.43	2.07	2.13	2.12	1.81	1.62	1.72	1.03	0.88	0.99	0.98	1.04	1	1	-0.5	1.05	1.01	0.96	0.99	1	0.94	1.12	0.99	1.51	1.1	1	0.72	1.42	0.96	1.06	1.41	0.98	1.17	1.22	0.97
RP0825	2.32	2.16	2.21	2.27	2.75	2.95	0.57	1.06	0.67	0.43	0.74	0.44	1.56	1.2	1.04	0.84	1.49	1.1	2.73	0.33	1	0.08	0.45	0.31	-0.83	0.71	-1	-1	-1	0.84	0.55	0.15	0.17	0.49	0	0.49	0.25	0.5	1.01	0.05	-0.75	0.64	1.01	2.6	1.22	-0.27	1.66	1.06	0.55
RP0826	1.4	2.02	1.35	0.77	3.4	2.71	1.14	1.18	1.12	0.77	1.55	1.15	1.29	1.45	1.45	0.72	2.31	1.6	2	0.85	1.01	0.27	0.62	0.49	1	1.43	1	1	0.64	0.99	1	1.12	0.51	1	0.89	0.94	1.04	1.68	0.89	1	0.67	0.99	0.84	1.91	1.55	1.01	1.17	1.04	0.82
RP0827	1.04	1.81	-0.09	0.86	1.99	1	1.54	0.76	1.02	1.6	1.3	1.43	1.31	1.32	1	1.62	1.56	1.35	2.02	1.37	1.35	0.3	0.42	0.94	1	0.43	1	1	-0.42	0.19	0.74	0.71	1.01	1	0.23	0.93	0.94	1.27	1.21	1	0.12	0.88	0.77	1.44	1.23	0.99	0.96	0.58	0.77
RP0828	2.12	1.78	1.63	2.46	1.27	1.96	0.94	1.48	1.2	1.2	1.36	1.37	1.27	1.83	1.64	1.49	1.55	1.55	2.64	1.47	1.3	1	1.1	1.08	1	1.04	1	1	-0.23	1.03	1.09	1.27	1.16	1	1.14	1.54	1.02	2.13	1.13	1	1.2	1.28	1.08	1.96	1.31	1.01	1.08	1.87	1.17
RP0829	0.66	0.39	0.71	0.06	-0.59	-0.05	-1.79	-0.91	-0.71	-1.22	-0.79	-0.55	-1.75	-0.93	0.07	-1.32	-0.49	-0.55	-0.24	-0.9	-0.86	-0.6	-1.2	-0.6	0.96	-0.56	-0.79	1	-1.24	-1.28	-0.95	-0.23	0.7	1	-1.23	-2.19	0.48	-0.75	0.01	1	-1.25	-2.3	-0.22	-0.28	-0.91	0.17	-1.28	-1.45	-0.68
RP0830	0.47	2.38	1.54	0.32	2.39	1.41	0.83	1.19	1.37	0.56	0.84	1.05	1.05	2.6	2.28	0.98	2.29	2.1	1.26	-0.37	0.43	-0.35	0.31	-0.1	-0.91	0.81	-1.01	-1	-0.05	0.62	0	0.82	-0.63	0.15	-0.77	0.23	0.03	1.33	-0.51	-0.32	-0.56	0.52	-0.64	1.15	0.99	-0.66	1.09	0.79	0.31
RP0831	0.57	0.56	0.2	0.59	0.05	0.35	1.11	0.14	0.55	1.15	0.26	0.91	0.22	-0.21	-0.44	0.64	0.02	0.24	0.93	0.78	0.78	-0.87	0.39	-0.01	-0.94	0.72	-1	-1	-0.39	0.88	0.62	1.07	0.41	0.36	0.84	0.91	0.32	1.57	-0.12	-0.14	0.37	0.87	-0.85	1.34	0.99	-0.45	0.97	0.81	0.55
RP0832	1.36	0.59	0.59	0.33	0.83	0.45	1.51	0.53	1.09	0.8	0.46	0.81	0.46	0.1	0.39	-0.3	-0.15	-0.24	0.52	0.69	0.06	-0.3	0.14	0.04	-0.87	-0.19	-1	-1	-0.94	-0.17	0.56	0.41	0.27	0.38	0.45	0.09	0.35	-0.11	-0.22	-0.01	0.39	-0.08	-0.44	0.71	0.95	-0.47	-0.42	0.09	0.55
RP0833	1.77	2.52	3.24	1.76	3.15	3.46	1.91	1.44	1.58	1.1	1.36	1.3	1.93	1.85	1.96	1.24	2.17	2.07	1.32	0.67	0.91	-0.93	0.13	-0.44	-0.82	0.67	-1	-1	-1.01	0.91	0.42	0.35	0.49	0.68	-0.24	0.59	0.29	0.94	0.66	0.21	-0.43	0.83	-0.55	1.33	0.89	-0.78	-0.85	1.11	0.4
RP0834	0.97	1.46	1.28	0.73	1.08	0.93	0.92	0.92	0.8	0.51	0.64	0.58	0.5	1.41	1.63	0.62	1.02	0.99	0.67	0.38	0.81	-0.52	0.29	-0.08	-0.97	0.31	-1	-1	-0.98	0.52	0.27	-0.04	-0.06	0.41	-0.3	0.21	-0.5	0.22	-0.58	-0.84	-0.83	0.8	-0.13	0.88	1.29	-0.57	2.02	-0.49	0.37
RP0835	1.74	2.15	1.49	1.21	1.03	1.11	0.93	1.18	0.94	0.98	0.87	0.96	1.56	2.35	1.86	1.53	1.42	1.22	1.64	0.78	0.94	0.03	0.61	0.49	-0.92	-0.2	-1	-0.98	-0.97	0.72	0.64	0.64	0.42	0.48	0.45	0.84	0.11	0.71	0.11	-0.24	-0.33	0.82	0.49	1.79	1.37	0.68	1.44	1.01	0.71
RP0836	1.93	1.56	0.84	0.6	0.94	0.51	1.2	1.36	1.13	1.33	1.16	1.29	1.58	1.6	1.36	1.14	1.1	0.98	1.4	1.15	0.89	0.16	1.06	0.68	0.98	0.16	1	1	0	-0.32	1.09	0.69	0.81	1	1.13	0.28	1.04	0.53	1.24	1	1.07	0.62	0.49	1.08	1.37	0.94	0.78	-0.06	0.95
RP0837	1.21	2.01	2.34	0.7	0.69	0.49	0.89	0.77	0.93	0.55	0.17	0.43	0.64	0.15	1.09	0.25	-0.37	-0.35	1.31	-0.04	0.22	0.13	0.68	0.37	-0.93	0.16	-1	-0.99	-0.99	0.79	0.71	0.27	-0.28	0.29	0.76	-0.2	-0.02	0.04	-0.33	-0.49	0.13	0.48	0.21	1.42	1.42	0.02	1.04	1.07	0.56
RP0838	1.33	-0.35	-0.17	0.12	-0.28	-1.04	0.99	-0.61	-0.28	-0.02	-0.59	-0.55	0.8	-0.17	0.09	-0.22	-0.11	-0.2	0.18	-0.83	-0.21	-1.5	-0.96	-1.63	-0.88	0.21	-1	-1	-1.12	0.44	-0.77	-0.17	-1.1	-1.05	-0.44	-0.22	-1.22	-0.28	-1.17	-1.26	-1.19	0.08	-0.24	0.25	1.22	-1.39	-1.51	0.62	-1.04
RP0839	0.93	0.98	0.11	0.05	1.4	0.49	0.63	1.17	1.25	0.44	1.02	0.59	0.4	1.25	1.13	0.51	0.91	0.51	1.6	1.32	1.01	1.03	0.99	1.09	1.01	0.31	1	1	0.47	-0.66	1.06	0.93	1.04	1	1.08	0.87	1.03	0.6	1.31	1	0.84	0.52	1.08	0.99	1.38	1	1.37	0.62	1.03
RP0840	-0.59	2.37	1.53	0.75	1.69	1.24	-1.44	1.11	-0.07	-0.88	0.06	-0.39	-1.09	1.96	0.83	-0.14	1.17	0.68	0.09	-0.8	-0.15	0.26	0.29	0.54	-0.93	-0.56	-1	-1	-0.49	-0.5	0.01	0.11	-0.87	-0.23	-0.3	-0.19	-0.15	0.07	-0.42	-0.64	-0.44	0.03	0.12	0.27	1.24	-0.19	0.94	0.2	0.06
RP0841	2.76	2.59	2.73	2.25	3.12	3.06	1.56	2.17	1.86	1.59	2.09	1.9	1.52	2.39	1.95	1.62	2.32	2.03	2.08	1.99	1.61	0.99	1.31	1.1	0.99	1.97	1	1	-1	1.05	1.09	0.73	1.11	1	0.92	1.78	1.03	1.31	1.15	1	1.11	1.56	1.01	2.99	2.22	1	1.72	1.14	1.25
RP0842	1.58	1.97	2.23	1.43	2.27	2.89	0.52	1.87	1.43	0.8	1.35	1.18	1.12	2.5	2.26	1.63	2.24	2.01	0.92	0.44	1.11	-0.17	0.39	0.36	-0.8	0.31	-1	-1	-0.97	0.79	0.49	0.53	0.31	0.58	0.1	0.33	0.27	0.75	2.02	0.29	-0.67	0.52	0.29	0.87	1.25	-0.44	0.96	0.99	0.54
RP0843	0.97	-0.02	-1.14	0.63	-0.07	0	2.03	0.22	0.9	1.84	0.46	1.09	1.43	-0.43	-0.19	1.29	-0.25	0.27	1.44	0.59	0.43	-0.07	0.19	0.21	0.93	-0.18	1	1	-0.79	-0.84	0.75	0.39	0.59	1	0.24	-0.16	0.96	0.06	0.63	1	0.12	-0.18	0.41	0.33	1.23	0.6	-0.31	0.07	0.72
RP0844	1.01	0.11	0.07	-0.32	-0.52	-0.11	0.54	0.36	-0.05	-0.94	-0.35	-0.52	0.81	0.42	0.65	-1.03	-0.35	-0.46	0.12	-1.37	-1.54	-0.89	-1.51	-1.11	1	-0.38	-1.21	1	-0.46	-1.06	-0.63	-0.14	-0.93	1	-1.03	-1.88	0.4	-0.81	-1.27	1	-0.87	-1.7	-0.27	0.09	-1.13	0.21	-1.02	-1.29	-1.18
RP0845	1.69	1.33	2.5	0.86	1.65	2.09	-0.12	0.54	0.67	0.46	0.93	0.82	0.98	0.64	1.41	0.61	1.54	1.72	0.61	0.42	0.77	0.09	0.26	0.03	-0.88	-0.33	-1	-1	-0.98	-0.28	0.33	0.39	0.25	0.37	-0.51	0.77	0.22	1.06	0.76	-0.15	-0.16	0.88	-0.14	0.76	0.91	-0.44	0.03	0.29	0.47
RP0846	-1.54	2.07	1.42	0.58	1.25	1.45	-0.48	1.89	1.19	0.08	1.43	0.99	-0.6	2.57	1.77	0.75	1.92	1.59	0.8	0.79	0.97	0.93	0.62	0.88	1.01	0.42	-0.33	1	-0.36	-0.22	0.64	0.99	0.5	1	0.1	0.67	0.94	1.5	0.28	1	0.12	0.68	1.01	1.28	1.33	0.95	1.15	0.16	0.93
RP0847	1.5	1.04	2.23	0.48	0.07	0.47	1.31	0.87	1.08	1.45	0.79	1.09	0.55	0.66	0.95	0.31	0.18	0.22	0.57	0.95	0.7	0.14	0.68	0.6	-0.89	-0.06	-1	-1	-0.77	-0.05	0.75	0.68	0.74	0.64	0.66	0.67	0.51	0.64	0.93	0.2	0.13	0.52	0.05	0.25	1.14	-0.12	0.89	0.82	0.8
RP0848	1.82	2.18	1.67	0.31	0.45	0.1	-0.2	0.05	-0.18	-0.86	-0.57	-0.77	0.66	1.12	0.61	-0.27	-0.06	-0.34	1	-1.07	-0.69	-0.2	-0.04	0.04	-1.09	-0.6	-1	-0.99	-1	0.16	-0.22	-0.77	-0.96	-0.42	-0.57	-0.81	-0.5	-1.31	-0.94	-0.77	-0.29	-0.39	0.16	0.84	1.2	0.25	1.11	0.72	-0.19
RP0849	1.65	1.05	0.93	0.63	0.29	0.76	0.81	1.38	0.77	0.94	0.73	0.71	0.53	1.27	0.5	0.75	0.54	0.09	0.6	0.12	-0.49	0.93	1.43	1.08	0.9	-0.8	1	1	-0.46	-0.93	0.91	-0.1	-0.22	1	0.62	-0.29	0.75	-0.86	-0.4	1	1.06	-0.27	0.71	-0.6	1.27	0.95	0.59	0.55	1.07
RP0850	2.33	1.01	1.36	1.69	0.42	1.07	2.13	0.97	1.85	1.03	0.26	1.18	2.28	0.56	1.54	1.19	0.07	0.78	1.6	-0.12	-0.27	1.03	0.71	1.07	0.99	0.42	-1.01	1	0.36	-0.94	0.76	0.72	-0.35	1	0.39	-0.32	0.93	0.2	0.04	1	0.4	-0.51	1.19	1.05	1.48	1.01	1.65	-0.94	0.67
RP0851	1.74	2.16	1.83	1.25	1.59	1.44	1.36	1.25	1.16	1	0.94	1.02	1.35	1.69	1.56	1.4	1.42	1.28	1.51	1.03	1.32	0.16	0.91	0.81	-0.83	-0.2	-1	-0.96	-0.98	0.93	0.93	0.47	0.69	0.8	0.77	0.69	0.66	0.79	0.88	0.63	0.34	0.99	0.3	1.75	1.23	0.43	1.29	1.05	0.92
RP0852	-0.83	-0.2	-1.33	-1.62	0.69	-0.59	-0.64	0.18	-0.85	-1.22	-0.23	-0.72	-0.78	-0.17	-1.24	-1.56	-0.53	-1.45	-0.01	-1.32	-1.81	1.03	0.47	0.92	0.97	-1.05	-1.6	1	-1.02	-1.04	0.25	-0.78	-1.28	1	-0.56	-1.44	0.55	-1.14	-1.56	1	-0.11	-1.35	1.16	-0.33	0.63	0.98	1.28	-1.36	0.18
RP0853	2.2	2.21	2.76	1.78	1.87	2.22	1.41	1.47	1.53	1.34	1.26	1.48	2.15	2.32	2.3	1.38	1.72	1.84	1.67	0.86	1.06	0.59	0.59	0.99	1	1.24	1	1	-0.05	0.97	1.04	0.89	0.88	1	1.06	0.32	1.01	0.45	0.92	1	0.73	0.44	0.04	0.94	1.72	0.25	1.67	1.62	0.72
RP0854	0.82	1.43	1.01	0.12	0.97	0.32	0.85	0.65	0.46	0.18	0.28	0.16	1.22	1.49	1.54	0.34	0.67	0.3	1.25	0.09	0.48	0.07	0.19	0.12	-0.84	-0.28	-1	-1	-0.97	-0.46	0.13	0.27	-0.1	-0.02	0.07	0.08	-0.54	0.23	-0.65	-0.9	-0.91	0.19	0.67	0.72	1.53	-0.1	1.69	0.37	0.1
RP0855	2.3	1.47	0.85	0.19	1.22	0.84	0.51	1	1.02	0.38	1.01	1.07	0.54	1.25	1.12	0.09	1.2	0.98	1.84	0.69	0.34	1.03	1.02	1.08	1	0.32	1	1	-0.52	0.08	1	0.7	0.5	1	0.91	0.29	0.92	0	0.44	1	0.76	0.3	1.11	1.34	1.39	1	1.08	0.95	0.96
RP0856	1.2	1.61	0.6	0.52	0.53	0.52	-0.73	-0.01	-0.53	-0.66	-0.3	-0.37	-0.05	0.41	-0.19	0.04	0.02	-0.05	1.69	-0.7	-0.18	0.12	0.33	0.35	-0.96	0.79	-1	-1	-0.68	1.05	-0.82	-1.02	-1.97	-1.67	0.12	0.56	-0.51	-1.18	-1.49	-0.95	0.6	0.12	-0.66	2.05	0.86	-0.71	1.52	0.91	-0.65
RP0857	1.6	1.27	1.52	0.01	-0.03	-0.42	-0.73	-0.5	-1.07	-1.15	-1.3	-1.12	0.31	-0.37	-0.68	-0.88	-1.3	-1.41	0.17	-1.34	-1.09	-0.67	-0.57	-0.2	-0.78	-0.51	-1	-1	-1.04	-0.72	-0.3	-0.15	-0.9	0.1	-0.74	-1.42	0.32	-0.58	-0.37	0.1	-0.22	-1.41	-0.38	0.07	1.02	-0.5	1.02	-0.32	-0.35
RP0858	1.65	0.8	1.21	-0.42	-0.06	-0.01	0.12	-0.25	-0.9	-0.88	-0.98	-1.36	0.24	-0.08	-0.46	-0.99	-0.94	-1.23	0.04	-1.21	-1.32	0.04	-0.33	-0.02	-0.91	-0.47	-1	-1	-0.12	-0.92	0.21	0.38	-0.46	0.37	-0.46	-0.76	0.52	-0.54	-0.65	0.4	0.28	-1.07	-0.18	0.13	1.18	-0.13	0.92	-0.46	-0.08
RP0859	2.95	0.48	1.1	0.46	1.54	1.28	1.59	1.24	1.37	1.53	1.4	1.46	1.59	1.3	1.51	1.46	1.55	1.54	1.86	1.47	1.47	0.54	0.87	0.99	0.98	1.14	1	1	-1.01	0.83	0.92	0.74	1.05	1	0.68	0.93	0.85	1.3	1.39	1	-0.11	0.83	1.07	1.84	1.36	0.96	1.14	1.17	0.96
RP0860	1.5	0.75	0.64	1.67	1.01	0.44	1.27	0.72	0.93	1.05	0.65	0.86	1.06	0.34	0.35	0.59	-0.01	-0.11	1.6	0.79	0.79	0.13	0.82	0.94	-0.84	0.84	-1	-1	-1.02	0.68	0.84	0.71	0.66	0.68	0.83	0.35	0.49	0.85	0.66	0.26	0.09	0.46	0.47	1.52	1.33	-0.1	1.09	1.07	0.82
RP0861	1.49	1.17	1.1	0.25	0.96	1.3	1.39	0.41	0.67	0.75	0.43	0.59	2.04	0.96	1.17	1.63	1.26	1.44	0.95	0.11	0.75	-0.94	-0.01	-0.35	-0.99	0.16	-1	-1	-0.98	0.8	0.04	0.3	-0.08	0.12	-0.33	0.29	-0.43	0.55	-0.34	-0.64	-0.72	0.61	-0.49	1.07	1	-1.07	-0.02	0.68	0.12
RP0862	0.47	2.54	1.61	0.51	1.8	0.87	1.35	1.46	1.46	1.34	1.33	1.42	0.92	1.84	1.78	1.07	1.4	1.19	1.11	1.32	0.96	-0.19	0.88	0.4	-0.89	0.31	-1	-0.96	-1	0.84	0.94	0.72	0.84	0.7	0.92	1.12	0.48	0.85	0.66	0.33	0.19	0.99	-0.05	1.17	1.14	0.06	0.95	1	0.94
RP0863	1.06	1.13	0.87	0.48	0.47	0.46	0.8	1.25	1.17	0.99	1.07	1.32	0.91	1.56	1.35	1.24	1.17	1.26	1.85	1.02	0.98	1.03	1.25	1.24	1.01	0.11	1	1	1	-1.01	1.12	0.7	0.19	1	1	-1.1	0.99	-0.5	0.36	1	1	-0.86	1.01	1.02	1.05	1.01	1.93	0.51	0.96
RP0864	0.54	0.45	-2.21	-0.73	0.85	-0.69	0.18	0.67	-0.32	0.11	0.91	0.74	-0.38	0.76	-0.88	0.1	1.09	0.65	1.11	0.69	0.84	1	0.93	1.04	0.98	-0.17	1	1	-0.9	-0.34	0.81	0.1	0.64	1	0.03	0.49	0.92	0.29	1.02	1	-0.05	0.65	1.08	1.01	1.31	1.01	0.97	0.73	0.99
RP0865	0.96	1.34	0.97	0.04	1.27	0.75	0.63	1.66	1.33	0.63	1.4	1.23	1.07	1.59	1.71	0.73	1.39	0.95	2.32	1.67	1.19	0.94	0.65	0.77	1.01	1	1	1	-0.75	0.93	0.37	0.66	0.88	1	-0.88	1.32	0.9	1.73	1.24	1	-0.09	1.06	1.05	1.78	1.36	0.96	0.61	1.25	0.86
RP0866	1.6	2.38	2.37	0.83	0.56	1.32	1.2	1.57	1.34	0.41	0.4	0.27	1.3	2.32	2.1	1.23	1.06	0.94	-0.2	-0.14	0.16	-0.08	0.03	0.09	-0.83	-1.58	-1	-1	-1.01	-0.66	0.07	-0.08	0.18	0.16	-0.4	-0.12	0.04	-0.43	0.16	-0.07	-0.56	-0.09	-0.12	-0.42	0.9	-0.94	0.94	-0.15	0.24
RP0867	1.57	0.56	0.01	1.49	0.98	0.59	1.14	0.63	0.91	1.17	1.03	1.09	1.22	0.75	0.78	1.46	1.22	1.18	1.81	1.07	1.4	1.02	1	1.05	1	1.21	1	1	-0.98	1	0.95	0.36	0.33	1	0.44	0.85	0.91	0.64	0.85	1	0.45	1.05	1.18	2.09	1.34	1.02	1.17	2	1.01
RP0868	2.89	1.77	1.87	2.31	1.31	1.67	2.13	2.12	2.4	2.4	2.09	2.44	2.31	1.91	2.17	2.52	1.63	1.96	1.65	2.27	1.56	0.85	-0.26	0.19	0.68	-0.14	-0.84	1	1	-1	0.95	0.6	-0.65	1	1	-1	0.77	-0.45	-1	1	1	-1	1.07	2.52	1.69	0.64	2.81	1.03	1.24
RP0869	-0.02	0.03	-0.76	0.2	0.24	0.02	0.44	0.65	0.38	0.39	0.66	0.66	-0.02	0.1	-0.46	-0.05	0.22	-0.04	1.65	1.31	0.92	1.01	1.32	1.19	0.98	0.27	1	1	1	-1	1.17	0.91	1	1	1	-0.28	1.02	-0.32	0.87	1	1	-0.67	1.01	0.64	1.06	1.02	1.92	0.56	1.14
RP0870	2.64	3.33	2.58	0.49	2.15	0.94	0.42	1.17	0.69	0.26	0.85	0.63	0.86	1.87	1.1	0.77	1.46	0.97	1.65	0.32	0.96	-0.17	0.46	0.37	0.95	0.44	1	1	-1	0.09	0.79	0.35	0.25	1	0.37	-0.21	0.73	0.6	1.08	1	-0.42	0.5	0.76	1.04	1.32	0.79	1.06	1.01	0.57
RP0871	-0.43	0.63	-0.43	0.83	0.63	0.44	1.13	1	1.11	1.9	1.56	1.82	0.34	0.46	0.2	1.14	0.95	0.98	1.99	1.77	1.34	0.98	0.62	0.78	1	0.68	1	1	-0.32	0.53	1.06	0.85	0.85	1	0.99	1.05	1	1.14	0.85	1	0.64	1.24	1.04	1.69	1.28	1.02	0.58	1.03	1.15
RP0872	2.02	1.4	1.41	0.21	1.69	1.22	2.24	1.27	1.86	1.82	1.41	1.64	2.42	1.71	2.25	1.99	1.72	1.83	1.78	1.71	1.35	0.92	0.96	0.95	1.01	1.2	1	1	-0.12	0.96	0.98	1.23	1.21	1	1.02	1.5	1.02	2.33	1.27	1	0.69	0.94	0.99	1.69	1.64	0.92	1.3	1.23	1.14
RP0873	0.07	0.53	-0.92	-0.07	0.67	0.32	-0.86	0.3	-0.09	-0.87	0.43	0.25	-0.72	0.37	-0.5	-0.42	0.42	0.08	1.08	0.23	0.15	0.14	0.19	0.25	1	0.96	-1.24	1	0.95	-0.56	0.8	1.28	0.57	1	0.92	0.44	1.02	1.32	-0.23	1	0.89	0.11	0.64	1.58	0.63	0.93	0.35	-0.69	0.62
RP0874	1.31	0.55	0.1	0.53	0.08	-0.05	1.27	0.67	0.9	0.51	0.37	0.59	1.08	0.49	0.43	0.53	0.69	0.62	1.93	0.85	1.37	0.84	0.43	0.73	0.98	1	1	1	-0.95	0.82	0.44	0.84	0.66	1	-0.31	0.55	0.88	1.55	0.88	1	-0.04	0.66	0.89	1.79	1.45	0.82	1.21	1.19	0.76
RP0875	2.35	1.46	1.34	1.54	1.92	1.69	1.48	0.79	1.06	1.33	1.13	1.21	2.3	0.77	1.35	2.2	1.33	1.54	1.27	0.91	1.1	0.31	0.57	0.67	-1.24	0.48	-0.66	-0.98	-0.66	0.84	0.59	0.84	0.43	0.49	0.55	0.94	0.31	1.39	0.65	0.18	0.1	0.86	0.13	1.05	1.35	0.27	1.03	1.11	0.6
RP0876	2.09	2.49	1.94	1.3	1.57	1.33	1.97	1.92	1.96	0.88	1.49	1.28	2.35	2.36	2.05	1.38	1.63	1.36	1.74	0.86	1.05	1	1.28	1.02	1.03	1	1	1	1	-0.32	1.08	1.35	0.55	1	1	1.03	0.99	1.12	1	1	1	1.09	1.07	1.86	1.03	1.04	1	0.65	1.3
RP0877	2.37	1.91	1.18	0.43	1.03	0.68	1.74	0.99	1.14	1.55	0.59	1	1.23	1.53	1.6	1.15	0.36	0.47	1.35	1	0.71	1.02	0.82	1.05	0.98	-0.02	1	1	-0.42	-0.57	1.08	0.91	1.22	1	1.14	0.43	1.05	0.17	1.19	1	1.01	0.01	1.09	0.64	1.43	0.95	1.18	0.67	0.95
RP0878	2.11	0.31	1.02	1.51	0.77	1.04	1.27	1.11	1.04	1.15	1.28	1.43	1.45	0.89	0.78	1.03	0.97	0.77	1.57	1.76	1.25	0.99	1.37	1.06	0.99	-0.18	1	1	-0.7	-0.31	1.14	0.92	1.23	1	1.11	1.38	1.02	0.02	0.84	1	1.22	0.49	0.94	1.12	1.3	1	0.93	0.69	1.29
RP0879	1.04	1.79	0.45	0.36	1.73	0.77	1.42	1.73	1.52	1.21	1.59	1.51	0.97	1.74	1.16	0.62	1.49	1.01	0.51	1.5	1.13	1.2	1.12	1.23	-0.93	0.71	-1	-0.99	0.35	0.98	0.98	0.96	0.69	0.54	1.12	1.3	0.65	0.69	0.34	0.43	0.99	1.01	0.65	1.1	1.99	1.21	1.56	1.2	0.94
RP0880	2.39	2.3	2.32	1.68	1.43	1.72	1.06	0.72	0.95	0.79	0.52	0.65	2.07	0.79	1.63	0.74	0.61	0.51	1.52	0.48	0.29	-0.1	0.62	0.25	-1.02	0.01	-1	-0.99	-0.99	0.79	0.78	0.24	0.31	0.37	0.82	-0.06	-0.09	-0.46	0.63	-0.36	-0.15	0.58	0.74	1.97	1.39	0.47	1.39	1.02	0.6
RP0881	0.69	1.2	0.78	-1.29	0.5	0.21	-1.37	-0.47	-0.95	-1.65	-0.76	-1.34	-0.12	0.15	-0.33	-1.06	-0.2	-0.69	-1.4	-1.41	-1.2	-1.56	-2.03	-1.57	-0.79	-1.88	-1	-0.99	-0.97	-1.24	-1.71	-1.07	-2.02	-1.72	-0.7	-1.25	-0.96	-1.33	-1.55	-1.11	-0.5	-1.41	-1.29	-1.37	0.69	-1.87	1.21	-1.77	-2.2
RP0882	1.77	1.42	0.76	0.03	0.64	0.67	1.88	2.02	2.55	1.98	1.75	2.3	1.9	1.66	1.39	0.97	1.26	1.15	1.24	1.58	0.62	0.92	0.69	0.68	0.98	-0.63	1	1	-0.57	-0.84	0	0.05	0.84	1	-1.09	0.96	0.76	0.09	0.93	1	-0.45	0.44	0.79	0.65	1.24	0.94	0.35	0.67	0.85
RP0883	2.18	1.7	1.36	1.64	1.14	1.39	1.76	0.97	0.97	1.49	1.16	1.47	1.96	0.8	0.96	1.35	0.86	1	1.78	1.52	1.26	0.96	1.32	1.12	1.02	0.8	1	1	1	-0.6	1.16	1.16	1.21	1	1	0.83	1.02	0.17	0.94	1	1	0.22	0.96	1.64	1.08	0.98	1.91	0.59	1.23
RP0884	1.36	0.73	0.43	0.87	1.04	1.13	1.2	0.63	0.75	0.8	0.64	0.71	1.03	0.42	0.53	0.72	0.81	0.91	1.12	0.53	0.5	-0.5	0.31	-0.32	-1.1	-1	-1	-1	-1.01	0.4	0.47	0.2	0.14	0.36	0.11	0.5	-0.65	-0.28	-0.64	-0.91	-0.9	0.81	0	1.27	1.34	-0.2	2.19	0.62	0.44
RP0885	1.78	0.21	0.51	0.73	0.23	0.97	1.04	0.83	0.82	-0.11	1.45	1.34	1.32	0.14	0.9	0.1	1.12	1.17	0.59	-0.05	0.06	0.5	-0.01	0.45	0.98	0.67	-1.49	1	0.2	-0.75	-0.13	0.95	-0.24	1	-0.95	-0.18	0.84	1.11	-0.66	1	-0.27	-0.46	0.42	0.86	0.49	0.43	1.43	-0.53	0.4
RP0886	1.88	1.83	0.25	0.07	2.05	1.12	1.03	2.33	2.28	1.15	1.15	1.22	0.42	2.23	1.91	0.65	1.13	0.76	1.8	1.19	0.91	1.03	0.87	0.9	1	1.01	1	1	-0.44	0.98	0.83	0.79	1.04	1	0.12	1.19	0.99	0.3	0.89	1	0.85	0.55	1.08	1.05	1.4	0.99	1.1	1.27	1.01
RP0887	2.91	1.46	1.82	1.37	2.36	2.27	1.66	1.05	1.47	1.52	1.13	1.51	2.07	1.56	2.13	1.9	1.55	1.87	1.92	1.2	1.25	0.75	1.1	1.18	1	1.21	1	1	-0.94	0.97	1.14	0.78	0.97	1	1.16	0.04	1.04	0.64	1.08	1	1.15	0.87	0.87	1.96	1.43	1.03	1.19	1.14	0.98
RP0888	1.09	0.54	0.17	0.31	0.51	0.58	0.79	0.39	0.64	0.57	0.65	0.98	0.35	0.57	0.36	0.82	1.03	1.32	0.12	-0.51	0.13	-0.76	-0.49	-0.68	-1.03	-0.22	-1	-1	-0.9	0.34	-0.98	-0.41	-0.65	-0.83	-0.67	-0.21	-0.76	-0.18	0.15	-0.97	-0.38	0.13	-0.89	0.37	0.99	-0.82	0.94	0.19	-0.91
RP0889	1.24	0.7	0.45	0.6	0.58	0.68	-0.35	-0.91	-0.93	-0.52	-1.01	-0.99	0.52	-0.03	0.27	0.11	-0.24	-0.16	0.04	-0.97	-0.83	0.66	-0.2	0.5	-0.86	-1.65	-1	-1	-1.04	-1	-0.69	-1.15	-1.33	-0.82	-0.8	-0.76	-1.03	-1.57	-0.97	-0.82	-0.94	-0.93	-0.19	-0.75	1.36	-0.3	1.09	0.4	-0.79
RP0890	1.39	1.97	1.42	1.09	1.41	1.44	0.67	0.72	0.52	0.72	0.33	0.28	0.78	1.76	0.91	1.31	1.06	0.76	1.78	0.03	0.17	0.46	0	0.03	-0.93	0.32	-1	-0.99	-1.01	0.54	0.32	0.26	0.05	0.07	0.42	-0.3	-0.38	-0.22	-0.14	-0.54	-0.66	-0.08	1.01	1.79	1.82	1.42	1.93	0.89	-0.02
RP0891	0.89	0.08	0.26	0	-0.18	-0.01	-0.73	-1.7	-1.67	-0.31	-1.69	-0.79	-0.18	-0.61	-0.43	0.23	-0.49	0.08	0.89	-1.64	-0.79	-0.35	-1.84	-0.46	0.97	-0.31	0.98	1	-1.36	-1.04	-1.27	0.19	0.81	1	-1.35	-2.27	0.27	-0.72	1.12	1	-1.64	-3.11	-1.11	-0.11	0.27	-0.64	-0.75	-1.15	-1.52
RP0892	1.53	1.71	1.24	1.22	1.79	1.48	1.3	0.79	0.94	0.74	1.19	1.44	1.22	0.94	0.89	1.03	1.45	1.19	1.84	0.85	1.02	0.95	1.15	0.99	1.01	1.73	1	1	1	1.04	1.04	1.37	0.55	1	1	0.98	0.97	1.85	1	1	1	1.25	1	2.07	0.91	0.98	1	1.19	1.2
RP0893	3.26	2.53	1.63	1.05	2.05	1.12	1.69	1.04	1.21	1.2	1.03	1.24	2.42	1.5	1.62	1.47	1.46	1.41	1.8	1.17	1.27	0.95	0.87	0.88	1.01	1.07	1	1	-0.9	0.99	0.6	0.11	0.7	1	-0.65	1.26	0.88	1.35	1.33	1	-0.19	1.12	1.03	1.89	1.3	0.98	1.03	1.23	0.92
RP0894	1.65	-0.37	-0.08	0.28	0.48	0.44	-0.58	-0.09	-0.69	-0.03	0.03	-0.23	-0.79	-0.68	-0.99	-1.23	-0.4	-1.02	-0.01	-0.31	-0.84	0.08	0.42	0.27	-0.86	-0.64	-1	-1	-0.64	-0.68	0.27	0.34	-0.58	-0.2	0.31	0.09	-0.09	-0.21	-0.34	-0.57	-0.05	-0.16	-0.01	0.08	1.23	-0.16	1	-0.31	0.21
RP0895	1.23	1.84	1.94	1.88	1.74	2.15	0.86	0.93	1.05	0.78	1.01	0.96	1.13	1.37	1.75	1.23	1.4	1.46	1.71	0.82	1.31	0.25	0.23	0.27	0.96	0.68	1	1	-0.99	0.18	0.66	-0.12	1.1	1	0.07	-0.36	0.88	0.12	1.23	1	-0.25	0.06	0.91	1.57	1.36	0.88	1.33	1.13	0.5
RP0896	2.08	0.04	0.67	0.82	0.65	0.63	1.67	0.62	0.95	1.21	0.73	1.14	2.16	0.51	1.09	1.32	0.78	1.07	1.86	0.79	1.44	0.44	1.06	0.9	1	1.21	1	1	-0.97	1.03	0.88	0.09	0.31	1	0.32	0.58	0.81	0.81	0.88	1	-0.1	1.39	0.9	2.14	1.61	1.03	1.01	1.61	0.95
RP0897	1.14	1.94	1.45	2.13	2.05	2.63	0.25	2.42	1.24	0.23	1.46	0.97	0.73	3.61	2.22	1.29	2.67	1.96	0.85	-0.01	0.86	1.03	0.68	1.04	-0.88	-0.24	-1	-1	-0.81	0.03	0.29	-0.06	-0.48	0.48	-0.37	0.07	0.18	0.4	0.32	0.01	-0.21	0.71	0.56	0.92	1.35	0.05	0.94	0.91	0.48
RP0898	1.78	2.51	2.05	0.62	2.78	1.95	1.03	1.89	1.35	0.91	0.88	0.99	0.68	2.91	2.22	0.85	1.45	1.29	1.15	0.37	0.99	-0.45	-0.08	-0.15	-0.8	0.85	-1	-1	-0.97	0.7	0.49	0.48	0.08	0.77	-0.02	0.01	0.38	0.87	0.39	0.44	-0.52	0.5	-0.17	1.22	1.06	-0.46	1.09	0.87	0.32
RP0899	2.86	1.97	1.3	0.85	1.55	1.52	1.9	1.26	1.34	1.46	1.49	1.44	2.53	1.36	1.45	1.72	1.31	1.47	2.67	1.62	1.35	0.46	0.95	0.83	1	1	1	1	-0.67	0.92	1.02	0.97	1.19	1	0.94	1.3	1.03	1.35	1.24	1	0.84	1.04	0.92	1.73	1.34	0.98	1	1.13	1.1
RP0900	1.77	2.94	2.19	1.48	1.9	1.43	0.67	1.42	1.12	0.52	1.04	0.88	0.86	2.14	1.63	0.62	1.61	1.49	1.18	0.45	0.84	-0.1	0.49	0.24	-1.03	0.22	-1	-0.99	-1.03	0.8	0.57	0.26	0.14	0.42	0.33	0.16	-0.27	0.28	-0.3	-0.66	-0.6	0.83	0.44	0.89	1.26	-0.1	1.15	1	0.62
RP0901	0.11	1.36	1.18	-0.19	1.25	0.47	0.5	0.86	0.78	0.79	0.86	1.07	-0.27	1.18	0.76	0.08	0.91	0.71	0.27	0.88	0.67	1.02	0.78	1.01	-0.93	-0.35	-1	-1	-0.09	-0.11	0.6	0.62	0.16	0.21	0.65	1.01	0.27	0.56	-0.12	-0.11	0.41	0.91	0.35	0.76	1.26	-0.12	1.15	0.88	0.7
RP0902	1.64	1.85	0.21	-0.74	0.06	-0.97	1.06	1.86	1.49	0.3	0.33	0.17	1.1	2.05	1.38	0.25	0.46	-0.08	1.22	0.09	0.09	0.81	0.38	0.57	0.97	-0.41	-0.56	1	-0.35	-0.94	-0.33	-0.71	-0.55	1	-1.22	-0.01	0.36	-0.56	-0.52	1	-0.44	-0.22	0.67	0.68	1.11	0.81	0.56	-0.23	0.06
RP0903	1.72	1.54	1.31	1.35	1.21	1.45	1.6	1.42	1.45	1.7	1.56	1.78	1.69	1.19	1.36	1.74	1.34	1.52	1.73	1.76	1.41	0.93	1.52	1.17	1.03	0.65	1	1	1	-0.77	1.17	1.07	1	1	1	0.68	1.02	0.09	0.87	1	1	0.32	0.93	1.59	1.09	0.95	1.91	0.54	1.24
RP0904	1.79	0.71	0.99	1.11	0.48	0.9	1.14	-0.09	0.65	0.9	0.1	0.8	1.1	-0.26	0.18	0.72	-0.12	0.43	1.54	0.5	0.6	0.95	0.75	0.96	0.94	1.1	1	1	1	-0.23	1.01	1.2	1.17	1	1	0.25	0.95	0.34	1.12	1	1	-0.21	0.92	1.08	0.9	0.97	1	0.76	0.87
RP0905	0.72	0.91	0.79	0	-0.67	-0.54	0.61	-0.02	0.01	0.25	-0.3	-0.07	-0.55	0.16	0.16	-0.18	-1.05	-0.89	-0.03	-0.29	-0.59	-1.27	-0.7	-1.47	-0.79	-0.44	-1	-1	-1.03	-0.42	-0.01	0.03	-0.12	0.49	-0.61	-0.42	0.07	0.48	-0.06	0	-0.88	0.02	-1.07	-0.19	1.11	-1.22	1.79	-1.36	-0.19
RP0906	1.48	1.22	0.25	0.53	0.6	0.43	0.87	1	1.09	0.73	1.08	1.3	0.56	1.1	0.47	0.6	0.78	0.59	0.97	0.92	0.77	0.1	0.86	0.65	-0.95	0.65	-1	-1	-0.14	1.02	0.71	1.1	0.3	0.23	1.08	1.34	0.39	1.58	0.57	-0.13	0.97	1.19	-0.43	1.53	0.98	-0.42	0.95	1.1	0.82
RP0907	1.45	0.64	1.27	1.36	1.28	1.4	0.33	0.49	0.94	0.79	0.9	0.9	-0.1	0.3	0.66	0.46	1.06	0.83	1.88	0.85	0.88	-0.37	-0.08	-0.38	1	1.15	1	1	-0.36	0.99	0.77	0.66	0.67	1	0.29	0.34	0.91	0.65	0.55	1	0.29	0.61	0.4	1.55	1.23	0.76	1.06	0.84	0.65
RP0908	1.98	1.65	2.25	0.85	1.19	1.25	1.06	0.81	0.65	0.87	0.82	0.66	1.09	1.57	1.45	1.5	1.46	1.46	1.93	0.45	1.61	1.02	0.57	1.11	-0.76	0	-1	-0.96	-0.99	0.84	0.45	-0.33	0.06	0.55	-0.2	0.13	0.2	-0.45	0.78	0.37	-0.72	0.86	1.1	1.93	1.47	1.31	1.55	1.28	0.55
RP0909	2.52	-0.07	-0.88	0.92	-0.5	0.16	0.66	-0.64	0.16	0.35	-0.29	0.19	1.08	-0.45	0.05	0.33	-0.35	0.01	1.34	0.54	0.31	0.2	0.33	0.41	1	-0.18	1	1	-0.59	-0.48	0.62	0.23	0.99	1	-0.47	0.5	0.94	-0.28	1	1	0.45	-0.14	0.74	0.85	1.22	0.97	-0.16	0.13	0.61
RP0910	2.82	2.18	2.95	3.25	2.03	2.8	1.35	0.78	1.57	1.86	0.95	1.73	1.6	1.16	1.69	2.06	0.97	1.61	1.62	0.49	0.5	0.29	0.39	0.55	1.01	0.34	0.11	1	-0.75	-0.34	0.84	1.09	0.93	1	0.82	0.07	1.04	0.8	0.64	1	0.79	-0.19	0.76	1.02	0.15	0.89	-0.18	-0.08	0.68
RP0911	1.86	1.67	2.35	1.86	1.69	1.61	1.35	0.73	0.7	1.12	0.81	0.93	1.28	1.02	0.65	1.55	0.89	0.85	0.82	0.91	1.21	-0.57	0.65	0.58	-0.96	0.19	-1	-0.99	-1.02	0.79	0.77	0.62	0.81	0.8	0.57	0.56	0.46	0.98	1.02	0.5	-0.07	0.71	0	0.83	1.13	-0.68	0.95	0.91	0.77
RP0912	2.37	2.39	2.46	2.36	2.4	2.37	1.7	1.81	1.81	1.88	1.72	1.93	1.28	1.76	1.68	1.75	1.68	1.9	2.21	1.98	1.78	0.52	0.76	0.78	1	1.97	1	1	-1	0.9	1.04	0.76	0.76	1	0.89	1.16	0.99	1.62	1.18	1	0.48	1.26	1.06	2.92	1.33	0.99	1.72	1.16	1.11
RP0913	1.85	0.74	0.85	0.4	0.15	-0.1	1.16	0.46	0.71	-0.31	-0.45	-0.36	1.2	0.59	1.11	-0.34	-0.58	-0.57	0.41	-1.02	-1.38	0.83	0.32	0.56	0.99	-0.54	-0.74	1	-0.01	-1.07	-0.06	-0.24	-0.6	1	-1.08	-0.79	0.53	-0.8	-0.55	1	-0.33	-0.92	0.73	0.54	1.15	0.83	0.59	-0.19	0.16
RP0914	1.75	0.49	1.4	1.18	0.5	1.35	-0.43	0.06	-0.76	-0.03	-0.1	-0.23	-0.05	-0.18	-0.44	-0.08	-0.19	-0.5	0.55	-0.22	-0.25	-0.05	0.42	0.45	-0.87	-1.09	-1	-1	-1.02	-0.55	0.43	-0.06	-0.19	0.13	0.23	-0.2	0.2	-0.75	0.1	-0.11	0.18	-0.59	0.47	0.02	1.42	-0.23	1.41	0.29	0.28
RP0915	0.57	0.77	0.6	-0.24	0.03	0	0.92	-0.23	0.16	0.58	-0.14	0.19	0.48	-0.24	0.18	0.63	-0.17	0.25	1	-0.26	0.31	-0.38	-0.19	-0.73	-1.28	0.5	-1	-1.02	-1.05	-0.53	0.1	0.05	-0.11	0.11	-0.15	-0.2	-1.1	-0.24	-0.87	-1.11	-1.22	0.01	-0.58	1.35	1.65	0.59	-0.38	0.52	-0.12
RP0916	1.76	3.17	3.09	1.28	3.47	2.96	0.78	1.48	1.3	1	1.24	1.12	0.35	2.04	1.88	0.86	1.78	1.55	2.26	1.36	1.36	0.52	0.87	0.9	-0.85	0.66	-1	-1	-0.98	0.82	0.9	0.71	0.99	0.89	0.69	0.99	0.6	1.68	0.99	0.56	-0.21	0.85	0.8	2.03	1.54	0.18	1.47	1.14	0.97
RP0917	1.11	1.18	0.55	0.7	0.79	0.85	0.46	0.33	-0.08	0.25	0.51	0.47	0.12	0.31	-0.21	0.27	0.71	0.63	2.1	0.3	0.84	0.18	0.06	0.18	1	0.24	1	1	-0.59	-0.11	0.19	0.34	0.49	1	-0.68	0.01	0.82	0.78	0.89	1	-0.39	0.24	0.63	0.98	1.27	0.82	-0.17	0.42	0.34
RP0918	1.36	2.21	1.86	0.15	1.11	0.11	0.15	0.9	0.84	0.19	0.03	0.22	1.78	2.03	1.77	0.26	0.31	0.03	0.55	0.04	0.34	-0.7	0.18	-0.12	-0.91	0.42	-1	-1	-0.41	0.98	0.34	0.6	-0.34	-0.3	0.72	0.65	0.03	1	-0.12	-0.52	0.56	0.93	-0.85	0.15	0.85	-1.1	0.93	0.97	0.32
RP0919	1.27	0.86	0.59	0.37	0.01	-0.38	-0.09	-1.24	-1.59	-0.96	-1.44	-1.95	1.71	0.18	-0.17	0.11	-0.42	-0.87	0	-1.39	-0.57	-0.72	-1.54	-0.66	-1.09	-1.42	-1	-1.01	-1.08	-1.33	-1.32	-1.36	-1.44	-1.62	-0.66	-1.89	-0.61	-1.35	-1.26	-0.58	-0.48	-1.63	-0.44	-0.09	1.24	0.18	-0.54	-1.73	-1.91
RP0920	2.36	1.69	1.34	1.88	1.55	1.62	1.3	0.71	0.77	1.27	1.05	1.37	1.88	0.91	0.9	1.55	1.25	1.14	2.12	1.34	1.15	1	1.48	1.03	1.03	1.73	1	1	1	1.03	1.08	1.2	0.55	1	1	1.02	0.99	2.47	1	1	1	1.22	1.02	2.36	1.07	1.03	2.12	0.95	1.44
RP0921	2.22	1.86	1.76	2.04	1.31	1.8	2.01	1.28	1.52	1.94	1.34	1.81	1.98	1.57	1.67	2.23	1.41	1.85	1.71	1.48	1.15	0.97	1.25	1.19	1.03	0.25	1	1	1	-1	1.17	0.89	1	1	1	-0.1	1.02	-0.34	0.87	1	1	-0.47	0.97	1.33	1.07	0.99	1.91	0.62	1.08
RP0922	2.27	1.36	1.76	1.02	1.05	1.21	1.13	1.75	1.96	1.74	1.78	2.12	0.87	1.72	1.53	0.97	1.57	1.51	1.92	1.98	1.15	0.99	0.86	0.89	1	1.31	1	1	0.49	1.04	0.75	1.18	1.09	1	0.19	1.01	1.03	2.31	1.24	1	0.64	1.13	1.4	1.96	1.27	1.02	1.31	1.18	1.15
RP0923	2.27	1.76	3	1.3	1.11	1.06	0.66	0.45	0.79	1.15	-0.14	0.43	0.87	0.99	1.19	0.96	0.08	0.32	0.83	0.11	0.28	-0.18	-0.21	0	-0.84	-0.23	-1	-1	-0.99	0.07	-0.95	-0.31	-0.66	-0.43	-1.22	0.09	-0.12	-0.21	0.67	-0.32	-0.7	-0.15	-0.63	0.7	0.62	-0.85	-0.33	0.3	-0.2
RP0924	0.63	-0.06	0.72	0.46	-0.15	0.68	0.87	-0.32	0.4	0.13	-0.84	-0.09	0.84	-0.45	0.45	0.5	-0.64	-0.06	0.19	-1.81	-1.49	1.03	0.94	0.98	-0.15	-1	-1	1	-0.42	-1	0.21	-0.59	-1.75	1	-0.65	-1	-0.15	-0.96	-1.44	1	0.3	-1	-0.48	-0.47	1.73	1.01	1.1	-0.71	0.27
RP0925	2.46	2.44	2.23	1.68	1.7	1.95	2.12	1.57	1.55	1.11	1.22	1.54	2.4	1.88	1.99	1.76	1.42	1.52	2.12	1.34	1.15	1	1.48	1.03	1.03	1.73	1	1	1	1.03	1.08	1.2	0.55	1	1	1.02	0.99	2.47	1	1	1	1.22	1.02	2.36	1.07	1.03	2.12	0.95	1.44
RP0926	1.21	2.14	1.92	1.46	2.52	2.39	0.86	1.32	1.25	0.71	1.14	1.07	1.29	1.48	1.83	1.2	1.71	1.55	1.17	0.69	0.83	-0.57	0.67	0.35	-0.78	0.24	-1	-1	-1.04	0.78	0.8	0.53	0.52	0.6	0.74	0.31	0.14	0.8	0.15	-0.24	-0.12	0.6	0.13	0.93	1.17	-0.7	1.16	0.9	0.7
RP0927	-0.19	0.83	0.89	-0.12	0.52	0.31	-0.21	1.37	1.13	0.81	1.55	1.69	-0.52	1.13	0.97	0.68	1.39	1.25	2.32	1.54	1.2	0.89	0.51	0.71	0.98	1.03	1	1	-0.55	0.84	0.39	1.02	0.84	1	-0.51	0.95	1.01	1.54	0.63	1	0.38	0.76	0.97	1.57	1.33	0.89	1.15	1.23	0.86
RP0928	0.56	0.43	-0.17	0.21	-0.27	-0.08	0.24	0.21	0.6	0.79	0.23	0.85	-0.34	-0.2	0.02	0.6	0.05	0.4	0.58	0.02	-0.18	0.44	-0.32	0.28	0.91	0.12	-1.25	1	-0.65	-1.26	-0.73	0.76	0.01	1	-1.09	-0.55	0.54	1.07	0.05	1	-0.94	-1.03	0.13	0.57	0.84	0.36	0.17	-0.86	0.07
RP0929	2.76	2.77	2.65	1.1	0.85	1.04	1.48	2.82	2.09	0.83	0.47	0.7	1.51	2.51	2.52	0.57	0.39	0.28	1.56	0.55	0.62	-0.12	-0.47	-0.28	1	-0.04	0.99	1	-0.51	-0.9	0.55	0.68	1.19	1	0.29	-0.3	0.98	0.14	0.96	1	0.19	-0.62	0.57	0.57	0.58	0.82	-0.39	-0.38	0.16
RP0930	1.62	2.61	3.16	1.42	2.92	2.56	1.35	1.14	1.29	1.17	1.08	1.23	1.38	1.65	1.72	0.85	1.43	1.31	1.32	1.14	1.2	-0.49	0.56	0.31	-1.25	0.28	-1	-1	-1.01	0.8	0.7	0.55	0.93	0.84	0.43	0.62	0.17	1.25	1.1	0.34	-0.46	0.72	-0.17	1.21	1.18	-0.37	1.03	0.91	0.68
RP0931	2.63	2.72	2.49	1.97	2.09	2.22	2.69	1.98	2.03	1.46	1.59	1.8	3	2.33	2.46	2.13	1.86	1.85	2.18	1.46	1.23	0.99	1.6	1.03	1.04	1.73	1	1	1	1	1.12	1.2	0.55	1	1	1.17	1.01	2.47	1	1	1	1.31	1	2.39	1.08	1.02	2.12	0.87	1.52
RP0932	2.08	1.05	1.35	0.75	0.89	1.05	1.2	1.04	1.55	1.09	0.66	1.14	1.06	1.07	1.52	0.84	0.55	1.2	1.74	0.78	0.92	0.84	0.57	0.89	0.99	0.08	1	1	-0.14	-0.97	0.85	1.11	1.24	1	0.88	0.28	1.01	0.57	1.13	1	0.55	-0.17	1.37	0.58	1.43	0.82	1.89	0.32	0.81
RP0933	0.61	0.86	0.18	0.59	0.5	0.61	-0.76	-0.83	-0.29	-0.26	-0.26	0.11	-0.61	-0.16	0.01	0.16	0.03	0.26	1.05	-0.62	0.17	0.77	0.23	0.84	0.85	0.95	1	1	1	-0.53	0.78	1.44	0.55	1	1	-0.35	0.76	0.79	1	1	1	-0.11	0.71	1.19	0.7	0.73	0.93	0.47	0.33
RP0934	0.62	2.03	2.22	0.55	1.78	1.42	0.68	1.36	1.22	0.07	1.08	0.75	0.49	1.38	1.14	0.03	1.02	0.61	1.89	0.27	0.12	0.85	0.58	0.71	0.98	0.53	1	1	-0.93	0.4	0.27	-0.19	0.1	1	-0.95	0.19	0.8	-0.34	-0.19	1	0.06	-0.25	0.84	1.22	1.45	0.84	1.19	0.96	0.67
RP0935	1.31	0.29	0.44	-0.21	-1	-0.13	0.54	1.21	0.66	-0.05	-0.09	0.28	0.34	0.28	-0.26	-0.27	-0.76	-0.49	0.91	0.2	-0.68	0.67	-0.16	0.39	1	-0.52	1	1	-0.33	-1.07	-0.31	0.18	0.75	1	-1.02	-0.77	0.71	-0.44	0.75	1	-0.72	-1.26	0.55	0.33	1.51	0.65	0.39	0.05	0.15
RP0936	1.35	0.66	0.22	1.32	0.66	0.65	1.15	0.53	0.79	1.17	0.77	1.06	1.47	0.96	0.8	1.34	0.88	1.01	1.31	0.76	0.99	0.84	0.97	0.85	-0.99	-1	-1	-0.96	-1	1.05	0.66	-0.31	-0.15	-0.19	0.61	1.84	0.46	-0.71	-0.52	0.37	1.2	1.04	0.13	2.22	1.2	0.74	1.74	1.14	0.77
RP0937	1.9	1.08	1.39	2.05	1.06	1.55	0.8	0.03	0.63	1.07	0.4	0.94	1.05	0.19	0.53	1.46	0.56	0.95	1.73	0.52	0.92	0.83	0.86	0.94	0.94	1.73	1	1	1	1.03	1.03	1.36	0.55	1	1	0.76	0.96	1.52	1	1	1	1.06	0.88	1.8	1.43	0.81	0.95	1.17	0.96
RP0938	1.87	2.82	2.52	1.12	1.95	1.64	1.26	2.29	1.87	-0.64	0.71	0.15	1.81	2.76	2.61	-0.15	1.16	0.58	0.74	-1.28	-1.13	-0.66	-1.41	-1.22	-0.88	-1.16	-0.94	-1	-0.72	-1.08	-1.51	-0.25	-1.6	-1.53	-1.13	-0.51	-0.82	-0.46	-1.09	-1.16	-0.5	-0.91	-1.07	-0.33	0.9	-0.96	-0.94	-1.12	-1.21
RP0939	2.26	0	0.7	0.96	-0.02	0.86	1.85	-0.04	1.32	0.04	0.26	0.88	2.34	-0.77	0.85	0.07	0.06	0.74	0.46	-1.43	-1.09	0.43	-0.69	0.17	0.91	0.5	-1.27	1	0.37	-1.23	-0.48	1.17	-0.79	1	-0.78	-1.4	0.74	0.98	-1.31	1	-0.49	-1.73	0.43	0.55	1.18	0.34	2.11	-0.9	-0.19
RP0940	-0.18	-0.48	-0.08	0.27	-0.48	0.04	-0.42	-0.33	-0.71	-0.11	-0.15	-0.02	-0.23	-0.27	-0.32	0.28	-0.08	0.27	0.91	0.31	0.32	0.96	0.71	0.96	0.89	1.1	-0.69	1	1	-0.7	0.83	1.35	1.11	1	1	0.83	0.81	1.76	0.88	1	1	0.46	0.94	1.58	1.04	0.99	1	-0.66	0.77
RP0941	1.6	0.08	0.54	1.68	-0.24	0.72	1.73	0.85	0.98	1.74	0.7	1.6	2.12	1.02	1.33	2.31	0.51	1.58	0.13	0.65	0.28	1.01	0.88	1.2	0.92	0.84	-0.93	1	1	-0.95	1.17	1.13	0.05	1	1	-0.52	1.01	0.3	-0.44	1	1	-0.72	0.98	1.48	-0.28	1.02	1.92	-1.37	0.86
RP0942	0.75	1.98	1.21	0.98	2.22	1.93	-0.72	1.17	0.75	-0.09	0.85	0.31	-0.99	1.29	0.67	-0.16	1.09	0.24	-0.23	-0.2	-0.59	0.17	0.3	0.31	-0.93	-0.81	-1	-1	0.03	-0.94	0.02	0.5	-0.36	-0.27	-0.21	0.41	-0.02	0.05	-0.33	-0.53	0.09	-0.05	-0.33	-0.27	1.08	-0.59	1.24	0.16	0.34
RP0943	2.05	1.43	0.19	2.14	1.49	1.9	1.69	1.57	1.49	2.16	1.94	2.1	1.55	1.45	1.07	1.97	1.72	1.86	1.83	1.87	1.54	0.95	0.93	0.88	0.97	1.27	1	1	-0.98	1.05	0.86	0.52	1.18	1	0.28	1.35	0.99	0.42	1.01	1	0.85	0.9	1.13	2.14	1.3	0.98	1.15	1.17	1.09
RP0944	1.97	0.53	1.12	1.19	0.07	0.76	1.74	0.49	0.75	1.64	1.1	1.34	1.97	0.73	0.96	1.51	0.75	0.82	1.73	1.59	0.97	0.05	0.56	0.24	0.92	-0.05	1	1	-0.15	-0.6	0.94	0.75	1.03	1	0.66	1.43	0.91	0.11	0.75	1	0.78	0.67	0.43	0.71	1.22	0.93	1.03	0.02	0.77
RP0945	1.72	-0.92	-0.24	1.19	-1.14	-0.85	1.34	-1.49	-0.52	0.24	-1.67	-1.3	1.36	-1.05	-0.08	0.87	-1.35	-1.05	0.1	-1.68	-1.32	-1.1	-1.01	-1.13	-0.95	-1.11	-0.98	-1	-1	-1	-0.81	-0.54	-1.69	-1.22	-0.52	-1.26	-0.68	-0.94	-0.46	-0.95	-0.23	-1.06	-0.97	-0.49	1.12	-0.78	0.93	-1.76	-1.2
RP0946	2.41	1.45	0.8	0.74	1.57	1.08	1.33	0.81	1.07	0.81	0.75	1.18	1.47	0.77	0.91	0.78	0.76	0.77	2.03	1.1	0.93	0.98	0.68	0.78	0.99	1.63	1	1	-1	0.57	0.41	-0.39	0.5	1	-0.95	0.88	0.77	-0.36	0.2	1	0.09	0.31	1.07	2.81	1.67	1.01	1.66	1.07	0.73
RP0947	0.98	2.86	1.68	0.68	2.43	2.02	0.59	2.13	1.4	0.45	1.08	0.8	0.9	2.47	1.66	0.27	1.17	0.6	1.8	0.52	0.34	0.69	0.45	0.68	-0.8	1.05	-1	-1	-1	0.99	0.22	-0.14	0.24	0.49	-0.64	0.49	0.55	-0.43	-0.03	0.52	0.27	-0.15	0.12	1.61	1.36	-0.2	1.49	1.08	0.45
RP0948	-0.08	0.95	1.07	-0.77	0.04	-0.34	-0.47	1.28	0.67	-0.3	0.71	0.14	-0.44	1.75	0.94	0.2	0.69	0.32	1.43	-0.24	-0.02	0.71	0.31	0.5	1	-0.19	1	1	-0.22	-0.92	-0.08	-0.12	-0.05	1	-1.05	-0.47	0.75	-0.13	0.58	1	-0.44	-0.65	0.61	0.53	1.56	0.69	0.45	0.57	0.39
RP0949	0.75	0.3	-0.11	0.08	-0.32	-0.24	0.99	0.56	0.89	1	0.7	1.11	1	0.89	1	1	0.7	0.93	0.01	0.67	0.47	1.02	0.88	1.32	0.68	-0.14	-0.84	1	1	-1	0.95	0.6	-0.65	1	1	-1	0.77	-0.45	-1	1	1	-1	0.55	1.36	-0.52	1.02	1.92	-0.62	0.63
RP0950	1.88	2.29	2.19	1.62	1.35	1.51	1.66	1.47	1.71	1.01	1	1.29	1.64	1.83	2.09	1.45	1.12	1.22	1.8	1.2	0.95	0.98	1.19	1	0.93	1.73	1	1	1	1.03	1	1.23	1.06	1	1	1.26	0.95	2.4	1.12	1	1	1.17	0.99	2.16	1.01	1.02	2.12	1.2	1.23
RP0951	0.53	0.12	-0.4	0.57	-0.09	-0.32	1.54	0.91	1.24	1.52	1.22	1.37	1.64	1.12	1.05	1.73	1.22	1.39	0.92	1.19	1.2	1.03	0.86	0.98	1	-0.2	1	1	-0.52	-0.73	0.95	0.89	1.19	1	0.86	0.58	1	0.71	1.27	1	0.3	0.4	1.02	0.57	1.39	1	1.21	0.61	1.01
RP0952	2.09	2.66	1.55	1.28	2.14	2.03	0.8	1.24	1.2	0.47	0.76	0.7	1.25	1.95	1.71	0.51	1.45	1.09	0.62	0.21	0.03	-0.09	0.28	-0.02	-1.02	0.23	-1	-0.98	-0.84	-0.32	0.53	0.47	0.21	0.04	0.73	0.29	0.04	-0.27	0.33	-0.35	0.11	0.18	0.38	0.48	1.3	0.48	1.08	0.31	0.4
RP0953	1.15	1.54	0.84	-0.01	-0.53	-0.81	-0.54	0.35	0.35	-0.08	0.6	0.53	-0.99	0.05	-0.25	-1.01	-0.02	-0.41	0.1	0.68	0.03	0.26	0.23	0.43	0.96	-0.8	1	1	-0.97	-1.15	0.72	0.31	0.79	1	0.32	-0.47	0.94	-0.57	0.15	1	0.45	-0.97	1.59	-0.51	1.43	0.69	1.26	-0.75	0.46
RP0954	2.44	0.53	0.9	1.53	-0.54	0.44	2.89	0.09	1.04	2.02	0.5	1.41	2.78	0.25	0.83	1.76	0.27	0.95	1.65	0.42	0.45	0.92	0.4	0.77	1	-0.24	1	1	-0.65	-0.62	0.58	0.69	0.74	1	0.18	-0.02	1	0.35	0.33	1	0.49	-0.31	0.98	0.66	1.64	0.93	0.65	0.58	0.71
RP0955	1.29	1.37	1.76	0.92	0.58	0.94	-0.18	1.28	0.9	-0.61	0.34	0.12	0.42	1.32	1.65	-0.34	0.39	0.23	0.4	-0.18	0.31	-0.68	0.16	0.18	-0.77	0.23	-1	-0.99	-1.01	0.73	0.23	0.11	-0.1	0.1	-0.18	0.15	0.03	0.18	-0.43	-0.39	-0.05	0.11	-0.31	0.28	1.04	-1.08	1.02	0.78	0.25
RP0956	0.54	0.14	-0.01	0.77	0.05	0.31	0.61	0.3	0.43	0.39	0.18	0.47	0.42	0.39	0.48	0.71	0.27	0.45	1.49	0.45	1.1	-0.07	0.55	0.48	0.98	-0.07	1	1	-0.95	-0.46	0.81	0.42	0.27	1	0.09	0.48	0.9	0.93	1.11	1	-0.16	0.69	0.6	0.74	1.26	0.76	-0.16	0.09	0.77
RP0957	2.06	0.95	0.28	1.57	0.99	0.67	1.13	0.25	1.05	1.46	0.83	1.35	0.4	0.36	0.06	1.22	0.89	0.86	1.97	0.88	0.97	0.14	0.05	0.15	1	0.54	1.02	1	-0.13	0.15	0.38	0.89	0.65	1	-0.36	0.58	0.96	1.19	0.55	1	0.26	0.48	0.68	1.24	1.96	0.91	0.12	0.83	0.55
RP0958	1.46	0.08	0.62	0.64	-0.87	0.26	1.04	-0.58	0.12	1.05	-0.21	0.41	0.78	-0.52	0.19	0.66	-0.62	-0.17	0.99	0.38	-0.15	0.29	0.46	0.39	1	-0.39	1	1	0.23	-0.96	1.01	0.53	0.81	1	0.8	0.06	1	-0.43	0.94	1	0.99	-0.52	0.63	-0.26	1.26	0.9	1.1	-0.19	0.76
RP0959	2.12	1.42	1.27	1.11	-0.36	-0.09	0.78	0.65	0.1	0.28	0.08	0.14	0.89	0.79	0.16	0.16	-0.19	-0.3	1.25	-1.03	-1.1	0.4	0.11	0.36	0.95	0.06	1	1	-0.19	-1	0.47	0.47	-0.86	1	-0.11	-1.15	0.73	-0.06	-0.55	1	-0.56	-1.01	0.94	0.61	1.36	0.92	1.24	0.47	0.23
RP0960	0.17	-0.79	-1.14	-0.23	-0.41	-0.79	-1.44	-0.33	-1.11	-0.66	-0.81	-0.74	0.17	-0.17	-0.29	-0.34	-0.65	-0.53	-0.64	-0.67	-1.01	-0.8	-0.69	-0.48	-0.86	-1.1	-1	-1	-1.11	-0.94	-0.55	-0.57	-0.48	-0.11	-0.93	-0.62	-0.22	-1.02	-0.53	-0.06	-0.5	-1	-0.99	-1.04	1.46	-0.85	-1.1	-0.93	-0.73
RP0961	0.7	1.72	1.25	-0.07	0.64	0.71	1.07	1.34	1.51	0.57	1.03	1.07	0.81	1.46	1.22	0.39	0.98	0.63	0.48	0.73	0.86	0.09	0.81	0.68	-0.9	0.3	-1	-0.99	-0.77	0.99	0.64	0.69	0.32	0.14	0.9	1.12	0.26	1.14	0.07	-0.09	0.42	1.15	-0.31	-0.16	0.88	-1.02	0.89	0.98	0.86
RP0962	2.08	1.56	1.27	1.61	1.03	1.58	1.66	0.58	1.12	1.46	0.82	1.24	1.63	0.36	1.07	1.19	0.51	1.02	1.41	0.78	0.82	0.21	0.65	0.69	-1.03	0.16	-1	-0.99	-1.01	0.93	0.64	0.28	0.63	0.51	0.38	0.55	0.2	0.4	0.05	-0.2	0.14	0.71	0.45	1.33	1.35	0.08	1.07	1.02	0.69
RP0963	2.4	2.28	2.63	1.9	1.65	1.96	1.8	1.44	1.58	1.62	1.29	1.49	2.47	1.61	2.29	2.01	1.3	1.66	2.13	1.51	1.63	0.81	0.84	0.87	0.99	1.97	1	1	-1	1.04	0.94	0.56	1.06	1	0.39	1.39	1.03	1.15	1.38	1	0.44	1.12	0.73	2.73	1.46	0.77	1.76	1.15	0.99
RP0964	1.11	0.16	-0.77	0.94	0.1	0.58	1.29	0.6	0.15	1.14	0.38	1.31	1.23	0.27	-0.13	1.11	0.2	0.92	0.82	0.61	0.06	0.99	0.97	0.87	0.89	-0.79	1	1	-0.97	-0.92	0.54	-0.73	0.64	1	-0.95	0.73	0.68	-0.9	0.65	1	0.13	-0.03	0.81	0.53	1.26	1.03	1.05	0.74	0.87
RP0965	2.11	2.85	2.12	1.42	2.35	2.88	0.34	1.52	0.79	-0.23	0.74	0.19	1.37	2.31	1.69	0.48	1.76	1	-0.24	-0.74	-0.58	-0.85	0.32	0.06	-1.01	-1.21	-1	-1	-0.99	-0.53	0.28	-0.01	-0.69	0.03	0.05	-0.52	0.05	-0.39	-0.27	-0.45	0.02	-0.24	-0.41	-0.16	1.02	-0.66	-0.94	-0.73	0.14
RP0966	2.34	2.72	3.04	1.49	1.63	1.94	1.53	1.48	1.64	1.34	1.57	1.59	1.77	1.78	1.82	1.05	1.49	1.24	0.82	1.37	1.12	0.3	0.94	0.72	-0.92	0.2	-1	-0.99	-0.88	1.02	0.82	0.8	0.75	0.56	0.82	1.39	0.54	0.94	0.44	0.31	0.69	1.16	-0.3	0.77	0.84	-1	-0.01	1.28	1.05
RP0967	1.52	1.4	0.33	1.2	1.39	1.27	1.16	0.37	0.73	1	0.73	0.84	0.92	0.81	0.87	1.09	1.19	1.36	1.56	0.63	1.19	0.3	0.25	0.53	-0.92	0.56	-1	-0.98	-1.04	0.64	0.16	0.03	0.34	0.03	0.08	0.68	-0.68	-0.13	0.28	-0.49	-0.62	0.7	0.41	1.55	1.66	1.37	1.44	0.89	0.14
RP0968	0.5	1.49	0.16	0.68	1.4	0.82	0.39	1.25	0.82	1.03	1.26	1.35	-0.67	1.68	0.09	0.2	1.38	0.98	1.06	1.15	0.7	-0.32	0.72	0.39	1	-0.37	1	1	-0.57	-0.65	0.81	0.74	1.05	1	0.11	1.02	0.93	0.65	1.34	1	0.02	0.63	0.47	-0.07	1.19	0.93	-0.75	0.01	0.98
RP0969	0.43	2.64	1.67	1.1	2.3	1.4	0.96	1.4	1.32	0.84	0.64	0.67	0.79	2.33	2.47	0.81	1.35	1.01	1.24	0.15	0.5	-0.18	0.18	0.13	-0.82	0.41	-1	-1	-0.99	0.97	-0.03	-0.03	0.03	0.27	-0.65	0.12	-0.12	0.19	-0.26	-0.56	-0.49	0.44	0.04	1.08	1.2	-0.4	0.95	0.93	0.25
RP0970	1.57	1.84	1.43	1.16	1.71	1.57	2.33	1.05	1.32	1.93	0.86	1.32	2.19	1.46	1.23	1.71	0.97	1.18	1.82	1.41	1.27	1.03	0.75	0.96	1	1.12	1	1	-0.29	1.02	0.83	0.97	0.94	1	0.25	1.5	0.91	1.27	1.13	1	0.2	1.25	1.06	1.64	1.4	0.99	1.22	1.25	0.89
RP0971	1.24	0.53	1.01	1.44	0.39	0.53	-0.21	1.05	-0.1	0.1	0.19	-0.14	-0.17	1.29	0.43	0.82	0.79	0.23	0.59	-0.33	0.26	-0.18	-0.5	-0.14	-1	-0.91	-0.27	-0.92	-1.04	-0.73	-0.94	-0.69	-0.16	-0.13	-1.13	-0.97	-0.72	-0.59	0.08	-0.47	-1.36	-0.74	-0.11	-0.49	1.3	-0.12	0.24	0.21	-0.52
RP0972	1.45	-0.68	-0.36	1.44	-0.71	0.58	0.46	0.36	0.46	0.9	0.71	0.93	0.16	-0.23	0.15	0.64	0.03	0.35	0.76	0.85	0.32	1.01	0.91	1.15	0.99	-0.8	1	1	-0.95	-0.97	1.09	0.4	0.9	1	0.97	-0.63	1.02	-0.63	1.08	1	0.81	-0.84	1.04	-0.01	1.44	0.94	1.25	0.39	0.91
RP0973	1.34	2.6	1.7	0.93	1.82	1.69	-1.39	0.19	-0.47	-0.69	0.07	-0.32	-0.48	1.32	0.48	-0.39	0.66	0.69	1.08	-0.95	-0.42	0.97	0.72	0.87	-0.95	1.43	-1	-0.96	-0.14	1.02	0.07	-0.58	-1.18	-1.08	0.18	0.99	-0.55	-0.18	-1.25	-1.09	0.15	1.25	-0.09	1.47	0.99	0.16	1.17	1.21	0.29
RP0974	0.52	0.24	0.25	-0.01	-0.7	-0.48	0.71	0.51	0.77	0.73	0.43	0.74	0.68	-0.19	0.27	0.09	-0.3	-0.15	-0.18	0.11	-0.96	0.97	1.47	1.36	0.96	-0.95	1	1	-0.7	-0.99	0.94	0.17	-0.42	1	0.95	-0.9	0.8	-0.89	-0.28	1	0.79	-0.61	1.05	-0.15	1.56	0.91	0.85	0.56	0.98
RP0975	1.68	0.95	0.34	0.1	0.8	0.39	0.07	0.6	0.67	0.71	0.72	0.73	1.06	1.16	0.57	0.7	1.14	0.91	1.27	0.23	1.08	0.93	0.67	0.86	-0.89	0.24	-1	-1	-0.97	0.95	0.34	0.29	-0.34	-0.01	-0.07	0.89	-0.02	0.86	-0.2	-0.42	-0.17	1.08	0.25	0.47	1.06	-0.53	1.09	1.24	0.62
RP0976	2.27	2.25	1.18	0.32	1.73	0.25	1.97	1.64	1.47	1.29	1.23	1.08	2.26	2.04	1.59	1.52	1.57	1.14	1.99	0.93	1.13	0.92	0.31	0.53	0.99	0.32	1	1	-0.74	0.14	0.51	0.12	0.16	1	-0.33	0.48	0.78	0.51	0.98	1	-0.17	0.81	0.93	0.52	1.64	0.93	1.05	0.87	0.66
RP0977	0.35	-0.02	-0.29	0.35	-0.05	-0.13	0.61	1	1.18	0.44	0.74	1.04	-0.55	0.05	0.18	-0.8	-0.17	0.04	1.15	1.02	0.36	1.21	0.82	1.47	0.6	0.8	1	1	1	-1.08	1.17	0.85	1	1	1	-0.5	0.98	-0.14	1.13	1	1	-0.85	0.6	1.07	0.87	0.97	1.44	0.43	0.73
RP0978	1.18	-0.26	0.22	0.44	-0.79	0.03	0.21	-1.49	-1.35	0.27	-1.12	-0.62	0.47	-0.87	-0.39	0.36	-1	-0.41	0.77	-0.5	-0.44	0.67	-0.2	0.59	1	0.14	1	1	0.68	-1.02	0.72	0.76	0.22	1	0.14	-0.32	0.84	-0.35	0.84	1	0.24	-0.73	0.53	0.9	1.76	0.58	1.74	0	0.05
RP0979	2.65	2.5	3.05	2.12	1.7	2.3	0.9	0.87	0.83	0.84	0.66	0.7	3.18	1.52	2.43	1.84	1.31	1.38	2.77	0.31	1.2	0.52	0.79	0.82	-0.82	0.17	-1	-0.99	-1	0.85	0.77	0.07	0.18	0.7	0.34	0.2	0.4	0.23	0.72	0.34	-0.38	0.86	0.94	2.68	1.49	0.28	1.88	1.14	0.75
RP0980	1.64	1.26	0.32	1.24	0.78	0.72	1.27	0.95	1.12	0.9	1.09	1.16	1.19	1.14	0.82	0.79	1	0.91	1.93	1.05	0.99	0.93	1.01	0.93	1.01	0.4	1	1	-0.52	0.26	0.99	0.97	1.05	1	1	0.78	1.05	0.42	1.18	1	1.15	0.44	0.93	1.27	1.64	0.94	0.72	0.91	1.18
RP0981	0.75	1.34	0.4	1.52	1.83	1.52	2.12	2.07	1.96	2.1	1.9	2.04	1.55	1.9	1.51	1.47	1.73	1.6	1.63	1.35	1.19	0.61	0.81	0.84	0.99	1.04	1	1	-0.63	0.88	0.85	0.93	1.2	1	0.68	0.8	1.04	0.55	1.04	1	0.82	0.39	0.43	0.97	1.56	0.5	0.35	0.99	1.04
RP0982	2.71	2.28	1.61	1.66	2.84	2.09	1.34	1.96	1.78	1	1.94	1.68	2.02	2.05	2.06	1.6	2.09	1.87	1.84	1.75	1.44	0.09	0.7	0.42	1	1.02	1	1	-0.81	1.01	0.93	0.84	1.19	1	0.61	1.41	0.99	1.77	1.66	1	0.53	1.21	0.68	1.82	1.22	0.96	-0.35	1.28	0.98
RP0983	0.15	0.65	-0.73	0.41	0.81	0.26	0.05	-0.35	-0.7	-0.49	-0.15	-0.32	1.12	0.09	-0.21	0.06	0.02	-0.13	0.26	-1.48	-1.28	-0.9	-1.17	-0.98	-0.73	-0.59	-1	-1	-1.07	-0.66	-0.95	-0.3	-1.55	-1.02	-0.89	-1.05	-0.32	-0.73	-1.17	-0.68	-0.44	-1.15	-0.62	-0.12	1.11	-0.67	-0.16	-0.31	-1.09
RP0984	1.31	1.85	1.25	0.36	1.09	0.86	1.9	2.01	2.12	2.01	1.85	2.15	1.93	1.93	1.95	1.84	1.54	1.64	1.66	1.95	1.32	0.28	0.79	0.74	1.04	0.45	1	1	1	-0.93	1.03	0.68	-0.35	1	1	-0.93	0.96	-0.49	0.35	1	1	-0.63	0.47	1.37	0.6	1.02	1.82	0.01	1.18
RP0985	0.54	1.92	2.28	0.68	2.49	2.57	1.65	1.12	1.35	1.09	1.27	1.51	1.88	1.94	1.89	0.98	2.19	2.06	1.81	0.94	1.56	0.97	0.84	0.99	0.94	1.1	1	1	-0.54	1.05	0.84	0.69	0.37	1	0.42	1.03	0.84	1.16	1.1	1	0.16	1.41	0.75	1.35	1.49	0.86	1.37	1.18	0.81
RP0986	1.24	0.23	0.37	0.87	-0.5	0.43	0.86	-0.44	0.32	0.42	-0.64	-0.13	1.24	-0.34	0.59	0.87	-0.5	0.07	0.18	-1.32	-1.26	1.19	0.93	1.07	0.9	-0.36	1	1	0.61	-1.01	0.65	0.37	-1.27	1	0.3	-0.95	0.51	-0.68	-0.27	1	0.79	-0.69	0.73	-0.6	1.53	1.01	1.37	0.44	0.56
RP0987	0.93	1.74	1.16	0.13	0.87	0.63	1.49	1.94	1.88	1.17	1.35	1.49	0.95	1.75	1.47	0.61	1.01	1.06	1.67	1.64	1.34	0.97	1.31	1.19	1.01	0.7	1	1	1	-0.71	1.17	1.09	1	1	1	0.63	1.02	0.15	0.87	1	1	0.27	0.98	1.56	1.07	0.99	1.91	0.87	1.13
RP0988	2.75	2.88	3.53	1.96	3.26	3.08	1.99	2.07	2.35	1.28	1.73	1.63	2.28	2	2.64	1.54	1.92	1.88	1.87	1.44	1.12	0.98	0.96	0.99	1	1.04	1	1	-0.42	1.04	0.94	0.67	0.9	1	0.51	1.29	0.93	1.28	1.32	1	0.11	1.09	1.01	1.82	1.67	1.01	0.65	1.19	1.06
RP0989	2.49	3.86	3.66	1.2	3.4	2.59	1.04	2.03	1.54	0.98	1.49	1.26	1.87	2.45	2.33	1.06	2.24	1.85	2.48	0.85	1.11	0.4	0.8	0.85	0.95	1.01	1	1	-1	0.7	0.96	0.77	0.77	1	0.77	0.39	0.9	1.61	1.36	1	-0.09	0.69	1.05	1.58	1.36	0.92	1.1	1.14	0.9
RP0990	2.69	2.07	2.24	1.18	1.59	1.09	2.02	1.12	1.13	0.54	0.78	0.72	2.81	1.36	1.8	0.94	1.16	0.98	1.82	0.91	0.97	0.79	0.27	0.72	0.93	0.67	1	1	0.45	-0.87	0.54	1.28	1.14	1	0.59	0.24	0.97	1.25	1.16	1	0.35	0.11	0.74	1.13	1.44	0.76	2.01	0.39	0.61
RP0991	2.08	2.58	1.3	0.6	3.02	1.48	0.51	1.25	0.83	0.68	1.49	1.2	0.1	1.55	1	0.25	1.63	0.98	2.05	1.24	0.96	1.03	1.18	1.08	1	1.02	1	1	-0.75	1.04	1.1	0.78	0.98	1	1.14	0.5	1.01	0.18	0.78	1	1.11	0.53	1.03	1.85	1.55	1.01	1.06	1.23	1.13
RP0992	1.68	1.93	1.24	0.67	1.03	0.49	1.17	1.4	1.32	1.44	1.19	1.45	1.27	1.8	1.53	1.51	1.33	1.37	2.27	0.97	1.22	1.06	1.19	1.23	1	1.15	1	1	-0.19	0.95	1.04	0.71	0.48	1	1.03	0.16	1.02	0.84	1.03	1	0.87	0.98	1.26	2.24	1.4	0.98	1.11	1.25	1.05
RP0993	0.83	2.27	1.31	-0.69	2.2	1.07	0.38	1.56	1.21	0.46	1.12	1.09	0.56	1.74	1.25	0.64	1.26	0.96	1.35	0.88	0.64	1	0.95	1.02	1	-0.2	1	1	-0.57	-0.43	0.84	0.49	1.01	1	0.15	0.78	0.89	0.23	1.27	1	0.07	0.47	1.33	0.85	1.32	1.01	0.97	0.71	1.08
RP0994	0.91	-0.49	-0.04	-0.39	-0.66	-0.19	0.58	-1.28	-1.2	-0.45	-1.47	-1.54	1.45	-0.37	-0.17	0.46	-1.03	-0.81	-0.11	-0.84	-0.84	-1.64	-1.61	-1.2	-0.83	-1.22	-1	-1	-1	-1.1	-2.14	-1.61	-1.35	-1.07	-1.5	-1.48	-1.3	-1.37	-0.37	-0.69	-1.79	-1.42	-1.86	-0.9	0.98	-1.52	-1.11	-2.41	-1.9
RP0995	1.12	0.09	-0.1	0.49	0.52	0.46	0.99	0.76	0.86	0.96	0.84	1.07	1.24	1.02	0.97	1.29	1	1.01	1.32	0.96	1	1.01	1.41	1.24	1.03	-0.01	1	1	1	-0.99	1.07	0.64	-0.12	1	1	-1.12	0.92	-0.49	0.35	1	1	-0.77	1.02	1.19	1.06	1.02	1.92	0.7	0.98
RP0996	1.89	2.11	1.94	1.22	1.3	1.5	0.93	0.12	0.41	0.75	0.14	0.12	1.93	1.46	1.42	1.42	0.61	0.52	0.29	-0.45	-0.36	0.86	0.24	0.58	-1.05	-0.59	-1	-1	-0.86	-0.15	-0.46	-0.35	-0.45	-0.31	-0.89	-0.27	0.04	-0.6	0.32	-0.19	-0.15	-0.64	0.11	0.35	1.2	-0.2	0.67	0.73	0.1
RP0997	1.1	2.05	1.63	1.58	1.26	0.82	0.95	0.62	0.5	0.35	0.36	-0.03	0.8	0.95	0.5	0.09	0.29	-0.28	-0.13	-0.65	-0.9	-0.13	-0.02	0.03	-0.82	-1.24	-1	-1	-0.98	-0.94	-0.11	-0.29	-0.44	-0.22	-0.58	-0.31	0.21	-0.75	-0.41	-0.14	0.13	-0.91	-0.23	-0.44	1.01	-0.53	0.92	-0.06	0.06
RP0998	1.07	0.12	0.66	0.73	-0.04	0.61	1.57	0.51	1.15	1.5	0.54	1.11	1.6	0.51	1.27	1.72	0.4	0.78	0.46	0.57	-0.02	1.03	1.18	1.12	0.99	-0.03	1	1	1.16	-1	1.06	0.68	0.16	1	1.23	-0.88	0.92	-0.54	-0.49	1	1.08	-0.77	0.96	0.06	1.4	0.99	1.53	0.45	0.96
RP0999	-0.04	-0.44	-0.47	-0.2	-1.63	-0.91	-1.28	-1.26	-1.18	-1.43	-2.3	-1.34	-1.02	-0.8	-0.57	-0.61	-2.15	-1.04	-0.67	-2.05	-1.44	0.62	-0.61	0.64	0.57	0.41	-0.99	1	1	-1.3	0.3	1.28	0.6	1	1	-2.04	0.36	0.38	-0.16	1	1	-2.27	0.14	0.68	-0.5	0.51	0.86	-1.41	-0.7
RP1000	2.12	2.71	2.2	2	1.93	2.16	2.07	1.19	1.12	1.61	1.09	1.32	2.05	1.55	1.41	1.71	1.31	1.49	2.48	1.66	1.48	0.77	1.51	1.2	1.02	1.73	1	1	1	1.05	1.16	1.3	1.21	1	1	1.8	1.02	0.93	1.11	1	1	1.3	0.7	2.41	1.11	0.74	0.95	0.84	1.29
RP1001	1.46	1.19	1.46	1.68	0.88	0.02	1.21	0.54	1.24	1.52	1.05	1.21	1.12	0.57	1.12	1.24	0.85	0.63	1.52	1.4	1.3	0.12	0.47	0.47	0.99	0.31	1	1	-0.77	-0.07	0.52	0.67	1.16	1	-0.05	0.62	0.93	1.12	1.17	1	0.13	0.69	0.68	1.07	1.27	0.81	-0.15	0.49	0.79
RP1002	0.66	1.26	1.05	0.39	0.26	0.06	-0.9	-0.88	-1.61	-0.99	-1.6	-1.64	-0.53	-0.09	-0.53	-0.85	-1.26	-1.34	-0.16	-1.15	-1.33	-0.55	-0.86	-0.28	-0.81	-1.21	-1	-1	-0.76	-1.14	-1.19	-0.82	-0.88	-0.22	-1.31	-1.46	-0.33	-1.15	-0.79	-0.13	-0.96	-1.58	-0.86	-0.5	0.79	-0.95	-0.75	-1.12	-1.02
RP1003	1.53	1.62	0.67	0.71	0.89	0.51	-0.86	0.75	-0.56	-1.01	0.27	-0.72	-0.59	1.17	-0.21	-0.91	0.61	-0.35	1.01	-0.66	-0.55	1.14	0.88	1.02	-0.91	0.36	-1	-1	-0.59	1.02	0.24	-0.01	-0.96	-0.3	0.18	0.07	0.11	-0.62	-1.04	-0.09	0.64	-0.1	0.71	1.32	1.65	0.4	1.25	1.25	0.31
RP1004	1.52	0.31	0.57	0.87	-0.39	-0.06	0.41	-1.16	-0.49	-0.59	-0.95	-0.98	1.47	-0.74	0.09	0.46	-0.69	-0.5	0.84	-0.81	-0.01	-0.38	-0.35	-0.38	-0.95	0.37	-1	-0.99	-1.03	0.86	-0.6	-0.61	-1.19	-0.87	-0.72	-0.19	-0.53	-0.6	-0.97	-0.83	-0.58	0.16	-0.27	0.67	1.07	-0.67	1.04	0.86	-0.47
RP1005	2.14	2.15	2.61	1.44	3.12	2.51	1.65	1.8	1.96	1.13	1.44	1.35	2.04	1.89	2.31	1.48	1.88	1.65	1.78	1.09	1.25	0.19	0.72	0.53	-0.81	0.88	-1	-1	-1.01	0.91	0.76	0.39	0.78	0.81	0.26	0.94	0.55	0.93	0.86	0.44	-0.27	0.87	0.41	1.66	1.2	-0.08	1.18	1.07	0.82
RP1006	0.84	1.18	1.61	0.65	1.31	1.13	1.38	1.18	1.1	0.97	0.92	0.99	2.04	1.63	1.26	1.35	1.31	1.27	1.43	0.6	1.43	0.28	0.16	0.17	-0.79	0.8	-1	-1	-1.05	0.64	0.09	0.04	0.3	0.77	-0.82	0.43	0.33	1.19	0.76	0.44	-0.7	0.77	0.71	1.34	1.44	-0.05	1.25	1.06	0.28
RP1007	1.95	0.55	0.05	-0.7	0.43	-0.81	2	1.6	0.99	0.98	1.06	0.94	1.89	1.63	0.86	0.61	0.95	0.55	1.29	0.73	0.33	0.75	0.26	0.59	0.93	0.14	-0.33	1	-0.95	-0.33	-0.17	-0.38	0.03	1	-1.05	0.25	0.49	-0.47	-0.5	1	-0.41	-0.23	0.58	0.89	1.06	0.7	1.07	-0.05	0.14
RP1008	2.71	1.97	2.25	1.48	1.08	1.23	3.29	0.67	2.04	2.57	1.35	2.14	2.53	0.68	1.54	1.72	1.17	1.52	1.54	0.94	0.86	0.88	0.36	0.74	0.99	-0.15	1.02	1	-0.53	-0.69	0.53	0.71	1.17	1	0.19	0.21	1	0.43	0.83	1	0.46	-0.22	0.95	0.67	1.45	0.87	1.45	1.14	0.67
RP1009	1.71	0.65	0.73	1.06	0.58	0.35	0.58	-0.28	0.09	0.34	-0.42	0.01	0.53	0.14	0.24	0.58	0.27	0.41	1.1	-0.61	0.19	0.99	1.09	0.85	-1.03	0.64	-1	-0.96	-0.94	1	0.18	-1.67	-1.15	-0.95	-0.02	0.85	-0.1	-1.55	-1.14	-0.18	0.8	0.57	-0.5	1.33	0.93	-0.01	1.01	1.04	0.45
RP1010	2.05	2.77	1.72	1.08	1.37	1.22	1.64	1.38	1.34	1.43	1.26	1.31	2.34	1.87	1.78	1.74	1.39	1.51	1.1	0.97	0.99	1.02	0.64	1	0.97	-0.1	1	1	-0.99	-0.58	0.86	0.55	1.15	1	0.57	0.27	0.85	0.38	1.33	1	-0.17	-0.01	1.2	0.68	1.43	0.96	1.26	0.71	0.83
RP1011	3.13	2.42	3.07	3.02	1.61	2.43	3.13	1.17	1.97	2.45	1.06	1.93	2.81	1.66	2.52	2.65	0.98	2.04	1.9	0.6	0.43	0.45	0.48	0.65	0.98	0.78	1	1	0.56	-0.72	1.05	1.02	1.05	1	1.05	-0.57	1.04	-0.13	0.54	1	0.87	-0.92	0.5	0.31	1.44	0.72	1.78	-0.07	0.71
RP1012	0.66	1.01	1.4	-0.9	0.82	0.38	0.58	0.51	0.62	0.21	0.29	0.36	0.16	0.69	0.87	-0.54	0.54	0.19	0.23	-0.41	-0.7	0.3	0.98	0.84	-0.94	-1.02	-1	-1	-0.94	-0.31	0.72	0.14	-0.76	0.65	0.69	-0.78	0.27	-0.64	-0.31	0.25	0.18	0	0.07	0.35	1.34	-0.05	0.92	0.14	0.6
RP1013	2.52	1.69	2.01	1.83	2	1.76	1.88	0.67	1.07	1.27	0.86	0.87	2.04	0.93	1.47	1.89	1.22	1.29	1.13	0.65	1.29	-0.09	0.32	0.48	-0.8	0.14	-1	-1	-1.02	-0.07	0.27	0.27	0.37	0.69	-0.38	0.27	0.22	0.59	0.38	0.19	-0.57	0.59	0.27	1.25	1.22	-0.08	1.04	0.23	0.46
RP1014	0.26	1.35	0.73	0.07	1.12	-0.05	1.08	1.96	1.73	0.99	1.48	1.16	1.5	2.11	1.7	1.1	1.82	1.09	2.02	1.35	1.39	1.03	0.84	1.05	1	1.1	1	1	-0.32	0.99	0.89	1.1	1.01	1	0.81	1.13	1	1.71	0.98	1	0.41	1.05	1.15	1.73	1.87	1.01	1.08	1.27	1.04
RP1015	0.02	0.77	-0.38	-0.47	0.64	-0.08	0.78	1.41	1.07	0.98	1.38	1.46	0.42	1.16	0.36	0.48	1.09	0.71	1.54	1.37	1.2	0.94	1.53	1.25	1.04	0.29	1	1	1	-1	1.12	0.79	0.49	1	1	-0.57	1.01	-0.38	0.68	1	1	-0.41	0.93	1.36	1.08	0.97	1.91	0.61	1.14
RP1016	2.62	1.51	1.68	1.64	1.85	2.15	1.41	1.25	1.46	1.05	1.45	1.53	0.88	1.42	1.36	0.56	1.38	1.42	1.94	1.51	1.34	1.02	1.19	1.15	1	1.63	1	1	1.18	1	1.13	1.24	1.24	1	1.18	1.32	1.04	1.03	1.11	1	1.09	1.04	1.03	1.9	1.41	0.97	1.55	1.26	1.17
RP1017	2.31	1.78	1.73	1.72	2.41	1.97	1.47	0.57	0.71	0.54	0.2	0.06	2.17	1.09	0.65	0.86	0.53	0.22	1.62	0.18	0.35	-0.83	0.23	-0.08	-1.17	-0.35	1	-0.81	-0.64	0.06	0.3	0.26	0.48	0.69	-0.32	0.26	0.23	0.21	1.03	0.46	-0.26	0.29	-0.97	0.17	1.19	0.01	-1.07	0.01	0.33
RP1018	-0.32	0.96	0.2	1.63	0.82	0.76	1.17	1.06	0.87	1.21	0.95	1.22	0.48	0.91	0.24	1.29	0.94	0.91	1.81	1.21	1.33	0.2	0.7	0.62	1	1	1	1	-0.64	0.98	0.8	0.85	0.65	1	0.14	1.26	0.97	1.62	1.17	1	0.29	1.05	0.69	1.65	1.25	0.9	-0.18	1.02	0.93
RP1019	1.2	0.26	0.66	0.96	-0.16	0.65	1.23	0.19	0.5	1.44	0.46	1.02	1.45	-0.06	0.38	1.5	0.23	0.54	1.27	1.07	0.87	1.03	0.82	0.84	-0.95	0.26	-1	-1	-0.91	0.99	0.55	0.69	0.32	0.34	0.01	1.48	0.67	0.64	0.22	0.5	0.84	0.98	0.28	0.68	1.31	-0.11	1.11	1.27	0.87
RP1020	2.92	1.79	1.19	1.94	1.58	1.84	1.85	1.15	1.55	1.19	1.12	1.08	2.56	1.23	1.69	1.79	1.33	1.64	1.6	1.16	1.22	1.03	0.78	1.01	0.99	1.05	1	1	-0.95	0.82	0.95	0.92	1.17	1	0.87	0.82	0.98	1.72	1.39	1	0.35	0.83	1.28	1.2	1.55	1.01	1.14	1.3	0.97
RP1021	0.22	-0.58	-0.27	0.08	-0.9	-0.31	-0.28	-1.84	-1.31	-0.87	-2.19	-1.93	0.4	-1.22	-0.57	-0.27	-1.59	-1.12	0.24	-1.93	-1.6	-1.15	-2.52	-1.99	-1.24	-1.64	-1	-1	-1.07	-1.17	-1.62	-0.89	-0.77	-1.35	-0.9	-1.9	-0.74	-1.28	0.56	-0.71	-0.71	-2.08	-0.94	-0.08	1.18	-1.19	1.93	-1.39	-2.29
RP1022	1.12	1.15	1.42	-0.24	0.46	-0.05	1.53	0.62	1.27	0.62	0.68	0.69	1.03	0.32	0.8	0.2	0.48	0.27	1.22	0.54	0.33	0.91	0.41	0.67	1	-0.02	1	1	-0.34	-0.55	0.21	0.53	0.5	1	-0.87	0.31	0.91	0.34	0.36	1	0.08	-0.15	0.98	0.92	1.5	0.91	1.17	0.98	0.71
RP1023	1.12	1.83	1.02	0.67	0.88	0.8	1.12	1.27	1.06	1.12	0.62	0.85	-0.02	1.3	0.95	0.79	0.48	0.63	1.12	0	-0.33	0.29	0.74	0.57	1	-0.36	1	1	-0.23	-0.69	0.98	0.33	0.16	1	0.58	-0.13	0.96	-0.51	-0.37	1	1.1	-0.48	0.68	0.52	1.5	1.02	0.96	-0.02	0.88
RP1024	2	0.06	0.81	1.47	-0.48	0.74	2.63	0.54	1.91	1.8	0.2	1.21	2.64	0.76	1.8	2.1	0.14	0.99	0.73	0.05	0.21	-0.63	-0.1	-0.14	-1.05	0.12	-1.01	-1	-0.71	0.13	0	0.81	-0.64	-0.55	0.56	0.73	0.08	1.28	-0.92	-0.38	0.68	0.5	-0.73	0.69	1.04	-0.79	0.85	0.16	0.01
RP1025	0.95	0.58	0.78	-0.46	0.34	0.47	0.83	-0.6	0.32	-0.38	-0.25	-0.08	0.39	-0.6	0.55	-0.35	-0.63	-0.34	0.97	-0.81	-1.25	0.94	0.44	0.8	0.98	-0.29	-1.16	1	0.62	-1.01	0.75	0.62	0.7	1	0.2	-0.87	1	-0.5	0.56	1	0.51	-1.38	0.89	0.58	-0.08	0.95	1.48	-0.38	0.74
RP1026	1.75	1.1	1	1	0.63	1.08	0.85	1.81	1.13	-0.45	0.34	-0.05	0.67	1.57	1.54	-0.77	0.49	0.12	1.46	-0.04	-0.33	-0.67	-0.42	-1.51	-0.69	0.36	-1	-0.96	-1.02	0.7	0.2	-0.33	-0.54	-0.18	0.01	0.37	-0.23	-0.93	-0.31	-0.35	-0.66	0.7	-0.38	1.38	1.28	-0.19	2.11	-0.39	-0.32
RP1027	1.41	2.1	1.01	1	1.84	1.1	0.7	1.18	1.04	0.16	1.04	0.86	0.3	1.27	0.65	-0.12	1.04	0.41	2.18	1.4	1.1	0.99	1.28	1.09	0.98	1.73	1	1	1	1.05	1.1	1.37	1.17	1	1	1.67	0.95	1.84	1.1	1	1	1.35	0.99	2.28	1.07	1	1.91	1.13	1.27
RP1028	1.93	1.27	1.11	0.86	1.3	0.86	0.05	0.9	0.63	0.01	0.8	0.6	1.1	1.24	0.92	0.63	0.86	0.49	1.82	1.23	1.21	0.95	0.99	0.97	1	1.24	1	1	0.22	0.97	0.99	1.25	1.19	1	1.18	1.12	1.03	2.01	1.31	1	0.8	1.06	1.02	1.79	1.3	0.97	1.29	1.23	1.15
RP1029	0.49	0	-0.09	0.57	-0.22	-0.17	0.39	-0.46	0.23	-0.08	-0.31	0.02	0.19	-1.18	-0.28	-0.1	-0.9	-0.45	0.88	-0.16	-0.09	-0.45	-0.12	-0.22	-0.83	0.22	-1	-1	-0.87	0.97	-0.14	-0.29	-1.12	-0.78	0.04	-0.24	-0.41	-0.27	-1.19	-0.82	-0.41	0.18	-0.14	0.99	1.08	-0.7	1.18	0.85	-0.37
RP1030	1.15	0.39	0.18	0.46	0.26	0.34	0.18	-0.21	0.21	-0.06	0.14	0.37	0.61	-0.16	-0.18	-0.57	0.06	0.11	0.36	-0.15	0.15	1.02	0.84	1.03	-0.92	-0.72	-1	-0.96	-0.47	-0.67	0.56	-0.58	-0.34	-0.32	0.6	0.29	0.18	-0.68	-0.21	-0.18	0.54	0.7	0.3	0.48	1.23	0.74	1.06	0.65	0.65
RP1031	1.85	0.33	0.8	0.26	-0.74	-0.38	-0.09	-0.71	-0.58	-1.1	-0.84	-0.9	1.11	0.03	0.26	0	0.04	0.38	-0.25	-1.45	-0.15	-0.97	-0.86	-0.92	-0.91	-0.41	-1	-1	-1.06	0.18	-1.24	-0.82	-1.78	-1.66	-0.74	-0.34	-1.59	-1.14	-1.34	-1.19	-1.04	0.26	-0.61	0.35	1.22	-0.96	-0.55	0.51	-1.34
RP1032	1.94	2.4	1.77	1.67	1.61	1.79	1.23	1.3	1.26	0.89	0.94	1.21	1.46	1.64	1.34	1.23	1.17	1.26	1.97	1.14	1.12	1	1.2	1.01	0.99	1.73	1	1	1	1.05	1.03	1.35	0.97	1	1	1.36	0.99	2.03	1.11	1	1	1.39	1.04	2.26	1.03	1.04	1	1.1	1.24
RP1033	0.94	0.08	0.76	0.96	-0.55	0.46	1.93	-0.02	0.97	1.39	-0.07	1.13	1.72	0.5	1.49	1.53	-0.19	0.94	-0.01	0.13	0.03	0.97	0.79	0.97	1.01	0.57	-0.97	1	1	-1.01	0.94	1.34	0.68	1	1	-0.08	0.93	0.76	0.38	1	1	-0.62	1.01	0.84	0.51	1	1	-0.91	0.89
RP1034	2.5	1.07	1.49	1.33	0.74	0.69	1.22	0.02	0.49	1.3	0.54	0.75	1.3	0.12	0.36	1.47	0.44	0.56	1.59	1.02	0.88	0.96	0.86	0.92	1	0.98	-0.13	1	0.77	0.02	0.94	1.25	1.09	1	1.11	0.95	1.04	1.13	0.54	1	1.04	0.66	0.97	1.64	1.47	0.99	1.44	0.29	1.07
RP1035	2.24	2.91	2.49	2.08	2.11	2.37	1.94	2.11	1.98	1.07	1.54	1.53	2.17	2.39	2.3	1.55	1.76	1.45	2.18	1.46	1.23	0.99	1.6	1.03	1.04	1.73	1	1	1	1	1.12	1.2	0.55	1	1	1.17	1.01	2.47	1	1	1	1.31	1	2.39	1.08	1.02	2.12	0.87	1.52
RP1036	1.64	1.51	1.48	0.81	0.35	0.88	2.17	1.66	2.38	0.92	0.93	1.48	1.88	1.82	2.22	1.1	1.02	1.28	0.8	1.17	1.04	1	1.17	1.01	1.01	0.91	-0.37	1	1	-0.75	1.03	1.37	1.23	1	1	1.47	0.95	1.44	0.87	1	1	1.01	1.05	1.8	1.23	1.04	1	0.18	1.21
RP1037	0.6	0.27	-0.02	0.13	-0.2	-0.1	0.91	0.87	1.05	0.97	0.84	1.34	0.83	0.93	0.95	0.97	0.78	0.94	0.6	0.68	0.39	0.86	1.8	1.19	0.68	-0.14	-0.84	1	1	-1	0.95	0.6	-0.65	1	1	-1	0.77	-0.45	-1	1	1	-1	0.31	1.16	0.68	0.88	1.91	-0.22	1.07
RP1038	2.02	2.59	2.36	0.81	1.18	1.87	2.78	1.17	1.99	1.84	0.92	1.48	2.11	1.67	2.32	2	1.4	1.9	0.9	0.62	1.17	0.17	0.22	0.31	-0.95	-1.28	-1	-0.99	-0.99	-0.32	-0.06	-0.53	0.58	0.57	-0.8	0.08	-0.24	-0.55	0.73	0.03	-0.89	0.25	0.52	0.45	1.3	-0.17	1.32	0.55	0.24
RP1039	1.43	2.17	1.02	0.61	1.5	0.74	0.75	1.21	1.12	0.71	0.79	0.78	1.02	1.3	0.99	0.01	0.58	0.26	0.67	0.65	0.38	-0.1	0.31	0.25	-0.77	-0.34	-1	-1	-1.02	0.03	0.72	0.44	0.47	0.53	0.64	-0.05	0.07	0.09	-0.1	-0.32	-0.08	0.17	0.14	0.51	1.48	-0.36	0.41	0.55	0.56
RP1040	1.52	1.66	1.49	1.4	1.84	2.39	1.24	0.63	1.06	1.39	0.85	1.24	1.57	1.65	2.16	2.37	1.72	2.31	1.48	0.5	1.57	-0.15	0.36	0.45	-1.18	0.64	-1	-1	-1.02	0.87	0.11	0.04	0.03	0.39	-0.52	0.53	-0.04	1.22	0.88	-0.09	-0.74	0.92	-0.22	1.33	1.02	-0.4	0.3	0.93	0.29
RP1041	1.39	1.49	0.68	0.86	0.82	0.52	1.5	1.01	1.14	0.86	0.94	0.87	1.68	0.02	0.46	0.55	-0.07	-0.22	0.1	0.78	-0.1	0.67	-0.27	-0.22	-1	-1.33	-1	-1	-1.05	-1.67	0.38	-0.26	-0.21	0.05	0.26	-0.81	-0.23	-0.69	-0.8	-0.65	-0.33	-0.73	1	-0.58	1.9	0.36	1.68	-0.86	0.07
RP1042	1.31	1.01	0.54	0.58	0.14	0.65	1.09	-0.18	0.69	0.5	-0.15	0.1	0.48	0.77	1.07	0.64	0.42	0.68	0.4	-1.07	-0.51	1.1	0.79	1.25	-1.19	-0.56	-1	-0.99	0.76	-0.71	-0.01	-0.27	-1.41	-1.47	1.2	0.42	-0.58	-0.49	-1.49	-1.04	0.97	0.13	0.41	0.52	1.56	0.96	1.35	0.66	-0.02
RP1043	-0.03	1.85	1.84	1.95	1.44	1.61	-0.07	0.16	0.06	0.67	0.44	0.8	0.3	0.5	0.73	1.44	0.51	1.17	1.95	0.76	1.06	1.02	0.41	1.02	0.96	-0.08	0.99	1	-0.78	-0.92	0.73	0.76	1.14	1	0.5	-0.26	0.94	0.36	1.11	1	0.1	-0.4	1.15	-0.03	1.48	0.95	1.92	0.52	0.64
RP1044	1.23	0.1	0.03	0.16	-0.26	-0.58	1.71	0.13	0.57	1.44	0.01	0.65	1.53	0.62	0.77	1.65	0.21	0.75	0.68	0.04	0.51	-0.8	-0.39	-0.58	-0.93	0.2	-1	-0.99	-1.04	0.89	0.08	0.15	-0.42	-0.35	0.16	0.05	-0.38	0.17	-0.59	-0.64	-0.84	0.58	-0.52	0.24	0.97	-1.09	1.05	0.93	-0.22
RP1045	1.29	1.35	0.62	0.24	0.51	0.19	-0.76	0.52	0.55	-0.21	0.34	0.57	-0.88	0.85	0.64	-0.62	0.26	0.22	1.08	-0.13	0.05	0.91	0.31	0.8	1	0.17	1	1	0.74	-0.95	0.79	1.03	1.17	1	0.87	-0.26	1.03	0.12	1.06	1	0.83	-0.73	0.95	0.87	1.64	0.92	1.56	0.4	0.61
RP1046	2.27	1.76	1.75	2.52	1.94	2.2	2.21	1.59	1.91	1.55	1.1	1.42	2.23	1.95	2.14	2.22	1.51	1.81	1.45	0.77	1	0.28	0.38	0.44	1	-0.04	1.02	1	-0.49	-0.53	0.84	0.63	1.03	1	0.6	-0.1	0.95	0.47	1.07	1	0.21	0.02	0.91	0.64	1.37	0.98	1.08	0.34	0.68
RP1047	1.74	2.88	2.46	1.88	2.62	2.53	0.25	0.8	0.89	-0.01	0.76	0.48	1.04	2.3	2.23	1.21	1.54	1.38	1.88	0.75	0.99	1.03	0.78	1.05	1	1.37	1	1	0.41	0.97	1.02	1.12	1.16	1	1.19	0.58	1.05	1.04	1.26	1	0.95	0.57	1.16	1.89	1.89	1.01	1.33	2.16	0.95
RP1048	1.82	-0.18	2.11	1.31	0.31	1.68	1.15	0.47	1.12	0.47	0.47	0.77	1.64	0.37	1.87	1.31	0.64	1.05	1.43	0.73	1.05	0.02	0.24	0.36	0.83	0.29	1	1	-1.02	-0.49	0.81	0.83	1.09	1	0.67	0.19	1	1.02	1.05	1	0.29	0.17	0.44	0.92	1.37	0.57	0.02	0.3	0.59
RP1049	1.72	1.73	1.85	1.21	1.1	0.72	0.4	1.2	0.44	0.47	0.31	0.18	0.03	2.38	1.34	0.17	0.43	-0.51	-0.59	0.09	-0.33	-0.3	0.28	-0.02	-1.14	-1.23	-1	-1	-0.74	-0.68	0.6	0.61	0.27	0.31	0.69	0.09	-0.12	0.21	-0.37	-0.61	0.25	0.18	-0.12	-1.15	1.15	-0.4	0.87	-0.43	0.43
RP1050	1.52	2.46	1.97	0.96	1.84	1.68	1.51	1.46	1.55	1.33	1.38	1.43	2.1	2.06	2.39	1.1	1.96	1.94	1.77	1.07	1.06	-0.19	0.74	0.55	-1.13	-1	-1	-1	-1	0.78	0.76	0.56	0.59	0.64	0.5	0.99	-0.07	0.56	0.07	-0.39	-0.71	0.84	0.32	2.06	1.18	0.25	1.66	1.01	0.82
RP1051	1.64	2.06	1.78	1.41	1.33	1.51	1.71	1.1	1.04	1.33	0.78	0.95	1.57	1.87	2.02	0.98	1.39	1.29	1.81	0.57	0.79	-0.14	0.36	0.11	-1.02	-1	-1	-0.99	-1	0.86	0.47	0.37	0.32	0.21	0.42	0.6	-0.45	0.09	-0.12	-0.65	-0.66	0.63	0.39	2.17	1.22	0.33	1.72	0.99	0.42
RP1052	1.66	0.09	-0.32	0.69	0.22	0.4	1.88	0.6	1.26	1.17	0.8	1.07	2.52	0.72	1.11	1.81	1.11	1.36	0.9	0.86	1.15	0.8	0.54	0.87	0.96	-0.33	1	1	-0.98	-0.75	0.78	0.79	1.2	1	0.63	0.25	0.96	0.57	1.18	1	0.3	0.02	0.8	0.37	1.28	0.76	1.19	0.42	0.81
RP1053	1.55	3.41	3.48	1.44	3.74	2	-0.38	2.23	1.35	-0.84	0.63	-0.16	1.41	3.54	2.95	0.68	2.08	1.02	0.47	-0.06	0.7	-0.31	0.13	-0.08	-0.85	-0.12	-1	-1	-0.86	-0.23	0.45	0.78	0.06	0.68	0.04	0.01	0.36	1.2	0.68	0.2	-0.38	0.5	-0.24	-0.01	0.99	-0.5	0.93	0.53	0.46
RP1054	1.66	1.53	0.79	1.8	1.11	1	0.47	0.53	0.38	0.63	0.69	0.8	-0.23	0.52	-0.4	-0.33	0.49	-0.32	1.36	0.41	0.37	1.03	0.96	1.27	-0.93	1.25	-1	-0.96	-0.5	1	0.87	0.41	0.05	0.31	1.03	0.47	0.41	-0.01	-0.13	0.17	0.37	0.96	0.49	1.65	1.43	1.23	1.04	1.2	0.87
RP1055	1.6	3.16	2.45	0.51	1.41	0.29	0.49	1.66	1.09	-0.58	-0.13	-0.62	0.62	2.57	1.93	0.26	0.53	-0.04	-0.37	-1.18	-0.7	-0.81	-0.61	-0.73	-0.82	-1.35	-1	-1	-1.01	-0.95	-1.24	-0.68	-1.68	-1.23	-1.11	-0.84	-0.97	-0.82	-1.32	-1.17	-0.98	-0.75	-0.94	-0.55	0.66	-1.08	-0.83	-0.38	-0.69
RP1056	1.99	0.78	1.2	1.22	1.12	0.85	-0.04	0.16	-0.07	-0.19	0.14	-0.1	1.14	1.03	0.76	0.73	1.11	0.62	-0.23	-0.82	-0.05	-0.1	0.04	0.05	-0.98	-1.34	-1	-1	-1.02	-0.73	0.12	-0.03	-0.54	-0.04	0.16	-0.74	-0.74	-0.38	0.22	-0.72	-0.39	-0.15	0.43	-0.4	1.29	-0.34	1.06	-0.18	-0.17
RP1057	1.36	1.47	1.44	0.89	0.66	1.28	2.04	1.82	2.18	2.13	1.75	2.08	1.84	1.06	1.48	1.64	0.76	1.06	0.64	2	0.86	1.01	0.37	0.83	-1	-0.08	-1	-0.96	0.77	-0.62	0.87	0.32	-0.23	0.21	1.15	-0.3	0.47	-0.62	-0.62	0.28	1.12	0.06	-0.09	1.08	1.2	0.65	1.32	0.64	1.03
RP1058	1.79	2.27	1.96	1.28	1.38	0.97	0.66	0.13	0.36	0.36	-0.09	0.23	0.65	0.76	0.78	0.34	0.49	0.3	1.56	-0.24	0.59	0.83	0.63	0.82	-0.86	0.31	-1	-0.96	-1.01	0.73	0.4	-0.39	-0.5	0.15	-0.42	0.69	0.09	-0.25	0.08	-0.09	-0.44	1.03	0.42	1.55	1.2	0.75	1.27	1.18	0.56
RP1059	2.41	1.84	1.84	1.58	1.55	1.63	1.24	1.41	1.33	1.39	1.13	1.59	1.65	1.83	1.75	1.79	1.38	1.68	1.83	1.1	1.17	1	1.23	1.22	0.97	1.13	1	1	1	-0.11	1.14	0.86	0.12	1	1	-0.73	1.01	-0.16	0.02	1	1	-0.36	1	1.79	1.06	1.01	1.92	0.8	0.99
RP1060	-0.43	0.07	-0.02	-0.56	0	-0.26	-0.86	0.6	0.83	-1.33	0.31	-0.32	-0.65	0.02	0.31	-0.95	0.05	-0.57	0.2	-1.64	-1.43	-1.11	-1.39	-1.37	-0.82	-1.25	-1.14	-1	-0.91	-1.01	-1.82	-1.1	-1.66	-1.48	-1.31	-1.97	-1	-1.21	-0.54	-1.18	-0.97	-1.88	-1.23	-0.41	0.1	-0.95	-1.45	-1.28	-1.37
RP1061	2.91	1.49	1.09	1.12	1.34	1.34	1.36	1.21	1.12	0.98	1.19	1.18	2.11	1.74	1.69	1.18	1.51	1.27	2.58	0.92	1.2	1.02	1	1.12	1	1.02	1	1	-0.75	1.03	1.06	0.79	0.7	1	1.01	0.49	1.03	1.18	1.15	1	0.84	0.96	1.09	1.97	1.62	1.02	1.03	1.24	1.06
RP1062	1.66	3.29	1.95	1.34	2.82	1.71	1.75	2.46	2.35	1.43	1.78	1.62	0.9	2.75	2.35	1.83	2.2	1.83	1.33	1.16	0.91	0.2	0.73	0.54	1	-0.33	1	1	-0.52	-0.65	0.84	0.56	1.16	1	0.43	0.68	0.89	0.38	1.31	1	0.09	0.5	0.67	0.62	1.23	0.94	0.95	0.38	0.96
RP1063	0.18	1.21	0.78	1.49	1.89	1.8	0.46	0.61	0.6	0.38	0.58	0.7	-0.54	0.46	0.14	0.39	0.44	0.34	1.47	0.36	0.34	0.09	0.82	0.56	-0.86	0.57	-1	-1	-0.98	1	0.76	0.41	0.46	0.62	0.42	0.46	0.48	0.1	0.62	0.22	0.37	0.4	0.08	1.39	1.11	-0.3	0.87	1.62	0.83
RP1064	1.14	2.2	2.06	0.67	2.05	1.25	1.11	1.71	1.25	1.43	1.48	1.51	0.98	2.01	1.67	1.25	1.44	1.09	1.52	1.62	1.47	0.23	0.83	0.84	-0.79	0.72	-1	-1	-1.02	0.74	0.92	0.89	0.86	0.89	0.74	1.34	0.84	1.6	1.42	0.74	0.62	1.11	0.43	1.37	1.5	-0.14	1.31	1	0.98
RP1065	2.21	2.03	1.94	1.59	1.35	1.74	1.83	1.43	1.79	1.79	1.37	1.95	2.04	1.69	2.09	2.22	1.49	1.94	1.9	1.6	1.5	0.93	1.58	1.18	1.04	0.8	1	1	1	-0.61	1.12	0.95	0.49	1	1	0.06	0.98	-0.13	0.33	1	1	0.08	0.92	1.69	1.09	0.95	1.91	0.54	1.17
RP1066	0.36	0.88	0.88	0.12	-0.21	0.21	2.04	0.1	0.83	0.16	-0.06	0.49	1.71	1.11	1.62	0.51	0.18	0.74	0.48	0.07	0.17	0.87	0.54	0.91	0.91	0.53	-0.5	1	1	-1.1	0.92	1.22	1.05	1	1	-0.54	0.89	0.31	0.88	1	1	-0.88	0.87	0.55	0	0.86	1.73	-0.77	0.66
RP1067	1.66	2.44	1.58	1.18	1.6	1.15	-0.61	-0.1	-0.23	-0.45	-0.23	-0.29	-0.34	0.57	0.47	0	0.35	0.59	1.37	-0.4	0.37	-0.28	0.11	-0.02	-0.78	0.31	-1	-0.96	-1.02	0.43	0.07	-0.37	-0.44	-0.21	-0.33	0.14	-0.77	-0.72	-1.11	-1.09	-0.82	0.6	0.09	1.44	1.5	0.54	1.44	1.19	0.02
RP1068	1.43	0.54	0.16	0.56	0.41	0.31	0.31	-0.2	-0.05	-0.13	-0.57	-0.38	1.05	0.21	0.28	0.65	-0.32	-0.13	0.82	-1.77	-1.25	-1.22	-1.71	-1.46	-0.99	-1.14	-0.83	-1	-0.94	-1.1	-1.63	-0.76	-1.72	-1.17	-1.27	-1.87	-0.85	-0.95	-0.99	-0.97	-0.98	-1.79	-1.32	-1.25	-0.08	-0.96	-1.34	-0.87	-1.62
RP1069	1.88	1.56	2.05	1.61	2.5	3.13	1.54	2.07	2.44	1.36	2.03	1.94	2.17	1.99	2.86	2.15	2.38	2.61	1.91	0.88	1.18	-0.01	0.18	0.23	-1.13	0.63	0.53	-0.86	-0.91	0.82	0.34	0.6	0.76	0.66	0.1	0.41	0.32	0.84	0.77	0.39	-0.09	0.32	0.05	1.11	1.46	0.39	1.07	1	0.35
RP1070	1	2.8	1.41	0.69	1.72	1.53	1.83	0.77	1.19	1.35	0.66	0.86	1.95	1.54	1.9	1.67	1.07	1.24	0.99	0.02	0.43	0.21	0.27	0.1	-1.05	-0.47	-1	-1	-1.01	0.26	0.36	-0.12	-0.02	0.21	-0.08	0.11	-0.27	-0.31	-0.23	-0.59	-0.59	0.56	0.25	0.76	1.23	-0.29	1.07	0.71	0.36
RP1071	2.26	2.3	1.86	1.49	1.43	1.71	1.33	1.65	1.79	1.44	1.28	1.64	1.59	2.21	2.39	1.39	1.34	1.71	1.87	1.32	1.28	1.02	1.06	1.07	0.99	1.21	1	1	-0.94	0.93	1.09	0.92	1.24	1	1.1	1.03	1.05	0.71	1.16	1	1.17	0.86	1.04	1.86	1.43	0.95	1.27	1.26	1.13
RP1072	0.93	0.31	0.03	1.21	1.11	1.17	1.07	0.92	0.95	0.92	1	0.87	0.7	0.58	0.55	0.43	0.77	0.48	1.52	0.93	0.5	0.18	0.81	0.61	0.93	-0.12	1	1	-0.71	-0.31	0.79	0.36	0.7	1	0	1.11	0.83	-0.31	0.37	1	0.77	0.3	0.43	0.09	1.27	0.81	-0.12	0.1	0.85
RP1073	0.25	-0.53	-0.62	-0.85	-0.36	-1.47	-0.77	-0.87	-1.13	-0.13	-0.29	-0.03	-1.13	-0.63	-1.41	-1.04	-0.48	-1.04	-0.22	-0.03	-0.23	0.19	0.53	0.47	-0.97	-0.82	-1	-1	-0.14	-0.28	0.33	0.38	-0.13	-0.04	-0.35	0.93	0.46	-0.02	-0.07	0.18	0.63	0.27	-0.48	-0.88	0.98	-0.61	-0.16	0.33	0.6
RP1074	1.5	1.51	1.36	1.36	0.79	1.48	2.6	1.94	2.4	2.27	1.59	2.12	2.51	1.77	2.24	2.06	1.42	1.77	2.01	2.12	1.62	0.97	0.97	0.87	1	1.02	1	1	-0.81	1.01	0.83	0.82	1.11	1	0.14	1.76	1	0.97	0.93	1	0.89	1.28	1.04	1.85	1.29	1	1	1.22	1.13
RP1075	1.73	2.18	2.22	1.28	2.22	1.51	2.61	1.79	2.09	2.39	1.7	2.09	2.28	1.92	1.98	2.43	1.67	1.89	2.11	2.03	1.69	1.01	1.21	1.1	1	1.97	1	1	-1	1.03	1.07	0.81	1.09	1	0.92	1.7	1.01	1.63	1.24	1	0.84	1.48	1.13	2.96	1.33	1.02	1.76	1.22	1.19
RP1076	1.53	1.81	0.68	0.85	1.02	0.59	1.51	0.64	1.04	1.47	0.63	1.14	1.05	0.74	0.61	1.37	0.3	0.82	2.01	0.98	1.35	0.28	0.73	0.91	-0.84	0.89	-1	-1	-1	0.93	0.64	0.03	0.49	0.68	0.17	0.46	0.36	0.6	0.71	0.27	-0.38	0.73	0.34	1.83	1.26	-0.13	1.17	1.08	0.69
RP1077	1.36	1.44	1.26	0.98	1.24	1.37	1.01	0.4	0.36	0.14	-0.32	-0.34	1.65	0.9	0.96	0.61	0.34	0.45	1.69	-0.55	0.27	-0.27	-0.45	-0.76	-1.17	0.71	-1	-1	-0.99	0.69	-0.52	-0.15	-0.85	-0.53	-0.56	-0.31	-1.08	0.34	-0.99	-1.21	-0.92	0.38	0.37	1.5	1.36	-0.02	1.4	0.91	-0.58
RP1078	2.56	3.41	3.23	2.29	2.5	2.4	1.77	1.68	1.81	1.55	1.36	1.58	2.18	1.96	2.23	1.1	1.49	1.44	2.84	1.41	1.23	0.41	0.95	1.05	-1.09	1.25	-1	-1	-1	0.99	0.88	0.78	0.87	0.87	0.63	1.29	0.35	1.41	1	0.42	-0.55	1	0.04	2.77	1.16	-0.19	1.65	1.08	1.01
RP1079	2.94	0.84	1.57	1.62	0.64	1.2	2.75	1.05	1.79	2.09	1.23	1.84	3.14	1.2	2.09	2.26	1.23	1.72	1.88	0.78	0.75	1.03	0.85	0.97	0.97	1.2	1	1	-0.2	1.05	0.75	0.66	0.01	1	0.3	0.66	0.78	0.3	-0.3	1	0.56	0.51	1.15	1.72	1.39	1	1.27	1.22	0.77
RP1080	1.11	2.42	2.42	-0.61	1.32	0.67	1.16	0.65	0.66	0.96	0.86	0.89	1.03	1.03	1.14	0.52	0.62	0.57	1.53	0.82	0.57	0.35	0.52	0.46	1	0.25	1	1	0.18	-0.73	0.99	1.03	1.13	1	1.03	0.32	1.03	0.39	1.25	1	0.77	-0.19	0.92	0.81	1.44	1	1.14	0.37	0.8
RP1081	1.07	0.4	0.96	2.29	-0.11	1.71	1.82	0.65	1.51	1.34	0.76	1.23	1.59	0.44	1.08	1.59	0.3	1.04	1.77	1.41	1.17	0.26	0.86	0.67	0.97	1	1	1	-0.52	0.86	1.01	1.18	1.21	1	1.11	1.29	1.03	1.89	1.28	1	0.83	0.98	0.62	1.5	1.28	0.81	0.98	1.06	1.07
RP1082	1.17	1.06	1.09	0.07	0.1	0.02	0.71	0.38	-0.12	-0.12	-0.67	-0.82	1.72	0.74	0.98	0.28	-0.63	-0.79	-0.32	-1.18	-1.31	-0.44	-1.27	-0.94	-1.01	-1.72	-0.27	-0.93	-1.12	-1.5	-0.52	-0.08	-0.68	-0.26	-0.24	-2	-1.04	-1.12	-0.74	-0.53	-1.45	-1.84	-0.37	-1.09	1.7	-0.47	-0.65	-2.3	-1.39
RP1083	2.5	2.37	2.74	2.27	2.36	2.88	0.85	1.04	1.5	0.44	1.22	1.32	0.96	1.4	1.71	0.64	1.37	1.41	2.01	1.03	1.15	-0.04	0.9	0.65	1	1.58	1	1	1.08	1.03	1.03	1.32	1.24	1	1.16	0.98	1.01	1.46	1.12	1	1.1	1.04	0.45	1.82	1.24	0.85	1.39	0.9	1.06
RP1084	1.8	0.77	1.68	1.12	0.11	1.02	1.01	0.68	1.2	0.17	0.21	0.69	0.68	-0.23	0.44	-0.7	-0.96	-0.24	0.56	-0.23	-1.5	0.89	0.45	0.62	0.96	-0.72	-1.49	1	-0.08	-0.98	-0.08	-0.41	0.05	1	-1	-0.82	0.72	-0.79	-0.49	1	-0.49	-1.25	0.74	0.39	1.07	0.9	0.56	-0.15	0.6
RP1085	-0.32	0.27	0.75	-0.97	0.39	0.06	0.33	0.98	0.73	0.59	0.07	0.1	0.54	0.81	1.37	0.44	0.2	0.03	0.09	-0.23	-0.91	0.72	-0.05	0.44	0.97	-0.6	1	1	0.04	-0.99	-0.07	-0.06	0.97	1	-1.02	-0.9	0.7	-0.87	1.37	1	-0.39	-1.82	0.56	0.43	1.12	0.7	0.53	0.18	0.16
RP1086	0.51	1.28	0.38	0.13	1.6	0.25	1.21	0.85	1.11	1.15	0.62	0.77	2.14	1.72	2.71	2	1.49	1.66	1.23	0.63	1.49	-0.29	0.26	0.15	-1.02	0.24	-1	-1	-1.06	0.69	0.48	0.39	0.22	0.34	0.47	0.18	-0.2	0.94	0.08	-0.22	-0.46	0.91	0.37	0.93	1.39	-0.27	1.34	1.18	0.23
RP1087	0.82	1.51	0.89	-0.68	-0.12	-0.78	0.64	0.52	0.6	0.75	0.15	0.28	-0.03	0.37	0.16	-0.07	-0.48	-0.85	0.43	-0.02	-0.96	1.07	1.17	1.25	0.99	-0.09	1	1	0.98	-1	0.96	0.58	-0.4	1	1.13	-0.95	0.85	-0.58	-0.4	1	0.89	-0.73	1.22	0.61	1.4	0.98	1.34	0.57	0.87
RP1088	3.18	1.9	1.4	1.12	1.06	0.69	1.24	0.5	0.7	0.83	0.16	0.58	2.11	1.11	0.98	1.5	0.58	0.86	1.9	0.32	1.25	0.96	0.86	0.92	0.98	1.49	1	1	-0.99	1.04	0.67	-0.31	0.1	1	-0.59	0.57	0.64	0.21	0.86	1	-0.85	1.1	0.95	2.39	1.29	0.98	1.29	1.78	0.85
RP1089	0.9	0.69	0.55	-0.25	-0.73	-0.28	2.05	0.01	0.47	0.6	-0.87	-0.33	1.68	0.33	1.12	0.34	-0.68	-0.26	0.12	-0.7	-0.86	-0.44	-0.79	-0.5	-1.06	-1.23	1	-0.73	-0.72	-1	-1.38	-0.86	1.03	-0.25	-1.16	-1.18	-0.73	-1.24	1.12	-0.21	-0.68	-1.9	-1.13	-0.36	1.25	-0.25	-0.67	-0.87	-1.01
RP1090	1.62	1.58	1.23	1.26	1.16	1.63	0.27	0.45	0.91	-0.61	-0.22	-0.26	0.59	1.08	1.71	-0.45	0.61	0.42	0.32	-0.64	-0.3	0.93	0.54	0.82	-0.96	-0.2	-1	-0.96	-0.22	-0.38	0.45	-0.14	-0.27	-0.19	0.2	0.28	0.24	-0.69	-0.09	-0.05	0.46	0.18	0.18	0.42	1.06	0.38	1.19	1.1	0.47
RP1091	0.89	1.24	0.24	0.61	0.97	0.38	0.65	0.29	0.31	0.51	0.57	0.65	-0.67	-0.29	-0.99	-0.91	-0.07	-0.79	0.64	0.9	0.37	1.06	1.07	1.18	-1.01	-0.28	-1	-0.96	0.42	-0.66	0.94	0.48	0.61	0.31	1.2	0.67	0.59	-0.26	0.86	0.37	1.13	0.36	0.27	0.94	1.48	1.35	1	0.65	0.94
RP1092	1.05	0.94	0.22	0.13	0.66	0.12	0.55	0.91	0.59	0.04	0.79	0.82	0.51	0.53	0.25	-0.07	0.58	0.3	1.55	1.18	1.1	0.99	1.18	1.01	0.99	1	1	1	1	-0.32	1.05	1.37	1.21	1	1	1.4	0.98	1.3	1.13	1	1	1.08	1.04	1.81	0.97	1.03	1	1.17	1.22
RP1093	2.76	1.57	2.14	1.4	1.71	1.09	1.63	0.97	1.4	1.52	0.96	1.27	1.71	0.93	1.56	1.62	0.81	1.07	2.09	1.09	1.04	1.18	0.89	1	0.89	1.62	1	1	-0.99	0.57	0.97	0.42	0.52	1	0.59	0.69	0.98	0.42	0.62	1	0.52	0.77	1.3	2.41	1.85	1.02	1.74	1.28	1.02
RP1094	1.65	2.27	2.11	0.41	0.07	-0.07	0.85	0.46	0.62	0.02	0.02	-0.01	1.04	0.61	0.62	-0.11	0.01	-0.32	1.3	-0.46	-0.35	-0.29	-0.08	0.2	-0.99	-0.64	1	-0.74	-1.02	-0.5	-0.69	-0.42	-0.44	0.63	-1.22	-0.76	0.1	-0.6	-0.76	0.58	-0.62	-0.97	-0.68	0.24	0.82	-0.3	-0.31	-0.1	-0.13
RP1095	1.99	2.11	1.78	1.24	2.68	2.12	0.88	2.03	1.91	0.7	1.65	1.27	0.13	2.17	2.04	0.16	1.85	1.18	1.93	0.85	0.64	0.63	0.63	0.84	1	0.85	1	1	-0.99	0.65	1.04	0.65	0.62	1	0.94	-0.2	1.02	0.15	0.58	1	0.79	0.02	1.25	1.79	1.43	1	1.08	1.01	0.87
RP1096	2.78	3.04	3.34	2.27	3.05	2.83	0.86	1.2	1.33	0.53	1.28	1.1	1.49	1.64	1.69	1.07	1.74	1.54	1.15	0.8	1.28	-0.05	0.59	0.64	-0.78	0.24	-1	-1	-1.04	0.73	0.83	0.72	0.81	0.86	0.67	0.31	0.45	1.24	0.76	0.31	-0.32	0.61	0.42	1	1.36	-0.39	1.15	0.99	0.77
RP1097	1.78	2.21	0.73	0.88	2.36	1.14	1.6	1.11	1.89	0.97	1.44	1.44	1.34	1.65	1.43	0.91	1.78	1.28	0.97	-0.12	0.12	0.29	0.41	0.41	-0.94	0.76	-1	-1	0.01	1	0.02	0.71	-0.78	-0.45	-0.17	0.85	0.19	0.93	-0.68	-0.31	0.51	0.64	-0.38	1.28	0.95	-0.52	0.18	1.04	0.37
RP1098	1.66	1.17	0.62	0.68	0.75	0.79	2.04	2.58	2.57	2.21	2.36	2.5	1.82	1.78	1.78	1.9	1.44	1.68	2.02	2.32	1.41	0.99	0.63	0.68	1.04	0.06	1	1	1	-1.01	1.16	0.95	1	1	1	-0.54	1.02	-0.48	0.87	1	1	-0.82	1.08	1.54	1.02	1.03	2.12	0.64	1.39
RP1099	1.53	1.14	1.63	0.88	0.85	0.93	1.67	1.2	1.71	1.4	1.41	1.8	1.57	1.19	1.7	1.28	1.17	1.49	1.67	1.14	0.94	1.03	1.09	1.18	0.92	0.49	1	1	1	-0.96	1.17	0.94	1	1	1	-0.34	1.02	-0.29	0.68	1	1	-0.68	0.97	1.02	1.05	1	0.99	0.48	1
RP1100	1.84	2.01	1.2	1.21	2.55	2.21	1.48	1.15	1.12	1.2	1.01	1.14	1.64	1.69	1.86	1.14	1.88	1.89	1.57	0.79	1.24	-0.45	0.64	0.62	-0.96	-0.01	-1	-0.99	-0.97	0.6	0.62	0.37	0.48	0.62	0.12	0.81	-0.49	0.31	-0.31	-0.75	-1.04	0.69	0.24	1.58	1.26	-0.36	1.35	0.93	0.74
RP1101	2.27	2.8	2.26	1.29	1.98	1.74	3.08	2.11	2.31	1.93	1.51	1.74	2.85	2.44	2.52	2.05	1.78	1.74	2.17	1.35	1.29	1	1.53	1.03	1.04	1.73	1	1	1	1	1.12	1.32	0.55	1	1	1.37	1.01	2.09	1	1	1	1.56	1.21	2.33	1.07	1.04	2.12	0.93	1.47
RP1102	0.98	0.16	0.4	1.07	0.61	1.03	0.72	0.34	0.83	0.59	0.65	0.75	0.24	0.24	0.67	0.05	0.33	0.21	1.43	0.94	0.48	0.16	0.42	0.41	1	0.49	1	1	0.04	-0.15	0.91	0.75	0.76	1	0.65	0.21	0.98	-0.27	0.22	1	0.85	-0.36	0.27	0.72	1.56	0.52	1.25	0.2	0.91
RP1103	2.34	2.13	2.21	0.59	1.58	1.12	1.79	1.58	1.48	1.58	1.57	1.64	1.46	2.07	1.92	1.14	1.91	1.67	1.99	1.74	1.4	1.03	1.17	1.14	0.99	1.05	1	1	-0.94	0.87	1.07	0.91	1.21	1	0.99	1.47	1	1.44	1.38	1	0.59	1.14	1.24	1.16	1.72	1	1.15	1.94	1.19
RP1104	2.36	1.25	1.28	1.35	1.25	0.85	-1.14	-0.48	-0.77	-0.71	-0.26	-0.28	1.1	0.42	-0.11	0.56	0.36	0.38	1.31	-0.33	0.83	0.9	0.03	0.45	-0.86	0.1	-1.01	-1	-1	0.23	0.24	0.26	-0.89	0.04	-0.34	0.11	0.05	0.68	-0.57	-0.3	-0.17	0.72	0.42	0.55	1.19	-0.32	1.16	0.75	0.36
RP1105	-0.31	0	-0.4	-1.04	-0.58	-0.6	-0.3	0.58	0.26	-0.65	0.41	0.58	-0.78	0.55	-0.04	-0.85	0.13	0.09	0.28	0.02	0.09	0.86	0.52	0.89	0.85	0.62	-0.58	1	1	-1.11	0.9	1.25	1.06	1	1	-0.46	0.81	0.52	0.59	1	1	-0.74	0.79	0.98	0.76	0.84	0.96	-0.84	0.64
RP1106	0.95	0.9	0.38	0.24	0.34	0.38	1.23	0.69	0.74	0.65	0.3	0.21	2	0.6	1.07	1.19	0.47	0.4	1.59	0.04	0.17	-0.1	-0.3	-0.7	-1.3	0.13	-1	-1	-0.99	-0.63	0.25	0.12	-0.05	0.07	0.37	-0.54	-0.58	-0.63	-0.13	-0.69	-1.06	-0.3	-0.02	0.98	1.49	0.08	2.32	-0.27	-0.3
RP1107	1.53	-0.19	0.46	1.98	-0.1	0.56	0.56	-1.17	-0.53	-0.01	-1	-0.38	0.04	-1.94	-1.36	-0.69	-2.46	-1.86	0.8	-0.62	-2.16	-1.43	-2.55	-2.35	-1.03	-0.45	-1	-1	0.9	-0.99	-2.51	-0.89	-0.89	-1.03	-0.99	-0.64	-1.54	-1.02	-1.6	-1.01	-0.36	-1.58	-2.21	0.64	0.2	-1.58	-0.98	-0.62	-2.59
RP1108	0.79	0.05	-0.08	0.1	-0.27	-0.19	0.97	0.7	0.95	1	0.77	1.22	0.94	0.92	1.13	1	0.75	0.95	0.25	0.69	0.45	0.99	1.3	1.29	0.68	-0.14	-0.84	1	1	-1	0.95	0.6	-0.65	1	1	-1	0.77	-0.45	-1	1	1	-1	0.48	1.08	-0.45	1	1.91	-0.47	0.84
RP1109	1.69	1.35	1.11	1.33	1.45	1.27	1.14	0.9	1.13	0.69	0.65	0.67	1.32	0.75	0.95	0.57	0.55	0.31	0.05	0.51	0.35	0.37	0.48	0.6	-0.91	-0.29	-1	-1	-0.54	-0.41	0.52	0.84	0.49	0.47	0.44	0.52	0.37	0.9	0.26	0.02	0.08	0.33	0.36	-0.23	1.46	-0.01	1.15	0.4	0.63
RP1110	0.09	3.22	2.83	-0.1	0.72	0.84	0.64	2.48	1.65	0.28	1.02	0.73	0.37	2.84	1.92	0.47	1	0.69	0.83	0.17	0.51	0.21	0.1	0.26	0.95	-0.16	1	1	-0.67	-0.94	0.41	0.48	0.07	1	-0.24	-0.16	0.83	0.5	0.96	1	-0.24	-0.28	0.55	0.36	1.4	0.65	0.03	-0.13	0.31
RP1111	1.95	3.58	3.26	0.42	3.27	3.14	1.43	1.08	1.06	0.73	1.14	1.36	1.21	2.1	1.4	0.66	1.98	1.97	1.56	0.27	0.92	0.08	0.5	0.52	1	0.31	1	1	-0.54	-0.01	0.59	0.56	0.33	1	-0.39	0.44	0.81	1.19	0.89	1	-0.4	0.79	0.62	1.06	1.25	0.84	0.99	1.07	0.74
RP1112	2.58	2.83	1.82	0.83	0.45	0.33	1.43	1.41	1.39	0.93	0.77	0.99	0.69	1.3	0.95	0.63	0.36	0.34	1.4	0.76	1.1	-0.56	-0.06	-0.24	0.96	0.1	1	1	-1.02	-0.39	-0.33	-0.13	0.56	1	-1.23	0.14	0.56	0.37	1.43	1	-1.05	0.16	0.02	0.96	1.14	0.36	-0.37	0.17	0.23
RP1113	2.63	1.7	1.46	1.51	2.55	2.57	1.04	1.24	1.21	1.14	1.46	1.3	1.86	1.39	1.45	1.77	1.77	1.67	1.39	1.33	1.27	0.45	0.74	0.76	0.99	0.04	1	1	-0.82	-0.32	0.92	0.82	1.14	1	0.73	0.86	1	1.33	1.29	1	0.56	0.73	1.02	1	1.33	0.99	0.98	0.46	0.96
RP1114	1.87	2.19	2.79	1.67	1.98	2.45	1.43	1.26	1.47	1.5	1.29	1.52	1.23	1.25	1.54	1.29	1.29	1.28	1.85	1.43	1.17	1.03	1.19	1.15	1	1.31	1	1	0.49	0.97	1.12	1.05	1	1	1.22	0.83	1.05	0.83	0.89	1	1.01	0.94	1.08	1.75	1.4	0.99	1.3	1.27	1.12
RP1115	1.62	1.15	0.99	1.03	0.9	1.1	1.44	0.87	1.19	1.41	0.96	1.18	1.82	1.07	1.34	1.45	0.85	1.11	1.61	1.51	1.36	0.33	1.14	0.99	0.97	0.47	1	1	-0.94	0.35	1.06	0.76	1.12	1	0.95	0.99	1.04	1.09	1.18	1	0.94	1.01	1.15	1.57	1.25	1.03	0.17	0.58	1.14
RP1116	0.79	0.87	0.28	0.53	0.42	0.61	1.41	1.42	1.46	0.97	0.93	0.96	1.25	1.29	1.56	1.23	1.2	1.41	0.93	0.55	0.89	-0.26	0.41	0	-1.25	0.65	-1	-1	-0.97	0.14	0.61	0.34	0.51	0.61	0.37	0.09	-0.25	0.93	-0.03	-0.57	-0.45	0.4	0.02	0.99	1.36	-0.45	2.14	-0.2	0.48
RP1117	2.14	1	1.49	0.99	1.18	1.09	1.75	0.71	1.15	0.73	0.59	0.65	2.36	0.63	1.45	1.66	0.91	1.12	1.4	0.26	1.07	0.78	0.31	0.71	-0.78	-0.15	-1	-1	-0.98	-0.14	-0.35	-0.57	-0.68	-0.48	-0.72	0.53	-0.25	-0.18	-0.61	-0.62	-0.73	0.5	0.53	1.18	1.3	-0.3	1.52	1.46	0
RP1118	1.09	1.12	1.03	0.49	1.04	0.8	-0.29	0.36	-0.3	0.32	0.86	0.65	-0.29	0	-0.76	-0.12	0.67	0.01	1.09	0.09	-0.27	-0.16	-0.18	-0.25	1	0.26	-1	1	0.88	-1.04	0.73	1.16	0.47	1	0.29	0.4	1.05	0.75	-0.01	1	0.58	-0.13	0.49	0.92	0.79	0.93	1.24	-1.17	0.47
RP1119	-0.11	0.65	-0.35	-0.49	0.32	-0.18	-1.37	-0.26	-0.35	-1.02	-0.74	-0.2	-1.63	-0.12	-0.85	-1.48	-0.95	-0.87	1.11	-0.78	-0.33	0.81	-0.03	0.81	0.99	-0.06	1	1	1	-0.98	1.02	0.73	0.55	1	1	-1.2	0.94	-0.5	1	1	1	-2.13	0.93	0.82	1.4	0.78	0.94	0.28	0.2
RP1120	2.31	0.49	-0.28	0.16	-0.04	-0.46	1.6	1.31	1.43	1.43	1.53	1.51	1.48	1.22	1.15	0.82	1.3	1.01	2.03	1.9	1.38	1	1.24	1.05	1	1	1	1	-0.57	1.04	1.08	0.87	1.04	1	0.99	1.66	0.99	0.54	0.9	1	1.14	1.05	1.06	1.97	1.32	1.01	0.97	1.18	1.19
RP1121	1.46	-0.29	0.64	0.36	-0.87	-0.24	1.38	0.83	1.21	1.48	1.15	1.53	0.52	-0.51	0.05	0.03	-0.35	-0.04	0.66	1.63	0.38	0.98	0.24	0.93	0.98	0.23	1	1	0.8	-0.94	1.12	0.7	0.37	1	1.15	-0.88	1.04	-0.38	0.86	1	1.12	-0.84	1.17	0.08	1.52	0.88	1.49	0.35	0.87
RP1122	1.19	0.35	0.72	1.21	0.38	0.83	0.64	0.62	0.82	0.56	0.77	0.79	1.51	0.84	0.99	1.04	0.79	0.56	-0.92	0.66	0.18	-1.45	0.46	-0.26	-1.15	-0.98	-1	-0.99	-0.42	-0.19	0.66	0.44	0.26	0.05	0.88	1.15	0.2	0.45	0.77	-0.11	0.52	1.02	-1.66	-0.56	0.77	-1.81	1.07	-0.58	0.57
RP1123	1.02	0.98	1.2	0.82	0.38	0.7	1.45	0.67	1.33	1.01	0.24	0.72	0.61	0.56	1.1	1.02	0.25	0.71	0.63	0.7	0.79	-0.51	0.26	0.13	-0.89	0.19	-1	-1	-0.77	0.45	-0.02	0.4	0.16	0.24	-0.86	0.69	0.11	0.94	0.76	-0.14	-0.5	0.76	-0.65	0.82	0.93	-0.66	-0.79	0.46	0.44
RP1124	0.52	0.29	0.1	-1.42	0.42	0.44	1.13	0.9	1.01	0.99	0.65	0.88	0.48	1.57	1.77	1.04	1.28	1.68	0.72	0.43	1.07	-0.58	0	-0.12	-0.95	0.47	-1	-1	-1.07	0.4	0.06	0.57	-0.12	0.09	-0.06	0.28	-0.4	1.21	1.33	-0.6	-0.91	0.42	-0.22	0.4	1.24	-0.72	-0.35	1	0.1
RP1125	0.39	0.51	0.57	-0.76	-0.65	-0.74	-0.32	0.55	0.2	-0.71	-0.28	-0.85	0.6	0.87	0.52	-0.05	-0.15	-0.53	-0.45	-0.92	-0.84	-0.97	-0.84	-0.63	-0.75	-1.3	-1	-1	-1.03	-1.15	-1.73	-1.33	-1.75	-1.28	-1.34	-1.24	-0.76	-1.25	-0.72	-0.87	-1.16	-1.41	-1.19	-0.91	-0.98	-1.11	-1.05	-0.56	-1.19
RP1126	0.67	-0.41	0.27	0.13	-0.15	0.59	-0.11	0.17	0.79	0.69	0.44	0.44	-0.08	0	0.64	0.35	-0.03	0.51	-0.56	-0.53	-0.86	-0.05	0.26	0.17	-0.9	-1.61	-1	-1	-0.95	-0.74	-0.21	-0.7	-0.51	-0.52	-1.04	0.39	-0.01	-1	0.32	-0.28	-0.03	-0.27	-0.58	-0.53	1.04	-0.74	-0.12	-0.04	0.08
RP1127	0.86	0.56	0.19	0.14	0.37	0.54	-0.75	-0.4	-0.96	-0.88	-0.82	-0.94	-0.57	-0.14	-0.3	-0.16	-0.21	-0.09	1.23	-1.12	-0.31	-0.93	-0.83	-1.67	-1.06	0	-1	-1.01	-0.98	0.15	-0.68	-0.89	-1.02	-0.78	-0.79	-0.46	-1.58	-1.63	-1.11	-1.23	-1.32	0.06	-1.23	0.86	1.33	-0.14	2.17	-0.7	-1.02
RP1128	1.34	0.77	0.43	0.82	1.02	0.53	2.02	1.02	1.14	1.63	0.75	1.08	2.09	1.78	1.37	2.26	1.67	1.85	0.57	0.76	1.57	-0.28	0.13	-0.21	-1.27	0.2	-1	-1	-1.1	0.46	0.29	0.54	0.29	0.41	0.08	0.66	-0.45	1.21	0.39	-0.31	-1.13	0.77	0.21	0.33	1.52	0.2	1.47	0.72	0.16
RP1129	2.08	1.3	0.56	0.17	0.36	0.19	1.53	0.54	0.82	1.5	1.19	1.99	0.56	0.34	-0.62	0.57	0.7	0.88	1.42	1.17	0.61	0.88	0.42	0.61	1	0.99	-0.74	1	0.74	-0.16	0.1	1.1	0.37	1	-0.98	0.97	0.95	1.83	0.45	1	-0.34	0.77	0.83	1.49	0.27	0.89	0.94	0.68	0.8
RP1130	1.34	1.63	0.82	0.71	0.24	-0.05	2.02	1.09	1.13	1.57	0.87	1.07	1.48	1.49	1.11	1.19	1.07	0.82	1.57	0.94	1.18	0.83	0.42	0.68	0.97	0.57	1	1	-1.02	0.25	0.37	0.01	0.74	1	-0.41	0.09	0.86	0.21	0.58	1	0	0.13	0.88	1.32	1.43	0.81	1.23	0.94	0.6
RP1131	1.15	1.54	0.92	0.54	1.19	1.03	0.76	0.51	0.61	0.6	0.26	0.43	1.33	0.78	0.89	0.92	0.74	0.59	1.01	0.24	0.59	-0.24	0.65	0.26	-0.99	0.85	-1	-0.98	-0.99	0.91	0.74	0.4	0.24	0.56	0.51	0.27	-0.05	0.28	0.17	-0.25	-0.62	0.84	-0.03	1.08	1.21	0.21	0.96	0.94	0.7
RP1132	1.52	1.72	1.24	0.93	2.38	2.06	1.37	0.6	0.79	1.37	0.9	1.2	1.3	1.09	1.06	1.45	1.2	1.42	1.95	1.11	1.37	-0.78	0.76	0.55	-1.09	1.13	-1	-1	-0.99	0.8	0.86	0.75	0.8	0.91	0.62	0.83	0.44	1.5	1	0.45	-0.47	0.85	-0.46	1.93	1.18	-0.19	1.12	0.82	0.87
RP1133	0.68	2.45	2.62	-0.11	1.07	1.13	-0.49	1.25	0.44	-0.71	0	-0.46	-0.61	0.86	0.69	-0.4	0.18	-0.25	0.24	-1.02	-0.84	-0.14	-0.39	-0.04	0.91	-0.83	1	1	-0.93	-1.33	0.28	0.25	0.13	1	-0.36	-1.39	0.67	-0.4	0.45	1	-0.8	-1.7	0.2	-0.41	1.23	0.42	-0.31	-0.91	-0.02
RP1134	-0.64	-0.11	-0.4	0.32	0.26	-0.25	0.45	1.09	1.07	0.9	1.22	1.38	-0.39	0.77	0.47	0.31	0.79	0.74	1.4	0.99	0.8	0.98	1.16	0.99	1.02	0.8	1	1	1	-0.64	1.07	1.31	1.1	1	1	1	0.94	0.81	1.11	1	1	0.56	1	1.6	1	1.01	2.12	0.77	1.21
RP1135	2.12	1.14	0.99	1.75	0.46	1.52	0.8	0.81	0.7	0.48	0.71	0.79	1	0.52	0.63	0.29	0.49	0.64	1.28	0.26	-0.09	0.26	0.07	0.39	0.95	-0.32	1	1	-0.99	-0.82	-0.25	-0.76	0.64	1	-1.16	-0.6	0.72	-0.87	0.23	1	-0.53	-1.08	0.71	0.75	1.29	0.8	1.26	-0.07	0.23
RP1136	1.85	0.19	0.99	0.79	-0.32	0.47	2.08	-0.53	1.48	1.67	0.09	1.16	2.13	-0.5	1.18	0.99	0.04	0.71	0.18	1.06	0.58	0.83	0.25	0.55	0.97	-1	-0.4	1	-0.84	-1.07	-0.53	-0.78	1.08	1	-1.33	-0.18	0.57	-0.79	1.16	1	-0.78	-0.9	0.69	0.26	1.06	0.83	-0.21	-0.19	0.37
RP1137	-0.49	0.47	0.37	-0.4	-0.68	-0.51	-0.13	1.68	1.38	0.32	0.5	0.8	-0.42	1.96	1.6	0.24	0.23	0.57	-0.16	0.23	-0.08	1.03	0.51	1.18	0.85	0.43	-1.01	1	1	-1.06	1.16	0.98	-0.12	1	1	-1.33	1	-0.16	-0.64	1	1	-1.39	0.93	1	-0.47	1	0.99	-1.46	0.58
RP1138	1.49	0.17	0.69	0.75	-0.27	0.29	1.23	-0.38	0.07	1.16	0.73	1.36	1.63	0.03	0.7	1.4	0.47	1.34	0.75	0.55	0.51	0.93	0.81	0.96	0.94	0.45	-0.07	1	1	-1.08	0.99	1.25	1.23	1	1	0.25	0.94	0.33	0.96	1	1	-0.43	0.96	1.17	1.58	0.95	1.71	-0.36	0.91
RP1139	2.03	0.52	1.4	1.88	-0.56	0.72	1.91	-0.2	0.56	1.59	-0.31	0.41	2	0.09	1.01	1.73	-0.32	0.24	0.95	0.52	0.04	0.89	0.68	0.68	0.97	-0.28	1	1	0.12	-0.85	0.87	0.5	-0.05	1	0.6	-0.02	0.78	-0.55	-0.4	1	0.91	-0.3	0.81	0.51	1.33	0.89	1.29	0.69	0.92
RP1140	2.38	1.99	1.89	1.44	1.91	2.27	1.16	1.47	1.81	1.15	0.98	1.48	1.72	1.41	1.53	1.2	1.06	1.27	1.32	0.58	0.13	0.87	0.73	0.68	1	0.21	-0.41	1	-0.7	-0.28	0.17	-0.14	0.09	1	-1.01	0.83	0.76	0.04	-0.2	1	-0.35	0.36	0.81	1.35	0.26	0.87	0.23	0.18	0.72
RP1141	1.56	1.58	1.39	0.88	0.89	1	2.41	1.15	2.03	1.3	0.93	1.53	1.91	1.18	1.61	1.19	0.75	1.33	1.4	0	0.28	0.97	0.79	0.97	0.99	0.25	1	1	1	-1	1.01	1.17	0.55	1	1	0.01	0.96	0	1	1	1	-0.61	1.04	1.38	1	1	1	0.5	0.91
RP1142	1.55	0.96	0.84	1.12	0.66	0.61	0.55	0.66	0.55	0.57	0.57	0.66	1.05	0.98	1.1	1.2	1.33	1.36	0.87	0	0.38	0.05	0.63	0.53	-1.18	0.71	-1	-1	-1	0.74	0.73	0.32	-0.27	0.61	0.73	-0.37	0.16	-0.11	0.01	-0.08	0.17	0.57	-0.17	1.53	1.52	0.04	2.28	-0.14	0.47
RP1143	1.71	2.03	1.88	1.47	1.18	1.69	2.2	1.56	2.12	2	1.48	1.92	1.8	1.47	1.7	1.6	1.23	1.51	1.74	1.35	1.04	1.03	0.83	0.87	0.99	1	1	1	-0.68	0.88	0.74	0.82	1.02	1	-0.03	1.15	1.02	0.68	0.85	1	0.77	0.66	1.17	1.64	1.4	0.99	1.09	2	1.03
RP1144	2.71	3.15	3.39	1.16	1.81	1.17	1.49	2.56	1.34	1.01	1.39	0.89	2	3.44	2.07	0.96	1.83	0.88	1.22	0.23	0.05	-0.28	-0.95	-0.76	1	-0.51	1.02	1	-0.29	-0.95	-0.34	-0.41	0.87	1	-1.17	-0.4	0.66	-0.53	0.95	1	-0.5	-0.81	0.31	0.43	1.06	0.71	-0.48	-0.3	-0.27
RP1145	1.81	1.38	1.46	0.74	0.45	0.91	2.36	0.27	1.3	1.09	0.25	1.02	1.9	0.73	1.38	0.98	0.3	0.92	0.91	0.62	0.44	0.13	0.01	-0.13	1.01	0.27	1	1	1	-1	1.08	1.1	1.21	1	1	0.07	0.97	-0.11	1.13	1	1	-0.66	0.52	1.14	0.36	1.01	0.32	-0.27	0.51
RP1146	2.24	2.44	2.32	1.65	2.59	1.94	1.17	1.35	1.2	1.04	1.1	1.08	1.5	2.05	1.95	1.1	1.75	1.35	1.3	0.95	1.09	-0.28	0.56	0.29	-1.1	0.27	-1	-1	-1.01	0.81	0.66	0.65	0.77	0.85	0.12	0.84	0.25	1.35	0.8	0.23	-0.52	0.77	0.07	1.13	1.1	-0.47	0.93	0.99	0.77
RP1147	1.77	0.26	0.66	1.24	-0.37	0.38	1.21	-0.02	0.63	1.36	-0.89	-0.09	1.3	0.03	0.84	1.56	-0.69	0.04	0.43	-0.93	-1.02	0.85	0.3	0.57	-0.26	-1.12	-0.91	1	-0.69	-1	-1	-1.88	-1.74	1	-1.34	-1	-0.96	-1.07	-0.53	1	-0.81	-1	-0.49	-0.12	1.65	0.85	0.35	0.04	-0.71
RP1148	1.83	0.91	1.06	1.71	0.43	0.58	1.16	0.06	-0.03	0.92	0.41	0.6	1.18	0.38	-0.17	1.02	0.48	0.39	1.81	1.1	1.39	0.59	0.27	0.64	0.99	1.62	1	1	0.72	0.87	0.8	1.27	0.72	1	0.27	1.45	0.97	1.78	1.12	1	0.09	1.06	0.41	1.35	1.55	0.48	1.79	1.51	0.53
RP1149	0.69	0.23	-0.04	0.12	-0.23	-0.14	0.95	0.78	1.02	0.99	0.81	1.25	0.89	0.93	1.12	1	0.77	0.95	0.31	0.69	0.43	0.93	1.53	1.25	0.68	-0.14	-0.84	1	1	-1	0.95	0.6	-0.65	1	1	-1	0.77	-0.45	-1	1	1	-1	0.4	1.14	-0.22	0.95	1.91	-0.34	0.94
RP1150	0.95	-0.38	-0.25	-0.12	-0.78	-1.07	0	0.1	0	-0.51	0.04	-0.06	-0.21	-0.13	-0.4	-0.75	-0.27	-0.56	-0.2	0.14	0	-0.15	0.26	0.37	-0.84	-0.67	-1	-1	-0.84	-0.63	0.24	0.59	0	0.15	0.08	0.25	0.52	0.22	-0.28	0.22	0.51	-0.28	-0.23	-0.1	1.15	-0.55	-0.36	-0.12	0.42
RP1151	1.5	1.13	0.91	0.29	-0.56	-0.04	-1.52	-1.37	-1.33	-1.22	-2.09	-1.73	-0.61	-0.73	-0.08	-0.66	-1.73	-1.37	0.61	-1.13	-0.66	0.65	-0.69	0.47	0.97	-0.61	1	1	-0.73	-1.08	0.28	0.18	1.17	1	0.03	-2.02	0.86	-0.8	0.96	1	-0.22	-2.48	0.49	-0.2	1.48	0.56	2	0.55	-0.4
RP1152	-0.08	0.28	1.28	1.34	0.77	1.66	0.6	1.21	1.39	1.03	1.07	1.41	0.76	0.62	0.9	0.73	0.85	0.9	1.86	1.07	0.85	1.03	0.88	0.98	1.01	1.31	1	1	0.28	0.97	0.95	1.1	0.87	1	0.84	0.99	1.04	0.68	0.77	1	0.96	0.44	1.14	1.81	2.04	1.01	1.3	1.28	1
RP1153	-0.09	1.03	0.37	-0.42	0.52	-0.23	0.03	1.29	1.06	0.3	1.11	0.99	-0.54	1.02	0.46	-0.34	0.67	0.28	1.39	1.15	0.78	1.03	1.22	1.2	0.97	0.14	1	1	1	-1.01	1.17	0.83	1	1	1	-0.64	1.02	-0.43	0.87	1	1	-1	1.01	0.97	1.05	1.02	1.93	0.54	1.08
RP1154	0.13	-0.29	-1.13	0.24	-0.38	-0.4	-0.92	-1.4	-1.73	-0.59	-0.58	-0.7	-0.9	-1.09	-1.89	-0.56	-0.71	-0.98	-0.59	-1.46	-1.24	-0.96	-1.46	-1.27	-1.02	-1.5	-1.01	-1	-1.18	-1.02	-2.28	-2.17	-2.3	-1.76	-1.48	-1.27	-1.18	-1.71	-1.64	-1.22	-1.27	-1.9	-1.26	-0.6	-1.36	-1.21	-1.91	-1.31	-1.67
RP1155	0.54	-0.32	-0.7	-0.68	-0.85	-0.84	0.13	-1	-0.8	-0.6	-0.88	-0.96	0.11	-0.72	-0.54	-0.32	-0.92	-0.97	0.43	-0.75	-0.97	0.88	0.42	0.61	-0.24	-1.11	-0.87	1	-0.79	-1	-0.93	-1.92	-1.61	1	-1.42	-1	-0.91	-1.02	-1.67	1	-0.81	-1	-0.46	0.41	1.21	0.89	-0.24	0.09	-0.62
RP1156	0.73	0.22	-0.06	0.11	-0.25	-0.16	0.96	0.74	1.02	0.99	0.79	1.06	0.92	0.92	1.12	1.02	0.76	0.95	0.41	0.69	0.44	0.96	1.41	1.27	0.68	-0.14	-0.84	1	1	-1	0.95	0.6	-0.65	1	1	-1	0.77	-0.45	-1	1	1	-1	0.41	1.16	-0.41	0.98	1.91	-0.39	0.89
RP1157	2.2	1.23	1.06	1.41	0.73	1.27	0.77	0.98	1.23	1.31	1.2	1.82	1.05	1.09	1.11	1.3	1.13	1.64	1.54	0.88	1	0.96	0.54	0.83	1	-0.5	1.02	1	-0.6	-0.71	0.59	0.24	1	1	-0.12	0.25	0.97	0.1	0.83	1	0.32	-0.02	1.01	0.7	1.43	0.98	1.36	0.56	0.82
RP1158	1.35	0.82	0.01	0.32	-0.75	-1.23	-0.84	-1.04	-2.25	-1.39	-1.95	-1.93	-0.59	-0.45	-1.6	-0.72	-1.96	-2.2	0.32	-1.21	-0.97	-0.77	-1.45	-1.26	-0.8	-0.1	-1	-1	-0.98	-0.42	-0.85	0.08	-1.45	-1	-0.51	-0.98	-0.67	0.05	-1.47	-1.11	-0.64	-0.66	-0.39	-0.03	0.96	-0.51	0.97	0	-1.11
RP1159	1.69	1.49	0.99	0.55	1.04	0.69	1.14	1.33	1.34	0.97	1.28	1.22	0.77	1.33	1.12	0.51	1.17	0.93	1.95	1.56	1.33	1.03	0.99	1.02	1.01	1.56	1	1	0.89	1.02	1.11	1.2	1.23	1	1.21	1.32	1.03	0.48	0.86	1	1.07	0.66	1.04	1.89	1.4	0.99	1.5	1.25	1.06
RP1160	1.39	2.36	1.51	-0.3	2.07	1.06	1.47	2.72	2.22	1.02	2.12	1.79	0.46	2.51	1.9	-0.05	1.65	0.96	0.99	1.05	0.45	0.96	0.8	0.89	0.94	-0.41	-0.35	1	-0.01	-1.04	0.97	0.56	0.51	1	0.78	-0.33	0.93	-0.47	-0.12	1	0.73	-0.61	0.85	0.76	1.34	0.98	1.71	-0.23	0.92
RP1161	0.79	0.25	-0.06	0.11	-0.26	-0.17	0.95	0.77	1.02	0.99	0.8	1.24	0.91	0.93	1.12	1	0.76	0.95	0.5	0.69	0.43	0.97	1.49	1.26	0.68	-0.14	-0.84	1	1	-1	0.95	0.6	-0.65	1	1	-1	0.77	-0.45	-1	1	1	-1	0.45	1.13	0.56	0.99	1.91	-0.41	0.92
RP1162	2.91	2.49	3.07	3.18	1.73	2.37	2.93	2	2.5	2.33	1.62	1.94	3.04	2.41	2.81	2.3	1.65	1.85	1.97	1.53	1.44	0.79	0.76	0.83	0.99	1.07	1.02	1	-0.7	0.89	0.76	0.9	1.1	1	0.47	0.81	1.04	0.91	1.15	1	0.77	0.71	0.76	1.57	1.49	0.75	1.23	1.15	1.02
RP1163	2.92	1.57	2.22	1.44	1.42	2.14	2.64	1.87	2.1	2.35	1.88	2.24	2.82	1.94	2.23	2.41	1.8	2.04	1.91	2.27	1.86	1.02	1.19	0.99	1	1.32	1	1	0.31	1.04	1.09	1.3	1.22	1	1.16	2.27	1.01	1.21	0.86	1	1.09	1.59	0.98	1.69	1.42	0.97	1.36	1.23	1.21
RP1164	1.68	2.26	1.37	-0.36	1.3	0.93	-0.15	2.52	1.29	0.14	0.98	0.53	0.79	1.91	1.77	0.8	1.29	1.31	0.82	-0.34	0.25	0.85	0.27	0.66	0.94	0.84	-1.36	1	-0.05	-0.55	0.43	0.91	-0.54	1	-0.55	0.1	0.82	1.66	-0.45	1	-0.51	-0.07	0.89	1.48	1.12	0.83	1.38	-0.46	0.57
RP1165	1.15	0.94	0.6	1.32	1.08	1.31	0.96	0.58	1.26	1.49	1.02	1.52	0.71	0.66	1.09	1.73	1.09	1.61	1.48	0.68	0.8	1	1.17	1.01	1.02	0.59	1	1	1	-0.82	1.06	1	0.55	1	1	0.83	0.97	0.8	1	1	1	0.67	1.06	0.97	1.03	1.04	1.01	0.55	1.22
RP1166	2.78	1.26	1.89	1.8	0.52	1.38	2.19	0.66	1.26	1.52	0.6	1.15	2.24	0.49	1.3	1.77	0.33	0.87	1.65	1.42	1.08	0.99	1.05	0.91	0.96	0.3	1	1	0.33	-0.31	0.83	0.92	0.95	1	0.15	0.92	0.99	0.86	1.38	1	0.66	0.98	0.9	1.23	1.27	1.03	1.24	0.67	1.24
RP1167	2.51	2.01	1.95	1.35	2.42	1.73	2.33	2.12	2.28	1.8	1.43	1.51	2.25	2.13	2.42	1.6	1.77	1.58	0.95	1.03	0.81	-0.64	0.53	0.11	-1.08	0.73	-1	-1	-0.34	0.95	0.63	0.81	0.45	0.32	0.74	0.96	0.16	1.13	0.01	-0.21	0.21	0.81	-0.42	1.23	1.04	-0.34	0.84	0.92	0.58
RP1168	2.34	2.67	2.42	0.69	1.96	0.64	1.15	1.95	1.77	0.83	1.53	1.21	1.87	2.33	2.18	1.57	1.69	1.42	1.81	1.24	1.43	0.53	0.34	0.53	0.98	1.04	1	1	-1	0.87	0.7	0.49	0.74	1	0.17	0.41	0.74	1.1	0.97	1	-0.43	0.87	1.31	1.98	1.35	0.97	1.08	1.16	0.79
RP1169	0.52	-0.06	0.87	0.02	-0.31	-0.3	1.14	0.38	0.59	1.1	0.59	0.7	1.04	0.02	0.34	0.55	0.36	0.12	0.97	0.73	0.53	0.89	0.4	0.69	1	-0.23	1	1	-0.63	-0.7	0.33	0.68	0.66	1	-0.35	0.24	0.95	0.45	0.27	1	0.24	-0.22	0.97	0.6	1.33	0.89	0.64	0.54	0.72
RP1170	1.65	1.92	1.41	1.13	1.55	1.4	1.43	0.96	1.12	1.08	1.02	1.45	1.5	0.92	0.75	0.93	1.09	0.97	1.97	1	1.11	1	1.33	1.02	0.99	1.73	1	1	1	1.05	1.09	1.37	0.55	1	1	1.17	0.98	1.45	1	1	1	1.29	1.04	2.24	1.03	1.04	1.01	1.11	1.34
RP1171	2.58	0.27	1.3	0.65	0.47	0.6	1.5	1.26	1.37	1.48	1.43	1.52	1.78	1.06	1.33	1.16	1.16	1.14	1.76	1.59	1.38	1.02	0.99	0.98	0.97	1.2	1	1	0.03	0.8	1.08	1.09	0.79	1	1.15	1.04	1.04	1.33	1.01	1	0.96	1.18	1.12	1.63	1.42	0.97	1.26	1.28	1.16
RP1172	0.92	0.38	0.74	-0.16	0.48	0.86	-0.06	-0.07	0.35	0.33	0.05	0.29	0.05	0.13	1.06	0.67	-0.05	0.48	0.58	0.18	-0.01	0.9	0.47	0.91	1	-0.43	1	1	-0.22	-0.93	0.99	0.57	1.07	1	0.87	-0.44	1	-0.36	1.56	1	0.43	-0.85	0.92	0.55	1.33	0.9	1.22	0.83	0.72
RP1173	0.36	0.33	0.26	0.17	-0.16	-0.25	0.26	0.57	0.11	0.67	0.38	0.35	0.54	-0.18	-0.21	0.66	-0.38	-0.53	0.4	0.24	-0.59	0.85	0.14	0.45	0.94	-0.29	1	1	0.72	-0.98	0.89	0.47	-0.22	1	0.84	-1.15	0.75	-0.62	-0.4	1	0.76	-0.94	0.71	0.82	1.81	0.83	1.73	0.36	0.73
RP1174	2.48	2.76	2.3	1.99	1.58	1.92	1.81	2.35	1.27	2.53	1.33	1.89	2.04	2.03	1.4	2.42	1.43	1.73	1.85	1.71	1.55	0.97	0.78	0.83	0.94	-0.31	1	1	-0.7	-0.45	0.42	-0.35	1.15	1	-0.61	0.63	0.87	-0.23	1.14	1	0.09	0.3	0.87	1	1.39	1	0.45	0.63	0.93
RP1175	1.2	0.82	0.89	0.45	0.36	0.57	-0.31	-0.19	-0.37	-1.03	-0.38	-0.54	-1.04	0.06	-0.08	-0.78	-0.35	-0.61	0.22	-1.02	-0.85	-0.49	-1.05	-1.04	-0.97	-1.37	-1	-1	-1	-1.09	-1.38	-1.24	-0.94	-0.81	-1.22	-1.62	-1.52	-1.26	-1.11	-1.31	-1.42	-1.46	-0.23	-0.36	1.08	-0.55	0.3	-1.12	-1.19
RP1176	2.85	1.61	1.75	2.21	1.15	1.49	2.15	1.99	2.35	2.4	2.04	2.41	2.35	1.87	2.17	2.5	1.58	1.93	2.01	2.28	1.57	-0.04	-0.63	-0.19	0.68	-0.14	-0.84	1	1	-1	0.95	0.6	-0.65	1	1	-1	0.77	-0.45	-1	1	1	-1	0.76	1.54	0.92	-0.34	2.76	0.44	1.12
RP1177	-0.23	1.2	0.31	0.29	0.92	0.24	0.81	1.16	0.93	1.01	0.98	0.96	-0.1	0.59	0.16	-0.14	0.3	-0.02	0.54	0.63	-0.41	1.02	0.29	0.73	-0.8	-0.76	-1	-1	-1.02	-0.78	0.7	0.28	-0.45	0.64	0.63	-0.94	0.19	-0.58	0.35	0.2	-0.3	-0.62	0.92	0.19	1.49	0.17	1.31	0.55	0.7
RP1178	1.76	2.29	1.61	1.09	1.44	1.02	1.42	0.79	0.76	1.26	0.54	0.76	1.07	1.04	0.77	1.03	0.7	0.59	1.33	0.5	0.89	0.26	0.65	0.62	-0.98	0.16	-1	-0.99	-1.02	0.97	0.43	-0.13	0.05	0.11	0.16	0.51	-0.1	0.16	-0.22	-0.48	-0.13	0.8	0.38	1.12	1.24	-0.22	1.13	1.06	0.51
RP1179	1.12	1.26	0.42	0.4	0.98	0.61	1.11	1.11	1.15	1.11	1.05	1.43	1.48	1.49	1.36	1.46	1.31	1.33	1.85	1	1.15	0.93	1.59	1.24	1.04	0.45	1	1	1	-0.93	1.04	0.69	-0.27	1	1	-0.89	0.93	-0.46	0.17	1	1	-0.56	0.92	1.47	1.09	0.95	1.91	0.55	1.05
RP1180	1.64	0.91	1.43	1.86	0.35	1.08	1.99	-0.48	1.09	1.16	-0.3	1.1	2.05	0.07	0.99	1.42	-0.45	0.67	1.38	-0.59	-0.24	0.81	0.29	0.86	0.87	0.12	1	1	1	-1.05	1	0.86	0.55	1	1	-0.89	0.93	-0.43	1	1	1	-1.81	0.77	0.9	1.4	0.78	0.94	0.14	0.48
RP1181	0.27	1.98	0.86	0.04	1.51	0.47	0.66	0.89	0.88	0.77	1.09	1.14	1.97	1.88	1.76	1.69	1.8	1.55	1.77	0.98	1.5	1.14	0.81	1.22	0.98	1	1	1	-0.76	0.79	1.01	0.85	1.13	1	0.94	0.36	1	1.31	1.2	1	0.51	0.87	1.34	1.9	1.7	1.02	1.16	1.3	0.92
RP1182	1.48	2.15	2.15	1.12	1.82	2.14	1.14	1.39	1.54	1.37	1.25	1.54	0.71	1.79	1.83	1.27	1.58	1.77	1.7	1.33	1.46	0.95	0.74	0.89	-0.9	0.74	-1	-1	-0.97	1	0.51	0.62	0.6	0.63	-0.22	1.17	0.38	1.62	0.9	0.21	-0.31	1.08	0.12	1.61	1.03	-0.26	1.07	1.22	0.88
RP1183	2.43	1.4	2.01	2.05	1.33	1.86	1.54	1.43	1.58	1.37	1.25	1.4	1.95	1.63	2.38	1.39	0.97	1.27	0.52	1.31	0.9	-0.02	0.49	0.53	-1.01	-0.37	-1	-1	-1.01	-0.21	0.88	0.84	0.53	0.71	0.84	0.23	0.53	0.67	0.71	0.24	0.49	0.41	0.09	0.57	1.29	-0.09	1.05	0.63	0.79
RP1184	-0.07	3.57	2.49	-0.11	2.07	1.63	1.4	2.05	2.24	1.43	1.73	1.84	0.87	3.05	2.53	1.29	2.4	2.2	0.88	1.02	1.1	0.89	0.74	0.87	0.99	-0.25	1	1	-0.72	-0.6	0.86	0.94	1.19	1	0.78	0.52	0.95	0.69	1.31	1	0.25	0.42	0.91	0.62	1.33	0.89	0.65	0.55	0.98
RP1185	0.78	3.14	1.5	0.5	1.68	1.23	0.07	0.52	0.03	-0.75	-0.28	-0.47	0.21	1.52	0.24	-0.25	0.5	0.11	1	-1.44	-0.54	0.26	0.12	0.2	0.94	-0.3	1	1	-0.96	-0.79	0.47	0.36	-0.8	1	-0.47	-1.02	0.78	-0.17	0.12	1	-0.41	-0.69	0.95	0.25	1.36	0.88	1.13	-0.07	0.34
RP1186	1.33	0.46	-1.24	-0.34	0.97	0.07	0.65	0.72	0.51	0.83	1.29	1.11	1.26	1.05	0.57	0.86	1.44	1.02	1.39	1.54	1.44	1.01	1.03	1.1	0.99	0.08	1	1	-0.94	-0.12	1.01	0.56	1.2	1	0.76	0.92	1.02	0.71	1.24	1	0.75	0.81	1.31	0.42	1.7	1.02	1.08	0.81	1.11
RP1187	1.93	0.27	0.45	0.92	-0.42	-0.24	1.05	0	0.57	0.98	-0.17	0.22	-0.07	-1.19	-0.61	0.12	-1.73	-1.42	0.24	-0.15	-1.69	-0.11	0	-0.09	0.99	-0.89	1	1	-0.7	-1.03	0.96	0.07	-0.75	1	0.75	-1.18	0.78	-0.94	0.02	1	0.33	-0.97	0.66	-0.1	1.26	0.96	-0.77	-0.76	0.67
RP1188	1.32	1.48	0.8	1.17	0.97	1.07	1.28	0.79	1.09	0.93	0.72	1.13	1.41	0.9	0.87	0.9	0.75	0.89	1.82	1	0.93	0.99	1.19	1	0.94	1.73	1	1	1	1.03	1.04	1.37	0.79	1	1	1.18	0.91	2.23	1	1	1	1.15	1	2.18	0.98	1.02	2.19	1.86	1.23
RP1189	1.46	0.42	-0.59	2.39	0.99	0.73	-0.68	-0.3	-0.61	-0.47	-0.19	-0.58	-0.21	-0.35	-0.87	0.7	-0.44	-0.55	1.43	-0.1	-0.29	1.03	0.84	1.08	1	0.21	1	1	-0.98	-0.58	0.8	-0.22	0.46	1	-0.05	-0.19	0.67	-0.8	0.62	1	-0.53	-0.34	1.16	1.7	1	1.02	1.57	0.68	0.76
RP1190	1.5	1.87	1.32	1.96	1.17	0.8	0.8	1.06	1.07	0.9	1.16	1.29	1.05	1.41	1.61	1.42	1.18	1.15	1.86	1.15	1.2	0.29	0.74	0.62	0.99	1.1	1	1	-0.6	0.89	0.99	1.05	1.24	1	0.96	0.69	1.02	1.04	1.19	1	0.69	0.46	1.12	1.57	1.02	0.94	1.08	1.09	0.93
RP1191	3.37	1.88	2.85	1.76	2.38	2.9	2.04	1.08	1.52	1.37	1.31	1.52	2.28	1.52	2.17	1.67	2.12	2.15	1.83	1	1.38	0.16	0.57	0.61	0.94	1.03	1	1	-0.85	0.72	0.88	1.02	1.02	1	0.79	0.65	0.91	1.72	1.08	1	0.05	0.75	0.89	1.45	0.99	0.86	1.09	1.06	0.81
RP1192	0.27	1.97	0.67	-0.05	1.09	0.03	-0.27	0.16	-0.11	-0.74	-0.45	-0.5	0.41	0.98	0.56	0.09	0.45	0.37	-0.91	-1.28	-0.55	-1.02	-0.31	-0.64	-0.82	-1.01	-1	-0.99	-0.84	-0.36	-0.11	0.21	-1.09	-0.8	-0.08	0.07	-0.55	-0.09	-0.82	-0.96	-0.57	0.25	-0.65	-1.49	-0.17	-1.36	1.06	-0.39	-0.24
RP1193	1.27	1.44	0.97	0.68	1.03	0.94	1.37	0.37	1.06	0.59	0.51	1	0.95	0.66	0.95	0.77	0.68	0.88	1.65	0.93	1.12	-0.54	0.87	0.26	-1.26	1.02	1	-0.55	1	1.05	0.62	1.08	0.94	0.46	1	1.31	0.08	1.43	1	0.29	1	1.27	-2.19	1.14	-0.15	0.4	-0.27	0.66	0.74
RP1194	1.47	0.3	0.33	0.25	-1.3	-0.57	0.89	0.99	0.46	0.49	0.07	0.3	1.12	1.05	0.81	0.83	-0.04	0.16	1.26	0.51	0.43	0.7	-0.08	0.42	1	-0.27	1	1	-0.52	-0.84	-0.38	0.08	1	1	-1.16	-0.32	0.67	-0.11	1.16	1	-0.59	-0.59	0.59	-0.05	0.94	0.68	0.36	0.26	0.19
RP1195	2.05	2.2	1.65	0.75	2.45	1.36	0.73	1.73	1.21	0.86	1.45	1.25	1.57	3.01	2.86	1.6	2.65	2.07	1.78	0.93	1.43	1.01	1.14	1.52	1	1.28	1	1	-1	0.97	1.02	0.48	0.71	1	0.82	0.42	0.95	1.15	1.28	1	0.33	1.12	1.22	2.15	1.6	0.81	1.49	1.13	1.05
RP1196	-0.66	1.21	-0.23	-0.44	0.67	-0.17	-0.31	0.53	0.46	-0.64	0.59	0.5	-0.55	0.24	-0.4	-0.87	0.3	-0.07	1.63	0.58	0.63	0.97	1.11	1	1.01	0.65	1	1	1	-0.77	1.09	1.14	0.78	1	1	0.4	0.99	0	1.09	1	1	-0.29	1.05	1.26	1.07	1	1	0.53	1.17
RP1197	2.73	2.26	2.55	2.11	2.1	2.17	1.68	1.46	1.39	1.43	1.37	1.38	1.9	1.52	1.48	1.4	1.17	1.23	1.97	1.42	1.29	1.01	0.96	1.01	1	1.57	1	1	0.8	1.04	1.11	1.19	1.23	1	1.19	1.17	1.07	0.4	0.95	1	1.06	0.53	0.95	1.79	1.44	0.94	1.56	1.23	1.05
RP1198	1.68	0	0.84	0.04	0.58	0.65	1.52	0.54	1.1	1.09	0.82	1.23	1.51	0.48	1.06	0.28	0.83	0.93	2.08	1.23	1.28	0.45	0.7	0.77	0.99	1.02	1	1	-0.74	0.97	0.87	0.76	1.14	1	0.63	0.66	0.97	0.93	1.21	1	0.36	0.65	0.98	1.63	1.33	0.99	1.01	1.11	0.93
RP1199	0.1	1.27	0.41	0.83	0.46	0.05	-0.09	-0.02	0.22	-0.33	-0.72	-0.88	0.31	0.37	0.62	-0.06	-0.38	-0.65	-0.25	-1.55	-1.57	-1.77	-1.94	-1.63	-0.97	-0.75	-1	-1	-0.82	-1.16	-1.36	0.19	-1.54	-1.07	-1	-1.4	-0.41	-0.4	-0.46	-0.74	-0.77	-1.66	-1.6	-0.57	0.67	-1.13	-1.83	-0.92	-1.34
RP1200	1	1.65	1.57	-0.09	0.19	-0.3	0.46	0.76	0.39	-0.25	0.06	0	0.42	1.09	0.43	-1.3	-0.34	-0.91	-0.46	-0.27	-1.08	0.1	0.24	0.58	-0.99	-2.1	-1	-0.99	-1.01	-1.11	0.1	-0.55	-0.68	-0.25	0.32	-1.32	-0.37	-1.47	-1.03	-0.35	-0.11	-1.31	0.55	-1.6	1.38	0.08	1.05	-1.08	-0.27
RP1201	1.04	1.2	1.38	0.12	0.37	0.3	0.39	1.18	0.75	0.08	0.23	0.17	0.45	1.4	1.13	0.79	0.65	0.35	1.6	-0.18	0.54	0.16	-0.03	0.17	0.96	0.46	1	1	-1	-0.02	0	-0.45	-0.05	1	-0.98	-0.5	0.64	-0.35	0.19	1	-0.52	-0.26	0.65	1.22	1.17	0.74	0.33	0.57	0.09
RP1202	1.37	0.26	-0.06	0.72	0.1	0.42	0.55	0.93	0.98	1.03	1.14	1.36	0.84	0.64	0.49	0.73	0.82	0.84	2.09	1.19	0.98	0.87	0.74	0.82	1	0.58	1	1	0.01	-0.06	0.73	0.82	1.16	1	0.39	0.58	1.02	0.35	1.1	1	0.66	0.14	0.9	1.14	1.34	0.86	1.36	0.79	0.99
RP1203	1.91	1.87	2.06	1.6	1.18	1.56	2.95	1.05	2.14	2.09	0.79	1.64	2.42	1.29	2.18	2.09	0.96	1.81	1.99	0.76	0.85	0.99	1.18	1.01	0.99	0.8	1	1	1	-0.61	1.05	1.37	0.55	1	1	0.91	0.98	1.13	1	1	1	0.91	1.24	1.71	1.02	1.03	2.12	0.97	1.23
RP1204	1.61	2.03	1.54	0.99	0.43	0.76	0.27	-0.12	-0.27	0.87	0.3	0.69	-0.2	0.43	0.04	0.64	0.38	0.43	1.19	-0.21	0	-0.19	-0.38	-0.21	0.98	-0.09	1	1	-0.62	-0.61	0.36	0.62	0.62	1	-0.22	-0.52	0.86	0.24	0.7	1	-0.18	-0.47	0.52	0.52	1.25	0.76	-0.49	-0.11	0.21
RP1205	1.08	1.32	0.52	0.76	1.48	1.47	0.87	0.78	1.02	0.82	0.84	0.98	1.31	0.64	0.98	0.96	0.95	1.27	1.73	0.9	1.1	0.52	0.45	0.28	-1.01	0.16	-1	-0.99	-1.02	0.75	0.59	0.51	0.06	0.17	0.72	0.77	-0.34	0.45	-0.26	-0.58	-0.55	0.93	1.28	1.39	1.66	0.69	1.58	1.1	0.5
RP1206	1.24	0.43	1.17	0.77	0.66	0.92	0.18	-1.62	-0.04	-1.45	-0.77	-1.23	0.6	-1.16	0.09	-0.59	-0.63	-0.88	0.66	-1.8	-1.57	0	-0.99	-0.68	-0.97	-0.4	-1	-1	0.42	-1.03	-0.77	0.23	-2.3	-1.57	0.58	-0.58	-0.64	-0.64	-1.66	-1.15	0.36	-1.32	-0.75	0.19	-0.42	-0.55	0.32	-0.63	-1.14
RP1207	1.55	0.37	1.61	0.76	0.99	1.89	1.72	1.2	1.65	1.29	1.13	1.44	1.95	1.39	2.26	1.26	1.26	1.58	2.22	1.08	1.13	1.03	1.02	1.11	1	1.04	1	1	-0.47	1.03	1.08	0.83	1.22	1	1.09	0.42	1.04	0.45	1.11	1	0.99	0.52	1.09	2.04	1.61	1.01	1.09	1.24	1.09
RP1208	0.52	1.72	-0.62	-0.92	0.41	-0.67	0.27	0.52	0.41	0.31	0.43	0.52	0.03	1.15	0.57	0.18	0.65	0.38	0.76	-0.05	0.3	0.29	0.44	0.49	1	-0.08	0.23	1	-0.5	-0.63	0.59	0.45	-0.04	1	-0.43	0.3	0.88	0.26	-0.08	1	0.25	0.22	0.75	0.14	1.27	0.91	0.98	-0.15	0.63
RP1209	0.06	1.77	0.6	0.77	0.91	0.68	1.4	1.34	1.33	1.5	1.32	1.62	0.63	1.09	0.85	1.03	0.81	0.99	2.26	1.39	0.89	1.02	1.24	1.2	0.91	0.88	1	1	1	-0.57	1.16	1.15	1.06	1	1	0.52	0.96	0.75	1.13	1	1	0.56	1.1	1.53	1.06	1.02	1.92	0.69	1.14
RP1210	1.08	-0.2	0.73	0.87	0.01	0.8	0.66	0.12	0.86	0.23	-0.16	0.06	0.99	0.1	0.68	0.44	0.06	0.35	1	-0.05	0.15	0.12	0.56	0.4	-0.87	0.16	-1	-0.99	-1.01	1.05	0.17	-0.89	-0.76	-0.44	-0.21	0.82	0.11	-1.12	-0.87	-0.03	0.53	0.39	-0.38	0.94	1.03	-0.78	1.06	0.91	0.23
RP1211	0.81	0.47	0.82	0.91	0.99	1.33	1.99	1.08	1.9	1.31	1.14	1.5	1.59	0.93	1.56	0.73	1.01	1.08	1.1	0.91	0.86	0.78	0.53	0.76	0.95	0.44	1	1	0.26	-0.66	0.7	1.04	1.09	1	0.49	0.36	1.03	0.53	1.2	1	0.66	0	0.72	0.99	1.48	0.73	1.48	0.47	0.84
RP1212	1.71	1.81	2.13	0.18	1.26	0.84	0.2	0.2	0.5	0.19	-0.52	-0.12	0.26	0.62	0.87	0.37	-0.27	-0.12	-0.24	-1.47	-1.41	1.02	0.68	0.73	1	-0.74	-1.37	1	-0.75	-1.06	0.55	-0.32	-1.32	1	-0.62	-0.94	0.64	-0.92	-1.39	1	0.51	-0.96	1.1	0.49	1.19	1.02	1.01	-1.12	0.69
RP1213	1.2	0.19	-0.33	0.41	-0.1	-0.55	1.41	-0.29	0.46	0.79	-0.16	0.44	1.51	-0.11	0.33	0.47	-0.23	-0.05	1.69	1	0.69	0.97	0.58	0.65	1	0.5	1	1	-0.98	0.13	0.58	-0.09	0.4	1	-0.69	0.92	0.83	-0.27	0.17	1	0.44	0.31	1.04	1.75	1.29	1	1.14	0.9	0.88
RP1214	0.3	-0.31	-0.59	-0.48	-0.72	-0.68	0.72	0.49	0.71	0.73	0.57	0.89	0.59	0.67	0.69	0.65	0.56	0.73	-0.07	0.41	0.18	1.08	1.53	1.45	0.68	-0.14	-0.84	1	1	-1	0.95	0.6	-0.65	1	1	-1	0.77	-0.45	-1	1	1	-1	1.97	0.65	-0.85	0.99	0.99	-0.99	0.84
RP1215	0.49	-0.08	-0.62	0.03	-0.14	-0.28	0.05	-0.72	-0.02	-0.35	-0.54	-0.1	-0.36	-1.17	-1.18	-0.84	-1.01	-1.02	1.64	-0.36	-0.06	0.94	0.53	0.93	1.01	0.03	1	1	1	-0.99	1.03	0.9	0.55	1	1	-0.66	0.95	-0.44	1	1	1	-1.58	1.04	1.11	0.89	0.95	0.99	0.5	0.7
RP1216	2.04	0.98	1.15	0.29	-0.24	-0.02	0.32	-0.65	-0.06	0.01	-0.79	-0.29	0.91	-0.24	0.31	-0.38	-0.59	-0.48	1.57	0.17	0.41	-0.08	-0.72	-0.01	0.92	0.16	1.01	1	-0.5	-0.92	0.52	0.79	0.98	1	0.27	-0.44	0.97	0.12	0.55	1	0.17	-0.85	1.13	0.49	0.95	0.59	-0.08	-0.25	-0.27
RP1217	1.89	2.09	1.43	1.3	2.12	2.02	1.44	1.53	1.25	1.44	1.62	1.64	1.1	1.79	1.25	1.5	1.99	1.73	1.82	1.52	1.3	0.3	0.74	0.63	1	1.04	1	1	-0.5	0.99	0.8	1.02	1.17	1	0.56	1.05	1.01	1.7	1.2	1	0.56	1.06	0.77	1.69	1.26	0.94	0.96	1.04	1.02
RP1218	1.17	1.67	0.32	0.54	1.11	0.4	0.88	0.84	0.91	0.08	0.76	0.84	0.39	0.73	0.32	-0.01	0.6	0.38	1.73	0.83	0.7	1.01	1.07	1.08	1.03	0.19	1	1	1	-1.01	1.15	0.92	1.09	1	1	0.03	1.02	-0.4	1.13	1	1	-0.88	1.01	1.16	1.06	1.01	1.92	0.62	1.09
RP1219	1.32	2.76	2.53	1.08	3.44	3.32	-0.65	2.09	1.18	-0.68	1.77	1.23	0.07	2.48	1.49	-0.12	2.28	1.58	1.27	-2	-1.51	-0.71	-1	-0.84	-0.99	0.11	-0.97	-1	0.71	-1.01	-0.36	0.72	-1.5	-1.05	-0.39	-0.68	-0.01	0.1	-1.11	-0.67	0.42	-0.96	-1.12	-0.04	1.24	-0.64	-0.57	-1.37	-0.76
RP1220	1.1	1.87	1.96	0.1	1.39	0.76	1.21	1.25	1.08	1.1	1.03	1.04	1.74	1.87	1.52	1.43	1.42	1.15	1.74	0.84	1.47	1.03	1.05	1.14	1	1.08	1	1	-0.46	0.91	0.97	0.57	0.52	1	0.72	0.42	0.97	1.06	1.05	1	0.57	1.1	1.21	1.68	1.38	1	1.17	1.29	1.02
RP1221	1.5	2.69	2.35	1.72	2.91	2.47	0.97	1.25	1.32	0.69	0.94	0.86	1.94	2.24	2.34	0.89	1.62	1.43	1.25	0.95	0.85	0.04	0.56	0.36	-0.93	0.55	-1	-1	-0.88	0.79	0.75	0.85	0.85	0.8	0.4	0.92	0.55	1.17	0.8	0.46	-0.21	0.82	0.07	1.28	1.17	-0.28	0.94	1.07	0.82
RP1222	0.04	0.55	0.06	-0.11	-0.09	0.36	0.55	0.15	0.41	0.51	0.28	0.44	0.24	-0.39	-0.02	0.06	-0.29	-0.4	-0.32	0.1	-0.23	-0.36	0.39	0.23	-0.86	-0.82	-1	-1	-0.54	-0.66	0.65	0.69	0.12	0.3	0.82	-0.26	0.32	0.04	-0.05	-0.13	0.11	-0.28	-0.09	-0.18	1.13	-0.49	0.91	0.23	0.48
RP1223	1.98	0.25	1.71	1.6	0.65	1.69	1.68	0.72	1.04	1.3	1.08	1.28	2.17	0.74	1.03	1.42	1.03	1.15	1.76	1.41	1.31	0.92	1.06	0.96	0.98	1.15	1	1	0.1	0.89	1.07	1.23	1.09	1	1.17	1.38	1.04	1.01	1.12	1	1.17	1.02	0.98	1.68	1.64	0.93	1.22	1.24	1.18
RP1224	2.38	2.04	1.9	1.86	1.47	1.58	2.63	1.33	1.58	1.9	1.38	1.71	2.68	1.35	1.57	1.89	1.35	1.52	1.99	1.54	1.37	1.01	1.39	1.09	0.89	1.73	1	1	1	1	1.13	1.37	1.09	1	1	1.9	1	1.55	1.13	1	1	1.52	0.97	2.19	1.06	1.02	1.92	1.24	1.32
RP1225	1.59	1.46	2.13	0.56	0.84	0.94	1.53	1.6	1.71	1.52	1.46	1.53	1.22	1.3	1.42	0.86	0.86	0.81	1.65	1.63	0.92	1.01	0.86	0.85	1	0.84	1	1	0.77	-0.01	1.1	1	0.94	1	1.18	0.77	1.01	0.12	0.83	1	1.09	0.2	1.13	1.55	1.7	1.02	1.32	0.9	1.17
RP1226	1.02	0.54	0.59	-0.13	-0.37	-0.19	1.34	1.21	1.34	0.7	0.52	0.56	2.26	0.48	1.68	1.29	-0.25	0.28	0.08	-0.12	-0.45	-0.67	-0.29	-1.02	-1.1	0.75	-1	-1	-1.03	0.66	0.29	0.12	0.25	0.24	0.27	-0.41	-0.21	-0.08	0.36	-0.4	-0.29	-0.25	-0.33	-0.25	1.29	-0.84	2.09	-0.43	-0.23
RP1227	1.9	0.01	-0.54	-0.11	-0.9	-0.74	0.58	-0.91	-1.05	0.03	-0.88	-0.64	0.58	-0.69	-0.81	-0.22	-0.8	-0.84	0.49	-0.4	-0.78	0.05	-0.62	-0.04	0.98	-0.65	1	1	-0.76	-1.15	-0.04	-0.18	0.23	1	-0.63	-1.35	0.6	-0.86	-0.25	1	-0.35	-1.36	0.57	-0.75	1.47	0.7	1.09	-0.55	-0.39
RP1228	1.69	0.08	-0.16	0.52	0.19	0.47	1.18	0.12	0.54	0.61	0.04	0.23	1.9	-0.25	0.66	1.02	0.24	0.42	0.82	0.03	0.83	-0.38	-0.27	-0.59	-0.98	0.16	-1	-0.99	-1	0.26	0.17	0.23	-0.03	-0.17	0.31	0.18	-0.64	0.21	-0.68	-0.89	-0.99	0.36	0.15	1.15	1.54	-0.26	1.14	0.62	-0.22
RP1229	0.38	-0.13	0.2	-1.16	-0.67	-0.17	0.13	-0.02	0.15	0.28	0.09	0.24	-0.21	-0.64	-0.34	-0.83	-0.56	-0.34	-0.42	-0.02	-0.42	0.11	0.74	0.46	-0.94	-0.84	-1	-1	-0.3	-0.22	0.62	0.52	-0.36	-0.01	0.83	0.49	-0.22	0.23	-0.8	-0.81	0.49	0.66	0.22	-0.3	1.38	0.07	0.93	-0.09	0.55
RP1230	1.44	1.13	0.13	1.28	1.28	1.24	1.18	1.13	1.28	1.63	1.25	1.69	1.45	1.66	1.42	1.59	1.5	1.8	1.85	1.32	1.29	1.03	0.94	0.97	0.98	1.1	1	1	-0.27	1.05	1	0.88	1.13	1	0.81	1.19	1.04	0.92	1.31	1	0.91	0.88	1	1.67	1.39	1	1.16	1.22	1.05
RP1231	0.87	0.73	-0.82	-0.12	0.83	0.04	0	0.83	0.56	0.57	1.03	0.94	-0.68	1.02	0.17	0.25	1.05	0.5	1.66	0.89	0.73	1.01	1.15	1.18	0.99	0.09	1	1	0.28	-0.62	1	0.8	0.97	1	0.84	0.7	1.02	0.5	1.32	1	0.72	0.39	1.04	1.08	1.6	1.02	1	0.64	1.12
RP1232	0.13	1.71	0.12	0.32	2.58	0.79	0.3	1.86	1.44	0.61	1.88	1.46	0.18	1.94	1.57	0.77	2.15	1.41	1.67	1.15	1.11	0.32	1.05	0.94	1.01	0.51	1	1	-0.21	0.19	1.06	0.83	0.67	1	0.98	0.4	1.04	0.98	1.1	1	0.85	0.68	0.82	1.32	1.27	1.03	0.9	0.56	1.02
RP1233	1.37	2.18	2.15	0.43	2.12	1.78	0.42	1.59	1.33	0.58	1.51	1.32	0.06	1.84	1.43	0.23	1.74	1.16	0.51	0.64	0.34	0.34	0.66	0.49	-0.98	-0.35	-1	-1	-0.68	0.4	0.6	0.25	0.29	0.41	0.07	1.01	0.43	0.14	0.05	0.16	0.56	0.78	-0.1	-0.11	1	-0.55	0.77	0.92	0.71
RP1234	2.25	1.95	1.29	0.52	1.61	1.29	1.18	0.92	1.09	1.49	1.18	1.48	1.07	0.98	0.73	1.36	0.94	1.06	1.82	1.18	1.18	0.2	0.59	0.47	1.01	1.02	1	1	-0.81	0.98	0.8	0.73	0.72	1	0.16	1.13	0.91	1.6	0.98	1	-0.03	1.08	0.71	1.77	1.24	0.93	-0.2	1.02	0.87
RP1235	1.35	1.38	0.92	1.61	0.61	0.83	-1.09	-0.19	-0.37	-1.07	-1	-1.09	-0.48	0.4	0.18	-0.32	-0.29	-0.33	1.54	-1.23	-0.73	0.75	0.31	0.54	-0.82	-1.33	-1	-0.99	-1	-0.35	-0.76	-2.12	-1.4	-0.88	-1.22	-0.74	-0.53	-1.7	-1.12	-0.03	-0.29	-0.67	0.09	1.62	1.27	-0.16	1.87	0.51	-0.53
RP1236	0.72	1.16	1.77	0.94	1.07	1.68	0.23	0.18	0.2	0.09	0.21	0.12	-0.56	0.35	1.09	0.06	0.33	0.51	-0.02	-0.14	-0.1	-0.75	-0.41	-0.99	-0.79	-0.1	-1	-1	-1.02	0.23	-0.1	0.11	-0.12	0.05	-0.44	-0.15	-0.48	0.15	-0.66	-0.85	-0.67	0.17	-0.69	-0.31	1.17	-0.92	-0.84	0.78	-0.15
RP1237	0.84	-0.83	-0.59	-0.53	-0.96	-1.3	0.52	-0.48	-0.16	-0.07	-0.7	-0.53	1	0.09	0.24	0.59	-0.55	-0.28	-1.06	-1.11	-0.96	0.08	0.63	0.48	-0.97	-2.09	-1	-0.99	-0.81	-0.94	0.16	-0.92	-1.01	-1	0.48	-0.11	0.12	-1.28	-0.79	-0.22	0.98	-0.68	-0.6	-1.02	1.04	-0.69	0.83	-0.49	0.2
RP1238	2.52	2.16	2.99	0.3	1.94	1.69	0.39	1.46	1.34	-0.08	1.35	0.78	0.29	1.7	1.41	-0.38	1.5	0.62	1.91	0.83	0.77	0.87	0.81	0.83	0.97	1.24	1	1	0.22	1.05	0.79	0.8	0.22	1	0.2	1.24	0.77	0.19	-0.09	1	0.76	0.68	0.78	1.61	1.34	0.86	1.34	1.14	0.79
RP1239	2.76	1.35	2.47	1.44	0.03	0.89	2.32	1.21	1.54	1.9	0.87	1.31	2.47	1.33	1.68	1.91	0.69	1.01	1.86	1.22	0.77	1.03	1.18	1.04	1	1.21	1	1	-0.92	1.03	1.07	0.66	0.77	1	0.94	0.9	1	-0.03	0.64	1	1.23	0.33	1.06	2.02	1.72	1.01	1.18	1.24	1.15
RP1240	2.43	1.91	1.51	1.62	1.26	1.24	1.69	1.04	1.19	0.94	1.09	1.34	2.1	1.09	1.19	1.23	1.17	1.1	1.65	0.9	0.95	0.94	1.22	1.01	0.85	1.73	1	1	1	0.97	1.05	1.37	0.55	1	1	1	0.94	1.71	1	1	1	1.2	0.89	2.04	0.96	0.96	0.99	1.24	1.25
RP1241	1.01	0.5	0.95	1.26	0.22	1.26	-0.01	0.67	1.36	0.3	0.59	1.07	0.15	0.26	1.32	0.78	0.08	0.86	0.72	-0.01	-0.57	0.3	0.14	0.2	0.94	-0.8	1.02	1	-0.03	-0.99	0.74	-0.05	1.15	1	0.24	-0.8	0.92	-0.91	1.03	1	0.46	-1.48	0.56	0.04	1.81	0.97	0.33	0.19	0.54
RP1242	0.9	0.59	0.82	1.5	0.33	0.64	1.04	-0.69	-0.41	0.76	-0.8	-0.36	0.39	-0.74	-0.63	-0.17	-0.81	-0.79	1.17	-0.35	0.36	0.48	0.34	0.66	-0.79	-0.25	-1	-0.96	-1.04	0.04	0.45	-0.2	-0.52	0.26	0.08	-0.3	0.13	-0.81	0.21	0.17	-0.48	0.17	0.8	1.19	1.37	0.85	1.2	0.71	0.35
RP1243	2.13	1.28	0.99	0.98	1.3	0.78	1.1	1.3	1.2	1.07	0.82	1.09	1.69	1.56	1.61	1.82	1.1	1.12	1.1	0.72	1.05	0.48	0.71	0.64	0.98	0.15	1	1	-1	-0.14	0.63	-0.08	0.84	1	-0.48	0.59	0.95	0.07	1.26	1	0.12	0.4	0.96	1.38	1.71	1.02	1.07	0.45	0.84
RP1244	1.42	0.6	1.41	1.53	0.55	0.72	0.46	-0.24	0.3	0.22	-0.29	0.03	1.82	0.76	1.61	1.75	0.71	1.23	1.66	-0.52	0.69	0.11	0.11	0.12	-1.33	0.22	-0.06	-0.98	-1.02	0.97	-0.61	-1.06	-0.5	-0.24	-0.99	-0.12	-0.83	-0.69	0.49	-0.52	-1	0.68	-0.35	0.96	1.26	0.21	1.07	0.98	-0.42
RP1245	1.58	0.49	0.8	1.65	1.37	1.38	2.01	1.61	1.58	1.36	1.65	1.54	2.05	1.64	1.25	1.01	1.85	1.36	1.33	1.02	1.08	0.05	0.58	0.46	1	-0.07	1	1	-0.72	-0.45	0.9	0.62	1.08	1	0.63	0.49	0.95	0.37	1.35	1	0.33	0.3	0.84	0.76	1.68	0.97	0.86	0.33	0.76
RP1246	-0.22	0.88	1.54	-0.17	1.34	1.29	-1.05	-0.17	-0.05	-0.84	0.02	-0.03	-0.25	0.86	1.09	-0.74	1.05	0.92	0.62	-0.67	0.07	0.3	0.35	0.29	-0.99	-0.07	-1	-1	-0.32	0.38	-0.04	0.31	-1.07	-0.74	-0.39	0.99	-0.3	0.83	-0.54	-0.84	-0.33	0.94	-0.43	0.76	0.88	-0.67	1.01	1.3	0.16
RP1247	2.04	2.05	1.03	1.33	2.58	1.86	1.82	0.78	1.21	1.58	0.96	1.41	2.11	1.41	1.61	1.73	1.64	1.82	2.78	0.89	1.21	1.02	1.01	1.1	0.98	1.02	1	1	-0.87	1.04	0.93	0.49	0.72	1	0.53	0.67	0.88	0.64	1.1	1	0.3	1.08	1.07	2.07	1.34	1.02	1.08	1.2	1.01
RP1248	0.73	0.22	-0.06	0.11	-0.25	-0.16	0.95	0.77	1.02	0.99	0.81	1.25	0.91	0.93	1.12	1	0.76	0.95	0.41	0.69	0.43	0.96	1.51	1.26	0.68	-0.14	-0.84	1	1	-1	0.95	0.6	-0.65	1	1	-1	0.77	-0.45	-1	1	1	-1	0.41	1.16	-0.42	0.98	1.91	-0.39	0.93
RP1249	0.77	0.38	0.18	0.45	0.24	0.16	1.6	0.58	1.47	0.38	-0.05	0.32	1.06	0.32	0.83	0.4	-0.16	0.17	1.32	0.31	0.47	0.99	1.02	1	1.02	0.29	1	1	1	-0.99	1.06	1.2	0.55	1	1	0.33	0.97	0.09	1	1	1	-0.28	1.07	1.41	1	1.03	1.01	0.55	1.1
RP1250	0.74	1.85	1.81	0.57	0.1	0.44	-0.34	-0.2	0.54	-0.04	-0.98	-0.4	1.08	0.21	1.22	-0.22	-0.7	-0.37	1.25	-0.09	0.31	0.71	-0.45	0.51	0.92	-0.76	0.99	1	-1.31	-1.18	0.13	0.11	1.23	1	-0.32	-1.24	0.85	-0.42	0.92	1	-0.19	-1.63	0.62	-0.12	1.34	0.64	-0.04	0.76	-0.16
RP1251	2.55	2.73	2.5	2.02	2.17	2.24	2.38	2.08	2.21	2.09	1.88	2.13	2.5	2.48	2.55	2.12	2.08	1.88	2.18	1.46	1.23	0.99	1.6	1.03	1.04	1.73	1	1	1	1	1.12	1.2	0.55	1	1	1.17	1.01	2.47	1	1	1	1.31	1	2.39	1.08	1.02	2.12	0.87	1.52
RP1252	1.36	0.71	0.72	0.86	0.09	0.42	0.05	-0.81	-0.08	-0.11	-0.95	-0.37	0.53	0.31	0.4	0.72	-0.25	0.16	0.66	-1.19	-0.13	0.64	-0.25	0.13	-1.16	-0.05	-1.08	-1	1	-0.67	-2.15	-0.89	-2.28	-0.91	1	0.47	-1.54	0.47	-1.61	-1	1	0.53	-1.12	0.57	-0.59	-1.16	0.94	0.04	-1.37
RP1253	1.46	1.4	0.31	0.31	1.08	0.81	1.14	1.85	2.02	0.67	1.53	1.8	0.66	1.44	0.94	0.17	1.15	0.98	1.54	0.41	0.56	0.99	1.07	1	1.02	0.36	1	1	1	-0.97	1.06	1.25	0.55	1	1	0.48	0.97	0.25	1	1	1	-0.02	1.06	0.86	1.02	1.03	2.12	0.7	1.14
RP1254	1.15	2.55	2.25	1	3.15	2.53	1.92	1.74	2.03	1.84	1.71	1.96	1.58	1.8	2.05	1.72	1.8	1.93	1.89	1.73	1.54	1.08	0.77	0.98	1	1.37	1	1	-0.99	0.94	1.07	0.47	0.27	1	1.01	-0.04	0.99	0.69	0.96	1	0.75	1.14	1.27	2.24	1.48	0.99	1.43	1.26	1.2
RP1255	2.3	1.86	1.45	1.39	1.45	1.51	0.51	0.77	0.47	0.44	0.27	0.25	1.57	1.58	1.24	0.71	0.9	0.63	1.02	-0.21	-0.03	0.33	0.2	0.1	-1.1	-0.72	-1	-1	-1	-0.58	0.36	0.38	-0.11	0.03	0.47	-0.14	-0.63	-0.03	-0.59	-0.97	-0.45	-0.05	1.35	0.69	1.6	0.44	1.58	0.15	0.13
RP1256	0.44	1.28	0.87	-0.14	2.1	1.15	1.11	0.87	0.83	1	0.82	0.91	1.07	0.64	0.59	0.15	0.26	-0.14	0.6	0.93	0.23	-1.02	0.93	0.55	-0.99	0.32	-1	-1	-0.52	1.03	0.99	0.68	0.61	0.65	1.16	0.24	0.6	0.37	0.56	0.32	0.9	0.58	-1.37	1.03	0.94	-0.98	-1.85	0.58	0.89
RP1257	1.25	1.87	1.16	0.76	0.88	0.39	-0.29	0.43	0.22	-0.09	0.18	0.01	0.31	0.58	0.3	-0.13	0.03	-0.14	1.56	0.03	0.17	0.43	0.51	0.49	-0.79	0.47	-1	-0.96	-1.03	0.74	0.45	-0.1	-0.32	-0.37	0.62	0.63	-0.35	-0.81	-0.68	-0.75	-0.31	0.83	0.84	1.51	1.35	0.81	1.24	1.14	0.42
RP1258	0.78	0.32	0.4	1.35	0.36	0.81	1.86	0.5	1.16	1.64	0.72	1.29	1.29	-0.07	0.68	1.23	0.25	0.87	1.06	0.99	0.49	0.23	0.85	0.57	0.89	0.76	1	1	1	-0.72	1.12	1.15	1.18	1	1	0.62	0.96	0.61	1	1	1	0.23	0.4	1.19	0.74	1.02	0.21	-0.08	0.97
RP1259	2.34	1.7	0.98	0.89	0.71	0.79	2.07	1.46	1.31	2.15	1.43	1.75	2.18	1.6	1.05	1.96	1.47	1.42	1.78	2.05	1.63	0.93	1.44	1.13	0.96	1.21	1	1	-0.92	1.05	1.13	0.83	1.15	1	1.05	1.75	1.02	1.1	1.03	1	1.26	1.62	0.84	2.21	1.27	0.95	1.05	0.98	1.3
RP1260	0.83	1.99	1.9	0.62	0.75	0.82	0.26	1.19	0.85	0.24	0.59	0.48	0.61	1.27	0.97	0.37	0.56	0.09	-0.34	0.24	0.08	-0.42	-0.05	-0.5	-0.83	-0.85	-1	-1	-0.83	-0.76	0.59	0.74	0.38	0.35	0.71	-0.02	0.28	0.54	-0.2	-0.13	0.04	0.07	0.06	-0.73	1.15	-0.4	1.03	-0.56	0.24
RP1261	2.44	0.8	1.06	0.61	0.1	0.47	1.54	-0.03	1.1	1.27	0.46	1.5	0.97	-0.1	0.4	0.94	0.26	0.8	1.6	1.24	1.06	0.99	0.89	0.91	1	1.31	-0.41	1	0.49	0.65	0.9	1.19	0.96	1	0.85	1.18	1.04	1.56	0.89	1	0.96	0.99	1.01	1.96	0.4	1.02	1.31	0.39	1.12
RP1262	1.51	-0.84	-1.16	1.05	-0.46	-0.81	-0.52	-1.26	-1.36	-0.31	-1.15	-0.7	-0.1	-0.87	-1.12	-0.23	-0.65	-0.41	0.37	-0.9	0.26	-0.69	-0.57	-0.6	-0.92	0.18	-1	-1	-1.08	0.44	-0.55	-0.36	-0.99	-0.69	-0.8	-0.05	-0.75	-0.15	-0.5	-0.87	-1.11	0.29	-0.31	0.43	1.19	-0.9	-0.12	0.62	-0.72
RP1263	1.54	2.12	1.9	0.73	1.51	1.18	0.31	0.68	0.73	0.19	0.33	0.23	0.21	0.45	0.77	-0.51	0.3	0.08	1.61	-0.33	-0.03	1.08	0.89	1.32	-0.9	1.32	-1	-0.96	-0.56	0.94	0.45	-0.2	-0.76	-0.53	0.79	0.05	-0.44	-0.33	-1.22	-0.93	0.31	0.87	0.87	1.71	1.52	1.45	1.15	1.26	0.48
RP1264	2.28	2.65	2.18	0.93	1.42	1.02	0.87	0.64	0.72	0.19	0.35	0.34	1.55	1.16	0.94	0.47	0.61	0.53	1.55	0.01	0.27	-0.18	0.09	-0.04	0.99	0.28	1	1	-0.91	0.03	0.23	0.03	0.33	1	-0.92	-0.02	0.77	-0.02	0.58	1	-0.32	0.03	0.65	1.11	1.23	0.84	0.92	0.35	0.4
RP1265	2.24	2.1	2.12	0.46	1.62	1.22	1.54	0.73	0.9	1.19	0.7	1.09	0.97	1.05	0.78	0.94	0.77	0.85	1.86	0.92	1.11	0.48	0.97	1.02	1	0.72	1	1	-0.76	0.63	0.94	0.44	0.75	1	0.6	0.51	0.91	0.79	1.18	1	0.19	0.92	1.03	1.63	1.97	0.99	0.88	0.86	0.98
RP1266	1.41	1.96	1.29	0.94	1.09	1.1	0.9	0.87	0.88	0.94	0.83	0.96	0.43	1.08	1.08	0.9	1.23	1.26	1.73	0.56	0.74	-0.47	0.49	0.14	-1.1	-1	-1	-1	-1	0.77	0.54	0.38	0.23	0.45	0.15	0.68	-0.39	-0.21	-0.24	-0.62	-0.99	0.73	0.07	2.13	1.23	0.14	1.68	0.91	0.59
RP1267	2.5	2.43	2.81	1.29	1.68	1.68	1.04	0.88	0.95	0.88	0.77	0.93	1.18	1.78	1.91	1.19	1.27	1.26	1.42	0.52	1.13	0.36	0.47	0.74	-1.03	0.38	-1	-1	-0.98	0.76	0.64	0.53	0.28	0.69	0.35	0.21	0.39	0.97	0.36	0.29	-0.24	0.65	0.78	1.28	1.46	0.22	1.06	1.13	0.56
RP1268	1.26	0.94	0.98	1.02	0.71	0.91	-0.87	-0.21	-0.09	-0.83	-0.26	-0.51	0.11	0.49	0.46	-0.12	0.31	-0.2	0.25	-0.46	0.16	-0.24	0.39	0.23	-1.03	0.65	-1	-0.99	0.66	0.85	0.47	0.53	-0.51	-0.44	1.2	0.67	0.07	0.86	-0.64	-0.46	1.06	0.85	-0.39	0.31	0.94	-1	1.35	0.93	0.41
RP1269	1.13	1.53	0.44	1.07	1.07	0.83	0.03	0.23	0.19	0.29	0.46	0.42	-0.91	-0.26	-0.51	-0.67	-0.24	-0.44	1.27	0.6	0.17	1.03	0.87	1.07	-0.94	0.68	-1	-0.96	-0.88	0.96	0.81	0.23	0.33	0.09	1.03	1.13	0.03	-0.23	-0.29	-0.44	0.54	1.07	0.39	1.55	1.31	0.93	1.08	2.05	0.83
RP1270	2.54	0.09	1.03	1.67	0.34	0.81	0.42	-0.24	-0.02	0.63	-0.29	0.11	1.56	-0.59	-0.19	1.16	-0.58	-0.22	1.89	-0.04	0.63	0.21	-0.04	0.21	-0.76	0.2	-1	-1	-0.97	-0.22	0.39	0.15	0.16	0.52	-0.02	-0.39	0.23	0.2	0.27	0	-0.51	0.04	0.7	1.58	1.25	-0.11	1.44	0.86	0.18
RP1271	1.91	1.33	1.33	0.79	1.07	1.18	0.84	0.99	0.96	1.06	0.83	1	1.37	1.42	0.95	1.36	1.16	1.28	0.8	0.52	0.59	0.93	0.55	0.8	1	-0.71	1	1	-0.78	-0.91	0.58	0	1.05	1	-0.38	0.19	0.9	-0.29	1.35	1	0.04	-0.24	0.98	0.4	1.64	0.94	1.06	0.44	0.74
RP1272	1.05	-0.23	0.47	1.24	-0.29	0.52	0.59	-0.79	0.19	-0.13	-0.7	-0.21	1.52	-0.25	0.65	0.76	-0.44	0.14	1.77	-0.55	0.6	-1.18	-0.51	-1.09	-0.95	0.91	1	-0.84	-1.02	0.49	-0.11	0.01	-0.38	0.72	-0.72	-0.31	-0.25	0.64	0.83	0.28	-1.04	0.33	-0.7	1.18	0.67	-0.69	-1.28	0.98	-0.48
RP1273	2.2	1.49	1.66	0.15	1.65	1.26	2.86	1.37	1.92	2.24	1.43	1.71	3.18	1.79	2.48	2.08	1.39	1.59	1.84	1.46	1.16	1.14	0.94	1.12	0.96	1.36	1	1	0.48	0.82	1.08	1.06	1.2	1	1.14	1.22	1.05	1.1	1.27	1	0.96	0.83	1.25	1.86	2.05	1.02	1.3	1.3	1.03
RP1274	1.19	2.15	1.14	0.77	1.07	0.87	0.87	0.91	1.12	1	1.06	1.2	0.53	1.24	0.78	1.17	1.27	1.31	1.62	0.76	0.84	0.35	0.75	0.72	-1.15	-1	-1	-0.98	-1	0.86	0.78	0.5	0.44	0.47	0.61	1.08	0.38	0.22	0.24	0.11	0.4	1.04	-0.01	2.17	1.21	0.52	1.63	1.13	0.83
RP1275	1.85	3.73	2.88	1.34	2.1	1.31	2.77	1.15	1.66	2.45	0.98	1.41	3.2	2.48	2.31	2.71	1.7	1.92	1.78	0.95	1.69	0.19	0.41	0.64	-1.21	0.25	0.53	-0.78	-0.96	0.97	-0.2	-0.03	0.84	-0.22	0.28	0.57	-0.66	0.26	1.48	-0.39	-0.06	0.79	-0.33	0.93	1.28	0.4	0.09	1.02	-0.04
RP1276	1.91	2.31	2.25	1.2	0.67	0.96	1.35	1.39	0.9	1.12	0.46	0.85	1.11	1.61	1.35	0.7	0.37	0.68	1.64	0.93	0.92	0.78	0.19	0.7	0.95	-0.35	0.98	1	-1.36	-1.05	0.37	0.29	1.24	1	-0.15	-0.41	0.87	-0.11	1.07	1	-0.22	-0.86	0.78	0.28	0.89	0.74	1.68	0.24	0.46
RP1277	2.17	1.72	1.9	1.53	2.31	1.7	0.79	0.91	1.32	0.64	0.57	0.63	0.91	1.34	1.56	1.76	1.08	1.17	1.46	0.57	1.17	0.19	0.35	0.48	-0.83	0.38	-1	-1	-1.01	0.26	0.07	-0.33	0.37	0.38	-0.61	0.05	0.03	-0.07	0.07	-0.16	-0.71	0.36	-0.11	1.41	0.99	-0.31	1.07	1.01	0.44
RP1278	2.37	2.52	2.77	1.76	1.79	1.33	1.69	1.71	2	0.78	1.09	0.99	1.47	2.19	2.51	0.74	1.71	1.25	1.58	0.39	0.92	-0.11	-0.07	0.09	0.98	-0.13	1.02	1	-0.83	-0.47	0.46	0.22	0.99	1	-0.02	-0.61	0.83	0.27	0.84	1	-0.31	-0.21	0.7	0.72	1.05	0.84	-0.21	0.4	0.36
RP1279	1.78	3.35	3.08	1.08	3.12	2.43	1.44	1.9	2.05	0.76	1.52	1.31	2.46	2.82	2.77	1.64	2.29	1.92	1.61	1.16	1.34	0.62	0.61	0.82	0.96	1.36	1	1	-0.15	0.71	0.92	1.19	1.17	1	0.97	0.9	0.99	2.03	1.3	1	0.48	0.8	0.43	1.24	1.61	0.52	1.45	0.97	0.86
RP1280	1.61	0.91	0.59	1.02	0.92	0.7	1.06	0.66	0.7	1.11	0.5	0.66	1.67	1.1	1.02	1.53	0.86	0.96	1.84	0.32	0.36	-0.05	0.18	-0.08	-1.29	-0.42	-1	-1.02	-1.01	-0.66	0.46	0.32	-0.06	0.17	0.48	0.08	-0.13	-0.08	-0.1	-0.2	-0.49	0.29	-0.2	2.23	1.45	0.54	2.37	-0.13	0.23
RP1281	1.89	1.34	1.48	1.68	0.8	1.5	2.11	1.55	1.89	2.07	1.62	2.13	2.23	1.62	1.99	2.29	1.48	2	1.54	1.79	1.26	0.4	0.41	0.27	0.99	0.08	1	1	1	-1	1.14	0.72	0.49	1	1	-1.01	1.01	-0.5	0.33	1	1	-0.89	0.54	0.84	0.46	1.02	0.37	-0.12	0.96
RP1282	1.7	1.21	0.7	-0.27	1.18	0.52	0.51	0.74	0.74	0.46	0.83	0.68	0.1	0.96	0.69	0.21	0.92	0.62	1.5	0.5	0.36	0.99	0.95	0.9	0.96	0.11	1	1	0.42	-0.6	0.83	0.53	0.22	1	0.17	0.82	0.82	-0.03	0.84	1	0.65	0.49	0.9	1.17	1.27	1.03	1.27	0.59	0.92
RP1283	1.36	1.92	1.54	1.33	0.99	1.07	0.09	0.27	0.12	0.01	0.3	0.08	0.93	1.13	1.49	0.73	1.05	1.08	1.45	-0.14	0.93	-0.19	0.38	0.3	-0.9	0.18	-1	-0.98	-1	0.7	0.22	-0.24	-0.5	-0.1	-0.12	0.24	-0.52	-0.35	-0.41	-0.69	-0.97	0.81	0.44	1.5	1.37	0.51	1.37	0.93	0.25
RP1284	0.16	0.27	-0.54	-0.62	0.35	-0.16	0.19	0.45	0.48	0.07	0.64	0.36	-0.23	-0.2	-0.42	-0.55	0.09	-0.22	1.36	1.05	0.74	1.02	1.1	1.15	1.04	-0.02	1	1	1	-1	1.17	0.72	1.23	1	1	-0.68	1.02	-0.5	1.05	1	1	-1.18	1.02	0.84	1.05	1.02	1.92	0.7	1.04
RP1285	2.23	1.2	3	1.22	1.12	0.69	0.63	0.63	0.84	0.47	0.56	0.65	0.31	0.55	0.87	-0.2	0.35	0.05	1.04	0.3	-0.2	-0.17	0.46	0.16	-0.92	-0.1	-1	-1	-0.94	0.29	0.74	0.38	0.02	0.5	0.63	0.05	0.48	-0.19	-0.56	0.23	0.63	0.17	-0.12	1.24	1.21	-0.15	1.02	0.38	0.49
RP1286	2.21	3.24	2.14	1.56	2.56	2.39	0.21	1.66	1.1	0.56	1.21	1.06	1.41	3.16	2.69	1.31	2.6	2.42	1.51	0.31	0.79	0.53	0.63	0.8	-1.11	1.04	-1	-0.98	-0.8	0.85	0.53	0.18	-0.15	0.39	0.12	0.66	0.16	0.27	0.66	0.1	-0.34	1.1	0.24	1.13	1.3	0.79	0.96	1.17	0.55
RP1287	2.63	1.42	1.46	0.73	1.2	0.95	0.68	0.93	1.05	0.72	0.99	1.22	0.78	1.09	1.12	0.92	1.07	1.26	1.78	1.13	1.33	0.85	0.69	1.01	0.86	0.16	1.02	1	-1.01	-0.62	0.92	0.86	1.23	1	0.77	0.43	1.01	0.47	1.13	1	0.43	0.11	0.59	0.33	1.74	0.65	1.99	0.87	0.86
RP1288	0.92	0.48	0.93	0.27	-0.1	0.48	1.07	0.19	0.34	1.43	0.43	1.07	1.2	-0.03	0.29	0.93	0.14	0.58	-0.15	0.26	-0.07	-0.5	0.12	0.13	-0.88	-1.22	-1	-1	-0.95	-0.62	-0.31	-0.45	-0.13	0.02	-0.98	0.3	0.31	-0.68	0.32	0.15	-0.16	-0.36	-0.56	-0.77	0.82	-0.9	-0.64	-0.43	0.13
RP1289	2.64	0.95	1.54	1.53	0.44	0.79	2.46	1.08	1.77	1.97	0.73	1.28	2.64	1.14	1.43	1.71	0.83	1.17	1.49	0.71	0.93	0.88	0.45	0.73	-1.02	0.53	-1	-1	-0.88	0.97	0.09	0.04	0.02	-0.02	-0.22	0.48	0.43	0.04	0.74	0.08	0.31	0.24	0.23	1.31	1.09	-0.23	1.68	1.21	0.41
RP1290	2.13	1.84	1.77	1.37	0.46	0.89	1.36	1.18	1.28	1.08	0.78	1.2	1.59	1.11	1.24	0.94	0.56	0.74	1.67	0.84	0.58	0.52	0.68	0.72	0.99	0.69	1	1	-0.36	0.27	0.78	0.8	0.95	1	0.22	0.73	1.03	0.32	0.61	1	0.81	0.11	1.02	1.34	1.33	1	1.02	0.85	0.93
RP1291	1.48	0.45	-0.85	0.49	0.82	-0.72	0.65	0.87	0.42	0.62	0.73	0.56	0.69	1.35	0.27	0.53	0.75	-0.05	-0.39	0.8	0.83	0.27	0.5	0.51	-0.82	-0.86	-1	-1	-0.93	-0.43	0.7	0.7	0.76	0.77	0.48	0.46	0.6	0.53	0.68	0.52	0.11	0.49	0.18	-0.21	1.64	-0.16	1.28	0.04	0.68
RP1292	0.3	2.78	1.38	0.61	1.98	1.51	0.87	1.3	1.28	0.31	0.61	0.64	-0.22	1.67	1.27	-0.53	0.96	0.76	0.93	0.31	0.19	0.07	0.48	0.27	-0.92	0.85	-1	-0.96	-0.88	0.88	0.46	0.32	0.34	0.44	-0.11	0.55	-0.03	0.26	-0.03	-0.38	-0.35	0.75	-0.02	1.02	1.19	0.3	0.82	1.05	0.63
RP1293	2.12	2.59	2.44	1.59	2.81	2.88	1.45	1.29	1.51	1.4	1.34	1.52	1.89	1.94	2.58	1.65	1.78	1.82	1.89	1.24	1.24	0.45	1.1	0.94	1	1.21	1	1	-0.98	0.97	1.11	0.76	0.87	1	1.11	0.56	1.02	0.89	1.27	1	0.83	1	1.25	2.13	1.61	1.02	1.08	1.05	1.06
RP1294	2.52	2.92	3.98	1.76	3.56	3.77	1.14	1.43	1.3	1.1	1.12	1.17	1.45	2.1	2.3	1.02	1.64	1.4	1.6	1.24	1.17	-0.28	0.84	0.82	-0.88	0.65	-1	-1	-1	0.82	0.94	0.96	0.98	0.92	0.85	1.08	0.77	1.73	1.06	0.63	0.21	0.91	-0.11	1.58	1.14	-0.4	1.06	0.98	0.97
RP1295	1.63	2.12	2.04	0.14	1.48	1.29	0.45	1.22	1.09	-0.65	-0.18	-0.57	0.61	2.21	1.79	-0.07	0.5	0.21	-0.22	-1.12	-1.11	0.85	0.28	0.52	-0.94	-1.76	-1	-1	-0.77	-1.01	-0.93	-1.6	-1.25	-0.88	-1.2	-0.73	-0.58	-1.57	0.1	-0.49	-0.42	-0.84	-0.44	-1.17	0.78	-0.92	1.04	0.51	-0.48
RP1296	2.39	1.68	1.53	0.55	1.41	0.47	-0.59	1.26	0.51	-0.04	1.18	0.47	0.26	1.81	0.79	0.6	1.62	0.89	1.54	1.28	1.38	0.79	0.6	0.9	0.95	0.78	1	1	-0.24	0.23	0.76	1.14	1.2	1	0.71	0.82	0.98	1.93	1.18	1	0.46	0.73	0.76	1.16	1.43	0.76	0.55	0.93	0.88
RP1297	1.36	0.93	0.83	0.83	0.27	0.1	1.29	0.07	0.84	0.69	-0.09	0.27	1.99	0.53	1.34	1.55	0.39	0.82	0.52	-0.2	0.67	-0.43	-0.55	-0.68	-0.87	0.2	-1	-0.99	-1	0.43	-0.22	-0.33	-0.27	0.1	-0.81	0.14	-0.06	0.18	0.18	-0.03	-0.86	0.46	-0.3	0.51	1.16	-0.86	-0.42	0.78	-0.39
RP1298	1.92	1.39	1.51	1.44	1.26	1.15	1.04	0.54	0.96	0.78	0.65	0.74	1.48	0.47	1.07	1.13	0.94	0.99	0.77	0.01	0.1	1.03	0.69	1.05	-1.1	-0.41	-1	-1	-0.92	0.47	0.16	-0.51	-0.66	-0.69	0.43	0.07	-0.27	-0.83	-0.28	-0.66	0.24	0.19	0.44	0.67	1.41	0.15	1.15	1.09	0.18
RP1299	2.12	1.26	1.17	1.54	0.98	1.46	1.45	1.74	1.67	1.58	1.59	1.68	1.35	2	2.02	1.52	1.7	1.75	2.18	1.7	1.52	1.03	0.96	0.97	1.01	1	1	1	-0.61	0.96	0.98	0.98	1.08	1	0.79	1.54	1.03	1.15	1.17	1	0.79	1.27	1.1	1.72	1.41	0.98	1.12	1.27	1.05
RP1300	1.8	1.19	1.06	1.67	1.06	1.49	1.65	0.08	1.23	1.94	-0.05	1.48	1.48	0.62	1.17	1.86	0.22	1.37	0.78	0.81	0.39	1.08	1.29	0.88	-0.01	-0.13	-1	1	-1	-1	-0.25	-0.68	-1	1	-1.31	-1	-0.37	0	-1	1	-2.2	-1	-0.15	0.9	2.11	1.08	1.5	0.43	0.23
RP1301	2.04	1.78	1.62	1.65	1.44	1.64	1.07	0.8	1.12	0.73	0.83	1.09	1.41	0.81	1.09	0.9	0.94	1.04	2	1.1	1.15	0.99	1.34	1.01	1.01	1.73	1	1	1	1.05	1.08	1.35	0.55	1	1	1.17	0.97	2.01	1	1	1	1.4	1.05	2.23	1.02	1.03	2.12	1.1	1.34
RP1302	1.31	1.47	1.03	1.2	0.64	0.52	0.84	0.46	0.42	0.68	0.59	0.38	1.31	0.83	0.7	1.02	0.67	0.44	1.41	0.42	0.92	-0.02	0.22	0.34	-0.9	-0.06	-1	-0.96	-1	-0.49	0.31	0.33	0.32	0.42	-0.12	0.39	-0.26	0.2	0.05	-0.21	-1.11	0.34	0.35	1.45	1.64	0.97	0.74	1.02	0.39
RP1303	2.39	0.19	-0.51	0.82	0.68	-0.01	1.85	0.57	0.99	1.92	0.82	1.28	1.36	0.82	0.83	1.9	0.72	0.93	1.83	1.62	1.32	0.99	1.2	1.1	0.99	1	1	1	-0.46	1.05	1.07	0.88	1.17	1	0.99	1.41	1.05	1.27	1.31	1	1.04	1.22	0.94	1.95	2.22	1	0.94	1.11	1.22
RP1304	1.42	2.06	0.6	0.78	1.19	0.41	1.67	1.33	1.46	0.94	1.05	0.9	1.41	1.43	1.21	0.88	0.9	0.44	1.55	1.17	0.99	0.07	0.41	0.42	0.98	0.45	1	1	-0.71	0.05	0.47	0.88	0.66	1	-0.35	0.91	0.86	1.43	1.03	1	-0.24	0.61	0.65	1.07	1.27	0.78	0.99	1.11	0.74
RP1305	0.69	0.23	-0.04	0.12	-0.23	-0.14	0.93	0.83	1.04	0.98	0.82	1.23	0.87	0.93	0.98	0.99	0.78	0.95	0.31	0.69	0.42	0.93	1.68	1.23	0.68	-0.14	-0.84	1	1	-1	0.95	0.6	-0.65	1	1	-1	0.77	-0.45	-1	1	1	-1	0.4	1.14	-0.22	0.95	1.91	-0.34	1.02
RP1306	1.47	3.16	2.84	1.18	1.91	1.21	0	2.01	1.42	0.78	1.77	1.24	0.5	2.65	2.26	1.42	2.34	1.78	1.55	1.15	1.43	0.88	0.56	0.87	1	0.51	1	1	-0.8	0.3	0.7	0.82	0.88	1	0.28	0.72	0.83	0.9	1.12	1	-0.11	0.68	0.92	1.39	1.33	0.87	1.04	0.96	0.84
RP1307	1.32	1.41	1.5	1.44	1.26	1.49	1.3	0.83	1.46	0.76	0.63	0.8	0.56	0.41	1.29	0.54	0.52	0.84	1.67	0.49	0.62	0.96	1.01	0.94	-0.97	-1	-1	-0.96	-1	1.05	0.62	-0.38	-0.01	-0.22	0.58	1.38	0.18	-1.03	-0.19	-0.05	0.3	1.31	-0.21	2.08	1	0.18	1.65	1.16	0.82
RP1308	3.28	1.49	2.42	2.06	0.78	1.47	4.61	0.55	1.98	3.13	0.42	1.52	4.2	0.76	2.28	2.74	0.42	1.56	1.98	1.22	1.33	0.86	0.54	0.79	1	0.16	1	1	-0.19	-0.68	0.61	0.86	1.14	1	0.32	0.4	0.96	0.47	1.16	1	0.22	0.12	0.86	0.83	1.43	0.85	1.85	0.47	0.81
RP1309	1.25	2.64	1.44	0.48	1.71	0.33	0.51	1.2	1.03	0.48	0.82	0.66	1.54	1.92	1.54	1.07	1.27	0.91	0.98	0.27	0.56	-0.82	0.15	0.11	-0.91	0.8	-1	-1	-0.72	0.69	0.17	0.68	0.09	0.62	-0.67	0.39	0.42	1.11	0.72	0.34	-0.43	0.52	-0.72	1.16	0.92	-0.6	0.95	0.8	0.45
RP1310	0.51	1.86	1.23	-0.84	2.13	0.18	-0.03	1.57	1.11	-0.07	1.22	0.71	-0.29	1.21	0.66	-0.76	0.82	0.06	1.61	1.16	0.77	1.06	1.04	1.1	1.02	0.36	1	1	0.51	-0.57	1.13	1.09	0.99	1	1.17	0.51	1.04	0.05	0.31	1	1.11	-0.15	1.53	1.13	1.4	0.98	1.12	0.69	1.05
RP1311	2.1	2.09	2.23	0.89	1.7	1.8	0.95	1.08	1.15	0.93	0.96	1.29	0.86	1.22	1.15	0.54	1.2	1.05	2.07	0.39	0.3	1.06	1.14	1.33	1	1.1	1	1	-0.32	0.97	1.08	0.72	-0.05	1	1.09	-0.45	1.04	0.41	0.23	1	0.98	0.08	1.23	1.88	1.4	0.98	1.07	1.23	1
RP1312	1.86	2.26	1.8	0.97	1.37	1.52	1.16	0.6	0.82	1.13	0.76	0.95	1.29	1.14	0.97	1.29	0.97	0.94	1.73	0.9	1.31	1.02	0.83	1.15	-1.03	0.17	-1	-0.98	-1	0.91	0.83	0.38	0.74	0.72	0.6	0.64	0.31	0.74	0.76	0.28	-0.17	0.9	0.7	1.87	1.52	1.47	1.42	1.26	0.86
RP1313	2.87	1.65	1.78	2.24	1.19	1.53	2.14	2.04	2.37	2.4	2.06	2.42	2.34	1.88	2.17	2.51	1.6	1.94	1.55	2.28	1.57	0.18	-0.5	-0.09	0.68	-0.14	-0.84	1	1	-1	0.95	0.6	-0.65	1	1	-1	0.77	-0.45	-1	1	1	-1	0.85	2.11	1.31	-0.09	2.77	0.58	1.17
RP1314	1.03	1.16	0.81	0.9	0.63	0.99	1.07	0.38	0.96	1.2	0.4	1.05	0.42	0.82	1.04	1.13	0.4	0.95	1.07	0.43	0.46	0.94	0.66	0.94	0.91	0.62	1	1	1	-0.87	1.01	1.14	1.23	1	1	-0.22	0.94	0.18	1.09	1	1	-0.56	0.94	1.18	0.96	0.96	0.99	0.69	0.79
RP1315	2.19	1.21	1.87	1.73	-0.59	0.62	2.93	0.44	1.06	2.68	0.77	1.49	2.86	0.68	1.32	2.71	0.41	1.06	1.89	2.43	1.78	1	1.27	0.97	1	1.1	1	1	-0.05	1.05	1.07	1.18	1.2	1	0.99	2.32	1.02	1.72	0.94	1	1.14	1.78	1	1.93	1.26	1.04	1.05	1.14	1.31
RP1316	1.11	1.91	1.23	0.61	0.97	0.86	0.67	0.76	0.62	0.31	0.46	0.41	0	1.09	0.89	0.02	0.7	0.87	0.38	0.14	0.2	-0.65	0.24	-0.22	-1.08	-0.2	-1	-1	-0.97	0.53	0.24	0.11	0.02	0.23	-0.11	0.13	-1.17	-0.44	-1.15	-1.2	-1.01	0.58	0.29	0.9	1.38	-0.42	2.08	-0.76	0.29
RP1317	0.16	-0.1	-1.01	-0.23	0.74	0.01	-0.71	-0.36	-1.07	-0.43	0.48	0.25	-0.62	-0.43	-1.39	-0.1	0.47	-0.08	1.01	-1.1	-1.02	1.02	0.45	0.9	0.99	0.6	-1.6	1	0.14	-0.96	0.51	0.78	-0.94	1	-0.18	-0.71	0.91	0.36	-0.48	1	0.16	-0.96	1.12	1.09	1.07	0.95	1.46	-1.4	0.55
RP1318	0.52	0.06	0.21	-0.73	-0.96	-0.81	0.33	0.47	0.29	0.08	-0.07	-0.11	0.06	-0.19	-0.03	-0.24	-0.54	-0.68	0.34	0.38	-0.38	-1.37	-0.44	-0.71	-0.87	-0.02	-1	-1	-0.99	0.24	-0.29	-0.48	0.03	0.22	-1.19	0.61	0.27	-0.55	0.05	0.3	-0.28	0.01	-1.38	0.2	1.05	-1.39	1.77	-1.45	-0.12
RP1319	1.21	2.08	1.77	1.19	2.27	2.63	1.53	1.21	1.32	1.21	1.16	1.26	0.71	0.58	0.49	0.68	0.57	0.52	0.24	0.81	0.14	-0.2	-0.11	0.01	-0.81	-0.91	-1	-1	-1.02	-1	0.54	0.17	-0.05	0.44	0.34	-0.69	0.14	-0.2	-0.14	-0.15	-0.25	-0.31	0.35	-0.05	1.2	-0.18	1	-0.66	0.39
RP1320	1.7	3.22	3.3	1.49	3.09	2.62	0.84	2.13	1.61	0.87	1.55	1.5	0.3	2.45	1.85	0.27	1.67	1.11	1.7	1.13	0.82	0.12	1.07	0.71	1	0.72	1	1	0.74	-0.13	1.13	1.09	0.68	1	1.2	0.49	1.04	0.67	0.61	1	1.1	0.62	0.63	1.42	1.24	1.03	1.08	0.21	1.06
RP1321	1.19	0.87	0.98	0.07	0.25	0.48	0.18	0.08	-0.01	-0.52	-0.28	-0.52	0.57	0.43	0.5	-0.25	-0.35	-0.44	0.53	-0.79	-1.45	0.92	0.4	0.82	0.96	-0.67	1	1	0.13	-0.98	0.75	0.13	0.22	1	0.13	-0.94	0.75	-0.86	0.65	1	0.27	-1.3	0.83	0.16	1.64	0.93	1.31	0.47	0.49
RP1322	1.56	1.54	0.98	0.63	0.74	0.72	0.91	0.67	0.64	0.54	0.6	0.57	1.06	0.44	0.15	0.33	0.2	0.13	0.81	0.4	-0.02	-0.76	0.08	-0.39	-1.04	0.61	-1	-0.99	-1.05	0.45	0.56	0.42	0.24	0.34	0.56	0.01	-0.14	0.16	-0.45	-0.53	0.01	0.4	-0.44	0.69	1.25	-0.34	1.97	-0.51	0.32
RP1323	1.7	0.23	0.74	1.33	-0.77	0.36	0.83	-0.84	-0.53	0.8	-1	-0.65	1.09	-1.26	-0.48	0.66	-1.97	-1.26	1.23	1.04	-0.34	0.95	0.63	0.68	0.96	-0.46	1	1	0.42	-1	0.17	0.08	1	1	-1	0.19	0.82	-0.49	1.2	1	-0.3	-0.5	0.8	0.87	1.98	0.96	0.79	0.64	0.82
RP1324	1.1	0.64	-0.8	-0.87	0.08	-0.73	-0.25	0.31	-0.66	-1.1	-0.37	-0.79	-0.29	0.25	-0.79	-0.94	-0.41	-1.12	0.28	-1.27	-1.42	0.81	0.23	0.53	1	-0.54	-1.37	1	-0.12	-1.07	-0.1	-0.19	-0.97	1	-1.05	-1.02	0.53	-0.75	-0.22	1	-0.32	-1.07	0.71	0.63	0.59	0.8	0.54	-0.41	0.1
RP1325	1.28	1.56	0.93	0.33	0.66	-0.61	1.08	1.11	0.95	0.21	0.41	0.34	1.25	2.05	1.24	0.72	1.13	0.66	0.41	0.01	0.52	-0.27	-0.12	0.03	-0.99	-0.03	-1	-1	-0.95	0.11	-0.04	0.47	-0.22	-0.04	-0.08	-0.13	-0.21	0.75	-0.6	-0.51	-0.53	0.21	-0.22	0.27	1.28	-0.61	1.25	1.02	0
RP1326	1.07	2.13	2.39	2.13	1.09	1.79	-0.15	-0.58	-0.59	-0.52	-0.99	-0.85	0.74	0.61	0.57	0.09	-0.15	-0.04	1.58	-1.52	-0.9	0.18	0.09	0.21	1	-0.22	1	1	-0.65	-0.57	0.36	0.04	-0.83	1	-0.83	-0.91	0.78	-0.41	-0.22	1	-0.4	-0.67	0.64	0.56	1.27	0.83	-0.19	0.33	0.21
RP1327	0.87	1.57	0.65	1.8	2.07	2.03	2	1.37	1.58	2.06	1.62	2.06	1.01	0.87	0.74	1.83	1.37	1.59	2.06	2.08	1.5	1	1.26	1.11	0.97	1.97	1	1	-1	1.05	1.09	0.81	1.16	1	0.94	1.91	1.03	1.81	1.31	1	0.91	1.35	0.98	2.99	1.31	1.01	1.73	1.13	1.23
RP1328	1.8	-0.1	0.1	0.71	0.96	0.38	2.55	0.79	1.59	2.19	1.42	1.83	2.61	0.3	1.33	1.93	1.19	1.62	0.83	1.36	1.28	0.99	0.75	1.01	-0.82	0.65	-1	-1	-0.78	0.7	0.73	0.87	0.45	0.36	0.77	1.12	0.33	1.42	-0.18	-0.13	0.3	0.84	0.94	1.21	1.62	0.14	1.18	1.74	0.71
RP1329	1.58	1.33	0.34	1.25	0.87	1.04	1.2	0.68	1	0.54	0.67	0.72	0.87	1	1.07	1.34	1	0.99	1.87	0.88	1.37	-0.12	0.6	0.54	1	1.16	1	1	-0.97	1.01	0.78	0.83	1.06	1	0.31	0.67	0.89	1.56	1.25	1	-0.01	1.07	0.51	1.9	1.23	0.85	-0.17	0.91	0.91
RP1330	1.36	2.59	1.69	0.67	1.8	0.89	0.71	2.45	1.68	0.69	1.07	1.04	0.5	2.74	2.23	1.13	1.57	1.34	0.66	0.39	1.1	-0.63	-0.13	-0.15	-1.08	0.09	-1	-1	-1.04	0.33	-0.13	0.45	0.29	0.56	-0.82	0.27	0.08	1.23	1.08	0.17	-0.89	0.41	-0.22	0.75	1.13	-0.68	-0.13	0.85	0.11
RP1331	1.85	1.96	0.79	1.78	0.83	0.67	1.56	0.33	0.62	1.42	0.47	0.84	2.33	0.1	0.59	1.69	0.02	0.54	1.38	0.32	0.22	-0.18	0.36	0.46	-1.1	0.49	-0.66	-0.98	-1.01	0.75	0.64	0.4	0.02	0.63	0.52	-0.44	0.44	-0.02	0.52	0.37	0.13	-0.27	0.28	1.04	1.32	0.11	1.03	0.99	0.35
RP1332	1.1	1.53	0.8	1.06	1.65	1.18	1.56	1.13	1.22	1.31	1.31	1.4	0.5	0.88	0.53	0.94	1.21	1.17	1.36	1.29	1.12	-0.41	0.73	0.35	-0.84	0.31	-1	-0.96	-1.01	0.75	0.77	0.88	0.84	0.74	0.57	1.2	0.16	1.19	0.92	0.05	-0.72	0.77	0.05	1.25	1.2	0.03	1.01	0.95	0.92
RP1333	0.74	1.03	0.59	0.15	0.92	0.34	0.05	0.41	0.32	-0.83	-0.34	-0.68	0.95	0.68	0.81	0.17	0.16	-0.02	-0.22	-1.37	-0.78	-1.46	-1.04	-1.31	-0.72	-1.21	-1	-1	-1.06	-1.16	-1.39	-0.97	-1.65	-0.89	-1.27	-1.55	-1.02	-1.14	-1.15	-1.04	-1.21	-1.31	-1.16	-0.65	0.77	-1.23	1.24	-0.75	-1.29
RP1334	2.62	1.78	2.35	1.62	1.1	1.46	2.45	1.76	2.29	2.2	1.9	2.55	2.78	1.91	2.5	2.26	1.92	2.23	1.86	1.55	1.62	1	1.28	0.95	0.93	1.37	1	1	-0.97	1.03	0.77	-0.24	0.22	1	-0.72	1.87	0.75	0.37	0.84	1	0.25	1.63	0.83	2.43	1.24	1.04	1.11	0.97	1.08
RP1335	1.41	1.37	1.48	1.11	0.95	0.95	1.29	1.13	1.52	1.05	1.11	1.41	1.14	1.11	1.49	0.86	0.9	1.07	1.31	1.12	0.79	1.02	1.08	1.2	1.03	-0.04	1	1	1	-0.99	1.17	0.69	1	1	1	-0.98	1.02	-0.5	0.87	1	1	-1.16	1.03	1.07	1.05	1.02	1.93	0.68	0.96
RP1336	2.14	0.82	1.31	1.38	1.11	0.95	1.08	0.81	1.06	0.85	1.06	0.73	0.74	0.65	1.03	0.26	0.71	0.42	1.42	0.89	0.52	0.83	0.58	0.89	0.95	-0.37	1	1	-0.7	-1.18	0.79	0.57	1.2	1	0.54	-0.2	0.98	-0.46	0.86	1	0.45	-0.98	0.52	-0.08	1.7	0.61	2.05	-0.1	0.7
RP1337	0.75	1.63	1.16	0.96	0.96	1.77	1.3	1.08	1.3	1.21	0.95	1.23	1.39	1.68	2.16	1.46	1.05	1.57	1.29	1.1	1.03	1.04	1.08	1.31	1.01	0.16	1	1	0	-0.37	1.08	0.95	1.12	1	1.13	0.78	1.04	0.93	1.31	1	0.93	0.7	1.12	0.94	1.51	0.97	1.04	0.75	1.07
RP1338	1.67	0.9	1.01	1.21	1.47	0.81	1.66	1.28	1.45	1.19	1.4	1.39	1.46	1.41	1.24	1.06	1.44	1.08	1.87	0.95	1.16	0.95	0.83	0.89	1	1.02	1	1	-0.87	1	0.7	0.41	0.67	1	-0.34	1.02	0.86	0.89	0.81	1	-0.03	1.13	1.02	1.92	1.3	0.97	1.03	1.22	0.99
RP1339	2.68	0.77	1.21	1.04	0.34	0.94	1.73	1.16	1.51	1.64	1.19	1.59	1.82	1.06	1.2	1.1	0.86	1.03	1.84	1.69	1.58	1	1.11	0.98	1	1.04	1	1	-0.23	1.05	1.06	0.78	0.37	1	1.12	0.59	1.03	1.3	1.08	1	1.1	1.49	1.03	1.81	1.32	1.01	1.06	1.17	1.22
RP1340	1.24	0.8	0.09	0.37	-0.12	0.24	0.59	-0.22	0.16	0.28	-0.44	0.19	0.58	0.55	0.55	0.79	-0.14	0.67	0.9	-0.54	0.43	-0.36	-0.3	-0.53	-1.01	0.16	-1	-1	-1.03	0.88	-0.7	-0.47	-0.9	-0.48	-1.11	-0.16	-0.98	-0.34	-0.86	-1.09	-1.24	0.4	-0.23	0.96	1.11	-0.73	0.11	0.84	-0.34
RP1341	2.78	1.79	2.43	1.13	0.75	0.94	2.14	0.95	0.92	1.64	0.8	0.88	2.13	1.04	1.12	1.36	0.8	0.58	1.79	0.9	0.85	0.86	0.86	0.86	1	1	1	1	-0.46	1.03	0.95	0.84	0.68	1	0.55	0.97	1.02	0.55	0.79	1	1.03	0.59	0.85	1.52	1.34	0.85	0.49	1.18	1.05
RP1342	1.6	1.59	0.74	0.27	1.48	0.23	0.87	1.2	0.97	0.59	1.32	0.95	0.99	1.46	0.65	0.48	1.41	0.51	1.19	0.89	0.8	0.95	0.66	0.76	1.01	1	-0.76	1	-0.68	0.48	0.36	0.42	0.04	1	-0.91	1	0.86	0.71	0.4	1	0.18	0.57	0.99	1.89	0.93	0.97	1.03	0.22	0.81
RP1343	0.72	0.54	0.27	0.07	-0.74	-0.58	0.63	0.86	0.71	-0.04	0.03	-0.02	1.08	1.04	1.07	0.5	-0.11	0.28	0.41	-0.45	0.19	-1	-0.65	-1.62	-1.21	0.35	-1	-1	-0.98	-0.24	-0.28	-0.16	-0.29	0.08	-0.65	-0.28	-0.99	0.24	-0.26	-0.91	-1.11	0.24	-1	0.77	1.27	-1.06	2.11	-0.8	-0.54
RP1344	1.5	0.88	1.58	0.68	0.56	-0.33	1.17	0.55	0.69	0.91	0.7	0.81	2.34	0.64	0.54	1.04	0.61	0.71	0.58	0.55	0.94	-0.39	0.32	0.1	-0.87	0.62	-1	-1	-1.04	0.14	0.69	0.76	0.4	0.8	0.39	0.32	0.46	1.48	0.75	0.41	-0.54	0.57	-0.09	0.68	1.47	-0.41	1.26	1.05	0.53
RP1345	0.08	-0.86	-0.41	0.75	-0.94	0.08	2.44	1.15	1.7	2.28	0.99	1.88	1.9	0.21	0.93	1.97	-0.1	1.04	-0.15	1.48	0.27	0.91	-0.3	0.35	0.87	0.95	-1	1	1	-0.97	1.16	1.16	-0.09	1	1	-0.73	0.98	0.42	-0.61	1	1	-0.95	0.82	0.9	-0.21	0.92	0.98	-0.33	0.89
RP1346	2.85	2.03	2.13	1.63	2.29	1.99	1.52	0.7	0.69	1.23	0.96	1.31	2.21	0.78	0.8	1.87	1.15	1.48	2.19	1.18	1.55	1.03	0.79	0.98	0.99	1.97	1	1	-1	0.89	0.85	0.52	0.65	1	0.26	0.98	0.95	0.96	0.55	1	0.35	1.04	1.15	2.92	1.87	1.01	1.8	2.17	0.93
RP1347	1.83	2.76	1.27	1.41	2.18	2.17	1.06	1.12	1.2	0.83	0.89	1.04	0.85	1.67	1.48	1.14	1.13	1.33	1.44	0.48	0.76	-0.02	0.57	0.49	-0.78	-0.11	-1	-1	-0.97	0.07	0.58	0.21	0.37	0.48	0.25	0.29	-0.27	-0.08	-0.29	-0.65	-0.63	0.39	0.57	1.23	1.41	-0.35	1.46	1.08	0.62
RP1348	2.27	2.32	1.74	1.32	1.51	1.2	0.96	1.24	1.11	0.93	1.07	1	1.33	2	1.93	1.58	1.93	1.53	1.81	0.65	0.77	0.28	0.79	0.69	-1.05	-1	-1	-0.98	-1	0.88	0.73	0.38	0.38	0.58	0.41	0.72	0.06	0.24	0.23	-0.2	-0.44	0.85	0.46	2.35	1.39	0.79	1.75	1.07	0.8
RP1349	1.39	1.56	0.65	0.29	0.9	0.38	0.15	-0.67	-0.57	-0.13	-0.85	-0.75	-0.23	-0.05	-0.83	-0.31	-0.36	-0.42	1.58	-0.69	0.03	0.89	0.41	0.69	-0.86	0.07	-1	-0.96	-0.8	1.05	-0.7	-2.26	-1.79	-1.8	0.19	0.34	-1.15	-1.63	0.2	-1.17	0.06	0.86	0.47	1.62	1.01	0.55	1.81	1.17	-0.51
RP1350	1.51	-0.56	-0.3	0.28	-0.14	-0.11	0.48	-0.43	-0.24	-0.3	-0.06	-0.19	1.21	-0.49	0.03	-0.12	-0.03	-0.09	1.37	-0.78	-0.52	1.16	0.62	1.07	0.96	-0.42	1	1	-0.77	-0.89	0.47	0.06	-0.48	1	-0.3	-0.74	0.87	-0.44	0.04	1	0.02	-0.68	1.35	-0.29	1.56	1.02	1.24	0.62	0.49
RP1351	1.41	0.65	1.62	0.79	0.7	0.94	1.02	0.51	1.11	1.11	0.85	1.2	1.27	0.38	0.64	0.74	0.68	0.63	0.75	1.31	1.11	0.97	1.04	0.86	-0.95	0.26	-1	-0.99	-0.57	1.04	0.64	0.53	0.22	0.1	0.5	1.93	0.57	0.57	0.64	0.38	1.04	1.39	-0.18	0.82	0.99	-0.69	0.54	1.18	0.96
RP1352	1.39	0.14	0.71	0.86	-0.11	0.59	1.97	0.67	1.15	2.32	0.65	1.71	0.82	-0.29	-0.52	0.94	-0.15	0.3	1.31	0.96	-0.3	0.92	0.55	0.65	0.99	-0.33	1	1	0.55	-1	0.17	0.28	1	1	-1	0.15	0.85	-0.35	1.2	1	-0.31	-0.47	0.81	0.82	1.24	0.94	0.86	0.39	0.79
RP1353	1.33	1.57	1.36	0.73	-0.77	0.22	0.77	0.52	1.05	0.93	-0.11	0.54	0.84	1.04	1.3	1.65	0.97	0.56	1.84	0.96	1.13	0.63	0.01	0.43	0.99	0.26	1	1	-0.67	-0.13	-0.44	0.49	0.72	1	-1.2	0.2	0.64	0.85	0.81	1	-0.68	0.25	1.13	0.29	1.26	0.6	1.16	0.73	0.31
RP1354	1.49	1.91	1.41	1.54	1.74	1.87	0.45	-0.33	0.1	0.45	-0.35	0.25	1.44	1.4	1.28	1.8	1.41	1.68	1.88	-0.46	1.4	0.95	0.74	0.77	-0.9	1.8	-0.97	-0.96	1	1.03	-0.38	-1.42	-1.75	-1.61	1	1.87	-0.54	0.35	-1.37	-1.13	1	1.63	-0.7	1.53	0.95	0.26	1	1.1	-0.11
RP1355	1.44	1.17	1.05	0.75	0.85	0.67	0.15	0.47	0.45	1.23	0.59	1.14	0.14	0.33	-0.27	0.6	0.28	0.34	1.29	0.84	0.14	0.85	0.57	0.65	1	-0.19	1	1	-0.47	-0.57	0.02	0.06	0.35	1	-1.07	0.81	0.71	-0.03	0.21	1	-0.36	0.18	0.77	0.7	1.47	0.85	1.14	0.49	0.64
RP1356	0.37	-0.53	-0.55	0.36	-0.63	-0.29	-0.15	-0.25	-0.41	-1.51	-0.58	-1.05	-0.33	-0.97	-0.57	-1.6	-0.96	-1.33	0.35	-1.09	-1.26	-0.69	-0.61	-0.58	-0.89	-1.07	-1	-1	-0.48	-1.17	-1.22	-0.62	-1.51	-1.1	-1.15	-0.74	-0.32	-0.82	-0.59	-0.86	-0.58	-1.2	-1.04	-0.28	0.91	-1	-0.87	-1.28	-0.66
RP1357	1.6	0.41	0.75	1.24	0.07	0.83	1.04	-0.42	0.76	2.01	-0.01	1.46	-0.83	-1.12	-0.51	0.95	-0.89	0.3	1.12	0.35	-0.79	0.89	0.45	0.62	0.99	-0.38	-1.24	1	0.28	-1.06	0.02	0.25	0.37	1	-1.01	0.02	0.81	-0.2	-0.13	1	-0.41	-0.66	0.79	0.84	1.43	0.9	0.72	-0.27	0.69
RP1358	1.37	2.2	1.33	1.17	1.64	1.37	0.71	0.4	0.17	0.6	0.18	0.3	0.7	0.63	0.6	0.87	0.64	0.54	1.44	0.02	0.57	0.12	0.55	0.47	-0.96	0.19	-1	-0.98	-1	0.91	0.34	-0.34	-0.34	-0.23	0.24	0.31	-0.25	-0.48	-0.59	-0.72	-0.2	0.82	0.71	1.7	1.37	0.64	1.27	1.02	0.33
RP1359	2.18	1.98	0.97	0.33	1.79	1.31	-0.91	0.78	0.07	-0.66	0.52	0.4	-0.28	1.08	0.1	-0.49	0.52	0.17	0.23	-0.56	-0.39	-0.13	-0.16	0.04	-0.85	-0.64	-1	-1	-0.97	-0.58	-0.05	0.66	-0.73	-0.3	-0.16	0.09	0.44	0.33	-0.66	0	0.45	-0.38	-0.15	0.28	1	-0.51	-0.19	-0.04	0.06
RP1360	0.79	0.53	0.07	1.16	0.57	1.03	-0.12	0.76	0.57	0.64	1.16	1.04	-0.41	0.59	0.31	1.49	1.03	1.02	0.67	1.23	0.79	1	1.11	0.93	0.93	-0.86	1	1	-0.89	-0.92	0.81	-0.18	0.95	1	-0.49	0.75	0.94	-0.45	1.38	1	0.45	0.28	0.84	0.68	1.25	1.04	0.94	0.64	1.25
RP1361	2.43	0.73	0.76	0.57	0.23	0.25	1.48	1.17	0.84	1.59	1.38	1.51	1.5	1.19	0.77	1.35	1.55	1.17	1.97	1.89	1.89	0.99	1.12	0.92	0.9	1.06	1.02	1	-0.72	1.03	0.7	0.06	0.37	1	-0.34	1.87	0.69	0.62	0.37	1	0.41	1.63	0.82	2.01	1.35	1.03	1.11	1.06	0.94
RP1362	1.24	2.56	1.95	1.56	1.58	1.2	0.92	1.05	1.17	0.81	0.94	0.99	1.3	1.76	2.12	1.34	1.22	1.29	1.8	0.81	1.03	-0.45	0.65	0.26	-0.9	-1	-1	-0.96	-1	0.79	0.93	0.48	0.44	0.8	0.78	0.23	0.29	0.68	0.37	0.04	-0.11	1.02	-0.18	1.95	1.08	-0.2	1.49	0.96	0.89
RP1363	1.03	-0.07	-0.51	0.4	-0.24	0.09	-0.06	-0.18	-0.51	0.33	0.23	0.15	0.47	-0.52	-0.67	0.53	0.08	0.28	0.82	0.56	0.65	0.97	0.79	0.97	1.02	0.7	-0.07	1	1	-0.94	0.92	1.83	1.21	1	1	0.79	0.92	1.04	1.05	1	1	0.39	1	0.91	0.48	1	1	-0.29	0.88
RP1364	-0.73	-0.92	-1.6	0.37	-1.14	-0.46	2.18	-0.13	0.9	1.09	-0.22	0.58	1.28	-0.39	0.35	1.08	-0.31	0.3	0.33	-0.08	0.1	0.18	-0.01	0.23	0.99	-0.29	-1	1	-0.86	-0.96	0.51	0.69	0.56	1	0.18	-0.48	0.89	0.45	-0.05	1	-0.01	-0.55	0.72	0.48	1.09	0.82	1	-0.89	0.42
RP1365	1.05	0.01	-0.23	0.6	-0.53	0.21	-0.25	-0.14	0.09	0.16	-0.21	-0.02	0.21	-0.26	0.14	0.41	-0.57	-0.05	0.14	-0.95	-1.38	0.81	0.24	0.54	0.98	-0.98	-1.49	1	-0.68	-1.02	-0.53	-1.29	-1.06	1	-1.3	-1.26	0.29	-1.14	-0.38	1	-0.64	-1.22	0.67	0.47	1.6	0.8	0.37	-0.34	-0.12
RP1366	2.98	2.68	2.88	2.41	1.91	2.15	1.51	1.21	1.27	1.46	1.31	1.58	1.87	1.58	1.66	1.92	1.41	1.64	1.81	1.26	1.21	1.01	1.12	1.18	1.01	1.29	1	1	1	0.17	1.17	0.85	0.86	1	1	-0.5	1.01	-0.37	0.33	1	1	-0.57	0.95	1.52	1.46	0.94	0.97	0.89	0.98
RP1367	1.77	1.97	1.67	1.5	1.54	1.68	1.42	2.27	2.05	1.79	1.49	1.9	1	1.76	1.86	1.42	1.4	1.77	1.65	1.23	1.06	0.94	0.58	0.83	1	-0.33	1.01	1	-0.18	-0.91	0.63	0.76	1.18	1	0.28	0.49	0.98	0.34	1.02	1	0.37	-0.02	0.99	0.6	1.42	0.96	1.64	0.45	0.87
RP1368	0.3	1.03	0.56	-0.93	-0.51	-0.88	0.8	-0.47	-0.19	-0.7	-0.64	-0.85	0.8	-0.11	-0.19	-1	-0.73	-0.93	0.21	-0.35	-0.38	-0.35	-0.83	-0.37	-0.76	-0.8	-1	-1	-0.96	-0.93	-0.28	-0.32	-0.71	-0.5	-0.29	-0.89	0.25	-0.83	-0.62	-0.22	0.05	-1.36	-0.08	0.09	0.86	-0.46	-0.21	-0.37	-0.56
RP1369	0.84	0.72	0.87	0.44	0.75	1	-0.53	0.66	0.22	-0.11	0.62	0.48	-1.06	0.39	0	-0.56	0.12	-0.07	0.69	-0.49	-1.02	0.76	-0.03	0.26	1.01	-0.08	-1.42	1	0.74	-1.07	0.81	0.57	-0.85	1	0.22	-1.19	0.9	-0.49	-0.3	1	0.48	-1.21	0.68	0.18	0.76	0.74	1.66	-0.21	0.9
RP1370	0.41	1.26	0.31	-0.19	0.18	-0.18	-0.92	1.18	0.56	-0.92	0.2	0.3	-0.51	1.02	-0.12	-1.78	-0.12	-0.57	0.29	-1.43	-1.52	0.05	-0.53	-0.28	-0.91	-0.99	-1.01	-1	0.05	-1	-1.5	-0.87	-1.84	-1.63	-1.07	-0.54	-0.82	-0.99	-1.41	-1.14	-0.4	-0.98	-0.75	-0.26	0.69	-0.95	1.36	0.01	-0.94
RP1371	-0.54	0.84	0.28	0.1	0.49	0.5	0.25	0.91	0.16	1.12	1.14	1.45	-1.51	0.53	-0.67	0.3	0.88	0.7	1.54	1.05	0.22	0.78	0.1	0.49	0.99	0.53	1	1	1.02	-0.73	0.05	1.15	1	1	-0.99	-0.05	0.93	1.14	1.2	1	-0.39	0.29	0.71	1.23	1.64	0.77	0.94	0.98	0.54
RP1372	0.41	-0.04	-0.49	-0.42	-0.57	-0.52	0.56	0.46	0.66	0.57	0.5	0.85	0.34	0.57	0.49	0.5	0.5	0.61	0.23	0.25	0.02	0.67	1.88	1.31	0.68	-0.14	-0.84	1	1	-1	0.95	0.6	-0.65	1	1	-1	0.77	-0.45	-1	1	1	-1	-0.11	0.99	-0.65	0.64	0.93	-0.55	0.95
RP1373	1.82	0.39	0.63	-0.3	-0.02	-0.32	1.71	-0.07	0.62	-0.08	-0.26	-0.22	1.7	0.34	0.81	0.06	-0.13	-0.19	1.07	-0.19	-0.26	0.79	0.17	0.52	1.01	0.02	1	1	0.39	-0.91	0.01	0.3	-0.04	1	-1	0.08	0.65	-0.29	0.25	1	-0.26	-0.32	0.72	0.9	1.79	0.79	0.75	0.28	0.14
[truncated: 463 more rows]
[truncated: 164 more columns]
